# Supplementary material for: Non-coding Regulatory Variants in ASD (Autism Spectrum Disorders) Disrupt CTCF Domains and Shape Cell-Type–Specific Neurodevelopmental Landscapes Revealed by Single-Cell Analyses and Cortical Organoids
Source: Research Square preprint supplement (doi:10.21203/rs.3.rs-9650619/v1), 2026-06-05
Supplement: Supplementary file 1 [file 2b444ec2b31749099afa237d.xlsx]

## Sheet: Supplementary Table 1
Supplementary Table 1. De Novo Non-Coding Variants with High Predicted Regulatory Effects and cCRE Annotation
SAMPLE		COORDINATES (GRch38)				SEI PREDICTION			ENCODE CCRE (GRch38)
Sample Code	Sample sex	CHR	BP	REF	ALT	Regulatory class	Score	Effect	cCRE code	cCRE chr	cCRE start	cCRE end	ENCODE class
4B699	Male	chr4	176792930	G	C	CTCF CTCF-Cohesin	6.67949	-	EH38E2346040	chr4	176792800	176793142	pELS,CTCF-bound
G01-GEA104HI	Male	chr12	31959748	C	G	CTCF CTCF-Cohesin	6.47923	+	EH38E1603483	chr12	31959711	31959878	pELS,CTCF-bound
4B702	Male	chr11	12378098	G	A	CTCF CTCF-Cohesin	6.27511	+	EH38E1521603	chr11	12377804	12378135	pELS,CTCF-bound
G01-GEA235HI	Male	chr5	134556267	C	CCG	CTCF CTCF-Cohesin	6.06794	-	EH38E2410182	chr5	134556048	134556398	dELS,CTCF-bound
G01-GEA065HI	Male	chr8	124450350	G	T	CTCF CTCF-Cohesin	5.89963	-	EH38E2663590	chr8	124450213	124450546	pELS,CTCF-bound
3E475	Male	chr2	38377584	C	T	CTCF CTCF-Cohesin	5.67155	-	EH38E1989076	chr2	38377549	38377722	pELS,CTCF-bound
4C200	Female	chr6	20403419	TTCCCCGCCCTGTCCCCC	T	CTCF CTCF-Cohesin	4.62473	+	EH38E2452322	chr6	20403309	20403659	PLS,CTCF-bound
2F730	Male	chr9	86947828	G	GGGGGGGGGC	CTCF CTCF-Cohesin	4.34236	-	EH38E2703669	chr9	86947644	86947991	pELS,CTCF-bound
G01-GEA224HI	Female	chr19	43504297	G	A	E5 B-cell-like	3.44865	-	EH38E1956168	chr19	43504054	43504402	pELS,CTCF-bound
G01-GEA103HI	Male	chr11	123430229	T	TAGA	CTCF CTCF-Cohesin	2.84295	-	EH38E1578128	chr11	123429939	123430287	pELS,CTCF-bound
G01-GEA045HI	Male	chr20	5610436	G	A	E4 Multi-tissue	2.81115	+	EH38E2094998	chr20	5610309	5610648	pELS,CTCF-bound
G01-GEA148HI	Female	chr6	156617638	C	A	E12 Erythroblast-like	2.75216	-	EH38E2518132	chr6	156617440	156617762	dELS,CTCF-bound
3B335	Male	chr11	72781973	C	G	CTCF CTCF-Cohesin	2.53213	+	EH38E1551109	chr11	72781663	72782011	PLS,CTCF-bound
G01-GEA110HI	Female	chr10	17023604	TG	T	TF5 AR	2.49496	+	EH38E1451607	chr10	17023418	17023759	dELS,CTCF-bound
G01-GEA287HI	Male	chr9	68705284	C	T	CTCF CTCF-Cohesin	2.39459	+	EH38E2694654	chr9	68705036	68705385	pELS,CTCF-bound
G01-GEA208HI	Male	chr5	159331574	C	T	CTCF CTCF-Cohesin	2.33844	+	EH38E2426036	chr5	159331488	159331837	PLS,CTCF-bound
3C559	Male	chr4	38319271	A	G	TF3 FOXA1 / AR / ESR1	2.17781	+	EH38E2291197	chr4	38319229	38319419	dELS,CTCF-bound
3D633	Male	chr9	136546351	A	G	CTCF CTCF-Cohesin	2.17312	+	EH38E2736793	chr9	136546111	136546461	PLS,CTCF-bound
3E465	Male	chr2	11374668	A	G	CTCF CTCF-Cohesin	2.13133	-	EH38E1973457	chr2	11374598	11374948	dELS,CTCF-bound
G01-GEA027HI	Male	chr4	183508083	A	G	E9 Liver / Intestine	2.10868	-	EH38E2348288	chr4	183508005	183508204	dELS
4B716	Male	chr10	74233	G	C	CTCF CTCF-Cohesin	2.02882	-	EH38E1440848	chr10	74090	74289	PLS,CTCF-bound
G01-GEA149HI	Male	chr14	20989738	C	CCCCCGG	E5 B-cell-like	1.98283	-	EH38E1701342	chr14	20989702	20990052	PLS,CTCF-bound
3C142	Female	chr17	50954394	T	G	CTCF CTCF-Cohesin	1.93734	-	EH38E1870602	chr17	50954273	50954608	dELS,CTCF-bound
G01-GEA025HI	Male	chr19	11197799	TCC	T	E12 Erythroblast-like	1.9004	+	EH38E1939044	chr19	11197760	11198045	pELS,CTCF-bound
4B691	Female	chr1	166166837	AC	A	CTCF CTCF-Cohesin	1.79503	+	EH38E1394031	chr1	166166635	166166848	PLS,CTCF-bound
G01-GEA192HI	Male	chr15	89057652	C	G	E4 Multi-tissue	1.78518	+	EH38E1786324	chr15	89057513	89057862	dELS,CTCF-bound
G01-GEA267HI	Male	chr17	66540579	C	A	CTCF CTCF-Cohesin	1.66218	-	EH38E1879841	chr17	66540446	66540756	dELS,CTCF-bound
G01-GEA192HI	Male	chr1	151459105	C	T	E4 Multi-tissue	1.65018	+	EH38E1384321	chr1	151458953	151459251	PLS,CTCF-bound
G01-GEA186HI	Female	chr8	70403470	CA	C	CTCF CTCF-Cohesin	1.61925	-	EH38E2639062	chr8	70403285	70403590	pELS,CTCF-bound
G01-GEA118HI	Female	chrX	149540547	C	CAGTAA	E5 B-cell-like	1.56291	+	EH38E2772540	chrX	149540356	149540580	PLS,CTCF-bound
3C573	Male	chr15	90062583	C	T	E4 Multi-tissue	1.55543	-	EH38E1787168	chr15	90062389	90062738	dELS
G01-GEA296HI	Male	chr1	234908160	T	TAAAAA	E4 Multi-tissue	1.54839	-	EH38E1433849	chr1	234908030	234908379	dELS,CTCF-bound
G01-GEA140HI	Male	chr9	14433972	C	A	CTCF CTCF-Cohesin	1.52238	-	EH38E2683250	chr9	14433831	14434179	dELS,CTCF-bound
G01-GEA302HI	Male	chr17	32486865	G	A	E4 Multi-tissue	1.51529	+	EH38E1856802	chr17	32486777	32487091	pELS,CTCF-bound
G01-GEA096HI	Male	chr14	104171705	C	T	CTCF CTCF-Cohesin	1.42155	-	EH38E1745640	chr14	104171399	104171748	dELS,CTCF-bound
G01-GEA184HI	Female	chr2	231365340	G	A	E1 Stem cell	1.40161	+	EH38E2082732	chr2	231365314	231365584	dELS,CTCF-bound
G01-GEA209HI	Male	chr10	51699609	C	A	TF2 CEBPB	1.38349	+	EH38E1467993	chr10	51699539	51699741	PLS,CTCF-bound
2K890	Male	chr4	145936712	G	A	CTCF CTCF-Cohesin	1.33371	-	EH38E2333222	chr4	145936680	145937025	pELS,CTCF-bound
G01-GEA043HI	Male	chr2	207164358	C	T	TF5 AR	1.28298	-	EH38E2069483	chr2	207164085	207164362	pELS
4B858	Male	chr4	56436488	C	A	E4 Multi-tissue	1.27854	+	EH38E2298634	chr4	56436486	56436745	pELS,CTCF-bound
G01-GEA136HI	Male	chr4	159947219	T	G	CTCF CTCF-Cohesin	1.25676	+	EH38E2340301	chr4	159947059	159947337	CTCF-only,CTCF-bound
G01-GEA292HI	Male	chr1	156076916	A	G	P Promoter	1.24143	+	EH38E1387583	chr1	156076777	156077111	pELS,CTCF-bound
3A671	Female	chr5	134176634	G	A	CTCF CTCF-Cohesin	1.20608	-	EH38E2409903	chr5	134176575	134176757	PLS,CTCF-bound
5B577	Male	chr3	71754290	CG	C	E4 Multi-tissue	1.17121	-	EH38E2213687	chr3	71754175	71754334	PLS,CTCF-bound
3E465	Male	chr17	7436430	T	G	P Promoter	1.15852	+	EH38E1844368	chr17	7436426	7436767	pELS,CTCF-bound
G01-GEA208HI	Male	chr3	93973940	A	T	E12 Erythroblast-like	1.12427	+	EH38E2219611	chr3	93973809	93974159	PLS,CTCF-bound
5L790	Male	chr6	146543374	G	C	CTCF CTCF-Cohesin	1.11171	+	EH38E2512365	chr6	146543163	146543409	pELS,CTCF-bound

## Sheet: Suplementary Table 2.1
Supplementary Table 2.1. Inherited Non-Coding Variants with High Predicted Regulatory Effects and cCRE Annotation
SAMPLE		COORDINATES (GRch38)				SEI PREDICTION			ENCODE CCRE (GRch38)
Sample Code	Sample sex	Chr	bp	REF	ALT	Regulatory class	Score	Effect	cCRE code	cCRE chr	cCRE start	cCRE end	ENCODE class
G01-GEA065HI	Male	chr9	109440901	TA	T	CTCF CTCF-Cohesin	41.4079	-	EH38E2716750	chr9	109440742	109441091	dELS,CTCF-bound
G01-GEA096HI	Male	chr20	48620659	AT	A	CTCF CTCF-Cohesin	41.3718	-	EH38E2117983	chr20	48620476	48620825	dELS,CTCF-bound
G01-GEA301HI	Male	chr19	7341266	GC	G	CTCF CTCF-Cohesin	41.2766	-	EH38E1936382	chr19	7341060	7341407	dELS,CTCF-bound
G01-GEA309HI	Male	chr1	168082436	TAG	T	CTCF CTCF-Cohesin	41.1315	-	EH38E1395197	chr1	168082235	168082585	dELS,CTCF-bound
G01-GEA169HI	Male	chr12	49235334	GGCGCCATCTGCTGGAC	G	CTCF CTCF-Cohesin	40.2487	-	EH38E1609942	chr12	49235171	49235419	dELS,CTCF-bound
G01-GEA025HI	Male	chr2	105369980	G	A	CTCF CTCF-Cohesin	39.9618	-	EH38E2021716	chr2	105369812	105370162	dELS,CTCF-bound
G01-GEA118HI	Female	chr16	13866317	G	A	CTCF CTCF-Cohesin	39.5322	-	EH38E1803430	chr16	13866173	13866522	CTCF-only,CTCF-bound
G01-GEA220HI	Male	chr2	96407519	G	C	CTCF CTCF-Cohesin	38.0198	-	EH38E2016626	chr2	96407465	96407814	dELS,CTCF-bound
G01-GEA266HI	Male	chr18	27605420	AG	A	CTCF CTCF-Cohesin	37.8361	-	EH38E1906396	chr18	27605170	27605519	dELS,CTCF-bound
G01-GEA024HI	Female	chr7	143008098	CCACCAGGTGGAGCTGAATCCA	C	CTCF CTCF-Cohesin	37.7214	-	EH38E2597897	chr7	143007939	143008287	dELS,CTCF-bound
G01-GEA309HI	Male	chr17	8080117	AG	A	CTCF CTCF-Cohesin	37.5934	-	EH38E1844928	chr17	8079904	8080241	pELS,CTCF-bound
2K890	Male	chr12	48890860	C	G	CTCF CTCF-Cohesin	37.4554	-	EH38E1609657	chr12	48890707	48891046	pELS,CTCF-bound
G01-GEA003HI	Male	chr2	95115519	G	A	CTCF CTCF-Cohesin	37.3531	-	EH38E2016050	chr2	95115351	95115689	dELS,CTCF-bound
G01-GEA032HI	Female	chr6	39892710	C	G	CTCF CTCF-Cohesin	36.6684	-	EH38E2465942	chr6	39892573	39892822	dELS,CTCF-bound
G01-GEA307HI	Female	chr13	106620134	C	G	CTCF CTCF-Cohesin	36.6335	-	EH38E1695922	chr13	106619982	106620248	dELS,CTCF-bound
3D317	Female	chr6	107675520	C	T	CTCF CTCF-Cohesin	36.4641	-	EH38E2491625	chr6	107675389	107675650	dELS,CTCF-bound
G01-GEA160HI	Male	chr5	138068956	T	G	CTCF CTCF-Cohesin	36.3907	-	EH38E2412358	chr5	138068771	138069113	pELS,CTCF-bound
G01-GEA148HI	Female	chr5	97231227	C	T	CTCF CTCF-Cohesin	36.2965	-	EH38E2393714	chr5	97231097	97231408	CTCF-only,CTCF-bound
3C142	Female	chr9	132507843	G	C	CTCF CTCF-Cohesin	35.5773	-	EH38E2733250	chr9	132507666	132508007	dELS,CTCF-bound
G01-GEA025HI	Male	chr17	70552624	C	A	CTCF CTCF-Cohesin	34.6148	-	EH38E1882549	chr17	70552457	70552782	dELS,CTCF-bound
3E468	Female	chr20	7936669	G	A	CTCF CTCF-Cohesin	34.3861	-	EH38E2096021	chr20	7936442	7936792	dELS,CTCF-bound
G01-GEA025HI	Male	chr1	39092544	C	G	CTCF CTCF-Cohesin	34.1593	-	EH38E1339099	chr1	39092381	39092685	dELS,CTCF-bound
G01-GEA110HI	Female	chr2	130873902	G	A	CTCF CTCF-Cohesin	34.1136	-	EH38E2032978	chr2	130873813	130873984	dELS,CTCF-bound
G01-GEA101HI	Male	chr21	35051416	G	C	CTCF CTCF-Cohesin	34.1038	-	EH38E2139357	chr21	35051314	35051664	dELS,CTCF-bound
G01-GEA309HI	Male	chr4	86044194	CT	C	CTCF CTCF-Cohesin	34.0237	-	EH38E2309838	chr4	86044067	86044322	dELS,CTCF-bound
G01-GEA262HI	Female	chr7	29102741	G	A	CTCF CTCF-Cohesin	34.0002	-	EH38E2544170	chr7	29102658	29102820	dELS,CTCF-bound
G01-GEA167HI	Male	chr1	22665947	G	C	CTCF CTCF-Cohesin	33.9611	-	EH38E1327162	chr1	22665867	22666098	CTCF-only,CTCF-bound
G01-GEA260HI	Male	chr7	41977297	G	A	CTCF CTCF-Cohesin	33.7834	-	EH38E2551623	chr7	41977081	41977411	dELS,CTCF-bound
3D616	Female	chr19	14043210	G	C	CTCF CTCF-Cohesin	32.9613	-	EH38E1940992	chr19	14043034	14043380	dELS,CTCF-bound
G01-GEA219HI	Male	chr4	52376289	CCAGCAGGGGG	C	CTCF CTCF-Cohesin	32.9133	-	EH38E2296385	chr4	52376204	52376549	dELS,CTCF-bound
4B848	Male	chr9	90871228	G	A	CTCF CTCF-Cohesin	32.7411	-	EH38E2706433	chr9	90871076	90871354	dELS,CTCF-bound
G01-GEA229HI	Male	chr6	148145113	G	A	CTCF CTCF-Cohesin	32.7221	-	EH38E2513115	chr6	148144971	148145312	dELS,CTCF-bound
XH678	Male	chr2	84303103	AG	A	CTCF CTCF-Cohesin	32.6967	-	EH38E2013004	chr2	84302925	84303213	dELS,CTCF-bound
G01-GEA114HI	Male	chr18	76803940	C	T	CTCF CTCF-Cohesin	32.6061	-	EH38E1927977	chr18	76803746	76804094	pELS,CTCF-bound
G01-GEA148HI	Female	chr10	52818125	G	A	CTCF CTCF-Cohesin	32.3182	-	EH38E1468542	chr10	52817988	52818337	dELS,CTCF-bound
G01-GEA214HI	Male	chr12	93419614	C	G	CTCF CTCF-Cohesin	32.0923	-	EH38E1633442	chr12	93419464	93419753	dELS,CTCF-bound
3E475	Male	chr7	157273730	C	G	CTCF CTCF-Cohesin	31.7822	-	EH38E2604381	chr7	157273573	157273909	dELS,CTCF-bound
3D317	Female	chr22	50252339	C	T	CTCF CTCF-Cohesin	31.7608	-	EH38E2172938	chr22	50252178	50252486	pELS,CTCF-bound
G01-GEA180HI	Male	chr1	224050999	C	A	CTCF CTCF-Cohesin	31.7488	-	EH38E1426232	chr1	224050740	224051072	dELS,CTCF-bound
3C572	Male	chr1	118151530	G	C	CTCF CTCF-Cohesin	31.7349	-	EH38E1380853	chr1	118151454	118151619	CTCF-only,CTCF-bound
3C560	Male	chr20	45011271	A	T	CTCF CTCF-Cohesin	31.5259	-	EH38E2115257	chr20	45011201	45011545	dELS,CTCF-bound
G01-GEA053HI	Female	chr12	68830404	C	T	CTCF CTCF-Cohesin	31.3624	-	EH38E1622532	chr12	68830227	68830500	dELS,CTCF-bound
G01-GEA032HI	Female	chr1	204989487	A	T	CTCF CTCF-Cohesin	31.3358	-	EH38E1414978	chr1	204989315	204989614	dELS,CTCF-bound
3C554	Male	chr14	77070850	T	G	CTCF CTCF-Cohesin	31.2937	-	EH38E1729881	chr14	77070678	77071022	dELS,CTCF-bound
3D317	Female	chr19	11131147	G	A	CTCF CTCF-Cohesin	31.2725	-	EH38E1938969	chr19	11131075	11131423	dELS,CTCF-bound
3D317	Female	chr3	38480030	C	T	CTCF CTCF-Cohesin	31.1927	-	EH38E2193281	chr3	38479910	38480108	CTCF-only,CTCF-bound
G01-GEA001HI	Male	chr11	69643511	C	T	CTCF CTCF-Cohesin	31.1503	-	EH38E1548982	chr11	69643284	69643631	dELS,CTCF-bound
G01-GEA101HI	Male	chr21	35051415	A	C	CTCF CTCF-Cohesin	30.5536	-	EH38E2139357	chr21	35051314	35051664	dELS,CTCF-bound
G01-GEA163HI	Male	chr10	132940490	C	A	CTCF CTCF-Cohesin	30.4928	-	EH38E1512767	chr10	132940428	132940601	dELS,CTCF-bound
G01-GEA235HI	Male	chr2	189412552	G	C	CTCF CTCF-Cohesin	30.3717	-	EH38E2060151	chr2	189412459	189412616	dELS,CTCF-bound
G01-GEA241HI	Male	chr5	61817921	C	T	CTCF CTCF-Cohesin	30.3716	-	EH38E2376688	chr5	61817643	61817990	dELS,CTCF-bound
2K890	Male	chr6	33744566	C	T	CTCF CTCF-Cohesin	30.181	-	EH38E2460953	chr6	33744245	33744593	dELS,CTCF-bound
3E473	Male	chr6	84228159	G	A	CTCF CTCF-Cohesin	30.0382	-	EH38E2482832	chr6	84228061	84228226	pELS,CTCF-bound
G01-GEA248HI	Male	chr5	112757780	C	G	CTCF CTCF-Cohesin	29.8623	-	EH38E2399336	chr5	112757588	112757938	dELS,CTCF-bound
5L790	Male	chr17	2026183	C	A	CTCF CTCF-Cohesin	29.696	-	EH38E1840524	chr17	2026019	2026316	pELS,CTCF-bound
G01-GEA284HI	Male	chr3	122258981	GCCA	G	CTCF CTCF-Cohesin	29.484	-	EH38E2232049	chr3	122258830	122259088	dELS,CTCF-bound
G01-GEA337HI	Male	chr20	37202548	G	C	CTCF CTCF-Cohesin	29.2782	-	EH38E2110460	chr20	37202239	37202584	dELS,CTCF-bound
G01-GEA041HI	Female	chr5	14352275	G	C	CTCF CTCF-Cohesin	29.2627	-	EH38E2358329	chr5	14352194	14352397	dELS,CTCF-bound
G01-GEA132HI	Male	chr16	50210720	G	C	CTCF CTCF-Cohesin	29.0645	-	EH38E1814645	chr16	50210499	50210848	dELS,CTCF-bound
G01-GEA258HI	Female	chr8	47997423	G	C	CTCF CTCF-Cohesin	29.0507	-	EH38E2629214	chr8	47997311	47997512	dELS,CTCF-bound
G01-GEA111HI	Male	chr15	77659906	C	T	CTCF CTCF-Cohesin	29.0221	-	EH38E1779929	chr15	77659733	77660077	PLS,CTCF-bound
G01-GEA110HI	Female	chr10	88932841	C	T	CTCF CTCF-Cohesin	28.8492	-	EH38E1486760	chr10	88932588	88932925	PLS,CTCF-bound
G01-GEA158HI	Male	chr12	44931197	C	G	CTCF CTCF-Cohesin	28.624	-	EH38E1607105	chr12	44931056	44931323	dELS,CTCF-bound
2F867	Male	chr10	25227280	C	T	CTCF CTCF-Cohesin	28.5584	-	EH38E1456147	chr10	25227130	25227395	dELS,CTCF-bound
3C559	Male	chr18	54444517	G	A	CTCF CTCF-Cohesin	28.3885	-	EH38E1917853	chr18	54444338	54444685	dELS,CTCF-bound
G01-GEA288HI	Male	chr11	71580263	G	A	CTCF CTCF-Cohesin	28.3358	-	EH38E1550244	chr11	71580015	71580359	CTCF-only,CTCF-bound
2H163	Male	chr9	34437540	G	T	CTCF CTCF-Cohesin	28.2639	-	EH38E2691147	chr9	34437389	34437701	dELS,CTCF-bound
G01-GEA027HI	Male	chr4	82722004	ACTGGGGACAGTG	A	CTCF CTCF-Cohesin	28.2563	-	EH38E2308134	chr4	82721898	82722114	dELS,CTCF-bound
3C545	Male	chr12	11581366	C	G	CTCF CTCF-Cohesin	28.2143	-	EH38E1592728	chr12	11581220	11581524	dELS,CTCF-bound
4B710	Male	chr4	121370923	TG	T	CTCF CTCF-Cohesin	27.8237	-	EH38E2323955	chr4	121370856	121371013	CTCF-only,CTCF-bound
G01-GEA104HI	Male	chr19	41873338	G	A	CTCF CTCF-Cohesin	27.489	-	EH38E1955073	chr19	41873135	41873485	dELS,CTCF-bound
G01-GEA186HI	Female	chr6	108542186	C	T	CTCF CTCF-Cohesin	27.4306	-	EH38E2492133	chr6	108542069	108542416	dELS,CTCF-bound
4C200	Female	chr21	34890204	C	T	CTCF CTCF-Cohesin	27.0506	-	EH38E2139150	chr21	34890015	34890361	pELS,CTCF-bound
G01-GEA266HI	Male	chr3	172596295	C	T	CTCF CTCF-Cohesin	26.9041	-	EH38E2258563	chr3	172596114	172596439	pELS,CTCF-bound
4B691	Female	chr21	15483363	C	T	CTCF CTCF-Cohesin	26.847	-	EH38E2131184	chr21	15483163	15483509	dELS,CTCF-bound
G01-GEA104HI	Male	chr5	137075368	C	T	CTCF CTCF-Cohesin	26.825	-	EH38E2411735	chr5	137075185	137075532	dELS,CTCF-bound
G01-GEA026HI	Male	chr20	34069447	ACT	A	CTCF CTCF-Cohesin	26.705	-	EH38E2108174	chr20	34069265	34069609	dELS,CTCF-bound
3B336	Male	chr12	43445141	G	A	CTCF CTCF-Cohesin	26.2932	-	EH38E1606607	chr12	43444995	43445285	CTCF-only,CTCF-bound
3C139	Male	chr20	36836871	G	T	CTCF CTCF-Cohesin	26.2138	-	EH38E2110246	chr20	36836715	36837037	dELS,CTCF-bound
G01-GEA207HI	Male	chr2	218658755	G	T	CTCF CTCF-Cohesin	26.0311	-	EH38E2075530	chr2	218658631	218658947	pELS,CTCF-bound
3A671	Female	chr11	5600450	C	A	CTCF CTCF-Cohesin	25.9426	-	EH38E1517085	chr11	5600315	5600657	dELS,CTCF-bound
G01-GEA190HI	Male	chr20	51966513	C	T	CTCF CTCF-Cohesin	25.4486	-	EH38E2121262	chr20	51966335	51966685	dELS,CTCF-bound
3G089	Male	chr4	94596087	C	T	CTCF CTCF-Cohesin	25.4454	-	EH38E2313315	chr4	94595948	94596206	dELS,CTCF-bound
G01-GEA111HI	Male	chr1	211470250	G	A	CTCF CTCF-Cohesin	25.4321	-	EH38E1419529	chr1	211470008	211470322	dELS,CTCF-bound
G01-GEA090HI	Male	chr2	223798317	T	G	CTCF CTCF-Cohesin	25.3274	-	EH38E2078559	chr2	223798250	223798432	dELS,CTCF-bound
2F867	Male	chr1	25744294	C	T	CTCF CTCF-Cohesin	25.3138	-	EH38E1329829	chr1	25744146	25744492	dELS,CTCF-bound
G01-GEA284HI	Male	chr6	52087878	A	G	CTCF CTCF-Cohesin	24.827	-	EH38E2472765	chr6	52087574	52087908	PLS,CTCF-bound
5L790	Male	chr3	27312272	G	A	CTCF CTCF-Cohesin	24.8008	-	EH38E2187138	chr3	27312141	27312490	dELS,CTCF-bound
G01-GEA074HI	Male	chr1	1292027	C	T	CTCF CTCF-Cohesin	24.7855	-	EH38E1310726	chr1	1291826	1292171	dELS,CTCF-bound
3E468	Female	chr3	124351883	C	T	CTCF CTCF-Cohesin	24.5656	-	EH38E2233557	chr3	124351753	124352102	dELS,CTCF-bound
G01-GEA232HI	Male	chr12	26845257	G	T	CTCF CTCF-Cohesin	24.4807	-	EH38E1600680	chr12	26845143	26845341	dELS,CTCF-bound
4B693	Male	chr12	74317184	G	A	CTCF CTCF-Cohesin	24.4235	-	EH38E1624795	chr12	74317151	74317303	dELS,CTCF-bound
3D628	Male	chr1	1372237	T	G	CTCF CTCF-Cohesin	24.352	-	EH38E1310842	chr1	1372062	1372397	dELS,CTCF-bound
G01-GEA148HI	Female	chr19	480354	C	T	CTCF CTCF-Cohesin	24.301	-	EH38E1929988	chr19	480179	480446	dELS,CTCF-bound
4B716	Male	chr1	159936586	CCAG	C	CTCF CTCF-Cohesin	24.1988	-	EH38E1390019	chr1	159936542	159936887	dELS,CTCF-bound
3E475	Male	chr15	62254537	G	A	CTCF CTCF-Cohesin	24.1818	-	EH38E1767978	chr15	62254360	62254684	pELS,CTCF-bound
3E468	Female	chr17	57121523	A	G	CTCF CTCF-Cohesin	24.1105	-	EH38E1872876	chr17	57121464	57121665	dELS,CTCF-bound
3E466	Male	chr1	112718861	C	T	CTCF CTCF-Cohesin	23.9613	-	EH38E1377199	chr1	112718776	112719018	DNase-H3K4me3,CTCF-bound
G01-GEA143HI	Female	chr9	129790492	C	T	CTCF CTCF-Cohesin	23.741	-	EH38E2730862	chr9	129790351	129790694	DNase-H3K4me3,CTCF-bound
G01-GEA139HI	Male	chr20	61120825	TCTCCTG	T	CTCF CTCF-Cohesin	23.6749	-	EH38E2127125	chr20	61120642	61120991	dELS,CTCF-bound
3E468	Female	chr16	30894215	CCGCCCCCTTGGAGCGCCTGGACGCTCAG	C	CTCF CTCF-Cohesin	23.6229	-	EH38E1811804	chr16	30893984	30894334	PLS,CTCF-bound
G01-GEA027HI	Male	chr20	38073650	G	C	CTCF CTCF-Cohesin	23.6224	-	EH38E2111258	chr20	38073353	38073696	dELS,CTCF-bound
G01-GEA103HI	Male	chr14	31082182	C	T	CTCF CTCF-Cohesin	23.6071	-	EH38E1706053	chr14	31082001	31082338	DNase-H3K4me3,CTCF-bound
G01-GEA158HI	Male	chr9	33415591	C	G	CTCF CTCF-Cohesin	23.6048	-	EH38E2690547	chr9	33415525	33415875	dELS,CTCF-bound
G01-GEA209HI	Male	chr4	80335964	C	T	CTCF CTCF-Cohesin	23.5764	-	EH38E2307084	chr4	80335876	80336040	PLS,CTCF-bound
3C563	Male	chr12	51847076	G	A	CTCF CTCF-Cohesin	23.5349	+	EH38E1611937	chr12	51846860	51847182	pELS,CTCF-bound
3C139	Male	chr7	1579670	T	TG	CTCF CTCF-Cohesin	23.4693	-	EH38E2528707	chr7	1579604	1579834	CTCF-only,CTCF-bound
G01-GEA003HI	Male	chr16	8661134	A	G	CTCF CTCF-Cohesin	23.3287	-	EH38E1799995	chr16	8660976	8661321	DNase-H3K4me3,CTCF-bound
3D616	Female	chr6	133973576	G	A	CTCF CTCF-Cohesin	23.2865	-	EH38E2504764	chr6	133973389	133973736	dELS,CTCF-bound
G01-GEA090HI	Male	chr1	83931855	C	T	CTCF CTCF-Cohesin	23.178	-	EH38E1362891	chr1	83931689	83932028	dELS,CTCF-bound
2J788	Male	chr8	19014511	C	A	CTCF CTCF-Cohesin	23.0885	-	EH38E2614163	chr8	19014341	19014688	pELS,CTCF-bound
G01-GEA161HI	Male	chr6	106223516	C	G	CTCF CTCF-Cohesin	22.5904	-	EH38E2490589	chr6	106223315	106223665	dELS,CTCF-bound
G01-GEA173HI	Male	chr12	31238985	G	A	CTCF CTCF-Cohesin	22.5639	-	EH38E1602980	chr12	31238832	31239144	DNase-H3K4me3,CTCF-bound
2K890	Male	chr6	167908269	G	T	CTCF CTCF-Cohesin	22.4541	-	EH38E2525275	chr6	167908140	167908394	dELS,CTCF-bound
3E467	Female	chr3	41894183	A	AG	CTCF CTCF-Cohesin	22.3495	-	EH38E2194952	chr3	41894085	41894258	CTCF-only,CTCF-bound
2K890	Male	chr6	43773511	G	A	CTCF CTCF-Cohesin	22.3048	-	EH38E2468798	chr6	43773329	43773677	pELS,CTCF-bound
G01-GEA003HI	Male	chr6	99822913	G	A	CTCF CTCF-Cohesin	22.2134	-	EH38E2488250	chr6	99822701	99823042	dELS,CTCF-bound
G01-GEA208HI	Male	chr7	138886657	G	A	CTCF CTCF-Cohesin	22.1519	-	EH38E2595254	chr7	138886509	138886858	dELS,CTCF-bound
3E473	Male	chr14	53055090	C	T	CTCF CTCF-Cohesin	21.7708	-	EH38E1714595	chr14	53055012	53055179	dELS,CTCF-bound
G01-GEA136HI	Male	chr1	153627686	C	G	CTCF CTCF-Cohesin	21.2714	-	EH38E1385569	chr1	153627419	153627759	pELS,CTCF-bound
G01-GEA167HI	Male	chr11	116217200	A	C	CTCF CTCF-Cohesin	21.0866	-	EH38E1572402	chr11	116217086	116217345	CTCF-only,CTCF-bound
G01-GEA209HI	Male	chr12	66861344	T	G	CTCF CTCF-Cohesin	21.037	-	EH38E1621255	chr12	66861182	66861499	dELS,CTCF-bound
3C572	Male	chrX	129605617	C	T	CTCF CTCF-Cohesin	21.017	-	EH38E2767995	chrX	129605471	129605797	dELS,CTCF-bound
G01-GEA232HI	Male	chr12	95820296	C	T	CTCF CTCF-Cohesin	20.9723	-	EH38E1635240	chr12	95820188	95820386	CTCF-only,CTCF-bound
G01-GEA148HI	Female	chr10	89369692	G	T	CTCF CTCF-Cohesin	20.8698	-	EH38E1487132	chr10	89369582	89369806	dELS,CTCF-bound
4B716	Male	chr6	107980499	G	T	CTCF CTCF-Cohesin	20.6171	-	EH38E2491820	chr6	107980429	107980587	dELS,CTCF-bound
G01-GEA335HI	Male	chr20	59515826	C	A	CTCF CTCF-Cohesin	20.4827	-	EH38E2126291	chr20	59515627	59515974	DNase-H3K4me3,CTCF-bound
G01-GEA211HI	Male	chr16	58512084	G	A	CTCF CTCF-Cohesin	20.4735	-	EH38E1819765	chr16	58511928	58512277	dELS,CTCF-bound
G01-GEA143HI	Female	chr3	138068758	C	T	CTCF CTCF-Cohesin	20.1726	-	EH38E2241661	chr3	138068642	138068989	dELS,CTCF-bound
G01-GEA040HI	Male	chr5	150161802	C	T	CTCF CTCF-Cohesin	20.1723	-	EH38E2420679	chr5	150161620	150161947	dELS,CTCF-bound
3C563	Male	chr11	120172403	T	C	CTCF CTCF-Cohesin	20.1661	-	EH38E1575642	chr11	120172357	120172532	dELS,CTCF-bound
3D317	Female	chr8	93975335	G	A	CTCF CTCF-Cohesin	20.1128	-	EH38E2648130	chr8	93975157	93975503	CTCF-only,CTCF-bound
G01-GEA264HI	Male	chr9	71604654	C	T	CTCF CTCF-Cohesin	20.1079	-	EH38E2696278	chr9	71604522	71604804	dELS,CTCF-bound
2F730	Male	chr10	96375512	C	T	CTCF CTCF-Cohesin	20.0809	-	EH38E1491053	chr10	96375411	96375756	dELS,CTCF-bound
G01-GEA176HI	Male	chr4	16265023	A	G	CTCF CTCF-Cohesin	20.0332	-	EH38E2283697	chr4	16264822	16265167	CTCF-only,CTCF-bound
G01-GEA105HI	Male	chr19	46488020	G	GC	CTCF CTCF-Cohesin	19.8976	-	EH38E1958364	chr19	46487845	46488180	dELS,CTCF-bound
G01-GEA239HI	Male	chr6	99613569	T	C	CTCF CTCF-Cohesin	19.8407	-	EH38E2488211	chr6	99613480	99613681	dELS,CTCF-bound
G01-GEA334HI	Male	chr11	15819858	G	A	CTCF CTCF-Cohesin	19.8208	-	EH38E1523715	chr11	15819737	15820086	dELS,CTCF-bound
G01-GEA027HI	Male	chr6	2791366	A	G	CTCF CTCF-Cohesin	19.6883	-	EH38E2440041	chr6	2791136	2791483	dELS,CTCF-bound
3C565	Male	chr11	122863916	G	T	CTCF CTCF-Cohesin	19.4847	-	EH38E1577653	chr11	122863753	122864092	pELS,CTCF-bound
3C545	Male	chr15	31978018	C	A	CTCF CTCF-Cohesin	19.3826	-	EH38E1751222	chr15	31977823	31978172	DNase-H3K4me3,CTCF-bound
3E480	Male	chr10	30392682	G	A	CTCF CTCF-Cohesin	19.2692	-	EH38E1458989	chr10	30392526	30392875	DNase-H3K4me3,CTCF-bound
G01-GEA218HI	Male	chr2	185739022	CCCTCT	C	CTCF CTCF-Cohesin	19.1819	-	EH38E2058481	chr2	185738868	185739211	PLS,CTCF-bound
G01-GEA258HI	Female	chr2	121531092	G	A	CTCF CTCF-Cohesin	19.1562	-	EH38E2029391	chr2	121530900	121531247	PLS,CTCF-bound
3C554	Male	chr2	204325587	C	T	CTCF CTCF-Cohesin	19.1121	-	EH38E2067875	chr2	204325423	204325767	CTCF-only,CTCF-bound
3C139	Male	chr11	7892961	T	C	CTCF CTCF-Cohesin	19.0882	-	EH38E1518118	chr11	7892799	7893149	dELS,CTCF-bound
G01-GEA074HI	Male	chr1	235417295	G	A	CTCF CTCF-Cohesin	19.0678	-	EH38E1434303	chr1	235417043	235417375	dELS,CTCF-bound
G01-GEA186HI	Female	chr8	26046688	T	C	CTCF CTCF-Cohesin	18.8763	-	EH38E2618709	chr8	26046575	26046846	pELS,CTCF-bound
3D628	Male	chr2	218292605	G	T	CTCF CTCF-Cohesin	18.8548	-	EH38E2075278	chr2	218292406	218292745	PLS,CTCF-bound
3C142	Female	chr8	73673175	C	T	CTCF CTCF-Cohesin	18.8382	-	EH38E2640445	chr8	73673068	73673348	dELS,CTCF-bound
G01-GEA249HI	Male	chr17	75060172	C	T	CTCF CTCF-Cohesin	18.6635	-	EH38E1885539	chr17	75059882	75060191	pELS,CTCF-bound
3E473	Male	chr20	4249699	A	T	CTCF CTCF-Cohesin	18.5243	-	EH38E2094172	chr20	4249518	4249866	pELS,CTCF-bound
G01-GEA139HI	Male	chr20	45362971	G	A	CTCF CTCF-Cohesin	18.3474	-	EH38E2115508	chr20	45362969	45363316	PLS,CTCF-bound
3C554	Male	chr12	71938953	C	G	CTCF CTCF-Cohesin	18.3146	-	EH38E1624271	chr12	71938743	71939092	PLS,CTCF-bound
G01-GEA217HI	Male	chr3	149530849	AG	A	CTCF CTCF-Cohesin	18.2805	-	EH38E2247298	chr3	149530758	149530922	dELS,CTCF-bound
G01-GEA139HI	Male	chr9	76403480	A	G	CTCF CTCF-Cohesin	18.2125	+	EH38E2698514	chr9	76403380	76403710	dELS,CTCF-bound
G01-GEA149HI	Male	chr3	14439662	TGCCAAGGAAAACA	T	E4 Multi-tissue	18.1022	-	EH38E2180869	chr3	14439525	14439864	dELS,CTCF-bound
3B479	Male	chr2	237475597	G	A	CTCF CTCF-Cohesin	17.9553	-	EH38E2087376	chr2	237475319	237475669	dELS,CTCF-bound
G01-GEA065HI	Male	chr7	79177046	ACTGAAG	A	CTCF CTCF-Cohesin	17.9093	-	EH38E2566019	chr7	79176909	79177195	DNase-H3K4me3,CTCF-bound
3C572	Male	chr15	68155156	G	A	CTCF CTCF-Cohesin	17.8183	-	EH38E1772881	chr15	68154978	68155282	dELS,CTCF-bound
G01-GEA149HI	Male	chr5	138032842	G	C	CTCF CTCF-Cohesin	17.6562	+	EH38E2412334	chr5	138032635	138032888	PLS,CTCF-bound
G01-GEA154HI	Male	chr16	67160178	C	A	CTCF CTCF-Cohesin	17.656	-	EH38E1822670	chr16	67160146	67160469	PLS,CTCF-bound
5G257	Male	chr1	235093469	C	T	CTCF CTCF-Cohesin	17.6043	-	EH38E1434091	chr1	235093385	235093541	dELS,CTCF-bound
3B571	Female	chr13	37870449	G	A	CTCF CTCF-Cohesin	17.5904	-	EH38E1668815	chr13	37870274	37870613	PLS,CTCF-bound
G01-GEA114HI	Male	chr5	103587355	C	G	CTCF CTCF-Cohesin	17.5798	-	EH38E2395600	chr5	103587274	103587475	CTCF-only,CTCF-bound
G01-GEA241HI	Male	chr6	25070956	G	T	CTCF CTCF-Cohesin	17.4418	-	EH38E2454990	chr6	25070755	25071095	dELS,CTCF-bound
5F620	Male	chr15	70098043	CTT	C	CTCF CTCF-Cohesin	17.413	-	EH38E1774491	chr15	70097803	70098149	PLS,CTCF-bound
G01-GEA185HI	Female	chr20	6178724	C	A	CTCF CTCF-Cohesin	17.386	-	EH38E2095412	chr20	6178605	6178862	CTCF-only,CTCF-bound
G01-GEA065HI	Male	chr10	11758103	C	T	CTCF CTCF-Cohesin	17.3591	-	EH38E1448348	chr10	11758078	11758371	dELS,CTCF-bound
3D628	Male	chr8	119767943	G	A	CTCF CTCF-Cohesin	17.3356	-	EH38E2660641	chr8	119767699	119768049	dELS,CTCF-bound
G01-GEA074HI	Male	chr1	25247927	G	A	CTCF CTCF-Cohesin	17.2865	-	EH38E1329418	chr1	25247771	25247951	PLS,CTCF-bound
G01-GEA003HI	Male	chr6	28124477	C	G	CTCF CTCF-Cohesin	17.2848	+	EH38E2457069	chr6	28124412	28124758	PLS,CTCF-bound
G01-GEA211HI	Male	chr10	5442255	G	A	CTCF CTCF-Cohesin	17.2044	-	EH38E1444326	chr10	5442090	5442434	dELS,CTCF-bound
G01-GEA278HI	Male	chr4	141346339	C	T	CTCF CTCF-Cohesin	16.9613	-	EH38E2331250	chr4	141346263	141346546	dELS,CTCF-bound
G01-GEA224HI	Female	chr19	29760265	C	T	CTCF CTCF-Cohesin	16.9315	-	EH38E1947854	chr19	29760116	29760455	DNase-H3K4me3,CTCF-bound
4B713	Male	chr16	85750321	G	A	CTCF CTCF-Cohesin	16.9162	+	EH38E1834750	chr16	85750202	85750547	pELS,CTCF-bound
3D632	Male	chr14	22471700	C	T	CTCF CTCF-Cohesin	16.7925	-	EH38E1702220	chr14	22471570	22471884	dELS,CTCF-bound
G01-GEA028HI	Male	chr12	93571634	G	A	CTCF CTCF-Cohesin	16.6414	-	EH38E1633547	chr12	93571493	93571840	PLS,CTCF-bound
G01-GEA003HI	Male	chr1	209602243	C	T	CTCF CTCF-Cohesin	16.625	-	EH38E1418475	chr1	209602195	209602348	CTCF-only,CTCF-bound
G01-GEA045HI	Male	chr10	61751124	G	A	CTCF CTCF-Cohesin	16.5635	-	EH38E1471712	chr10	61750965	61751312	dELS,CTCF-bound
G01-GEA229HI	Male	chr13	40777638	A	G	CTCF CTCF-Cohesin	16.5308	-	EH38E1670391	chr13	40777552	40777720	dELS,CTCF-bound
3C562	Male	chr11	129992575	G	A	CTCF CTCF-Cohesin	16.523	-	EH38E1582138	chr11	129992394	129992743	dELS,CTCF-bound
G01-GEA251HI	Male	chr3	52534030	CGGCGATGGCGGCGCCTTTCCCT	C	CTCF CTCF-Cohesin	16.5204	-	EH38E2202467	chr3	52533781	52534106	PLS,CTCF-bound
5G257	Male	chr3	154335117	C	T	CTCF CTCF-Cohesin	16.4178	-	EH38E2250305	chr3	154334991	154335165	CTCF-only,CTCF-bound
G01-GEA195HI	Male	chr4	10089637	C	T	CTCF CTCF-Cohesin	16.4119	-	EH38E2280726	chr4	10089318	10089663	dELS,CTCF-bound
G01-GEA264HI	Male	chr17	61399738	C	T	CTCF CTCF-Cohesin	16.3755	+	EH38E1876130	chr17	61399575	61399915	PLS,CTCF-bound
G01-GEA161HI	Male	chr5	141914252	GC	G	CTCF CTCF-Cohesin	16.3549	-	EH38E2415173	chr5	141914198	141914349	dELS,CTCF-bound
3C546	Male	chr3	184242042	C	A	CTCF CTCF-Cohesin	16.2869	-	EH38E2264262	chr3	184241829	184242179	pELS,CTCF-bound
G01-GEA251HI	Male	chr12	55956262	A	C	E4 Multi-tissue	16.2777	-	EH38E1615326	chr12	55956117	55956450	dELS,CTCF-bound
5L790	Male	chr3	27312271	A	T	CTCF CTCF-Cohesin	16.1297	-	EH38E2187138	chr3	27312141	27312490	dELS,CTCF-bound
G01-GEA065HI	Male	chr1	34681669	C	T	CTCF CTCF-Cohesin	16.08	-	EH38E1336405	chr1	34681540	34681816	CTCF-only,CTCF-bound
G01-GEA310HI	Male	chr2	1855003	G	C	CTCF CTCF-Cohesin	16.0126	-	EH38E1967615	chr2	1854825	1855171	dELS,CTCF-bound
G01-GEA269HI	Male	chr6	99822915	T	C	CTCF CTCF-Cohesin	15.942	-	EH38E2488250	chr6	99822701	99823042	dELS,CTCF-bound
G01-GEA285HI	Male	chr17	48878352	G	A	CTCF CTCF-Cohesin	15.7929	+	EH38E1868497	chr17	48878219	48878464	CTCF-only,CTCF-bound
4B699	Male	chr18	49042098	C	G	CTCF CTCF-Cohesin	15.7788	-	EH38E1915610	chr18	49042019	49042238	dELS,CTCF-bound
5F620	Male	chr5	180209220	G	GC	CTCF CTCF-Cohesin	15.7388	-	EH38E2437437	chr5	180209056	180209351	PLS,CTCF-bound
4B716	Male	chr8	21922162	C	G	CTCF CTCF-Cohesin	15.7034	+	EH38E2615889	chr8	21922023	21922368	dELS,CTCF-bound
G01-GEA281HI	Male	chr10	133257695	G	A	CTCF CTCF-Cohesin	15.6708	-	EH38E1513014	chr10	133257477	133257827	PLS,CTCF-bound
G01-GEA285HI	Male	chr8	37851619	G	A	CTCF CTCF-Cohesin	15.5268	-	EH38E2624988	chr8	37851501	37851749	pELS,CTCF-bound
G01-GEA045HI	Male	chr16	1863816	C	G	CTCF CTCF-Cohesin	15.4881	-	EH38E1796099	chr16	1863745	1863977	DNase-H3K4me3,CTCF-bound
G01-GEA139HI	Male	chr2	85285645	C	T	CTCF CTCF-Cohesin	15.3874	-	EH38E2013592	chr2	85285460	85285804	dELS,CTCF-bound
G01-GEA271HI	Male	chr10	97025822	G	A	CTCF CTCF-Cohesin	15.3399	-	EH38E1491509	chr10	97025694	97025941	dELS,CTCF-bound
G01-GEA283HI	Male	chr1	156194064	G	A	CTCF CTCF-Cohesin	15.2279	-	EH38E1387766	chr1	156193813	156194163	PLS,CTCF-bound
G01-GEA154HI	Male	chr22	20507891	C	T	CTCF CTCF-Cohesin	15.2002	+	EH38E2150668	chr22	20507865	20508116	pELS,CTCF-bound
G01-GEA015HI	Male	chr7	81499826	C	T	CTCF CTCF-Cohesin	15.1057	-	EH38E2567267	chr7	81499562	81499904	dELS,CTCF-bound
G01-GEA101HI	Male	chr1	58899160	C	T	E12 Erythroblast-like	15.0784	-	EH38E1351734	chr1	58898963	58899310	dELS,CTCF-bound
G01-GEA288HI	Male	chr14	52730627	C	G	CTCF CTCF-Cohesin	15.0648	+	EH38E1714370	chr14	52730594	52730749	pELS,CTCF-bound
4B696	Male	chr6	99119628	C	T	CTCF CTCF-Cohesin	15.0562	-	EH38E2488006	chr6	99119407	99119757	dELS,CTCF-bound
G01-GEA292HI	Male	chr2	203650859	A	G	CTCF CTCF-Cohesin	15.0204	+	EH38E2067357	chr2	203650793	203651069	dELS,CTCF-bound
G01-GEA096HI	Male	chr3	82133185	C	A	CTCF CTCF-Cohesin	14.8201	-	EH38E2217735	chr3	82133041	82133304	dELS,CTCF-bound
3C573	Male	chr15	51621999	G	A	CTCF CTCF-Cohesin	14.7872	-	EH38E1761988	chr15	51621925	51622075	pELS,CTCF-bound
G01-GEA295HI	Male	chr1	161020775	T	G	CTCF CTCF-Cohesin	14.7549	-	EH38E1390973	chr1	161020707	161021006	pELS,CTCF-bound
5L790	Male	chr5	138133631	C	A	CTCF CTCF-Cohesin	14.7382	-	EH38E2412386	chr5	138133463	138133798	dELS,CTCF-bound
3E480	Male	chr4	7719762	G	T	CTCF CTCF-Cohesin	14.6757	-	EH38E2279308	chr4	7719586	7719921	DNase-H3K4me3,CTCF-bound
G01-GEA140HI	Male	chr2	236168342	G	T	CTCF CTCF-Cohesin	14.6568	+	EH38E2086317	chr2	236168311	236168627	PLS,CTCF-bound
3C565	Male	chr4	175892122	C	T	CTCF CTCF-Cohesin	14.5256	-	EH38E2345613	chr4	175891800	175892150	dELS,CTCF-bound
4B693	Male	chr16	88505672	C	T	CTCF CTCF-Cohesin	14.5246	-	EH38E1837107	chr16	88505413	88505763	dELS,CTCF-bound
G01-GEA012HI	Female	chr3	8607719	C	T	CTCF CTCF-Cohesin	14.4091	+	EH38E2176550	chr3	8607501	8607850	dELS,CTCF-bound
G01-GEA163HI	Male	chr11	72414345	G	A	CTCF CTCF-Cohesin	14.3541	-	EH38E1550757	chr11	72414188	72414537	dELS,CTCF-bound
G01-GEA176HI	Male	chr7	149883584	C	T	CTCF CTCF-Cohesin	14.26	-	EH38E2600358	chr7	149883413	149883727	pELS,CTCF-bound
3E473	Male	chr12	120225162	A	AG	CTCF CTCF-Cohesin	14.158	+	EH38E1649728	chr12	120224962	120225163	pELS,CTCF-bound
G01-GEA334HI	Male	chr10	28939435	G	A	CTCF CTCF-Cohesin	14.1326	-	EH38E1457896	chr10	28939385	28939724	dELS,CTCF-bound
G01-GEA278HI	Male	chr20	35092862	C	G	CTCF CTCF-Cohesin	14.1009	-	EH38E2108920	chr20	35092695	35093045	PLS,CTCF-bound
3C544	Female	chr9	128686229	GCTTTCT	G	PC3 Polycomb	14.1002	+	EH38E2729771	chr9	128686102	128686311	pELS,CTCF-bound
G01-GEA249HI	Male	chr3	96814037	C	T	CTCF CTCF-Cohesin	13.9467	-	EH38E2220123	chr3	96813887	96814237	pELS,CTCF-bound
3C575	Male	chr9	116365374	G	A	E4 Multi-tissue	13.9419	-	EH38E2721601	chr9	116365235	116365539	dELS,CTCF-bound
G01-GEA305HI	Male	chr1	10530461	T	C	CTCF CTCF-Cohesin	13.9255	+	EH38E1318073	chr1	10530396	10530550	dELS,CTCF-bound
3E467	Female	chr7	92833970	G	C	CTCF CTCF-Cohesin	13.8323	-	EH38E2571767	chr7	92833828	92834176	PLS,CTCF-bound
G01-GEA152HI	Male	chr12	110888189	G	C	CTCF CTCF-Cohesin	13.7398	-	EH38E1644161	chr12	110888003	110888353	dELS,CTCF-bound
G01-GEA211HI	Male	chr7	2555975	TGCCTGTAATTCCA	T	CTCF CTCF-Cohesin	13.7083	+	EH38E2529685	chr7	2555675	2556023	PLS,CTCF-bound
G01-GEA143HI	Female	chr1	201309683	G	A	CTCF CTCF-Cohesin	13.6944	-	EH38E1411513	chr1	201309435	201309780	dELS,CTCF-bound
G01-GEA307HI	Female	chr17	32111541	C	T	CTCF CTCF-Cohesin	13.6007	-	EH38E1856558	chr17	32111453	32111799	pELS,CTCF-bound
G01-GEA180HI	Male	chr9	764213	A	G	CTCF CTCF-Cohesin	13.5033	-	EH38E2677266	chr9	764068	764416	dELS,CTCF-bound
3C554	Male	chr18	45723088	G	A	CTCF CTCF-Cohesin	13.4949	+	EH38E1913375	chr18	45722932	45723279	DNase-H3K4me3,CTCF-bound
3B331	Male	chr17	58631720	CTATCCCACTCGTGAGAGAACACAAA	C	CTCF CTCF-Cohesin	13.4849	-	EH38E1874285	chr17	58631560	58631908	PLS,CTCF-bound
3C560	Male	chr2	11693087	C	T	CTCF CTCF-Cohesin	13.4743	-	EH38E1973734	chr2	11693047	11693383	dELS,CTCF-bound
G01-GEA103HI	Male	chr11	122505922	ATGGT	A	CTCF CTCF-Cohesin	13.3554	-	EH38E1577351	chr11	122505597	122505943	dELS,CTCF-bound
G01-GEA220HI	Male	chr1	27388583	A	G	CTCF CTCF-Cohesin	13.2518	-	EH38E1331320	chr1	27388422	27388766	pELS,CTCF-bound
G01-GEA129HI	Male	chr4	56800341	T	C	CTCF CTCF-Cohesin	13.2323	-	EH38E2298852	chr4	56800138	56800480	dELS,CTCF-bound
G01-GEA024HI	Female	chr12	119667733	G	GC	CTCF CTCF-Cohesin	13.1413	-	EH38E1649354	chr12	119667707	119668057	PLS,CTCF-bound
G01-GEA214HI	Male	chr1	115642222	G	T	CTCF CTCF-Cohesin	13.1281	+	EH38E1378909	chr1	115642027	115642357	pELS,CTCF-bound
4B848	Male	chr22	45096443	C	G	CTCF CTCF-Cohesin	13.1248	-	EH38E2169208	chr22	45096296	45096613	CTCF-only,CTCF-bound
G01-GEA327HI	Male	chr1	207024489	C	T	E12 Erythroblast-like	13.1232	-	EH38E1416723	chr1	207024340	207024690	dELS,CTCF-bound
XH678	Male	chr1	10210353	G	C	CTCF CTCF-Cohesin	13.0569	-	EH38E1317823	chr1	10210271	10210621	pELS,CTCF-bound
3C559	Male	chr17	38867636	A	C	CTCF CTCF-Cohesin	12.997	-	EH38E1860404	chr17	38867488	38867829	dELS,CTCF-bound
3D317	Female	chr3	33440080	C	G	CTCF CTCF-Cohesin	12.9923	+	EH38E2190802	chr3	33440035	33440208	PLS,CTCF-bound
G01-GEA232HI	Male	chr19	17391226	G	A	CTCF CTCF-Cohesin	12.9604	-	EH38E1943374	chr19	17391038	17391387	pELS,CTCF-bound
G01-GEA219HI	Male	chr19	1180713	C	A	E4 Multi-tissue	12.9463	-	EH38E1930929	chr19	1180498	1180847	dELS,CTCF-bound
G01-GEA118HI	Female	chr2	676208	G	A	CTCF CTCF-Cohesin	12.9331	+	EH38E1966899	chr2	676110	676455	PLS,CTCF-bound
G01-GEA032HI	Female	chr22	30695013	C	T	CTCF CTCF-Cohesin	12.9132	+	EH38E2158077	chr22	30694732	30695075	PLS,CTCF-bound
G01-GEA334HI	Male	chr1	151281311	G	C	CTCF CTCF-Cohesin	12.8678	-	EH38E1384191	chr1	151281287	151281637	pELS,CTCF-bound
G01-GEA167HI	Male	chr11	59755823	A	T	E4 Multi-tissue	12.7965	-	EH38E1540602	chr11	59755784	59756010	pELS,CTCF-bound
3C545	Male	chr2	96816265	G	T	CTCF CTCF-Cohesin	12.7713	-	EH38E2016921	chr2	96816033	96816383	PLS,CTCF-bound
G01-GEA209HI	Male	chr12	104215742	G	T	CTCF CTCF-Cohesin	12.7506	-	EH38E1639217	chr12	104215584	104215929	PLS,CTCF-bound
2K890	Male	chr14	77800536	T	C	CTCF CTCF-Cohesin	12.719	-	EH38E1730424	chr14	77800301	77800597	pELS,CTCF-bound
G01-GEA258HI	Female	chr17	7615030	C	A	CTCF CTCF-Cohesin	12.5746	-	EH38E1844553	chr17	7614963	7615309	pELS,CTCF-bound
4B693	Male	chr13	22926493	G	A	CTCF CTCF-Cohesin	12.5618	+	EH38E1659866	chr13	22926280	22926629	dELS,CTCF-bound
G01-GEA169HI	Male	chr21	45152488	C	G	CTCF CTCF-Cohesin	12.4842	-	EH38E2146785	chr21	45152270	45152616	dELS,CTCF-bound
G01-GEA176HI	Male	chr8	27614862	T	TGGGGGCGCCG	CTCF CTCF-Cohesin	12.404	-	EH38E2619771	chr8	27614645	27614991	pELS,CTCF-bound
G01-GEA176HI	Male	chr5	169980789	C	T	CTCF CTCF-Cohesin	12.3874	-	EH38E2430374	chr5	169980637	169980843	PLS,CTCF-bound
G01-GEA105HI	Male	chr11	1262739	CCGCCTCCTGTCCCGCCTCCTGTCCCGCCTCCTGTCG	C	P Promoter	12.3095	-	EH38E1514383	chr11	1262584	1262932	dELS,CTCF-bound
G01-GEA124HI	Male	chr3	64484600	G	C	CTCF CTCF-Cohesin	12.2527	-	EH38E2209593	chr3	64484421	64484759	dELS,CTCF-bound
G01-GEA023HI	Male	chr19	48675572	C	A	CTCF CTCF-Cohesin	12.2511	-	EH38E1960196	chr19	48675381	48675721	dELS,CTCF-bound
G01-GEA292HI	Male	chr2	86393873	A	C	E4 Multi-tissue	12.1732	-	EH38E2014631	chr2	86393660	86394010	dELS,CTCF-bound
G01-GEA263HI	Female	chr14	81990463	G	A	CTCF CTCF-Cohesin	12.1665	-	EH38E1732098	chr14	81990318	81990621	dELS,CTCF-bound
G01-GEA012HI	Female	chr7	95545173	C	A	CTCF CTCF-Cohesin	12.1652	-	EH38E2573115	chr7	95545059	95545269	dELS,CTCF-bound
G01-GEA096HI	Male	chr20	48620661	C	A	CTCF CTCF-Cohesin	12.1546	-	EH38E2117983	chr20	48620476	48620825	dELS,CTCF-bound
G01-GEA105HI	Male	chr14	99995932	T	C	CTCF CTCF-Cohesin	12.1392	+	EH38E1741926	chr14	99995740	99996079	dELS,CTCF-bound
G01-GEA163HI	Male	chr17	62968672	C	CT	CTCF CTCF-Cohesin	12.0639	-	EH38E1877115	chr17	62968473	62968813	PLS,CTCF-bound
G01-GEA147HI	Male	chr11	45146209	G	C	CTCF CTCF-Cohesin	11.9837	+	EH38E1536497	chr11	45146104	45146319	pELS,CTCF-bound
G01-GEA313HI	Male	chr20	38962717	C	T	CTCF CTCF-Cohesin	11.9533	-	EH38E2111989	chr20	38962487	38962780	PLS,CTCF-bound
G01-GEA114HI	Male	chr2	150486226	C	CGCGTCGCCTCTGG	CTCF CTCF-Cohesin	11.9429	+	EH38E2040964	chr2	150486104	150486431	pELS,CTCF-bound
G01-GEA182HI	Male	chr9	35259041	G	A	CTCF CTCF-Cohesin	11.8933	+	EH38E2691657	chr9	35258883	35259172	dELS,CTCF-bound
3C563	Male	chr5	150541074	A	G	E4 Multi-tissue	11.8807	-	EH38E2421123	chr5	150540958	150541298	dELS,CTCF-bound
G01-GEA283HI	Male	chr17	82231075	A	G	CTCF CTCF-Cohesin	11.8772	-	EH38E1893156	chr17	82230868	82231212	pELS,CTCF-bound
G01-GEA262HI	Female	chr14	74612771	G	A	CTCF CTCF-Cohesin	11.8714	-	EH38E1727950	chr14	74612541	74612891	pELS,CTCF-bound
3C145	Female	chr2	165953364	C	A	CTCF CTCF-Cohesin	11.8678	+	EH38E2048308	chr2	165953281	165953553	pELS,CTCF-bound
G01-GEA207HI	Male	chr1	33431066	C	T	CTCF CTCF-Cohesin	11.8453	-	EH38E1336002	chr1	33430926	33431275	dELS,CTCF-bound
G01-GEA023HI	Male	chr14	54348198	T	C	CTCF CTCF-Cohesin	11.7987	-	EH38E1715259	chr14	54348019	54348365	dELS,CTCF-bound
3B479	Male	chr14	105398617	G	A	CTCF CTCF-Cohesin	11.7441	-	EH38E1746744	chr14	105398317	105398655	PLS,CTCF-bound
3D317	Female	chr15	64740685	G	C	CTCF CTCF-Cohesin	11.729	-	EH38E1770155	chr15	64740459	64740793	dELS,CTCF-bound
4B713	Male	chr6	33711840	G	A	CTCF CTCF-Cohesin	11.6892	-	EH38E2460910	chr6	33711585	33711927	PLS,CTCF-bound
G01-GEA220HI	Male	chr14	64465496	T	C	CTCF CTCF-Cohesin	11.6811	+	EH38E1721112	chr14	64465254	64465601	PLS,CTCF-bound
G01-GEA248HI	Male	chr2	149329862	G	C	CTCF CTCF-Cohesin	11.6648	-	EH38E2040316	chr2	149329687	149329893	PLS,CTCF-bound
5L790	Male	chr1	44739649	CCA	C	CTCF CTCF-Cohesin	11.5397	+	EH38E1343618	chr1	44739546	44739896	PLS,CTCF-bound
G01-GEA190HI	Male	chr19	57579066	AGCGGCCCGCGGAG	A	CTCF CTCF-Cohesin	11.4858	-	EH38E1965908	chr19	57578843	57579193	PLS,CTCF-bound
G01-GEA239HI	Male	chr11	62556733	TGACTCACTCTTCCTGCAGGCAGAGGAA	T	E4 Multi-tissue	11.4756	-	EH38E1542669	chr11	62556516	62556859	dELS,CTCF-bound
G01-GEA206HI	Male	chr9	136539928	C	T	E4 Multi-tissue	11.4716	-	EH38E2736777	chr9	136539693	136540030	dELS,CTCF-bound
G01-GEA218HI	Male	chr11	112555901	T	C	CTCF CTCF-Cohesin	11.4695	-	EH38E1570100	chr11	112555735	112556052	CTCF-only,CTCF-bound
G01-GEA090HI	Male	chr20	25000351	G	A	TF3 FOXA1 / AR / ESR1	11.4329	-	EH38E2105113	chr20	25000326	25000676	dELS,CTCF-bound
G01-GEA003HI	Male	chr22	42296736	A	T	CTCF CTCF-Cohesin	11.4241	+	EH38E2167033	chr22	42296434	42296769	dELS,CTCF-bound
G01-GEA038HI	Male	chr22	50628109	G	A	CTCF CTCF-Cohesin	11.3871	-	EH38E2173319	chr22	50628069	50628417	PLS,CTCF-bound
G01-GEA278HI	Male	chr16	77212623	G	T	CTCF CTCF-Cohesin	11.3654	+	EH38E1828839	chr16	77212532	77212698	dELS,CTCF-bound
3G089	Male	chr12	5648942	T	G	CTCF CTCF-Cohesin	11.2499	-	EH38E1589320	chr12	5648751	5649060	CTCF-only,CTCF-bound
G01-GEA140HI	Male	chr2	36357784	C	T	CTCF CTCF-Cohesin	11.1874	+	EH38E1987421	chr2	36357591	36357792	pELS,CTCF-bound
G01-GEA118HI	Female	chr18	48412564	G	A	CTCF CTCF-Cohesin	11.0909	-	EH38E1914868	chr18	48412394	48412671	CTCF-only,CTCF-bound
G01-GEA207HI	Male	chr2	111887906	G	T	CTCF CTCF-Cohesin	11.0627	-	EH38E2024977	chr2	111887801	111888128	pELS,CTCF-bound
G01-GEA124HI	Male	chr15	89496433	C	T	CTCF CTCF-Cohesin	11.0074	-	EH38E1786748	chr15	89496261	89496569	PLS,CTCF-bound
G01-GEA217HI	Male	chr7	113118644	T	C	CTCF CTCF-Cohesin	10.9919	+	EH38E2582584	chr7	113118445	113118795	PLS,CTCF-bound
3B479	Male	chr4	62709838	G	T	CTCF CTCF-Cohesin	10.9853	-	EH38E2300188	chr4	62709752	62709930	dELS,CTCF-bound
G01-GEA289HI	Female	chr6	36840033	C	T	CTCF CTCF-Cohesin	10.9843	-	EH38E2463637	chr6	36839928	36840191	PLS,CTCF-bound
5L790	Male	chr19	5720692	C	G	CTCF CTCF-Cohesin	10.9724	-	EH38E1935247	chr19	5720489	5720738	PLS,CTCF-bound
G01-GEA003HI	Male	chr13	33285908	C	G	CTCF CTCF-Cohesin	10.9231	+	EH38E1666446	chr13	33285671	33286016	PLS,CTCF-bound
G01-GEA041HI	Female	chr1	39133258	C	T	CTCF CTCF-Cohesin	10.89	-	EH38E1339144	chr1	39132996	39133345	dELS,CTCF-bound
G01-GEA260HI	Male	chr2	234881891	C	T	CTCF CTCF-Cohesin	10.8591	-	EH38E2085381	chr2	234881687	234882035	dELS,CTCF-bound
G01-GEA271HI	Male	chr1	167721140	C	T	CTCF CTCF-Cohesin	10.8513	+	EH38E1394929	chr1	167721065	167721289	pELS,CTCF-bound
3D615	Male	chr15	73871268	C	T	E12 Erythroblast-like	10.819	-	EH38E1777097	chr15	73871087	73871430	dELS,CTCF-bound
3B334	Female	chr3	72888456	C	CCGCG	CTCF CTCF-Cohesin	10.8036	+	EH38E2214593	chr3	72888222	72888480	pELS,CTCF-bound
G01-GEA285HI	Male	chr1	22025494	GGCGGGGCATGACTTCCGGTTCCCGC	G	P Promoter	10.7865	-	EH38E1326684	chr1	22025308	22025571	PLS,CTCF-bound
3C567	Male	chr10	44959941	A	G	CTCF CTCF-Cohesin	10.7762	+	EH38E1464876	chr10	44959798	44960050	PLS,CTCF-bound
G01-GEA161HI	Male	chr5	45521277	T	C	CTCF CTCF-Cohesin	10.7662	+	EH38E2370210	chr5	45521135	45521407	dELS,CTCF-bound
G01-GEA217HI	Male	chr13	98485047	T	C	CTCF CTCF-Cohesin	10.7498	+	EH38E1691659	chr13	98484879	98485229	dELS,CTCF-bound
G01-GEA229HI	Male	chr2	96819420	G	A	CTCF CTCF-Cohesin	10.7433	+	EH38E2016930	chr2	96819240	96819590	dELS,CTCF-bound
G01-GEA129HI	Male	chr19	10505776	G	C	CTCF CTCF-Cohesin	10.6954	-	EH38E1938360	chr19	10505698	10505899	dELS,CTCF-bound
3B571	Female	chr16	19410709	G	A	CTCF CTCF-Cohesin	10.6954	+	EH38E1805876	chr16	19410475	19410824	PLS,CTCF-bound
G01-GEA262HI	Female	chr10	14960158	C	T	CTCF CTCF-Cohesin	10.6542	-	EH38E1450600	chr10	14959869	14960217	pELS,CTCF-bound
G01-GEA003HI	Male	chr18	61894406	C	G	CTCF CTCF-Cohesin	10.6514	-	EH38E1922196	chr18	61894274	61894618	pELS,CTCF-bound
G01-GEA288HI	Male	chr3	65412829	C	G	CTCF CTCF-Cohesin	10.6092	-	EH38E2210169	chr3	65412591	65412939	dELS,CTCF-bound
5L790	Male	chr13	43317216	G	A	E4 Multi-tissue	10.6074	-	EH38E1671973	chr13	43317027	43317377	dELS
3C562	Male	chr19	53866366	C	T	CTCF CTCF-Cohesin	10.5791	-	EH38E1963756	chr19	53866231	53866450	PLS,CTCF-bound
G01-GEA186HI	Female	chr9	97984493	G	C	E4 Multi-tissue	10.5749	+	EH38E2711216	chr9	97984493	97984653	pELS,CTCF-bound
2F867	Male	chr19	14505609	G	A	CTCF CTCF-Cohesin	10.5131	-	EH38E1941388	chr19	14505532	14505692	dELS,CTCF-bound
G01-GEA264HI	Male	chr10	43138131	C	T	CTCF CTCF-Cohesin	10.5064	-	EH38E1463748	chr10	43138000	43138194	pELS,CTCF-bound
G01-GEA337HI	Male	chr7	1170063	G	C	CTCF CTCF-Cohesin	10.5017	-	EH38E2528328	chr7	1169851	1170199	dELS,CTCF-bound
G01-GEA309HI	Male	chr17	57875620	C	CTT	CTCF CTCF-Cohesin	10.4935	-	EH38E1873643	chr17	57875356	57875677	dELS,CTCF-bound
4B702	Male	chr11	2527301	G	C	CTCF CTCF-Cohesin	10.4555	+	EH38E1515461	chr11	2527055	2527405	dELS,CTCF-bound
G01-GEA160HI	Male	chr7	69565008	C	A	CTCF CTCF-Cohesin	10.4498	-	EH38E2561243	chr7	69564856	69565206	dELS,CTCF-bound
3C139	Male	chr9	136792018	C	T	CTCF CTCF-Cohesin	10.4386	-	EH38E2737151	chr9	136791679	136792027	pELS,CTCF-bound
G01-GEA143HI	Female	chr1	2642746	C	A	CTCF CTCF-Cohesin	10.4257	-	EH38E1312163	chr1	2642487	2642835	dELS,CTCF-bound
G01-GEA053HI	Female	chr11	58788605	C	T	CTCF CTCF-Cohesin	10.422	-	EH38E1540131	chr11	58788368	58788654	dELS,CTCF-bound
3C560	Male	chr12	108563725	G	C	CTCF CTCF-Cohesin	10.3334	-	EH38E1642264	chr12	108563511	108563861	pELS,CTCF-bound
G01-GEA252HI	Male	chr12	58919607	A	G	E12 Erythroblast-like	10.3233	+	EH38E1617548	chr12	58919296	58919640	PLS,CTCF-bound
G01-GEA219HI	Male	chr7	45154790	G	A	CTCF CTCF-Cohesin	10.305	-	EH38E2553830	chr7	45154619	45154969	CTCF-only,CTCF-bound
G01-GEA185HI	Female	chr5	73792931	C	G	CTCF CTCF-Cohesin	10.3032	-	EH38E2382053	chr5	73792756	73793099	dELS,CTCF-bound
G01-GEA053HI	Female	chr8	10839809	G	A	CTCF CTCF-Cohesin	10.2969	+	EH38E2610368	chr8	10839745	10840095	PLS,CTCF-bound
G01-GEA032HI	Female	chr12	116559922	A	G	E4 Multi-tissue	10.2801	-	EH38E1647791	chr12	116559779	116560105	pELS,CTCF-bound
G01-GEA266HI	Male	chr9	97598874	A	C	CTCF CTCF-Cohesin	10.2325	-	EH38E2710933	chr9	97598734	97599041	dELS,CTCF-bound
G01-GEA191HI	Male	chr4	10165018	A	C	CTCF CTCF-Cohesin	10.2242	-	EH38E2280814	chr4	10164935	10165136	CTCF-only,CTCF-bound
3B331	Male	chr11	85664265	T	C	CTCF CTCF-Cohesin	10.1959	-	EH38E1558122	chr11	85664127	85664476	pELS,CTCF-bound
G01-GEA211HI	Male	chr1	247078977	C	A	CTCF CTCF-Cohesin	10.1795	-	EH38E1440238	chr1	247078681	247079031	PLS,CTCF-bound
3C572	Male	chr12	62260222	T	TG	CTCF CTCF-Cohesin	10.168	-	EH38E1618376	chr12	62260092	62260442	PLS,CTCF-bound
G01-GEA182HI	Male	chr2	42928743	A	ATATGGG	CTCF CTCF-Cohesin	10.1547	-	EH38E1992049	chr2	42928599	42928935	dELS,CTCF-bound
G01-GEA158HI	Male	chr6	39088514	G	T	CTCF CTCF-Cohesin	10.1365	-	EH38E2465375	chr6	39088328	39088641	dELS,CTCF-bound
G01-GEA337HI	Male	chr17	74368447	G	T	CTCF CTCF-Cohesin	10.1341	-	EH38E1884893	chr17	74368278	74368622	pELS,CTCF-bound
G01-GEA158HI	Male	chr1	25695261	G	A	CTCF CTCF-Cohesin	10.1326	+	EH38E1329774	chr1	25695055	25695404	dELS,CTCF-bound
G01-GEA001HI	Male	chr16	78099651	G	T	CTCF CTCF-Cohesin	10.1295	-	EH38E1829328	chr16	78099328	78099678	PLS,CTCF-bound
G01-GEA090HI	Male	chr3	188951072	T	G	E4 Multi-tissue	10.1069	-	EH38E2267864	chr3	188950823	188951173	dELS,CTCF-bound
G01-GEA143HI	Female	chr19	2337536	G	C	CTCF CTCF-Cohesin	10.1059	-	EH38E1932309	chr19	2337328	2337662	dELS,CTCF-bound
5L790	Male	chr17	76839838	GT	G	PC4 Polycomb / Bivalent stem cell Enh	10.1042	+	EH38E1887469	chr17	76839771	76840121	dELS,CTCF-bound
G01-GEA209HI	Male	chr15	66707564	GCTC	G	CTCF CTCF-Cohesin	10.0963	-	EH38E1771640	chr15	66707456	66707759	dELS,CTCF-bound
G01-GEA309HI	Male	chr6	24357912	G	T	CTCF CTCF-Cohesin	10.0726	+	EH38E2454459	chr6	24357838	24358188	PLS,CTCF-bound
G01-GEA032HI	Female	chr1	76868268	G	C	CTCF CTCF-Cohesin	10.0227	-	EH38E1360241	chr1	76868208	76868558	pELS,CTCF-bound
G01-GEA296HI	Male	chr6	45608054	G	A	E4 Multi-tissue	10.0094	-	EH38E2470230	chr6	45607835	45608185	dELS,CTCF-bound
G01-GEA043HI	Male	chr11	70568840	GC	G	CTCF CTCF-Cohesin	9.99494	+	EH38E1549705	chr11	70568589	70568935	dELS,CTCF-bound
3E465	Male	chr1	203674119	T	A	E5 B-cell-like	9.97463	-	EH38E1413833	chr1	203674063	203674413	dELS,CTCF-bound
3D629	Male	chr10	77943555	T	C	E4 Multi-tissue	9.96696	-	EH38E1481384	chr10	77943380	77943601	dELS
G01-GEA209HI	Male	chr17	36534971	TA	T	P Promoter	9.95061	-	EH38E1858928	chr17	36534778	36535128	PLS,CTCF-bound
3B331	Male	chr22	43007788	C	G	E12 Erythroblast-like	9.93823	-	EH38E2167745	chr22	43007637	43007981	dELS
G01-GEA009HI	Male	chr7	4682746	G	A	CTCF CTCF-Cohesin	9.89894	-	EH38E2531004	chr7	4682593	4682902	pELS,CTCF-bound
G01-GEA152HI	Male	chr14	93207078	C	G	CTCF CTCF-Cohesin	9.89735	-	EH38E1737614	chr14	93206944	93207294	PLS,CTCF-bound
G01-GEA176HI	Male	chr6	161234411	T	C	E4 Multi-tissue	9.86727	-	EH38E2521736	chr6	161234252	161234601	dELS
G01-GEA074HI	Male	chr12	18430623	G	C	CTCF CTCF-Cohesin	9.8497	+	EH38E1596470	chr12	18430505	18430750	CTCF-only,CTCF-bound
2F957	Male	chr6	157981728	G	C	CTCF CTCF-Cohesin	9.82019	-	EH38E2519416	chr6	157981475	157981820	pELS,CTCF-bound
4B848	Male	chr8	74984494	G	T	CTCF CTCF-Cohesin	9.814	+	EH38E2641067	chr8	74984368	74984716	PLS,CTCF-bound
3C145	Female	chr12	75820953	C	T	CTCF CTCF-Cohesin	9.80755	+	EH38E1625443	chr12	75820883	75821233	dELS,CTCF-bound
G01-GEA071HI	Female	chr16	85087043	G	A	CTCF CTCF-Cohesin	9.79264	+	EH38E1833862	chr16	85086700	85087050	dELS,CTCF-bound
2K890	Male	chr15	99704555	C	T	CTCF CTCF-Cohesin	9.77915	-	EH38E1792776	chr15	99704394	99704742	dELS,CTCF-bound
3E480	Male	chr6	76877133	C	T	CTCF CTCF-Cohesin	9.7568	-	EH38E2480409	chr6	76877030	76877268	dELS,CTCF-bound
G01-GEA251HI	Male	chr16	71289388	G	C	CTCF CTCF-Cohesin	9.75596	+	EH38E1825737	chr16	71289283	71289633	PLS,CTCF-bound
G01-GEA158HI	Male	chr12	113153450	TGGCGCTGAGTGGCTCAGGGACGGCTTCGGACC	T	CTCF CTCF-Cohesin	9.7554	-	EH38E1645581	chr12	113153270	113153598	dELS,CTCF-bound
G01-GEA252HI	Male	chr8	13566850	C	G	E4 Multi-tissue	9.73041	-	EH38E2612068	chr8	13566614	13566963	PLS,CTCF-bound
G01-GEA214HI	Male	chr1	153634479	G	C	P Promoter	9.71308	-	EH38E1385581	chr1	153634285	153634631	PLS,CTCF-bound
G01-GEA266HI	Male	chr8	28494237	C	G	CTCF CTCF-Cohesin	9.70097	-	EH38E2620441	chr8	28494015	28494365	PLS,CTCF-bound
G01-GEA302HI	Male	chr4	1763658	C	T	CTCF CTCF-Cohesin	9.697	-	EH38E2275055	chr4	1763463	1763798	dELS,CTCF-bound
4C200	Female	chr15	90185309	C	CG	CTCF CTCF-Cohesin	9.68426	+	EH38E1787278	chr15	90185102	90185447	pELS,CTCF-bound
G01-GEA147HI	Male	chr2	60550399	C	CCCCCCA	CTCF CTCF-Cohesin	9.67678	-	EH38E2001452	chr2	60550267	60550613	pELS,CTCF-bound
G01-GEA226HI	Female	chr16	83446966	A	G	CTCF CTCF-Cohesin	9.67551	-	EH38E1832604	chr16	83446819	83447107	CTCF-only,CTCF-bound
3B479	Male	chr7	76359448	C	T	CTCF CTCF-Cohesin	9.67331	-	EH38E2564792	chr7	76359217	76359566	pELS,CTCF-bound
5G257	Male	chr6	75749106	AGCGCGCCCTCCCTCCCGGAGC	A	CTCF CTCF-Cohesin	9.67282	+	EH38E2480144	chr6	75749011	75749360	PLS,CTCF-bound
G01-GEA114HI	Male	chr1	154937708	T	G	CTCF CTCF-Cohesin	9.66684	-	EH38E1386602	chr1	154937500	154937753	pELS,CTCF-bound
G01-GEA240HI	Female	chr20	44407570	C	T	E4 Multi-tissue	9.66674	-	EH38E2114739	chr20	44407434	44407782	pELS,CTCF-bound
G01-GEA204HI	Male	chr17	35448846	C	T	E4 Multi-tissue	9.64942	-	EH38E1858382	chr17	35448646	35448992	PLS,CTCF-bound
G01-GEA158HI	Male	chr17	34961196	A	G	CTCF CTCF-Cohesin	9.63631	+	EH38E1858072	chr17	34961109	34961310	PLS,CTCF-bound
3E465	Male	chr11	121671414	G	A	E12 Erythroblast-like	9.62953	-	EH38E1576770	chr11	121671252	121671601	dELS
G01-GEA296HI	Male	chr6	26189021	TGACGCTTGGCGCCACCCTTACCTA	T	CTCF CTCF-Cohesin	9.61795	-	EH38E2455837	chr6	26188943	26189293	PLS,CTCF-bound
G01-GEA180HI	Male	chr22	23787397	CGTGGCCTAGTGGGCGTGTCGGGT	C	P Promoter	9.60692	-	EH38E2152916	chr22	23787182	23787525	pELS,CTCF-bound
4B691	Female	chr1	24688725	C	G	CTCF CTCF-Cohesin	9.59202	-	EH38E1328874	chr1	24688605	24688887	dELS,CTCF-bound
G01-GEA307HI	Female	chr12	122437735	A	G	E4 Multi-tissue	9.5886	-	EH38E1651620	chr12	122437579	122437916	dELS
G01-GEA310HI	Male	chr2	223993817	G	A	CTCF CTCF-Cohesin	9.57526	-	EH38E2078730	chr2	223993677	223994009	dELS,CTCF-bound
G01-GEA059HI	Female	chr11	62959002	C	T	E4 Multi-tissue	9.54543	-	EH38E1543066	chr11	62958916	62959128	dELS
2F867	Male	chr1	53328151	C	G	CTCF CTCF-Cohesin	9.54457	+	EH38E1348141	chr1	53327938	53328288	PLS,CTCF-bound
G01-GEA305HI	Male	chr6	85642889	A	C	CTCF CTCF-Cohesin	9.53638	+	EH38E2483387	chr6	85642830	85643178	PLS,CTCF-bound
G01-GEA001HI	Male	chr3	8111251	GATTGGTAAA	G	E12 Erythroblast-like	9.52216	+	EH38E2176223	chr3	8111177	8111520	dELS,CTCF-bound
G01-GEA283HI	Male	chr2	168211341	CAT	C	E4 Multi-tissue	9.51418	-	EH38E2049137	chr2	168211169	168211510	dELS
3C545	Male	chr6	150395627	C	A	CTCF CTCF-Cohesin	9.50709	-	EH38E2514832	chr6	150395503	150395852	dELS,CTCF-bound
XA214	Female	chr1	6490653	G	A	CTCF CTCF-Cohesin	9.49666	+	EH38E1314514	chr1	6490451	6490787	PLS,CTCF-bound
G01-GEA288HI	Male	chr12	56118281	C	G	CTCF CTCF-Cohesin	9.49543	-	EH38E1615487	chr12	56118000	56118350	PLS,CTCF-bound
G01-GEA307HI	Female	chr2	190180301	G	C	CTCF CTCF-Cohesin	9.48631	-	EH38E2060530	chr2	190180173	190180522	PLS,CTCF-bound
2F730	Male	chr6	24666977	TGCTCTCGGAAAACTGGTGCAGCTGCGCCGCAAGGGAGCCGCCGGGGCGGTGGGTGCGAAGCGCGCATGCGCGCTTCGTCACAAGGGTG	T	E5 B-cell-like	9.46721	-	EH38E2454637	chr6	24666835	24667185	PLS,CTCF-bound
3D317	Female	chr9	33161759	G	C	TF3 FOXA1 / AR / ESR1	9.46644	-	EH38E2690311	chr9	33161627	33161887	dELS,CTCF-bound
XH678	Male	chr17	2848972	C	T	CTCF CTCF-Cohesin	9.42971	-	EH38E1841283	chr17	2848704	2849048	dELS,CTCF-bound
G01-GEA129HI	Male	chr12	6766937	G	T	CTCF CTCF-Cohesin	9.4282	-	EH38E1590238	chr12	6766884	6767184	pELS,CTCF-bound
G01-GEA149HI	Male	chr17	4704003	G	C	CTCF CTCF-Cohesin	9.4226	+	EH38E1842566	chr17	4703753	4704007	pELS,CTCF-bound
G01-GEA176HI	Male	chr9	94603453	C	T	CTCF CTCF-Cohesin	9.40904	-	EH38E2708938	chr9	94603402	94603751	dELS,CTCF-bound
G01-GEA302HI	Male	chr3	9947294	C	A	CTCF CTCF-Cohesin	9.39816	-	EH38E2177481	chr3	9947160	9947505	PLS,CTCF-bound
G01-GEA192HI	Male	chr1	1292035	C	A	CTCF CTCF-Cohesin	9.38448	-	EH38E1310726	chr1	1291826	1292171	dELS,CTCF-bound
G01-GEA305HI	Male	chr11	130146463	A	T	CTCF CTCF-Cohesin	9.36621	-	EH38E1582284	chr11	130146362	130146695	dELS,CTCF-bound
G01-GEA334HI	Male	chr2	169131990	C	T	CTCF CTCF-Cohesin	9.35483	-	EH38E2049820	chr2	169131962	169132205	CTCF-only,CTCF-bound
3C559	Male	chr2	55168752	C	T	CTCF CTCF-Cohesin	9.34589	+	EH38E1999331	chr2	55168594	55168834	dELS,CTCF-bound
G01-GEA041HI	Female	chr11	47269578	ACTCCATCTCCCAGCGGGCGCCGCGG	A	E5 B-cell-like	9.33107	-	EH38E1538071	chr11	47269477	47269827	PLS,CTCF-bound
G01-GEA248HI	Male	chr11	63767592	G	A	E4 Multi-tissue	9.31179	-	EH38E1543415	chr11	63767434	63767774	pELS,CTCF-bound
G01-GEA211HI	Male	chr8	10850608	A	G	CTCF CTCF-Cohesin	9.29951	-	EH38E2610370	chr8	10850478	10850781	dELS,CTCF-bound
G01-GEA313HI	Male	chr9	107067983	CTG	C	TF3 FOXA1 / AR / ESR1	9.27955	-	EH38E2715204	chr9	107067776	107068097	dELS
G01-GEA207HI	Male	chr8	78805102	A	C	CTCF CTCF-Cohesin	9.27071	+	EH38E2642249	chr8	78805014	78805247	pELS,CTCF-bound
G01-GEA226HI	Female	chr3	180037216	C	G	CTCF CTCF-Cohesin	9.26654	+	EH38E2262138	chr3	180036912	180037261	PLS,CTCF-bound
4B848	Male	chr16	75110806	G	A	CTCF CTCF-Cohesin	9.2568	-	EH38E1827937	chr16	75110725	75110991	PLS,CTCF-bound
G01-GEA248HI	Male	chr11	63767587	AGG	A	CTCF CTCF-Cohesin	9.25337	-	EH38E1543415	chr11	63767434	63767774	pELS,CTCF-bound
G01-GEA070HI	Male	chr1	44005839	C	G	CTCF CTCF-Cohesin	9.22945	-	EH38E1343007	chr1	44005671	44006021	dELS,CTCF-bound
G01-GEA041HI	Female	chr1	39133255	C	T	CTCF CTCF-Cohesin	9.19948	-	EH38E1339144	chr1	39132996	39133345	dELS,CTCF-bound
G01-GEA074HI	Male	chr16	85196600	G	A	TF3 FOXA1 / AR / ESR1	9.17737	+	EH38E1833989	chr16	85196542	85196802	dELS
G01-GEA140HI	Male	chr8	11854162	A	G	E12 Erythroblast-like	9.15275	-	EH38E2611215	chr8	11853966	11854271	dELS,CTCF-bound
G01-GEA241HI	Male	chr6	75747563	G	GT	TF3 FOXA1 / AR / ESR1	9.12893	-	EH38E2480139	chr6	75747343	75747679	pELS,CTCF-bound
G01-GEA040HI	Male	chr1	31182653	G	C	CTCF CTCF-Cohesin	9.12533	-	EH38E1333941	chr1	31182329	31182673	dELS,CTCF-bound
G01-GEA071HI	Female	chr11	108121537	T	A	CTCF CTCF-Cohesin	9.11445	-	EH38E1567564	chr11	108121315	108121665	PLS,CTCF-bound
G01-GEA313HI	Male	chr17	45197968	C	T	CTCF CTCF-Cohesin	9.08118	-	EH38E1865843	chr17	45197813	45198159	dELS,CTCF-bound
5L790	Male	chr1	223731633	G	C	E4 Multi-tissue	9.06907	-	EH38E1426060	chr1	223731505	223731726	dELS,CTCF-bound
3A671	Female	chr1	68051682	G	A	CTCF CTCF-Cohesin	9.05677	-	EH38E1357465	chr1	68051561	68051910	PLS,CTCF-bound
G01-GEA182HI	Male	chr2	42928749	A	ATAT	CTCF CTCF-Cohesin	9.04419	-	EH38E1992049	chr2	42928599	42928935	dELS,CTCF-bound
G01-GEA206HI	Male	chr16	84145051	G	C	CTCF CTCF-Cohesin	9.01115	-	EH38E1832994	chr16	84145035	84145384	PLS,CTCF-bound
G01-GEA192HI	Male	chr1	224204971	G	A	E12 Erythroblast-like	9.00875	-	EH38E1426340	chr1	224204813	224205163	dELS
G01-GEA327HI	Male	chr22	41285540	T	C	E4 Multi-tissue	8.98242	-	EH38E2166184	chr22	41285401	41285750	pELS,CTCF-bound
G01-GEA015HI	Male	chr4	3387990	TGCTGGCTCTGTGTGTCCCTCTGAGGAAGTGTGTCCTGGCTCCTCGCCAC	T	E4 Multi-tissue	8.96759	-	EH38E2276420	chr4	3387954	3388290	dELS
G01-GEA147HI	Male	chr22	39994826	G	A	CTCF CTCF-Cohesin	8.94887	+	EH38E2165158	chr22	39994591	39994926	PLS,CTCF-bound
G01-GEA209HI	Male	chr19	13764190	A	G	CTCF CTCF-Cohesin	8.93198	+	EH38E1940684	chr19	13764170	13764336	pELS,CTCF-bound
G01-GEA041HI	Female	chr17	7614406	G	A	CTCF CTCF-Cohesin	8.89787	+	EH38E1844551	chr17	7614261	7614483	pELS,CTCF-bound
3E475	Male	chr1	46302146	G	C	CTCF CTCF-Cohesin	8.83528	+	EH38E1344600	chr1	46301983	46302282	pELS,CTCF-bound
G01-GEA241HI	Male	chr14	73490979	C	CCGG	CTCF CTCF-Cohesin	8.80332	-	EH38E1727179	chr14	73490753	73491103	PLS,CTCF-bound
XH678	Male	chr12	96399387	G	C	CTCF CTCF-Cohesin	8.80186	-	EH38E1635718	chr12	96399224	96399454	pELS,CTCF-bound
G01-GEA249HI	Male	chr19	6738632	A	G	CTCF CTCF-Cohesin	8.77738	-	EH38E1936052	chr19	6738465	6738814	pELS,CTCF-bound
G01-GEA167HI	Male	chr12	85425096	C	T	CTCF CTCF-Cohesin	8.76307	-	EH38E1629417	chr12	85424970	85425211	dELS,CTCF-bound
G01-GEA074HI	Male	chr1	83861039	G	A	P Promoter	8.75966	-	EH38E1362865	chr1	83860857	83861163	PLS,CTCF-bound
G01-GEA337HI	Male	chr3	118885074	CAGTA	C	CTCF CTCF-Cohesin	8.73134	-	EH38E2230351	chr3	118884742	118885091	DNase-H3K4me3,CTCF-bound
3D632	Male	chr11	397390	G	T	CTCF CTCF-Cohesin	8.73134	-	EH38E1513481	chr11	397257	397458	dELS,CTCF-bound
G01-GEA043HI	Male	chr17	64074903	T	C	E4 Multi-tissue	8.73009	-	EH38E1877953	chr17	64074773	64075123	dELS,CTCF-bound
G01-GEA266HI	Male	chr2	221716618	A	T	E4 Multi-tissue	8.71621	-	EH38E2077362	chr2	221716523	221716751	dELS
G01-GEA309HI	Male	chr1	168082439	TGTC	T	CTCF CTCF-Cohesin	8.71492	-	EH38E1395197	chr1	168082235	168082585	dELS,CTCF-bound
3C565	Male	chr2	231190664	G	C	CTCF CTCF-Cohesin	8.64058	-	EH38E2082576	chr2	231190608	231190792	dELS,CTCF-bound
4B691	Female	chr18	3247812	G	A	E4 Multi-tissue	8.6399	-	EH38E1895771	chr18	3247628	3247928	PLS,CTCF-bound
3C560	Male	chr3	125595647	T	C	CTCF CTCF-Cohesin	8.60773	+	EH38E2234527	chr3	125595384	125595733	pELS,CTCF-bound
3A671	Female	chr18	23192474	C	T	E4 Multi-tissue	8.60734	-	EH38E1903840	chr18	23192384	23192727	dELS,CTCF-bound
G01-GEA281HI	Male	chr9	14400823	G	C	CTCF CTCF-Cohesin	8.58585	+	EH38E2683222	chr9	14400660	14401009	pELS,CTCF-bound
3D612	Male	chr16	4476422	C	A	CTCF CTCF-Cohesin	8.58418	-	EH38E1798430	chr16	4476223	4476570	PLS,CTCF-bound
G01-GEA152HI	Male	chr1	42967299	G	A	E12 Erythroblast-like	8.58377	-	EH38E1342129	chr1	42967134	42967482	dELS,CTCF-bound
G01-GEA032HI	Female	chr9	133726517	CT	C	CTCF CTCF-Cohesin	8.54932	-	EH38E2734280	chr9	133726361	133726635	DNase-H3K4me3,CTCF-bound
3D616	Female	chr5	132422820	C	T	E12 Erythroblast-like	8.5364	-	EH38E2408500	chr5	132422670	132423019	dELS,CTCF-bound
3D632	Male	chr4	70705640	C	A	CTCF CTCF-Cohesin	8.52723	+	EH38E2302091	chr4	70705457	70705797	pELS,CTCF-bound
G01-GEA015HI	Male	chr11	114440081	C	T	E4 Multi-tissue	8.51141	-	EH38E1571464	chr11	114439854	114440203	PLS,CTCF-bound
G01-GEA279HI	Female	chr15	40874326	C	A	P Promoter	8.49711	-	EH38E1756255	chr15	40874127	40874474	PLS,CTCF-bound
3D632	Male	chr3	127791382	T	C	E4 Multi-tissue	8.48795	-	EH38E2235932	chr3	127791330	127791525	dELS,CTCF-bound
G01-GEA149HI	Male	chr3	46663279	G	C	E4 Multi-tissue	8.48779	-	EH38E2198357	chr3	46663077	46663427	dELS
G01-GEA271HI	Male	chr9	36136367	C	G	CTCF CTCF-Cohesin	8.44007	-	EH38E2692308	chr9	36136287	36136458	PLS,CTCF-bound
G01-GEA180HI	Male	chr5	172770728	C	G	CTCF CTCF-Cohesin	8.4134	-	EH38E2432315	chr5	172770578	172770925	pELS,CTCF-bound
G01-GEA104HI	Male	chr2	64653720	G	A	CTCF CTCF-Cohesin	8.40556	+	EH38E2003998	chr2	64653693	64654041	PLS,CTCF-bound
G01-GEA158HI	Male	chr1	163069348	C	A	CTCF CTCF-Cohesin	8.38893	-	EH38E1392515	chr1	163069183	163069532	PLS,CTCF-bound
5L790	Male	chr1	212791638	C	G	CTCF CTCF-Cohesin	8.38683	+	EH38E1420522	chr1	212791362	212791685	PLS,CTCF-bound
G01-GEA147HI	Male	chr6	170153244	C	T	E4 Multi-tissue	8.35368	-	EH38E2526806	chr6	170152985	170153321	dELS,CTCF-bound
3D616	Female	chr1	228082532	T	G	CTCF CTCF-Cohesin	8.34574	-	EH38E1428771	chr1	228082447	228082797	PLS,CTCF-bound
G01-GEA150HI	Male	chr9	97501212	CAG	C	CTCF CTCF-Cohesin	8.34353	+	EH38E2710838	chr9	97501188	97501370	PLS,CTCF-bound
G01-GEA218HI	Male	chr11	65540472	G	T	CTCF CTCF-Cohesin	8.33165	-	EH38E1545284	chr11	65540170	65540518	dELS,CTCF-bound
5L790	Male	chr22	40183456	G	A	CTCF CTCF-Cohesin	8.32568	+	EH38E2165293	chr22	40183270	40183609	dELS
G01-GEA208HI	Male	chr2	95207155	T	C	CTCF CTCF-Cohesin	8.3236	+	EH38E2016083	chr2	95206942	95207158	pELS,CTCF-bound
G01-GEA310HI	Male	chr13	72566092	A	C	CTCF CTCF-Cohesin	8.32256	-	EH38E1682315	chr13	72565970	72566172	DNase-H3K4me3,CTCF-bound
3E473	Male	chr8	119767915	G	A	CTCF CTCF-Cohesin	8.29411	-	EH38E2660641	chr8	119767699	119768049	dELS,CTCF-bound
3C560	Male	chr5	142713283	G	A	CTCF CTCF-Cohesin	8.25853	-	EH38E2415895	chr5	142713225	142713418	dELS,CTCF-bound
G01-GEA267HI	Male	chr8	105319659	C	G	CTCF CTCF-Cohesin	8.24416	+	EH38E2655065	chr8	105319332	105319675	PLS,CTCF-bound
3D612	Male	chr20	34872832	C	T	CTCF CTCF-Cohesin	8.23462	+	EH38E2108714	chr20	34872762	34873090	PLS,CTCF-bound
G01-GEA167HI	Male	chr6	155224206	T	G	E4 Multi-tissue	8.23135	-	EH38E2517547	chr6	155224048	155224398	dELS,CTCF-bound
3C139	Male	chr16	85753263	G	C	CTCF CTCF-Cohesin	8.22385	-	EH38E1834757	chr16	85753068	85753418	dELS,CTCF-bound
G01-GEA217HI	Male	chr9	132878319	C	T	P Promoter	8.21047	-	EH38E2733521	chr9	132878177	132878527	pELS,CTCF-bound
3E473	Male	chr1	109792313	T	G	CTCF CTCF-Cohesin	8.20753	-	EH38E1375118	chr1	109792139	109792457	dELS,CTCF-bound
G01-GEA015HI	Male	chr13	27403483	C	T	E6 Weak epithelial	8.19904	-	EH38E1662529	chr13	27403332	27403665	pELS,CTCF-bound
G01-GEA152HI	Male	chr13	44332076	T	G	E4 Multi-tissue	8.19615	-	EH38E1672670	chr13	44331980	44332326	dELS,CTCF-bound
2K890	Male	chr12	14554343	C	G	CTCF CTCF-Cohesin	8.18698	-	EH38E1594927	chr12	14554328	14554651	pELS,CTCF-bound
G01-GEA217HI	Male	chr16	11297645	A	G	E12 Erythroblast-like	8.18663	-	EH38E1801738	chr16	11297575	11297925	dELS,CTCF-bound
3C565	Male	chr12	45216462	G	C	CTCF CTCF-Cohesin	8.15328	-	EH38E1607183	chr12	45216450	45216655	pELS,CTCF-bound
G01-GEA103HI	Male	chr7	24757805	C	G	CTCF CTCF-Cohesin	8.12406	-	EH38E2540832	chr7	24757793	24758114	PLS,CTCF-bound
3D630	Male	chr17	15490848	C	T	E12 Erythroblast-like	8.11637	-	EH38E1848892	chr17	15490728	15491078	dELS
3C147	Male	chr16	87464859	T	C	E4 Multi-tissue	8.10863	-	EH38E1836169	chr16	87464643	87464985	dELS
G01-GEA148HI	Female	chr11	118690250	C	CT	CTCF CTCF-Cohesin	8.09726	-	EH38E1574379	chr11	118690077	118690382	pELS,CTCF-bound
G01-GEA264HI	Male	chr16	86517874	G	A	CTCF CTCF-Cohesin	8.09563	-	EH38E1835434	chr16	86517694	86518031	dELS,CTCF-bound
G01-GEA173HI	Male	chr17	29617224	C	G	CTCF CTCF-Cohesin	8.09324	-	EH38E1854981	chr17	29617103	29617452	dELS,CTCF-bound
G01-GEA309HI	Male	chr12	111597620	C	G	CTCF CTCF-Cohesin	8.0637	+	EH38E1644638	chr12	111597359	111597695	pELS,CTCF-bound
G01-GEA204HI	Male	chr22	17158717	TG	T	CTCF CTCF-Cohesin	8.05773	-	EH38E2148470	chr22	17158676	17158991	pELS,CTCF-bound
3B479	Male	chr14	102510068	G	A	CTCF CTCF-Cohesin	8.05363	-	EH38E1744051	chr14	102509748	102510095	PLS,CTCF-bound
G01-GEA012HI	Female	chr4	168831971	C	T	P Promoter	8.04163	-	EH38E2342798	chr4	168831926	168832194	PLS,CTCF-bound
G01-GEA327HI	Male	chr5	177087129	G	A	CTCF CTCF-Cohesin	8.02467	-	EH38E2435322	chr5	177087075	177087425	pELS,CTCF-bound
G01-GEA167HI	Male	chr2	212940966	C	A	E4 Multi-tissue	8.00661	-	EH38E2071957	chr2	212940857	212941193	dELS,CTCF-bound
3B331	Male	chr15	57581000	C	T	CTCF CTCF-Cohesin	8.00209	+	EH38E1764956	chr15	57580977	57581153	dELS,CTCF-bound
1D466	Female	chr14	77181665	G	A	CTCF CTCF-Cohesin	7.98331	-	EH38E1729991	chr14	77181513	77181863	PLS,CTCF-bound
1D466	Female	chr2	32356961	ACGCGCGAGCCCTCCCGCGCATGCTCCACC	A	E5 B-cell-like	7.97993	-	EH38E1985937	chr2	32356867	32357217	PLS,CTCF-bound
G01-GEA235HI	Male	chr21	31580953	T	A	CTCF CTCF-Cohesin	7.96522	-	EH38E2136845	chr21	31580800	31581136	CTCF-only,CTCF-bound
4B702	Male	chr11	66045311	G	A	CTCF CTCF-Cohesin	7.96364	-	EH38E1545821	chr11	66045133	66045482	pELS,CTCF-bound
G01-GEA045HI	Male	chr11	64878608	G	A	CTCF CTCF-Cohesin	7.95039	-	EH38E1544548	chr11	64878607	64878957	PLS,CTCF-bound
G01-GEA159HI	Female	chr7	4792257	G	A	CTCF CTCF-Cohesin	7.95022	-	EH38E2531120	chr7	4792130	4792477	dELS,CTCF-bound
G01-GEA009HI	Male	chr1	156213286	G	A	P Promoter	7.93094	-	EH38E1387777	chr1	156213053	156213346	PLS,CTCF-bound
G01-GEA096HI	Male	chr8	23304112	C	T	E4 Multi-tissue	7.91701	-	EH38E2617130	chr8	23304025	23304375	dELS
3C565	Male	chr1	224183178	G	A	E5 B-cell-like	7.91298	-	EH38E1426316	chr1	224182969	224183317	PLS,CTCF-bound
3E467	Female	chr3	42654462	GCCCCGCGCCCCCCGCC	G	CTCF CTCF-Cohesin	7.88768	+	EH38E2195523	chr3	42654367	42654608	PLS,CTCF-bound
3C560	Male	chr20	34705533	T	C	CTCF CTCF-Cohesin	7.87308	+	EH38E2108618	chr20	34705314	34705659	pELS,CTCF-bound
G01-GEA154HI	Male	chr3	136819074	C	CGCAGGT	CTCF CTCF-Cohesin	7.83015	-	EH38E2241236	chr3	136818875	136819224	PLS,CTCF-bound
3E480	Male	chr8	8346293	T	C	E12 Erythroblast-like	7.83012	-	EH38E2608547	chr8	8346243	8346458	dELS
G01-GEA264HI	Male	chr9	113587901	C	T	CTCF CTCF-Cohesin	7.82821	+	EH38E2719575	chr9	113587780	113587971	dELS,CTCF-bound
G01-GEA195HI	Male	chr9	136944303	ATCCCCCGGCC	A	CTCF CTCF-Cohesin	7.82388	+	EH38E2737348	chr9	136944265	136944486	pELS,CTCF-bound
G01-GEA009HI	Male	chr21	41420445	GTAACAC	G	CTCF CTCF-Cohesin	7.82191	-	EH38E2143640	chr21	41420382	41420701	PLS,CTCF-bound
G01-GEA071HI	Female	chr1	228165749	A	G	CTCF CTCF-Cohesin	7.82156	-	EH38E1428902	chr1	228165475	228165822	PLS,CTCF-bound
G01-GEA310HI	Male	chr17	78314378	G	A	CTCF CTCF-Cohesin	7.8073	-	EH38E1888979	chr17	78314232	78314580	pELS,CTCF-bound
G01-GEA336HI	Male	chr1	6601191	G	A	E12 Erythroblast-like	7.79909	-	EH38E1314629	chr1	6601038	6601385	pELS,CTCF-bound
G01-GEA209HI	Male	chr14	54440934	G	C	CTCF CTCF-Cohesin	7.79707	+	EH38E1715322	chr14	54440928	54441190	pELS,CTCF-bound
G01-GEA309HI	Male	chr3	120094016	G	A	CTCF CTCF-Cohesin	7.79196	+	EH38E2231084	chr3	120093840	120094188	pELS,CTCF-bound
3C563	Male	chr2	202039113	C	T	E4 Multi-tissue	7.786	-	EH38E2066531	chr2	202038989	202039172	dELS,CTCF-bound
G01-GEA101HI	Male	chr1	202184866	G	A	CTCF CTCF-Cohesin	7.77652	-	EH38E1412468	chr1	202184716	202185062	DNase-H3K4me3,CTCF-bound
G01-GEA289HI	Female	chr15	74642542	G	A	TF3 FOXA1 / AR / ESR1	7.77336	-	EH38E1777868	chr15	74642449	74642772	dELS
3C565	Male	chr20	3807749	AATGCCCAGGCTTTGTGCCAGGTGCTG	A	E4 Multi-tissue	7.75335	-	EH38E2093761	chr20	3807415	3807764	pELS,CTCF-bound
G01-GEA180HI	Male	chr5	76715842	AGT	A	E4 Multi-tissue	7.75301	-	EH38E2383954	chr5	76715783	76716094	PLS,CTCF-bound
3G089	Male	chr5	42950829	ACT	A	E12 Erythroblast-like	7.74966	-	EH38E2369288	chr5	42950590	42950940	dELS,CTCF-bound
G01-GEA176HI	Male	chr11	12248657	ACT	A	TF3 FOXA1 / AR / ESR1	7.74527	-	EH38E1521502	chr11	12248448	12248797	dELS
G01-GEA176HI	Male	chr7	17706947	G	A	CTCF CTCF-Cohesin	7.72917	-	EH38E2537137	chr7	17706822	17707023	dELS,CTCF-bound
2F730	Male	chr9	72396729	A	G	E4 Multi-tissue	7.72325	-	EH38E2696767	chr9	72396649	72396988	dELS,CTCF-bound
3B336	Male	chr4	159229303	CAAG	C	E4 Multi-tissue	7.72049	-	EH38E2339997	chr4	159229216	159229562	dELS
G01-GEA160HI	Male	chr16	74623440	T	C	CTCF CTCF-Cohesin	7.70451	-	EH38E1827563	chr16	74623304	74623522	dELS,CTCF-bound
G01-GEA182HI	Male	chr14	39015568	C	T	CTCF CTCF-Cohesin	7.69502	+	EH38E1710104	chr14	39015442	39015676	dELS,CTCF-bound
3A551	Female	chr1	96721641	G	GCGGCGCCCACTCCCCCTAGTCC	CTCF CTCF-Cohesin	7.67866	-	EH38E1370199	chr1	96721542	96721891	PLS,CTCF-bound
G01-GEA288HI	Male	chr10	102399457	C	T	CTCF CTCF-Cohesin	7.67834	+	EH38E1494969	chr10	102399294	102399464	dELS,CTCF-bound
3E465	Male	chr6	6700069	T	G	CTCF CTCF-Cohesin	7.65591	+	EH38E2443034	chr6	6700026	6700375	dELS,CTCF-bound
G01-GEA105HI	Male	chr1	204493999	TTAAA	T	TF3 FOXA1 / AR / ESR1	7.65552	-	EH38E1414559	chr1	204493907	204494254	dELS,CTCF-bound
4B699	Male	chr5	148147640	A	T	TF3 FOXA1 / AR / ESR1	7.65214	-	EH38E2418968	chr5	148147456	148147800	dELS
G01-GEA120HI	Male	chr15	68560039	A	G	CTCF CTCF-Cohesin	7.65108	+	EH38E1773257	chr15	68559949	68560167	dELS,CTCF-bound
G01-GEA015HI	Male	chr17	82267645	G	A	E4 Multi-tissue	7.63227	-	EH38E1893224	chr17	82267567	82267914	dELS,CTCF-bound
3D612	Male	chr20	63521077	GGCCCCGCGCACAAAGCGCCTTTGTTCCACCCGCTCGGCCGGTTTGGGCTGGTTGGAGCCGCCCGC	G	CTCF CTCF-Cohesin	7.61606	-	EH38E2129350	chr20	63520983	63521309	pELS,CTCF-bound
G01-GEA313HI	Male	chr18	79379155	T	C	CTCF CTCF-Cohesin	7.61381	-	EH38E1929115	chr18	79379011	79379359	dELS,CTCF-bound
G01-GEA110HI	Female	chr19	58475950	A	ACG	CTCF CTCF-Cohesin	7.61315	+	EH38E1966374	chr19	58475949	58476299	PLS,CTCF-bound
3C567	Male	chr1	169109896	T	C	E4 Multi-tissue	7.61185	-	EH38E1395875	chr1	169109769	169110115	dELS,CTCF-bound
G01-GEA090HI	Male	chr16	67393471	C	G	CTCF CTCF-Cohesin	7.61163	-	EH38E1822874	chr16	67393391	67393741	PLS,CTCF-bound
G01-GEA158HI	Male	chr1	921208	C	T	CTCF CTCF-Cohesin	7.60294	-	EH38E1310236	chr1	921066	921390	pELS,CTCF-bound
G01-GEA158HI	Male	chr17	63425580	C	T	CTCF CTCF-Cohesin	7.59733	-	EH38E1877369	chr17	63425501	63425767	CTCF-only,CTCF-bound
G01-GEA071HI	Female	chr2	64645249	G	C	CTCF CTCF-Cohesin	7.59654	+	EH38E2003983	chr2	64645146	64645397	pELS,CTCF-bound
XH678	Male	chr12	132506935	C	T	E5 B-cell-like	7.58875	-	EH38E1657627	chr12	132506782	132507131	dELS,CTCF-bound
3E467	Female	chr14	64972468	C	G	CTCF CTCF-Cohesin	7.5854	+	EH38E1721575	chr14	64972165	64972471	PLS,CTCF-bound
G01-GEA143HI	Female	chr22	45263943	G	A	CTCF CTCF-Cohesin	7.5757	-	EH38E2169379	chr22	45263778	45264120	pELS,CTCF-bound
G01-GEA241HI	Male	chr5	168656720	G	T	TF3 FOXA1 / AR / ESR1	7.56559	+	EH38E2429436	chr5	168656691	168657040	dELS
2F957	Male	chr6	108589616	CA	C	E12 Erythroblast-like	7.56119	-	EH38E2492197	chr6	108589429	108589777	dELS,CTCF-bound
5B577	Male	chr12	50057269	A	G	CTCF CTCF-Cohesin	7.55278	+	EH38E1610668	chr12	50057191	50057439	pELS,CTCF-bound
3D630	Male	chr9	104928373	TGGGTG	T	CTCF CTCF-Cohesin	7.54738	+	EH38E2714049	chr9	104928031	104928380	PLS,CTCF-bound
3C544	Female	chr16	15551144	T	G	E4 Multi-tissue	7.53936	-	EH38E1804259	chr16	15550933	15551280	dELS,CTCF-bound
4B858	Male	chr1	23421988	G	A	TF3 FOXA1 / AR / ESR1	7.53795	+	EH38E1327776	chr1	23421769	23422113	dELS,CTCF-bound
G01-GEA003HI	Male	chr12	124914914	GT	G	CTCF CTCF-Cohesin	7.53465	-	EH38E1653874	chr12	124914803	124915047	pELS,CTCF-bound
G01-GEA104HI	Male	chr13	48233553	C	T	CTCF CTCF-Cohesin	7.53152	-	EH38E1674998	chr13	48233372	48233694	pELS,CTCF-bound
G01-GEA306HI	Male	chr14	76811160	G	A	CTCF CTCF-Cohesin	7.50977	+	EH38E1729580	chr14	76811054	76811382	pELS,CTCF-bound
G01-GEA307HI	Female	chr15	31264121	C	T	E4 Multi-tissue	7.50337	-	EH38E1750790	chr15	31263949	31264292	dELS,CTCF-bound
G01-GEA105HI	Male	chr22	38218776	C	G	E5 B-cell-like	7.48439	-	EH38E2163609	chr22	38218574	38218923	dELS,CTCF-bound
3C565	Male	chr11	48019472	C	G	E4 Multi-tissue	7.48204	+	EH38E1538692	chr11	48019243	48019593	dELS
G01-GEA305HI	Male	chr5	43020602	G	T	CTCF CTCF-Cohesin	7.47832	+	EH38E2369363	chr5	43020424	43020617	pELS,CTCF-bound
G01-GEA182HI	Male	chr4	663644	C	T	P Promoter	7.47726	-	EH38E2274047	chr4	663515	663865	pELS,CTCF-bound
G01-GEA241HI	Male	chr15	100849670	C	G	CTCF CTCF-Cohesin	7.46393	+	EH38E1793434	chr15	100849540	100849884	PLS,CTCF-bound
3D629	Male	chr4	25377246	C	CGGCGGGGCGG	CTCF CTCF-Cohesin	7.45656	-	EH38E2287160	chr4	25376988	25377337	PLS,CTCF-bound
G01-GEA152HI	Male	chr6	150395627	C	T	CTCF CTCF-Cohesin	7.45581	-	EH38E2514832	chr6	150395503	150395852	dELS,CTCF-bound
G01-GEA176HI	Male	chr4	52250255	GTAAAATTTGGCTCTCAAGCCAGAGATGAAGTCATGCTACTGGCTTTATAAGCTATTGCAGCTGCACAATGTCCCTAGAGACCCTCGTTCCCT	G	E4 Multi-tissue	7.45153	-	EH38E2296321	chr4	52250149	52250499	dELS
G01-GEA252HI	Male	chr2	70554293	G	T	CTCF CTCF-Cohesin	7.44832	-	EH38E2008111	chr2	70554030	70554351	PLS,CTCF-bound
G01-GEA302HI	Male	chr11	77141333	C	T	E4 Multi-tissue	7.42185	+	EH38E1554546	chr11	77141130	77141475	dELS,CTCF-bound
G01-GEA204HI	Male	chr11	796327	ACTTTCT	A	P Promoter	7.41019	-	EH38E1513960	chr11	796192	796541	PLS,CTCF-bound
G01-GEA224HI	Female	chr7	1466924	G	A	CTCF CTCF-Cohesin	7.38701	-	EH38E2528576	chr7	1466741	1467081	pELS,CTCF-bound
4B858	Male	chr9	113150867	G	C	CTCF CTCF-Cohesin	7.37694	+	EH38E2719176	chr9	113150771	113151121	PLS,CTCF-bound
G01-GEA041HI	Female	chr19	49339589	G	C	E4 Multi-tissue	7.36448	-	EH38E1960750	chr19	49339338	49339688	pELS,CTCF-bound
G01-GEA258HI	Female	chr3	183490884	C	T	E4 Multi-tissue	7.35271	-	EH38E2263743	chr3	183490794	183491139	dELS
3C554	Male	chr8	90646381	AGGCGCGCGCATGCCTGCGTGTCAG	A	CTCF CTCF-Cohesin	7.32612	-	EH38E2646552	chr8	90646295	90646614	PLS,CTCF-bound
5G257	Male	chr14	21511379	G	A	E5 B-cell-like	7.31411	-	EH38E1701695	chr14	21511289	21511639	PLS,CTCF-bound
G01-GEA120HI	Male	chr1	226738672	G	A	CTCF CTCF-Cohesin	7.31247	-	EH38E1428043	chr1	226738496	226738836	pELS,CTCF-bound
3C545	Male	chr18	8480682	C	T	CTCF CTCF-Cohesin	7.30819	+	EH38E1898420	chr18	8480504	8480801	dELS,CTCF-bound
3E480	Male	chr11	59198255	C	T	E4 Multi-tissue	7.30601	-	EH38E1540326	chr11	59198035	59198385	dELS
G01-GEA159HI	Female	chr1	150272696	GGGA	G	CTCF CTCF-Cohesin	7.30284	-	EH38E1383481	chr1	150272587	150272763	PLS,CTCF-bound
G01-GEA032HI	Female	chr10	19638799	T	C	TF3 FOXA1 / AR / ESR1	7.2915	-	EH38E1452878	chr10	19638553	19638902	dELS,CTCF-bound
G01-GEA028HI	Male	chr6	2988496	G	A	E4 Multi-tissue	7.28442	-	EH38E2440284	chr6	2988462	2988811	PLS,CTCF-bound
G01-GEA124HI	Male	chr19	1101967	G	A	CTCF CTCF-Cohesin	7.2723	-	EH38E1930835	chr19	1101747	1102092	dELS,CTCF-bound
3C565	Male	chr1	204349012	C	G	E4 Multi-tissue	7.2596	-	EH38E1414381	chr1	204348827	204349167	pELS,CTCF-bound
3A550	Male	chr21	41958268	C	A	CTCF CTCF-Cohesin	7.21724	-	EH38E2144178	chr21	41958084	41958433	dELS,CTCF-bound
G01-GEA193HI	Male	chr4	54091912	C	A	P Promoter	7.19981	-	EH38E2297429	chr4	54091778	54092117	dELS,CTCF-bound
3C563	Male	chr10	102399458	C	T	CTCF CTCF-Cohesin	7.19168	+	EH38E1494969	chr10	102399294	102399464	dELS,CTCF-bound
3E480	Male	chr5	168295674	T	G	CTCF CTCF-Cohesin	7.18021	-	EH38E2429172	chr5	168295615	168295965	dELS,CTCF-bound
G01-GEA136HI	Male	chr12	120226063	C	CG	E5 B-cell-like	7.16669	-	EH38E1649731	chr12	120225979	120226318	pELS,CTCF-bound
G01-GEA283HI	Male	chr6	142845958	G	A	CTCF CTCF-Cohesin	7.15536	-	EH38E2510445	chr6	142845957	142846307	dELS,CTCF-bound
G01-GEA173HI	Male	chr22	40683167	G	A	CTCF CTCF-Cohesin	7.15028	-	EH38E2165778	chr22	40683065	40683415	dELS,CTCF-bound
3A550	Male	chr11	129854022	C	T	E4 Multi-tissue	7.14996	-	EH38E1582038	chr11	129853862	129854211	dELS
G01-GEA337HI	Male	chr12	132904903	G	C	CTCF CTCF-Cohesin	7.13982	-	EH38E1657935	chr12	132904755	132905103	dELS,CTCF-bound
G01-GEA269HI	Male	chr20	310081	G	T	CTCF CTCF-Cohesin	7.13898	-	EH38E2091293	chr20	309931	310273	dELS,CTCF-bound
3A671	Female	chr9	37995108	C	T	E12 Erythroblast-like	7.11845	+	EH38E2693598	chr9	37994902	37995234	dELS,CTCF-bound
G01-GEA309HI	Male	chr16	31458073	G	A	CTCF CTCF-Cohesin	7.11834	+	EH38E1812265	chr16	31458073	31458420	PLS,CTCF-bound
G01-GEA059HI	Female	chr17	10128106	C	T	E4 Multi-tissue	7.11354	+	EH38E1846509	chr17	10127853	10128190	dELS,CTCF-bound
5L790	Male	chr17	81821912	A	G	CTCF CTCF-Cohesin	7.11067	+	EH38E1892619	chr17	81821771	81822120	dELS,CTCF-bound
G01-GEA129HI	Male	chr2	74422312	CT	C	CTCF CTCF-Cohesin	7.10799	-	EH38E2010383	chr2	74422162	74422512	pELS,CTCF-bound
3B334	Female	chr9	122123147	C	CCCTG	CTCF CTCF-Cohesin	7.09626	-	EH38E2724497	chr9	122123018	122123298	DNase-H3K4me3,CTCF-bound
4B693	Male	chr6	6915891	G	A	TF5 AR	7.08406	-	EH38E2443279	chr6	6915801	6916075	dELS,CTCF-bound
3B479	Male	chr5	147822910	A	G	CTCF CTCF-Cohesin	7.08053	-	EH38E2418789	chr5	147822722	147823047	dELS,CTCF-bound
G01-GEA149HI	Male	chr6	136289518	C	A	CTCF CTCF-Cohesin	7.06836	-	EH38E2506355	chr6	136289190	136289539	pELS,CTCF-bound
G01-GEA143HI	Female	chr3	10192241	G	A	CTCF CTCF-Cohesin	7.06668	-	EH38E2177628	chr3	10192126	10192474	dELS,CTCF-bound
G01-GEA045HI	Male	chr7	33905589	C	A	CTCF CTCF-Cohesin	7.05272	+	EH38E2547104	chr7	33905393	33905650	pELS,CTCF-bound
G01-GEA040HI	Male	chr6	30884898	CG	C	CTCF CTCF-Cohesin	7.05088	-	EH38E2458724	chr6	30884845	30885187	PLS,CTCF-bound
3C575	Male	chr6	169722678	G	C	E4 Multi-tissue	7.04285	+	EH38E2526500	chr6	169722678	169723017	pELS
3A550	Male	chr8	688179	G	C	CTCF CTCF-Cohesin	7.04045	+	EH38E2606034	chr8	688015	688198	dELS,CTCF-bound
G01-GEA154HI	Male	chr1	234964043	A	G	CTCF CTCF-Cohesin	7.03367	-	EH38E1433916	chr1	234963890	234964093	PLS,CTCF-bound
G01-GEA335HI	Male	chr2	160208246	A	G	E12 Erythroblast-like	7.03075	+	EH38E2045361	chr2	160208048	160208397	dELS
3D616	Female	chr2	27096408	TGG	T	CTCF CTCF-Cohesin	7.02415	-	EH38E1982529	chr2	27096358	27096695	dELS,CTCF-bound
5G257	Male	chr11	57781647	G	A	E12 Erythroblast-like	7.02063	+	EH38E1539792	chr11	57781545	57781893	dELS,CTCF-bound
G01-GEA336HI	Male	chr10	132458694	C	T	CTCF CTCF-Cohesin	7.01992	+	EH38E1512344	chr10	132458526	132458869	dELS,CTCF-bound
4B713	Male	chr3	133664060	G	C	CTCF CTCF-Cohesin	7.01723	+	EH38E2239584	chr3	133663765	133664100	pELS,CTCF-bound
G01-GEA045HI	Male	chrX	74292675	A	AGC	CTCF CTCF-Cohesin	7.01684	-	EH38E2758834	chrX	74292470	74292820	PLS,CTCF-bound
3C567	Male	chr2	101253272	G	A	CTCF CTCF-Cohesin	7.01052	-	EH38E2019661	chr2	101253113	101253460	pELS,CTCF-bound
3C145	Female	chr10	12068760	CGCGGAACACTTACTTGCCCCGCCCT	C	CTCF CTCF-Cohesin	7.00806	+	EH38E1448551	chr10	12068670	12069020	PLS,CTCF-bound
3D629	Male	chr22	41367481	G	A	CTCF CTCF-Cohesin	6.95183	-	EH38E2166253	chr22	41367193	41367524	PLS,CTCF-bound
G01-GEA278HI	Male	chr19	47239780	GA	G	CTCF CTCF-Cohesin	6.93904	+	EH38E1959065	chr19	47239585	47239934	dELS,CTCF-bound
G01-GEA163HI	Male	chr3	128011386	A	G	CTCF CTCF-Cohesin	6.93268	-	EH38E2236088	chr3	128011209	128011532	dELS,CTCF-bound
2F957	Male	chr15	79311205	G	A	CTCF CTCF-Cohesin	6.92989	-	EH38E1781110	chr15	79310983	79311333	PLS,CTCF-bound
3C147	Male	chr17	42311718	G	C	E4 Multi-tissue	6.92967	-	EH38E1863407	chr17	42311543	42311890	dELS,CTCF-bound
3B374	Male	chr14	39170408	C	T	P Promoter	6.92839	-	EH38E1710169	chr14	39170301	39170637	PLS,CTCF-bound
G01-GEA195HI	Male	chr20	44960336	C	A	CTCF CTCF-Cohesin	6.91726	+	EH38E2115210	chr20	44960274	44960623	PLS,CTCF-bound
G01-GEA148HI	Female	chr19	54464798	G	C	CTCF CTCF-Cohesin	6.91706	-	EH38E1964223	chr19	54464641	54464970	pELS,CTCF-bound
4B693	Male	chr12	32399733	GGGCCGCTC	G	CTCF CTCF-Cohesin	6.91673	-	EH38E1603792	chr12	32399506	32399818	PLS,CTCF-bound
G01-GEA101HI	Male	chr3	177615233	A	G	E4 Multi-tissue	6.91381	-	EH38E2260753	chr3	177615009	177615357	dELS,CTCF-bound
G01-GEA232HI	Male	chr1	76154908	C	T	CTCF CTCF-Cohesin	6.902	-	EH38E1359923	chr1	76154687	76154997	dELS,CTCF-bound
3E475	Male	chr6	13303902	C	A	E4 Multi-tissue	6.90185	-	EH38E2447290	chr6	13303753	13304029	dELS,CTCF-bound
G01-GEA070HI	Male	chr8	141727082	C	T	CTCF CTCF-Cohesin	6.8995	-	EH38E2674021	chr8	141726909	141727242	dELS,CTCF-bound
2F957	Male	chr6	46491481	A	T	E4 Multi-tissue	6.89496	-	EH38E2470776	chr6	46491289	46491623	PLS,CTCF-bound
G01-GEA173HI	Male	chr1	119712453	CGGATGCCAGCGCG	C	E4 Multi-tissue	6.88653	+	EH38E1381575	chr1	119712279	119712621	pELS,CTCF-bound
3C567	Male	chr2	237291626	C	T	E12 Erythroblast-like	6.88523	-	EH38E2087181	chr2	237291413	237291748	dELS
G01-GEA302HI	Male	chr14	81221820	C	T	CTCF CTCF-Cohesin	6.88521	-	EH38E1731687	chr14	81221721	81221970	pELS,CTCF-bound
3C567	Male	chr1	211135536	G	A	CTCF CTCF-Cohesin	6.8775	+	EH38E1419374	chr1	211135383	211135668	DNase-H3K4me3,CTCF-bound
3B374	Male	chr1	16144047	C	T	E12 Erythroblast-like	6.87252	-	EH38E1322197	chr1	16143791	16144122	dELS,CTCF-bound
G01-GEA262HI	Female	chr15	74173093	G	C	E4 Multi-tissue	6.85407	-	EH38E1777348	chr15	74173030	74173231	pELS,CTCF-bound
3B331	Male	chr2	54560497	G	C	E4 Multi-tissue	6.83399	-	EH38E1998712	chr2	54560409	54560625	dELS,CTCF-bound
3B331	Male	chr11	120710611	T	C	E4 Multi-tissue	6.83084	-	EH38E1576069	chr11	120710397	120710743	dELS,CTCF-bound
G01-GEA241HI	Male	chr14	73490975	C	CG	CTCF CTCF-Cohesin	6.81527	-	EH38E1727179	chr14	73490753	73491103	PLS,CTCF-bound
G01-GEA285HI	Male	chr17	47279270	C	T	CTCF CTCF-Cohesin	6.77989	-	EH38E1867093	chr17	47279221	47279570	pELS,CTCF-bound
3C562	Male	chr1	28552598	C	G	CTCF CTCF-Cohesin	6.76013	-	EH38E1332384	chr1	28552486	28552732	pELS,CTCF-bound
G01-GEA296HI	Male	chr1	6236102	GCCCGCCCGCCCCTC	G	CTCF CTCF-Cohesin	6.74283	+	EH38E1314225	chr1	6235829	6236178	PLS,CTCF-bound
G01-GEA050HI	Male	chr1	58885464	T	A	TF3 FOXA1 / AR / ESR1	6.73744	-	EH38E1351719	chr1	58885368	58885697	dELS,CTCF-bound
G01-GEA292HI	Male	chr6	157382091	C	G	CTCF CTCF-Cohesin	6.73318	-	EH38E2518845	chr6	157381950	157382165	pELS,CTCF-bound
G01-GEA180HI	Male	chr11	122749121	A	G	E12 Erythroblast-like	6.70841	-	EH38E1577546	chr11	122748936	122749286	dELS
G01-GEA149HI	Male	chr6	143940273	G	C	CTCF CTCF-Cohesin	6.6979	-	EH38E2511159	chr6	143940046	143940379	CTCF-only,CTCF-bound
3D630	Male	chr5	131165285	G	T	CTCF CTCF-Cohesin	6.69629	-	EH38E2407636	chr5	131165155	131165505	PLS,CTCF-bound
3C567	Male	chr3	193743837	GTT	G	CTCF CTCF-Cohesin	6.69132	+	EH38E2270308	chr3	193743809	193743973	dELS
G01-GEA154HI	Male	chr1	44819599	G	A	CTCF CTCF-Cohesin	6.6755	-	EH38E1343706	chr1	44819572	44819907	pELS,CTCF-bound
G01-GEA226HI	Female	chr2	15730606	C	T	E12 Erythroblast-like	6.6431	+	EH38E1975700	chr2	15730505	15730771	dELS,CTCF-bound
3E473	Male	chr8	38787410	G	A	CTCF CTCF-Cohesin	6.62375	-	EH38E2625815	chr8	38787305	38787566	PLS,CTCF-bound
G01-GEA124HI	Male	chr19	16324988	G	C	CTCF CTCF-Cohesin	6.62082	+	EH38E1942476	chr19	16324949	16325100	PLS,CTCF-bound
G01-GEA041HI	Female	chr1	168439950	G	A	CTCF CTCF-Cohesin	6.61699	-	EH38E1395437	chr1	168439772	168440122	dELS,CTCF-bound
G01-GEA071HI	Female	chr7	42857065	C	G	CTCF CTCF-Cohesin	6.6111	-	EH38E2552142	chr7	42856916	42857211	dELS,CTCF-bound
3D612	Male	chr1	54547832	A	G	CTCF CTCF-Cohesin	6.61035	-	EH38E1349098	chr1	54547662	54547866	pELS,CTCF-bound
G01-GEA279HI	Female	chr5	112420556	GA	G	CTCF CTCF-Cohesin	6.60536	+	EH38E2399121	chr5	112420251	112420592	pELS,CTCF-bound
G01-GEA182HI	Male	chr1	159854907	G	C	CTCF CTCF-Cohesin	6.59548	-	EH38E1389920	chr1	159854734	159855084	pELS,CTCF-bound
G01-GEA217HI	Male	chr15	63970181	C	T	E4 Multi-tissue	6.59432	+	EH38E1769565	chr15	63970040	63970388	dELS,CTCF-bound
G01-GEA249HI	Male	chr16	2015492	ATTGT	A	TF3 FOXA1 / AR / ESR1	6.58581	-	EH38E1796255	chr16	2015437	2015784	dELS,CTCF-bound
G01-GEA278HI	Male	chr7	43954704	C	T	CTCF CTCF-Cohesin	6.58365	-	EH38E2552830	chr7	43954552	43954901	dELS,CTCF-bound
3B334	Female	chr6	170049794	C	T	E4 Multi-tissue	6.58309	-	EH38E2526737	chr6	170049723	170050051	dELS
3C572	Male	chr10	5977668	C	G	CTCF CTCF-Cohesin	6.58284	-	EH38E1444892	chr10	5977474	5977817	PLS,CTCF-bound
4B858	Male	chr20	53751527	T	G	E7 Monocyte / Macrophage	6.58143	-	EH38E2122332	chr20	53751334	53751625	dELS,CTCF-bound
1D466	Female	chr6	41488703	C	T	E4 Multi-tissue	6.57531	-	EH38E2466884	chr6	41488572	41488907	dELS
G01-GEA159HI	Female	chr6	31791496	G	A	CTCF CTCF-Cohesin	6.56448	+	EH38E2459494	chr6	31791422	31791583	dELS,CTCF-bound
G01-GEA024HI	Female	chr1	166840216	G	A	CTCF CTCF-Cohesin	6.55875	-	EH38E1394148	chr1	166840120	166840270	PLS,CTCF-bound
3E465	Male	chr12	82358889	G	C	E5 B-cell-like	6.5565	-	EH38E1628429	chr12	82358663	82358959	PLS,CTCF-bound
G01-GEA071HI	Female	chr1	9162928	G	A	TF3 FOXA1 / AR / ESR1	6.55593	+	EH38E1316832	chr1	9162853	9163198	dELS,CTCF-bound
4B710	Male	chr5	56814543	GC	G	P Promoter	6.55378	+	EH38E2373765	chr5	56814391	56814630	pELS,CTCF-bound
G01-GEA289HI	Female	chr17	38749797	C	G	CTCF CTCF-Cohesin	6.54958	+	EH38E1860321	chr17	38749675	38750025	PLS,CTCF-bound
G01-GEA148HI	Female	chr7	7415408	G	A	E4 Multi-tissue	6.54881	+	EH38E2532786	chr7	7415179	7415491	dELS
4B691	Female	chr2	48316060	G	A	CTCF CTCF-Cohesin	6.52039	+	EH38E1996477	chr2	48315894	48316137	pELS,CTCF-bound
4B858	Male	chr5	125058651	A	G	E4 Multi-tissue	6.51066	-	EH38E2404888	chr5	125058482	125058829	dELS,CTCF-bound
3A550	Male	chr12	57243801	C	T	CTCF CTCF-Cohesin	6.50298	-	EH38E1616430	chr12	57243605	57243939	dELS,CTCF-bound
2J788	Male	chr8	95100546	T	C	L5 Low signal	6.5018	+	EH38E2648882	chr8	95100525	95100809	dELS
3E475	Male	chr9	136992867	G	A	CTCF CTCF-Cohesin	6.4989	-	EH38E2737422	chr9	136992593	136992941	pELS,CTCF-bound
3E475	Male	chr5	1330684	G	C	E4 Multi-tissue	6.49526	-	EH38E2352765	chr5	1330527	1330874	dELS
3E467	Female	chr9	109780182	C	G	CTCF CTCF-Cohesin	6.48802	+	EH38E2716967	chr9	109779982	109780324	PLS,CTCF-bound
G01-GEA195HI	Male	chr8	56448102	A	C	CTCF CTCF-Cohesin	6.48396	-	EH38E2632513	chr8	56448011	56448244	pELS,CTCF-bound
G01-GEA190HI	Male	chr1	39191801	T	G	CTCF CTCF-Cohesin	6.48345	+	EH38E1339207	chr1	39191668	39191893	dELS,CTCF-bound
G01-GEA267HI	Male	chr17	76103486	TCCCAACCCCACGGCCTAGCC	T	CTCF CTCF-Cohesin	6.46973	+	EH38E1886640	chr17	76103318	76103508	PLS,CTCF-bound
G01-GEA045HI	Male	chr7	30028371	GC	G	CTCF CTCF-Cohesin	6.46755	-	EH38E2544924	chr7	30028167	30028516	PLS,CTCF-bound
G01-GEA003HI	Male	chr20	57583189	T	G	CTCF CTCF-Cohesin	6.45839	+	EH38E2124650	chr20	57582928	57583242	dELS,CTCF-bound
G01-GEA015HI	Male	chr17	37745074	G	A	CTCF CTCF-Cohesin	6.45494	-	EH38E1859771	chr17	37744990	37745255	PLS,CTCF-bound
G01-GEA226HI	Female	chr13	95301839	C	A	CTCF CTCF-Cohesin	6.45429	-	EH38E1689994	chr13	95301695	95301914	pELS,CTCF-bound
G01-GEA143HI	Female	chr22	42270893	C	T	CTCF CTCF-Cohesin	6.44795	+	EH38E2167005	chr22	42270868	42271040	pELS,CTCF-bound
3D628	Male	chr12	76084672	T	A	CTCF CTCF-Cohesin	6.44751	-	EH38E1625723	chr12	76084569	76084918	PLS,CTCF-bound
G01-GEA154HI	Male	chr8	100681033	C	T	CTCF CTCF-Cohesin	6.43488	-	EH38E2652174	chr8	100680924	100681203	dELS,CTCF-bound
G01-GEA217HI	Male	chr15	89496412	T	C	CTCF CTCF-Cohesin	6.43296	+	EH38E1786748	chr15	89496261	89496569	PLS,CTCF-bound
3C562	Male	chr9	127637729	C	T	E4 Multi-tissue	6.41927	+	EH38E2728648	chr9	127637484	127637786	dELS
G01-GEA309HI	Male	chr1	41361262	C	T	CTCF CTCF-Cohesin	6.40823	-	EH38E1340844	chr1	41361027	41361374	pELS,CTCF-bound
G01-GEA266HI	Male	chr16	87769386	C	T	CTCF CTCF-Cohesin	6.39869	-	EH38E1836416	chr16	87769260	87769458	dELS,CTCF-bound
3C562	Male	chr10	109982286	T	C	E4 Multi-tissue	6.39162	+	EH38E1498433	chr10	109982118	109982464	dELS
G01-GEA281HI	Male	chr19	2156155	G	A	CTCF CTCF-Cohesin	6.38504	-	EH38E1932068	chr19	2155994	2156344	dELS,CTCF-bound
G01-GEA027HI	Male	chr9	86283131	A	G	CTCF CTCF-Cohesin	6.38253	+	EH38E2703240	chr9	86282944	86283294	pELS,CTCF-bound
G01-GEA266HI	Male	chr2	72143276	G	A	E4 Multi-tissue	6.37833	+	EH38E2009113	chr2	72143064	72143390	PLS,CTCF-bound
G01-GEA241HI	Male	chr19	47239784	C	T	CTCF CTCF-Cohesin	6.37574	+	EH38E1959065	chr19	47239585	47239934	dELS,CTCF-bound
G01-GEA001HI	Male	chr1	15090587	C	T	CTCF CTCF-Cohesin	6.37567	-	EH38E1321184	chr1	15090396	15090742	dELS
G01-GEA120HI	Male	chr4	78056789	C	T	E4 Multi-tissue	6.37037	-	EH38E2305845	chr4	78056716	78057064	pELS,CTCF-bound
G01-GEA111HI	Male	chr15	78375251	T	A	E7 Monocyte / Macrophage	6.366	-	EH38E1780533	chr15	78375012	78375340	dELS
G01-GEA263HI	Female	chr20	47317423	G	A	E12 Erythroblast-like	6.36444	-	EH38E2116860	chr20	47317300	47317638	pELS,CTCF-bound
G01-GEA023HI	Male	chr10	79094235	GTT	G	TF3 FOXA1 / AR / ESR1	6.35913	-	EH38E1482357	chr10	79094097	79094338	dELS,CTCF-bound
3C565	Male	chr7	141072573	C	T	E4 Multi-tissue	6.35363	-	EH38E2596736	chr7	141072369	141072719	pELS,CTCF-bound
G01-GEA278HI	Male	chr16	11102423	A	G	CTCF CTCF-Cohesin	6.34972	+	EH38E1801500	chr16	11102121	11102469	dELS,CTCF-bound
G01-GEA185HI	Female	chr20	1266363	C	T	CTCF CTCF-Cohesin	6.34331	-	EH38E2091942	chr20	1266091	1266441	PLS,CTCF-bound
3B374	Male	chr3	86774363	TCTTTCTTGAATTACATTTTATATATA	T	CTCF CTCF-Cohesin	6.33986	+	EH38E2218460	chr3	86774223	86774417	CTCF-only,CTCF-bound
G01-GEA025HI	Male	chr11	127003437	G	C	CTCF CTCF-Cohesin	6.3323	-	EH38E1580309	chr11	127003342	127003604	PLS,CTCF-bound
G01-GEA159HI	Female	chr18	268519	C	A	CTCF CTCF-Cohesin	6.32549	+	EH38E1894317	chr18	268373	268608	pELS,CTCF-bound
G01-GEA307HI	Female	chr1	39559681	G	C	CTCF CTCF-Cohesin	6.32524	-	EH38E1339489	chr1	39559469	39559814	pELS,CTCF-bound
G01-GEA239HI	Male	chr14	73718140	C	T	E4 Multi-tissue	6.32017	+	EH38E1727301	chr14	73718030	73718300	dELS,CTCF-bound
3B335	Male	chr5	7816450	G	A	CTCF CTCF-Cohesin	6.31963	-	EH38E2355523	chr5	7816248	7816598	dELS,CTCF-bound
G01-GEA003HI	Male	chr20	62954319	C	T	E4 Multi-tissue	6.31935	-	EH38E2128755	chr20	62954221	62954571	pELS,CTCF-bound
G01-GEA104HI	Male	chr4	139556250	AGAG	A	CTCF CTCF-Cohesin	6.31834	-	EH38E2329942	chr4	139556185	139556535	PLS,CTCF-bound
G01-GEA027HI	Male	chr5	151239441	G	C	CTCF CTCF-Cohesin	6.31148	-	EH38E2421724	chr5	151239260	151239609	dELS,CTCF-bound
2J788	Male	chr1	202105724	T	C	E4 Multi-tissue	6.31031	+	EH38E1412374	chr1	202105537	202105812	dELS
4B702	Male	chr1	19505124	GGACC	G	E4 Multi-tissue	6.30636	+	EH38E1324708	chr1	19504943	19505291	dELS,CTCF-bound
4B858	Male	chr5	87267673	C	G	CTCF CTCF-Cohesin	6.30299	+	EH38E2388720	chr5	87267581	87267931	PLS,CTCF-bound
3E475	Male	chr11	68380663	CGCAGTGGGGCGTGTCCTGCAT	C	CTCF CTCF-Cohesin	6.30015	-	EH38E1547901	chr11	68380385	68380735	dELS,CTCF-bound
5L790	Male	chr19	37656217	C	A	CTCF CTCF-Cohesin	6.29107	+	EH38E1951920	chr19	37656204	37656370	PLS,CTCF-bound
G01-GEA283HI	Male	chr10	27504582	G	A	CTCF CTCF-Cohesin	6.28255	-	EH38E1457065	chr10	27504382	27504605	PLS,CTCF-bound
G01-GEA248HI	Male	chr8	48172295	A	G	CTCF CTCF-Cohesin	6.27898	-	EH38E2629290	chr8	48172181	48172469	dELS,CTCF-bound
3B331	Male	chr3	173395630	G	T	P Promoter	6.278	-	EH38E2258873	chr3	173395397	173395747	dELS,CTCF-bound
G01-GEA258HI	Female	chr11	110296727	G	GCCGCCCCCGCC	CTCF CTCF-Cohesin	6.26741	-	EH38E1568577	chr11	110296434	110296774	PLS,CTCF-bound
3C145	Female	chr22	36239645	A	G	CTCF CTCF-Cohesin	6.26658	-	EH38E2161606	chr22	36239459	36239807	PLS,CTCF-bound
G01-GEA129HI	Male	chr6	26033682	T	C	P Promoter	6.24483	-	EH38E2455678	chr6	26033587	26033935	PLS,CTCF-bound
G01-GEA028HI	Male	chr21	43712756	A	G	E12 Erythroblast-like	6.24392	-	EH38E2145541	chr21	43712659	43712829	dELS,CTCF-bound
G01-GEA190HI	Male	chr6	35490192	C	G	CTCF CTCF-Cohesin	6.24229	+	EH38E2462488	chr6	35490107	35490435	dELS,CTCF-bound
G01-GEA180HI	Male	chr12	12357143	CGGCCGCA	C	CTCF CTCF-Cohesin	6.24026	-	EH38E1593404	chr12	12356879	12357228	PLS,CTCF-bound
G01-GEA120HI	Male	chr4	2413204	G	A	CTCF CTCF-Cohesin	6.23293	-	EH38E2275571	chr4	2413051	2413401	dELS,CTCF-bound
3E473	Male	chr2	231365485	G	T	TF3 FOXA1 / AR / ESR1	6.23032	-	EH38E2082732	chr2	231365314	231365584	dELS,CTCF-bound
G01-GEA161HI	Male	chr11	63767741	G	T	E4 Multi-tissue	6.22885	-	EH38E1543415	chr11	63767434	63767774	pELS,CTCF-bound
4B710	Male	chr1	6448888	C	T	CTCF CTCF-Cohesin	6.22427	+	EH38E1314465	chr1	6448756	6449097	pELS,CTCF-bound
G01-GEA139HI	Male	chr6	97215228	C	G	CTCF CTCF-Cohesin	6.22375	-	EH38E2487476	chr6	97215155	97215330	dELS,CTCF-bound
G01-GEA090HI	Male	chr17	1618029	C	T	E12 Erythroblast-like	6.22219	-	EH38E1840148	chr17	1617821	1618168	dELS,CTCF-bound
G01-GEA248HI	Male	chr20	59042990	A	C	CTCF CTCF-Cohesin	6.21668	+	EH38E2125949	chr20	59042777	59043125	PLS,CTCF-bound
G01-GEA313HI	Male	chr4	74793924	C	G	CTCF CTCF-Cohesin	6.21339	-	EH38E2304055	chr4	74793859	74794105	pELS,CTCF-bound
G01-GEA071HI	Female	chr5	50666498	G	A	E4 Multi-tissue	6.21253	+	EH38E2370447	chr5	50666359	50666526	pELS,CTCF-bound
G01-GEA313HI	Male	chr18	22223833	G	C	CTCF CTCF-Cohesin	6.21182	+	EH38E1903177	chr18	22223692	22224041	dELS,CTCF-bound
G01-GEA263HI	Female	chr4	138259963	C	T	E4 Multi-tissue	6.20156	-	EH38E2329183	chr4	138259856	138260195	dELS
G01-GEA028HI	Male	chr9	127608168	A	AC	E11 T-cell	6.19841	+	EH38E2728621	chr9	127608131	127608286	dELS,CTCF-bound
G01-GEA124HI	Male	chr19	1246091	G	A	TF5 AR	6.18024	-	EH38E1931015	chr19	1245809	1246159	dELS,CTCF-bound
G01-GEA154HI	Male	chr19	49085403	C	G	E5 B-cell-like	6.17949	-	EH38E1960570	chr19	49085168	49085516	PLS,CTCF-bound
G01-GEA028HI	Male	chr17	8226255	C	CA	E4 Multi-tissue	6.17895	-	EH38E1845133	chr17	8226083	8226432	dELS
G01-GEA337HI	Male	chr2	204012184	C	T	E4 Multi-tissue	6.17746	+	EH38E2067691	chr2	204012144	204012482	dELS
G01-GEA209HI	Male	chr6	11188339	G	A	E4 Multi-tissue	6.17608	-	EH38E2445590	chr6	11188232	11188476	dELS
G01-GEA152HI	Male	chr7	159030985	C	T	CTCF CTCF-Cohesin	6.1692	-	EH38E2605548	chr7	159030894	159031068	dELS,CTCF-bound
G01-GEA264HI	Male	chr1	41516189	C	CTTCCCA	E12 Erythroblast-like	6.16436	-	EH38E1341057	chr1	41516087	41516434	dELS,CTCF-bound
3C572	Male	chr2	28751817	G	C	CTCF CTCF-Cohesin	6.16047	-	EH38E1983901	chr2	28751576	28751925	PLS,CTCF-bound
3D632	Male	chr11	67640165	C	T	CTCF CTCF-Cohesin	6.1489	-	EH38E1547351	chr11	67640075	67640311	pELS,CTCF-bound
G01-GEA219HI	Male	chr1	54273526	G	A	TF3 FOXA1 / AR / ESR1	6.14704	+	EH38E1348801	chr1	54273402	54273749	dELS,CTCF-bound
3C575	Male	chr10	24952889	C	T	CTCF CTCF-Cohesin	6.14507	+	EH38E1456011	chr10	24952706	24953050	pELS,CTCF-bound
G01-GEA136HI	Male	chr1	19644093	C	G	CTCF CTCF-Cohesin	6.14265	+	EH38E1324808	chr1	19644065	19644415	PLS,CTCF-bound
G01-GEA310HI	Male	chr2	75200322	G	A	E4 Multi-tissue	6.13738	-	EH38E2010983	chr2	75200189	75200533	pELS,CTCF-bound
1D466	Female	chr4	53908827	T	C	CTCF CTCF-Cohesin	6.13702	-	EH38E2297279	chr4	53908682	53909029	dELS,CTCF-bound
G01-GEA214HI	Male	chr5	123512125	A	C	CTCF CTCF-Cohesin	6.13663	+	EH38E2403835	chr5	123511913	123512262	PLS,CTCF-bound
G01-GEA214HI	Male	chr20	266767	A	G	E12 Erythroblast-like	6.13388	-	EH38E2091261	chr20	266704	266905	pELS,CTCF-bound
G01-GEA143HI	Female	chr8	66459922	G	A	CTCF CTCF-Cohesin	6.13067	-	EH38E2637144	chr8	66459878	66460033	dELS,CTCF-bound
3C546	Male	chr11	75352326	G	A	E12 Erythroblast-like	6.13043	-	EH38E1553051	chr11	75352239	75352589	pELS,CTCF-bound
G01-GEA191HI	Male	chr12	123233642	C	T	CTCF CTCF-Cohesin	6.12737	-	EH38E1652304	chr12	123233533	123233742	PLS,CTCF-bound
G01-GEA206HI	Male	chr2	224485453	TTCC	T	E4 Multi-tissue	6.11788	-	EH38E2079069	chr2	224485373	224485723	dELS,CTCF-bound
G01-GEA129HI	Male	chr21	35051481	C	T	CTCF CTCF-Cohesin	6.11405	-	EH38E2139357	chr21	35051314	35051664	dELS,CTCF-bound
G01-GEA111HI	Male	chr12	121627418	G	T	CTCF CTCF-Cohesin	6.11057	-	EH38E1650881	chr12	121627304	121627654	pELS,CTCF-bound
2F957	Male	chr8	128794589	G	A	E4 Multi-tissue	6.10896	-	EH38E2667196	chr8	128794503	128794842	dELS,CTCF-bound
G01-GEA240HI	Female	chr17	47275671	CTGGGAGGCTGTGTTTATCA	C	E12 Erythroblast-like	6.09233	-	EH38E1867088	chr17	47275607	47275956	dELS,CTCF-bound
2F957	Male	chr2	41932639	G	C	E4 Multi-tissue	6.09046	+	EH38E1991199	chr2	41932316	41932657	pELS,CTCF-bound
4B696	Male	chr2	98731232	GGCCCCGCGCCCCGC	G	CTCF CTCF-Cohesin	6.08702	+	EH38E2017977	chr2	98730984	98731312	PLS,CTCF-bound
G01-GEA209HI	Male	chr17	81097554	G	GGGAGGCCGCCCCCTTGC	CTCF CTCF-Cohesin	6.08695	+	EH38E1891822	chr17	81097347	81097696	pELS,CTCF-bound
G01-GEA334HI	Male	chr3	44555346	A	G	CTCF CTCF-Cohesin	6.0851	-	EH38E2196736	chr3	44555301	44555471	PLS,CTCF-bound
3C565	Male	chr7	100802050	GCGCTTA	G	E12 Erythroblast-like	6.07552	-	EH38E2575913	chr7	100801963	100802187	dELS,CTCF-bound
G01-GEA285HI	Male	chr22	37686578	C	T	CTCF CTCF-Cohesin	6.07485	-	EH38E2163075	chr22	37686513	37686667	PLS,CTCF-bound
3E475	Male	chr10	132396156	C	T	CTCF CTCF-Cohesin	6.06899	+	EH38E1512243	chr10	132395964	132396250	pELS,CTCF-bound
3G089	Male	chr6	35920330	AC	A	CTCF CTCF-Cohesin	6.0667	+	EH38E2462814	chr6	35920182	35920392	pELS,CTCF-bound
5L790	Male	chr9	128636213	T	C	CTCF CTCF-Cohesin	6.06038	-	EH38E2729732	chr9	128636025	128636306	dELS,CTCF-bound
G01-GEA111HI	Male	chr7	75866629	TCA	T	CTCF CTCF-Cohesin	6.04937	-	EH38E2564371	chr7	75866549	75866890	dELS,CTCF-bound
4B699	Male	chr12	31589868	G	C	CTCF CTCF-Cohesin	6.04754	-	EH38E1603213	chr12	31589758	31590000	pELS,CTCF-bound
3D629	Male	chr6	167825922	C	T	CTCF CTCF-Cohesin	6.03731	-	EH38E2525208	chr6	167825705	167825969	pELS,CTCF-bound
2H163	Male	chr1	149885916	GGC	G	CTCF CTCF-Cohesin	6.03423	+	EH38E1383192	chr1	149885589	149885939	pELS,CTCF-bound
3B336	Male	chr12	116881158	C	G	CTCF CTCF-Cohesin	6.02993	-	EH38E1648026	chr12	116880930	116881277	pELS,CTCF-bound
G01-GEA313HI	Male	chr19	4724717	T	G	CTCF CTCF-Cohesin	6.02668	+	EH38E1934429	chr19	4724521	4724871	pELS,CTCF-bound
G01-GEA103HI	Male	chr19	38736233	C	CGGCGGGCGCTGAGG	CTCF CTCF-Cohesin	6.02458	+	EH38E1952761	chr19	38736010	38736359	dELS,CTCF-bound
3C545	Male	chr11	83194730	T	C	E4 Multi-tissue	6.01434	-	EH38E1557181	chr11	83194493	83194822	PLS,CTCF-bound
3B479	Male	chr3	196196791	G	A	CTCF CTCF-Cohesin	6.01391	-	EH38E2272515	chr3	196196604	196196947	dELS,CTCF-bound
3C563	Male	chr17	41930460	C	T	CTCF CTCF-Cohesin	6.00757	-	EH38E1863042	chr17	41930364	41930714	PLS,CTCF-bound
G01-GEA139HI	Male	chr3	189270432	T	C	CTCF CTCF-Cohesin	6.00461	+	EH38E2268040	chr3	189270326	189270497	dELS,CTCF-bound
G01-GEA163HI	Male	chr9	37904220	TCGGCCCG	T	CTCF CTCF-Cohesin	5.9953	+	EH38E2693474	chr9	37904103	37904453	PLS,CTCF-bound
G01-GEA264HI	Male	chr2	200510120	G	A	CTCF CTCF-Cohesin	5.99201	-	EH38E2065437	chr2	200509891	200510211	PLS,CTCF-bound
G01-GEA163HI	Male	chr11	58788613	A	T	CTCF CTCF-Cohesin	5.99037	-	EH38E1540131	chr11	58788368	58788654	dELS,CTCF-bound
3D317	Female	chr8	70607606	C	G	P Promoter	5.97739	+	EH38E2639166	chr8	70607560	70607909	PLS,CTCF-bound
G01-GEA167HI	Male	chr12	59597068	T	C	CTCF CTCF-Cohesin	5.97674	+	EH38E1617774	chr12	59596902	59597127	PLS,CTCF-bound
3E475	Male	chr1	3186772	C	G	TF3 FOXA1 / AR / ESR1	5.97038	+	EH38E1312437	chr1	3186558	3186906	dELS,CTCF-bound
2F730	Male	chr9	5450591	CT	C	CTCF CTCF-Cohesin	5.96805	-	EH38E2679714	chr9	5450317	5450662	PLS,CTCF-bound
2K890	Male	chr4	184453547	G	T	CTCF CTCF-Cohesin	5.96642	-	EH38E2348940	chr4	184453482	184453830	dELS
G01-GEA023HI	Male	chr5	172647054	A	T	CTCF CTCF-Cohesin	5.96601	-	EH38E2432171	chr5	172646945	172647144	dELS,CTCF-bound
G01-GEA074HI	Male	chr3	24640467	A	G	CTCF CTCF-Cohesin	5.95954	-	EH38E2186116	chr3	24640229	24640571	dELS,CTCF-bound
G01-GEA292HI	Male	chr15	39920381	G	A	CTCF CTCF-Cohesin	5.95809	+	EH38E1755405	chr15	39920108	39920445	PLS,CTCF-bound
G01-GEA025HI	Male	chr5	140175684	C	G	CTCF CTCF-Cohesin	5.95732	-	EH38E2414071	chr5	140175434	140175772	pELS,CTCF-bound
5B577	Male	chr5	93620715	A	G	CTCF CTCF-Cohesin	5.95717	-	EH38E2391618	chr5	93620509	93620856	PLS,CTCF-bound
G01-GEA147HI	Male	chr19	11624831	G	C	CTCF CTCF-Cohesin	5.95692	-	EH38E1939369	chr19	11624675	11624941	dELS,CTCF-bound
G01-GEA208HI	Male	chr11	18527233	G	C	E4 Multi-tissue	5.95372	+	EH38E1525275	chr11	18527107	18527267	PLS,CTCF-bound
G01-GEA195HI	Male	chr12	50401342	G	A	CTCF CTCF-Cohesin	5.93225	+	EH38E1610954	chr12	50401264	50401421	pELS,CTCF-bound
G01-GEA301HI	Male	chr18	61893162	G	A	CTCF CTCF-Cohesin	5.92929	-	EH38E1922192	chr18	61892895	61893245	pELS,CTCF-bound
G01-GEA043HI	Male	chr1	185596276	A	G	CTCF CTCF-Cohesin	5.92801	-	EH38E1405550	chr1	185596128	185596398	dELS,CTCF-bound
G01-GEA147HI	Male	chr3	54891683	C	A	E12 Erythroblast-like	5.92641	+	EH38E2203891	chr3	54891593	54891941	dELS,CTCF-bound
G01-GEA182HI	Male	chr4	25863525	C	G	CTCF CTCF-Cohesin	5.92469	-	EH38E2287439	chr4	25863448	25863798	PLS,CTCF-bound
2F867	Male	chr5	16881391	GCCCTTTGTTGACACAGT	G	TF3 FOXA1 / AR / ESR1	5.92458	-	EH38E2359901	chr5	16881296	16881615	dELS
G01-GEA269HI	Male	chr1	85464505	A	ACCCACCTGCCCACCCACCTGC	CTCF CTCF-Cohesin	5.92095	-	EH38E1363881	chr1	85464500	85464841	pELS,CTCF-bound
2F730	Male	chr7	87600962	A	G	P Promoter	5.92014	-	EH38E2569591	chr7	87600756	87601104	PLS,CTCF-bound
G01-GEA263HI	Female	chr1	222712527	C	G	E5 B-cell-like	5.91272	-	EH38E1425432	chr1	222712440	222712672	PLS,CTCF-bound
G01-GEA001HI	Male	chr3	124887613	G	C	CTCF CTCF-Cohesin	5.88848	+	EH38E2234003	chr3	124887592	124887749	pELS,CTCF-bound
3E467	Female	chr1	234608538	C	T	CTCF CTCF-Cohesin	5.88753	-	EH38E1433494	chr1	234608424	234608673	pELS,CTCF-bound
3C546	Male	chr10	122648895	G	T	CTCF CTCF-Cohesin	5.88364	+	EH38E1506582	chr10	122648716	122649040	CTCF-only,CTCF-bound
3E480	Male	chr16	56425636	G	A	CTCF CTCF-Cohesin	5.88011	-	EH38E1817933	chr16	56425384	56425732	PLS,CTCF-bound
G01-GEA025HI	Male	chr20	62667200	T	C	E4 Multi-tissue	5.87146	-	EH38E2128380	chr20	62667016	62667295	pELS,CTCF-bound
G01-GEA150HI	Male	chr11	75554675	A	C	E12 Erythroblast-like	5.86405	-	EH38E1553264	chr11	75554365	75554714	dELS,CTCF-bound
G01-GEA292HI	Male	chr1	11806446	G	C	E4 Multi-tissue	5.85958	+	EH38E1319124	chr1	11806340	11806504	PLS,CTCF-bound
G01-GEA161HI	Male	chr8	77000314	G	C	E5 B-cell-like	5.82381	-	EH38E2641778	chr8	77000097	77000437	PLS,CTCF-bound
G01-GEA167HI	Male	chr14	56579801	C	T	E12 Erythroblast-like	5.81711	-	EH38E1716860	chr14	56579664	56579846	PLS,CTCF-bound
G01-GEA027HI	Male	chr7	151010667	C	G	CTCF CTCF-Cohesin	5.81445	+	EH38E2601082	chr7	151010392	151010692	dELS,CTCF-bound
G01-GEA050HI	Male	chr17	40309136	GT	G	CTCF CTCF-Cohesin	5.81407	+	EH38E1861627	chr17	40309078	40309241	PLS,CTCF-bound
3C565	Male	chr7	101170064	A	G	CTCF CTCF-Cohesin	5.81035	+	EH38E2576233	chr7	101169806	101170147	DNase-H3K4me3,CTCF-bound
3C554	Male	chr11	71206410	T	C	E4 Multi-tissue	5.79817	-	EH38E1549993	chr11	71206196	71206543	dELS,CTCF-bound
G01-GEA148HI	Female	chr1	145892356	C	T	CTCF CTCF-Cohesin	5.79032	-	EH38E1382208	chr1	145892027	145892377	pELS,CTCF-bound
G01-GEA149HI	Male	chr8	60961494	AG	A	E4 Multi-tissue	5.77993	-	EH38E2634888	chr8	60961339	60961682	dELS,CTCF-bound
G01-GEA313HI	Male	chr11	86956099	C	T	CTCF CTCF-Cohesin	5.77141	+	EH38E1559140	chr11	86955874	86956224	pELS,CTCF-bound
3D615	Male	chr7	6393443	CAG	C	CTCF CTCF-Cohesin	5.76957	+	EH38E2532233	chr7	6393335	6393685	dELS
G01-GEA251HI	Male	chr1	214281971	A	G	E4 Multi-tissue	5.75499	-	EH38E1421251	chr1	214281886	214282094	pELS,CTCF-bound
G01-GEA279HI	Female	chr5	98927409	T	A	CTCF CTCF-Cohesin	5.75401	+	EH38E2394253	chr5	98927210	98927560	pELS,CTCF-bound
3A550	Male	chr1	112701003	C	CT	CTCF CTCF-Cohesin	5.75088	-	EH38E1377166	chr1	112700783	112701086	dELS,CTCF-bound
5G257	Male	chr7	95772454	C	A	CTCF CTCF-Cohesin	5.75036	-	EH38E2573228	chr7	95772366	95772716	PLS,CTCF-bound
4B699	Male	chr3	52004383	G	A	CTCF CTCF-Cohesin	5.74837	-	EH38E2201934	chr3	52004276	52004548	dELS,CTCF-bound
G01-GEA135HI	Male	chr4	155760042	G	T	CTCF CTCF-Cohesin	5.74143	-	EH38E2338372	chr4	155759754	155760103	pELS,CTCF-bound
G01-GEA001HI	Male	chr7	100894924	C	G	CTCF CTCF-Cohesin	5.73658	+	EH38E2576022	chr7	100894809	100895152	pELS,CTCF-bound
2F867	Male	chr1	100464141	TG	T	E7 Monocyte / Macrophage	5.73184	-	EH38E1371738	chr1	100463884	100464213	dELS,CTCF-bound
2K890	Male	chr6	143673837	C	G	E4 Multi-tissue	5.73086	-	EH38E2510982	chr6	143673674	143674007	dELS
G01-GEA186HI	Female	chr1	172533437	TGAA	T	CTCF CTCF-Cohesin	5.73079	+	EH38E1397819	chr1	172533375	172533636	pELS,CTCF-bound
G01-GEA193HI	Male	chr9	120935607	C	T	E4 Multi-tissue	5.72403	-	EH38E2723466	chr9	120935410	120935752	dELS,CTCF-bound
G01-GEA186HI	Female	chr19	48619147	G	A	CTCF CTCF-Cohesin	5.72393	+	EH38E1960115	chr19	48618799	48619149	PLS,CTCF-bound
G01-GEA012HI	Female	chr15	92638425	A	G	TF3 FOXA1 / AR / ESR1	5.71557	-	EH38E1788962	chr15	92638254	92638545	pELS,CTCF-bound
3C562	Male	chr11	6405466	C	G	E4 Multi-tissue	5.7146	-	EH38E1517398	chr11	6405316	6405618	PLS
G01-GEA024HI	Female	chr10	29849716	A	G	E7 Monocyte / Macrophage	5.70209	-	EH38E1458627	chr10	29849526	29849874	dELS,CTCF-bound
G01-GEA139HI	Male	chr14	96054084	G	A	E12 Erythroblast-like	5.69947	+	EH38E1739503	chr14	96053977	96054327	dELS
G01-GEA266HI	Male	chr12	27711056	G	A	CTCF CTCF-Cohesin	5.69527	+	EH38E1601311	chr12	27710995	27711166	pELS,CTCF-bound
G01-GEA185HI	Female	chr8	22054236	C	G	CTCF CTCF-Cohesin	5.69387	-	EH38E2616027	chr8	22054038	22054388	pELS,CTCF-bound
G01-GEA110HI	Female	chr19	1065076	C	T	CTCF CTCF-Cohesin	5.69064	-	EH38E1930764	chr19	1064903	1065225	pELS,CTCF-bound
G01-GEA045HI	Male	chr3	184242015	TGCTACA	T	CTCF CTCF-Cohesin	5.68471	-	EH38E2264262	chr3	184241829	184242179	pELS,CTCF-bound
G01-GEA163HI	Male	chr2	137866136	C	G	CTCF CTCF-Cohesin	5.68422	-	EH38E2035978	chr2	137866049	137866267	CTCF-only,CTCF-bound
G01-GEA260HI	Male	chr1	202710476	G	C	CTCF CTCF-Cohesin	5.68113	+	EH38E1412890	chr1	202710343	202710659	PLS,CTCF-bound
G01-GEA263HI	Female	chr15	84915081	A	G	CTCF CTCF-Cohesin	5.6758	+	EH38E1784114	chr15	84915001	84915345	dELS,CTCF-bound
G01-GEA186HI	Female	chr1	53183536	T	C	E12 Erythroblast-like	5.66009	-	EH38E1348011	chr1	53183300	53183649	dELS,CTCF-bound
G01-GEA235HI	Male	chrX	71182262	A	C	E12 Erythroblast-like	5.64484	-	EH38E2758034	chrX	71181948	71182298	dELS,CTCF-bound
XH678	Male	chr10	89414696	C	G	P Promoter	5.64194	-	EH38E1487160	chr10	89414564	89414903	PLS,CTCF-bound
G01-GEA180HI	Male	chr22	36361190	ATGT	A	TF3 FOXA1 / AR / ESR1	5.6399	-	EH38E2161757	chr22	36361050	36361334	dELS
G01-GEA302HI	Male	chr15	42057110	G	C	CTCF CTCF-Cohesin	5.63276	-	EH38E1757109	chr15	42056966	42057316	dELS,CTCF-bound
G01-GEA100HI	Male	chr11	65919916	C	G	CTCF CTCF-Cohesin	5.63258	+	EH38E1545727	chr11	65919894	65920084	pELS,CTCF-bound
G01-GEA226HI	Female	chr12	110743172	G	T	CTCF CTCF-Cohesin	5.63134	+	EH38E1644085	chr12	110742852	110743202	PLS,CTCF-bound
G01-GEA302HI	Male	chr14	34630197	CGGGGCGGAGGCGAA	C	E5 B-cell-like	5.62778	-	EH38E1708086	chr14	34630004	34630354	PLS,CTCF-bound
G01-GEA264HI	Male	chr17	76529914	G	C	E12 Erythroblast-like	5.62595	-	EH38E1887130	chr17	76529700	76529969	dELS,CTCF-bound
G01-GEA296HI	Male	chr1	117060094	C	T	CTCF CTCF-Cohesin	5.61904	-	EH38E1380195	chr1	117059973	117060321	PLS,CTCF-bound
G01-GEA161HI	Male	chr2	66425723	G	A	PC4 Polycomb / Bivalent stem cell Enh	5.61457	-	EH38E2005170	chr2	66425664	66425907	dELS,CTCF-bound
3G089	Male	chr7	74306978	G	T	E12 Erythroblast-like	5.61438	-	EH38E2563742	chr7	74306815	74307165	dELS,CTCF-bound
3C573	Male	chr17	27456122	G	A	CTCF CTCF-Cohesin	5.61095	+	EH38E1853163	chr17	27455933	27456175	dELS,CTCF-bound
G01-GEA207HI	Male	chr8	57855485	G	A	E4 Multi-tissue	5.59989	-	EH38E2633097	chr8	57855256	57855603	dELS
G01-GEA104HI	Male	chr17	50151113	C	T	CTCF CTCF-Cohesin	5.5972	-	EH38E1869675	chr17	50150972	50151321	pELS,CTCF-bound
G01-GEA220HI	Male	chr17	16486403	T	C	CTCF CTCF-Cohesin	5.58861	+	EH38E1849459	chr17	16486381	16486553	dELS,CTCF-bound
3D629	Male	chr3	47802318	C	A	TF3 FOXA1 / AR / ESR1	5.58702	+	EH38E2199129	chr3	47802226	47802575	pELS,CTCF-bound
3A550	Male	chr2	69013297	C	G	CTCF CTCF-Cohesin	5.58667	+	EH38E2006834	chr2	69013171	69013400	PLS,CTCF-bound
G01-GEA103HI	Male	chr6	12332119	T	C	TF3 FOXA1 / AR / ESR1	5.58142	-	EH38E2446655	chr6	12332005	12332354	dELS
4B713	Male	chr20	44910073	G	C	E4 Multi-tissue	5.58049	-	EH38E2115178	chr20	44909823	44910161	PLS,CTCF-bound
3D630	Male	chr9	35489871	T	C	CTCF CTCF-Cohesin	5.57881	-	EH38E2691772	chr9	35489821	35490156	dELS,CTCF-bound
G01-GEA132HI	Male	chr18	70464917	A	G	CTCF CTCF-Cohesin	5.57506	-	EH38E1925553	chr18	70464760	70465102	dELS,CTCF-bound
3B336	Male	chr16	15055827	C	T	CTCF CTCF-Cohesin	5.57438	-	EH38E1804106	chr16	15055748	15055911	pELS,CTCF-bound
G01-GEA180HI	Male	chr5	109485182	C	T	E4 Multi-tissue	5.5667	+	EH38E2397671	chr5	109484995	109485339	dELS,CTCF-bound
3C139	Male	chr1	8879478	C	T	CTCF CTCF-Cohesin	5.55578	-	EH38E1316580	chr1	8879405	8879677	pELS,CTCF-bound
G01-GEA114HI	Male	chr19	12766147	C	G	CTCF CTCF-Cohesin	5.54935	-	EH38E1939899	chr19	12766003	12766348	pELS,CTCF-bound
G01-GEA027HI	Male	chr4	83455661	C	A	CTCF CTCF-Cohesin	5.54436	-	EH38E2308613	chr4	83455318	83455667	pELS,CTCF-bound
4B713	Male	chr6	122610830	G	T	CTCF CTCF-Cohesin	5.54248	-	EH38E2499189	chr6	122610714	122611024	pELS,CTCF-bound
2F867	Male	chr17	75996907	G	C	E4 Multi-tissue	5.54166	-	EH38E1886525	chr17	75996800	75996954	dELS,CTCF-bound
G01-GEA186HI	Female	chr15	90165910	C	G	E5 B-cell-like	5.53897	-	EH38E1787263	chr15	90165699	90166042	pELS,CTCF-bound
G01-GEA287HI	Male	chr9	136646589	G	A	E12 Erythroblast-like	5.53833	-	EH38E2736933	chr9	136646371	136646719	dELS,CTCF-bound
3E473	Male	chr15	40323637	C	G	CTCF CTCF-Cohesin	5.53385	+	EH38E1755801	chr15	40323314	40323655	pELS,CTCF-bound
G01-GEA158HI	Male	chr16	71895464	G	A	E5 B-cell-like	5.529	-	EH38E1826082	chr16	71895197	71895547	PLS,CTCF-bound
G01-GEA278HI	Male	chr8	32548156	C	T	CTCF CTCF-Cohesin	5.52871	+	EH38E2622892	chr8	32547962	32548312	PLS,CTCF-bound
3E467	Female	chr3	42507442	C	T	TF3 FOXA1 / AR / ESR1	5.52858	-	EH38E2195402	chr3	42507343	42507692	dELS,CTCF-bound
G01-GEA264HI	Male	chr2	199459721	C	G	CTCF CTCF-Cohesin	5.52492	-	EH38E2064783	chr2	199459499	199459773	pELS,CTCF-bound
5L790	Male	chr3	169966954	AGGTGG	A	CTCF CTCF-Cohesin	5.52475	+	EH38E2256526	chr3	169966950	169967118	pELS,CTCF-bound
G01-GEA327HI	Male	chr3	150408908	GCCT	G	P Promoter	5.52379	-	EH38E2248001	chr3	150408811	150409157	pELS,CTCF-bound
5L790	Male	chr5	131634875	A	T	CTCF CTCF-Cohesin	5.52105	+	EH38E2407971	chr5	131634626	131634956	pELS,CTCF-bound
G01-GEA043HI	Male	chr16	58000923	G	C	E4 Multi-tissue	5.5193	+	EH38E1819391	chr16	58000610	58000950	pELS,CTCF-bound
3C546	Male	chr9	3526441	C	T	CTCF CTCF-Cohesin	5.51299	-	EH38E2678528	chr9	3526384	3526596	pELS,CTCF-bound
5L790	Male	chr1	212286263	A	G	CTCF CTCF-Cohesin	5.51116	+	EH38E1420134	chr1	212286037	212286387	pELS,CTCF-bound
G01-GEA025HI	Male	chr4	70902352	C	T	E5 B-cell-like	5.50781	-	EH38E2302222	chr4	70902086	70902435	PLS,CTCF-bound
G01-GEA152HI	Male	chr17	76106129	A	G	TF3 FOXA1 / AR / ESR1	5.50619	-	EH38E1886645	chr17	76106040	76106375	dELS,CTCF-bound
G01-GEA053HI	Female	chr9	121202124	T	TG	CTCF CTCF-Cohesin	5.50405	-	EH38E2723623	chr9	121201826	121202176	PLS,CTCF-bound
G01-GEA132HI	Male	chr10	119686992	G	A	E4 Multi-tissue	5.50177	-	EH38E1504695	chr10	119686745	119687087	dELS,CTCF-bound
G01-GEA012HI	Female	chr3	9934400	T	G	CTCF CTCF-Cohesin	5.49927	+	EH38E2177470	chr3	9934212	9934413	pELS,CTCF-bound
G01-GEA050HI	Male	chr17	76529966	G	T	E5 B-cell-like	5.49883	+	EH38E1887130	chr17	76529700	76529969	dELS,CTCF-bound
G01-GEA288HI	Male	chr11	62395294	C	T	CTCF CTCF-Cohesin	5.49815	-	EH38E1542462	chr11	62395162	62395411	pELS,CTCF-bound
G01-GEA041HI	Female	chr6	138107628	C	G	CTCF CTCF-Cohesin	5.49652	+	EH38E2507737	chr6	138107323	138107672	PLS,CTCF-bound
3D633	Male	chr2	3536908	G	A	CTCF CTCF-Cohesin	5.49221	-	EH38E1968519	chr2	3536717	3537030	PLS,CTCF-bound
3D612	Male	chr10	24849883	G	T	E4 Multi-tissue	5.49112	+	EH38E1455924	chr10	24849596	24849946	dELS
3C572	Male	chr8	12754142	GC	G	CTCF CTCF-Cohesin	5.48813	+	EH38E2611421	chr8	12753924	12754266	pELS,CTCF-bound
G01-GEA335HI	Male	chr17	57875483	T	G	CTCF CTCF-Cohesin	5.4832	-	EH38E1873643	chr17	57875356	57875677	dELS,CTCF-bound
3E475	Male	chr10	5684508	A	C	E4 Multi-tissue	5.47457	-	EH38E1444635	chr10	5684494	5684841	PLS,CTCF-bound
3C559	Male	chr11	33692079	G	A	E4 Multi-tissue	5.47162	-	EH38E1531306	chr11	33692011	33692170	dELS,CTCF-bound
G01-GEA310HI	Male	chr3	184361678	G	A	CTCF CTCF-Cohesin	5.47113	-	EH38E2264372	chr3	184361585	184361931	PLS,CTCF-bound
G01-GEA150HI	Male	chr11	75559236	C	G	E4 Multi-tissue	5.46777	-	EH38E1553271	chr11	75559094	75559437	dELS
G01-GEA305HI	Male	chr1	6404837	G	C	CTCF CTCF-Cohesin	5.46249	-	EH38E1314409	chr1	6404731	6405020	dELS,CTCF-bound
3B479	Male	chr15	31328704	C	G	E4 Multi-tissue	5.46189	+	EH38E1750891	chr15	31328536	31328873	pELS,CTCF-bound
G01-GEA306HI	Male	chr4	2801278	G	C	CTCF CTCF-Cohesin	5.46176	+	EH38E2275870	chr4	2801193	2801537	dELS,CTCF-bound
G01-GEA306HI	Male	chr2	227466386	G	A	E12 Erythroblast-like	5.45384	-	EH38E2080656	chr2	227466251	227466599	dELS,CTCF-bound
G01-GEA154HI	Male	chr8	47627771	C	G	TF3 FOXA1 / AR / ESR1	5.45193	+	EH38E2628954	chr8	47627692	47628039	dELS,CTCF-bound
3B479	Male	chr13	41019320	G	T	L5 Low signal	5.45104	+	EH38E1670565	chr13	41019149	41019454	PLS,CTCF-bound
4B691	Female	chr17	19398525	C	T	E12 Erythroblast-like	5.45048	+	EH38E1851461	chr17	19398296	19398537	dELS
G01-GEA114HI	Male	chr4	2756188	C	G	CTCF CTCF-Cohesin	5.44878	-	EH38E2275811	chr4	2755975	2756190	pELS,CTCF-bound
5L790	Male	chr2	84946381	C	T	E11 T-cell	5.44416	-	EH38E2013327	chr2	84946270	84946620	dELS,CTCF-bound
G01-GEA182HI	Male	chr11	66727509	TGCTGGGTAGTTCCGTGCGGG	T	E12 Erythroblast-like	5.44156	-	EH38E1546432	chr11	66727409	66727755	pELS,CTCF-bound
G01-GEA103HI	Male	chr14	77213585	G	A	CTCF CTCF-Cohesin	5.4362	-	EH38E1730013	chr14	77213392	77213742	dELS,CTCF-bound
G01-GEA012HI	Female	chr17	57085092	C	A	CTCF CTCF-Cohesin	5.43556	-	EH38E1872831	chr17	57084965	57085315	PLS,CTCF-bound
3A671	Female	chr3	184284903	G	A	CTCF CTCF-Cohesin	5.43211	-	EH38E2264288	chr3	184284712	184285061	CTCF-only,CTCF-bound
3C545	Male	chr19	35041013	C	T	E12 Erythroblast-like	5.43204	+	EH38E1950588	chr19	35040969	35041318	pELS,CTCF-bound
G01-GEA278HI	Male	chr11	66269454	C	A	CTCF CTCF-Cohesin	5.43032	-	EH38E1546035	chr11	66269322	66269581	pELS,CTCF-bound
3E475	Male	chr16	87779250	A	AG	CTCF CTCF-Cohesin	5.42985	-	EH38E1836424	chr16	87779118	87779468	PLS,CTCF-bound
G01-GEA310HI	Male	chr2	11374876	A	G	E4 Multi-tissue	5.41925	-	EH38E1973457	chr2	11374598	11374948	dELS,CTCF-bound
G01-GEA177HI	Male	chr15	74196395	C	T	E4 Multi-tissue	5.41898	-	EH38E1777376	chr15	74196219	74196564	dELS
G01-GEA309HI	Male	chr1	8561220	A	G	CTCF CTCF-Cohesin	5.41729	-	EH38E1316242	chr1	8561126	8561291	dELS,CTCF-bound
3D630	Male	chr20	49775594	G	A	E12 Erythroblast-like	5.41569	+	EH38E2119037	chr20	49775296	49775645	dELS,CTCF-bound
G01-GEA214HI	Male	chr15	66294680	T	A	E4 Multi-tissue	5.41192	-	EH38E1771328	chr15	66294480	66294830	pELS
G01-GEA100HI	Male	chr12	121240651	C	G	CTCF CTCF-Cohesin	5.40981	+	EH38E1650561	chr12	121240548	121240897	dELS,CTCF-bound
G01-GEA182HI	Male	chr3	188297223	TGTGTA	T	E4 Multi-tissue	5.40195	-	EH38E2267356	chr3	188296998	188297343	dELS,CTCF-bound
G01-GEA074HI	Male	chr1	179954510	C	T	E5 B-cell-like	5.39989	-	EH38E1401726	chr1	179954457	179954807	PLS,CTCF-bound
G01-GEA003HI	Male	chr19	52943090	A	G	E4 Multi-tissue	5.39788	-	EH38E1963270	chr19	52942956	52943306	pELS,CTCF-bound
G01-GEA024HI	Female	chr3	194395445	C	T	E4 Multi-tissue	5.39603	-	EH38E2271020	chr3	194395210	194395560	dELS
G01-GEA337HI	Male	chr15	96172086	T	G	E6 Weak epithelial	5.39357	-	EH38E1790813	chr15	96171967	96172184	pELS,CTCF-bound
G01-GEA224HI	Female	chr16	85287243	G	A	CTCF CTCF-Cohesin	5.39217	+	EH38E1834111	chr16	85287006	85287355	dELS,CTCF-bound
G01-GEA239HI	Male	chr15	68155143	A	G	CTCF CTCF-Cohesin	5.38909	-	EH38E1772881	chr15	68154978	68155282	dELS,CTCF-bound
G01-GEA240HI	Female	chr19	58381146	GGGCTTCGGTTATC	G	E5 B-cell-like	5.38188	-	EH38E1966298	chr19	58381010	58381360	PLS,CTCF-bound
3C567	Male	chr9	7402203	T	C	CTCF CTCF-Cohesin	5.38093	-	EH38E2680846	chr9	7402092	7402323	dELS,CTCF-bound
G01-GEA191HI	Male	chr7	2621306	C	T	E4 Multi-tissue	5.37959	-	EH38E2529759	chr7	2621148	2621497	dELS,CTCF-bound
G01-GEA307HI	Female	chr14	53152410	T	A	CTCF CTCF-Cohesin	5.37956	+	EH38E1714640	chr14	53152283	53152616	pELS,CTCF-bound
3D629	Male	chr19	48320194	C	A	CTCF CTCF-Cohesin	5.37802	-	EH38E1959812	chr19	48320031	48320373	PLS,CTCF-bound
G01-GEA041HI	Female	chr14	73836838	T	C	CTCF CTCF-Cohesin	5.37796	-	EH38E1727471	chr14	73836658	73836907	dELS,CTCF-bound
G01-GEA288HI	Male	chr20	37987093	G	GACAAATTCCAAACC	E4 Multi-tissue	5.37559	+	EH38E2111170	chr20	37986972	37987322	dELS
5L790	Male	chr2	110657912	C	T	E4 Multi-tissue	5.37023	+	EH38E2024335	chr2	110657736	110658062	dELS
G01-GEA208HI	Male	chr11	6612941	T	C	CTCF CTCF-Cohesin	5.36974	+	EH38E1517567	chr11	6612808	6613052	pELS,CTCF-bound
G01-GEA003HI	Male	chr17	72126709	G	GCTGT	CTCF CTCF-Cohesin	5.36882	-	EH38E1883174	chr17	72126571	72126894	dELS,CTCF-bound
G01-GEA235HI	Male	chr9	137176742	G	A	CTCF CTCF-Cohesin	5.36431	-	EH38E2737657	chr9	137176596	137176832	dELS,CTCF-bound
G01-GEA248HI	Male	chr22	36332160	C	T	CTCF CTCF-Cohesin	5.36136	+	EH38E2161709	chr22	36332130	36332477	dELS,CTCF-bound
G01-GEA135HI	Male	chr15	53587003	G	T	CTCF CTCF-Cohesin	5.35977	+	EH38E1763075	chr15	53586792	53587141	CTCF-only,CTCF-bound
4C200	Female	chr9	91515409	G	A	E4 Multi-tissue	5.35963	-	EH38E2706947	chr9	91515331	91515565	dELS,CTCF-bound
4B691	Female	chr5	151002394	TG	T	CTCF CTCF-Cohesin	5.35946	+	EH38E2421439	chr5	151002332	151002490	CTCF-only,CTCF-bound
3A671	Female	chr8	141183660	C	A	CTCF CTCF-Cohesin	5.35712	-	EH38E2673608	chr8	141183509	141183815	dELS,CTCF-bound
G01-GEA180HI	Male	chr17	38429027	C	A	CTCF CTCF-Cohesin	5.35512	+	EH38E1859986	chr17	38429026	38429360	pELS,CTCF-bound
G01-GEA096HI	Male	chr8	42412501	T	G	CTCF CTCF-Cohesin	5.35456	-	EH38E2627924	chr8	42412381	42412698	dELS,CTCF-bound
G01-GEA150HI	Male	chr2	207529929	C	T	CTCF CTCF-Cohesin	5.35397	+	EH38E2069831	chr2	207529777	207530127	PLS,CTCF-bound
G01-GEA041HI	Female	chr20	35455151	C	T	E5 B-cell-like	5.34578	-	EH38E2109193	chr20	35454976	35455325	PLS,CTCF-bound
3C145	Female	chr5	139844576	T	C	CTCF CTCF-Cohesin	5.34567	-	EH38E2413848	chr5	139844433	139844768	CTCF-only,CTCF-bound
G01-GEA235HI	Male	chr22	38788619	CCAGA	C	E4 Multi-tissue	5.3443	-	EH38E2164079	chr22	38788411	38788761	dELS,CTCF-bound
G01-GEA264HI	Male	chr6	34889207	A	AGGGGGCG	E4 Multi-tissue	5.3341	-	EH38E2461895	chr6	34889062	34889411	PLS,CTCF-bound
3B334	Female	chr21	42389791	G	A	TF3 FOXA1 / AR / ESR1	5.32797	+	EH38E2144628	chr21	42389492	42389840	dELS,CTCF-bound
G01-GEA195HI	Male	chr19	18743492	G	T	E12 Erythroblast-like	5.32535	-	EH38E1944691	chr19	18743275	18743622	pELS,CTCF-bound
G01-GEA012HI	Female	chr21	37087289	TGGC	T	CTCF CTCF-Cohesin	5.32172	-	EH38E2140814	chr21	37087240	37087408	pELS,CTCF-bound
G01-GEA191HI	Male	chr3	178352819	A	G	E4 Multi-tissue	5.31999	-	EH38E2261251	chr3	178352705	178353043	dELS
G01-GEA023HI	Male	chr10	18659972	A	G	CTCF CTCF-Cohesin	5.31949	+	EH38E1452648	chr10	18659831	18660015	pELS,CTCF-bound
G01-GEA269HI	Male	chr5	178205470	C	T	P Promoter	5.31365	-	EH38E2436003	chr5	178205257	178205587	pELS,CTCF-bound
3C565	Male	chr19	56080743	G	A	CTCF CTCF-Cohesin	5.31025	-	EH38E1965238	chr19	56080659	56080979	dELS,CTCF-bound
3E473	Male	chr20	51742881	G	A	E5 B-cell-like	5.3065	+	EH38E2121113	chr20	51742819	51743024	dELS
5L790	Male	chr18	5296986	C	T	CTCF CTCF-Cohesin	5.29801	-	EH38E1896794	chr18	5296856	5297083	PLS,CTCF-bound
G01-GEA003HI	Male	chr1	36576369	C	CGTGG	CTCF CTCF-Cohesin	5.29757	-	EH38E1337608	chr1	36576106	36576433	dELS,CTCF-bound
3E468	Female	chr10	62804170	ACAGCTGGGCCCAGCTGGGCC	A	E4 Multi-tissue	5.29606	-	EH38E1472577	chr10	62804053	62804328	pELS,CTCF-bound
5F620	Male	chr2	45889335	A	C	CTCF CTCF-Cohesin	5.2812	-	EH38E1994357	chr2	45889029	45889372	dELS,CTCF-bound
G01-GEA177HI	Male	chr7	129224508	C	G	E4 Multi-tissue	5.28009	-	EH38E2589511	chr7	129224488	129224653	pELS,CTCF-bound
G01-GEA334HI	Male	chr12	642788	G	C	E4 Multi-tissue	5.27939	-	EH38E1585554	chr12	642659	643007	PLS,CTCF-bound
G01-GEA173HI	Male	chr17	75827719	C	T	CTCF CTCF-Cohesin	5.2697	+	EH38E1886329	chr17	75827582	75827902	dELS,CTCF-bound
G01-GEA279HI	Female	chr15	72232353	C	T	E12 Erythroblast-like	5.26849	-	EH38E1776237	chr15	72232142	72232492	pELS
G01-GEA193HI	Male	chr19	44095402	T	G	CTCF CTCF-Cohesin	5.2682	+	EH38E1956538	chr19	44095182	44095507	pELS,CTCF-bound
4B713	Male	chr1	27112326	T	A	CTCF CTCF-Cohesin	5.26698	-	EH38E1331108	chr1	27112128	27112476	dELS,CTCF-bound
G01-GEA030HI	Male	chr15	73601922	C	T	E4 Multi-tissue	5.26689	-	EH38E1776903	chr15	73601828	73602173	dELS
G01-GEA090HI	Male	chr3	189941768	A	C	TF3 FOXA1 / AR / ESR1	5.25749	+	EH38E2268490	chr3	189941698	189942028	dELS
G01-GEA239HI	Male	chr17	2053985	A	T	E4 Multi-tissue	5.25431	-	EH38E1840560	chr17	2053807	2054153	pELS,CTCF-bound
G01-GEA262HI	Female	chr2	191020478	TACGCAGGCGCAGC	T	P Promoter	5.25241	-	EH38E2061248	chr2	191020228	191020576	pELS,CTCF-bound
3C560	Male	chr1	150579541	C	T	CTCF CTCF-Cohesin	5.24817	+	EH38E1383712	chr1	150579494	150579842	PLS,CTCF-bound
G01-GEA045HI	Male	chr6	116462067	C	G	CTCF CTCF-Cohesin	5.24446	-	EH38E2496741	chr6	116461974	116462324	pELS,CTCF-bound
3E466	Male	chr12	108729955	C	T	E6 Weak epithelial	5.2392	-	EH38E1642490	chr12	108729757	108730094	pELS,CTCF-bound
2H163	Male	chr7	29370647	C	T	E12 Erythroblast-like	5.23752	-	EH38E2544467	chr7	29370537	29370884	dELS
G01-GEA136HI	Male	chr1	14259415	C	T	TF5 AR	5.23529	-	EH38E1320531	chr1	14259206	14259553	dELS,CTCF-bound
3D633	Male	chr17	57899045	G	A	E4 Multi-tissue	5.23502	-	EH38E1873678	chr17	57898956	57899304	dELS
3D615	Male	chr17	7315584	G	T	CTCF CTCF-Cohesin	5.22326	+	EH38E1844257	chr17	7315240	7315590	PLS,CTCF-bound
G01-GEA285HI	Male	chr11	120710523	C	A	E4 Multi-tissue	5.22181	-	EH38E1576069	chr11	120710397	120710743	dELS,CTCF-bound
G01-GEA182HI	Male	chr19	11095190	AC	A	E12 Erythroblast-like	5.21845	-	EH38E1938940	chr19	11095058	11095408	dELS,CTCF-bound
G01-GEA190HI	Male	chr2	96532256	C	T	CTCF CTCF-Cohesin	5.21821	-	EH38E2016707	chr2	96532077	96532422	PLS,CTCF-bound
G01-GEA281HI	Male	chr19	2544142	C	T	TF5 AR	5.20831	-	EH38E1932504	chr19	2543990	2544251	dELS,CTCF-bound
3B331	Male	chr9	137086765	C	CGG	E5 B-cell-like	5.19902	-	EH38E2737555	chr9	137086694	137087044	PLS,CTCF-bound
3C565	Male	chr1	54052465	C	T	E4 Multi-tissue	5.18525	-	EH38E1348647	chr1	54052422	54052690	pELS
3A551	Female	chr17	76121487	G	C	CTCF CTCF-Cohesin	5.1824	-	EH38E1886653	chr17	76121436	76121757	dELS,CTCF-bound
G01-GEA252HI	Male	chr17	81057171	G	A	CTCF CTCF-Cohesin	5.17546	-	EH38E1891765	chr17	81057152	81057486	dELS,CTCF-bound
G01-GEA090HI	Male	chr15	77067603	T	C	TF3 FOXA1 / AR / ESR1	5.17509	-	EH38E1779485	chr15	77067404	77067751	pELS
G01-GEA336HI	Male	chr9	72364608	T	C	E4 Multi-tissue	5.17176	-	EH38E2696745	chr9	72364449	72364761	PLS,CTCF-bound
G01-GEA186HI	Female	chr17	38677200	AGCT	A	CTCF CTCF-Cohesin	5.17061	-	EH38E1860227	chr17	38677017	38677367	pELS,CTCF-bound
3C572	Male	chr19	9586884	G	T	CTCF CTCF-Cohesin	5.16961	-	EH38E1937693	chr19	9586720	9587066	DNase-H3K4me3,CTCF-bound
G01-GEA180HI	Male	chr3	129016540	G	T	CTCF CTCF-Cohesin	5.1681	+	EH38E2236980	chr3	129016336	129016686	dELS,CTCF-bound
2K890	Male	chr2	17646183	G	C	TF3 FOXA1 / AR / ESR1	5.16611	+	EH38E1976936	chr2	17646039	17646379	dELS,CTCF-bound
G01-GEA269HI	Male	chr14	23155420	C	T	CTCF CTCF-Cohesin	5.16123	-	EH38E1702895	chr14	23155207	23155548	PLS,CTCF-bound
XH678	Male	chr8	41828249	TCCCGCTCCGC	T	P Promoter	5.15804	-	EH38E2627504	chr8	41828232	41828386	pELS,CTCF-bound
3B335	Male	chr8	2086865	G	T	CTCF CTCF-Cohesin	5.15065	-	EH38E2606859	chr8	2086728	2087023	dELS,CTCF-bound
5G257	Male	chr14	50000660	C	T	CTCF CTCF-Cohesin	5.15024	-	EH38E1712535	chr14	50000462	50000812	dELS,CTCF-bound
G01-GEA158HI	Male	chr7	2763348	A	AGTTTGTTTGCTTCATC	TF3 FOXA1 / AR / ESR1	5.14951	+	EH38E2529941	chr7	2763094	2763417	PLS
G01-GEA266HI	Male	chr1	64474694	A	AAAC	TF3 FOXA1 / AR / ESR1	5.14647	+	EH38E1355119	chr1	64474680	64475028	dELS,CTCF-bound
G01-GEA143HI	Female	chr16	29961765	G	T	P Promoter	5.14604	+	EH38E1811072	chr16	29961614	29961825	pELS,CTCF-bound
G01-GEA260HI	Male	chr1	37692407	CG	C	CTCF CTCF-Cohesin	5.14429	+	EH38E1338217	chr1	37692188	37692537	PLS,CTCF-bound
3C147	Male	chr12	56127980	GCCT	G	CTCF CTCF-Cohesin	5.1403	+	EH38E1615502	chr12	56127902	56128252	PLS,CTCF-bound
1D466	Female	chr12	48002860	C	G	E4 Multi-tissue	5.13952	-	EH38E1609181	chr12	48002803	48002970	pELS,CTCF-bound
G01-GEA100HI	Male	chr3	185977607	G	A	CTCF CTCF-Cohesin	5.13907	-	EH38E2265530	chr3	185977448	185977766	CTCF-only,CTCF-bound
G01-GEA150HI	Male	chr6	152302146	G	A	CTCF CTCF-Cohesin	5.13491	-	EH38E2516160	chr6	152302113	152302462	dELS,CTCF-bound
3B479	Male	chr11	65479444	G	A	E4 Multi-tissue	5.13213	-	EH38E1545178	chr11	65479320	65479667	dELS,CTCF-bound
G01-GEA149HI	Male	chr18	58263292	G	T	TF3 FOXA1 / AR / ESR1	5.12909	-	EH38E1920073	chr18	58263106	58263456	dELS
G01-GEA154HI	Male	chr6	4135213	G	C	P Promoter	5.12844	+	EH38E2441369	chr6	4135191	4135520	PLS,CTCF-bound
G01-GEA251HI	Male	chr1	99264428	G	A	CTCF CTCF-Cohesin	5.12464	-	EH38E1371088	chr1	99264246	99264578	PLS,CTCF-bound
G01-GEA269HI	Male	chr2	241883067	T	C	E4 Multi-tissue	5.11209	-	EH38E2091084	chr2	241882967	241883317	pELS
3C554	Male	chr19	18520260	C	G	CTCF CTCF-Cohesin	5.1099	-	EH38E1944487	chr19	18519982	18520329	pELS,CTCF-bound
2K890	Male	chr2	55617933	ATGT	A	CTCF CTCF-Cohesin	5.10709	-	EH38E1999535	chr2	55617607	55617957	PLS,CTCF-bound
G01-GEA169HI	Male	chr2	86221206	TA	T	CTCF CTCF-Cohesin	5.10509	-	EH38E2014512	chr2	86221084	86221434	dELS,CTCF-bound
G01-GEA012HI	Female	chr4	184648870	T	C	CTCF CTCF-Cohesin	5.10256	+	EH38E2349095	chr4	184648716	184649057	pELS,CTCF-bound
G01-GEA267HI	Male	chr4	84965956	G	A	CTCF CTCF-Cohesin	5.10112	+	EH38E2309271	chr4	84965921	84966244	pELS,CTCF-bound
G01-GEA204HI	Male	chr1	155086103	TCCCCACCCGCA	T	CTCF CTCF-Cohesin	5.10083	+	EH38E1386835	chr1	155086053	155086381	dELS,CTCF-bound
G01-GEA124HI	Male	chr2	176001792	C	CCCA	E4 Multi-tissue	5.10027	+	EH38E2053947	chr2	176001779	176001956	pELS,CTCF-bound
G01-GEA103HI	Male	chr10	13660046	T	C	E4 Multi-tissue	5.09959	+	EH38E1449584	chr10	13659870	13660219	dELS,CTCF-bound
G01-GEA096HI	Male	chr6	7137706	G	C	E4 Multi-tissue	5.09613	-	EH38E2443467	chr6	7137614	7137964	dELS,CTCF-bound
G01-GEA003HI	Male	chr1	185318091	C	G	CTCF CTCF-Cohesin	5.09286	+	EH38E1405342	chr1	185317830	185318180	pELS,CTCF-bound
G01-GEA220HI	Male	chr5	177600417	C	A	CTCF CTCF-Cohesin	5.09224	-	EH38E2435829	chr5	177600323	177600490	pELS,CTCF-bound
G01-GEA184HI	Female	chr12	121352389	TCAC	T	CTCF CTCF-Cohesin	5.0834	-	EH38E1650650	chr12	121352330	121352680	PLS,CTCF-bound
G01-GEA150HI	Male	chr2	10369540	G	A	TF3 FOXA1 / AR / ESR1	5.08256	+	EH38E1972697	chr2	10369265	10369602	pELS,CTCF-bound
3C562	Male	chr12	56221764	CT	C	CTCF CTCF-Cohesin	5.08108	+	EH38E1615593	chr12	56221755	56222100	PLS,CTCF-bound
G01-GEA124HI	Male	chrX	49184408	T	C	CTCF CTCF-Cohesin	5.07719	+	EH38E2754397	chrX	49184353	49184701	pELS,CTCF-bound
G01-GEA023HI	Male	chr3	15512385	A	G	E12 Erythroblast-like	5.07276	-	EH38E2181650	chr3	15512229	15512566	dELS,CTCF-bound
3B571	Female	chr16	1090054	C	G	CTCF CTCF-Cohesin	5.07199	+	EH38E1795375	chr16	1089844	1090170	dELS,CTCF-bound
G01-GEA252HI	Male	chr1	149937594	A	G	E6 Weak epithelial	5.0671	-	EH38E1383242	chr1	149937370	149937714	pELS,CTCF-bound
G01-GEA114HI	Male	chr17	80866398	C	A	CTCF CTCF-Cohesin	5.06697	-	EH38E1891528	chr17	80866217	80866535	dELS,CTCF-bound
3B479	Male	chr2	46812624	G	A	E4 Multi-tissue	5.06604	+	EH38E1995266	chr2	46812540	46812885	dELS,CTCF-bound
3B374	Male	chr16	19754577	A	C	E6 Weak epithelial	5.06322	-	EH38E1806123	chr16	19754282	19754619	dELS
G01-GEA335HI	Male	chr11	36376486	C	T	E4 Multi-tissue	5.05831	+	EH38E1533592	chr11	36376326	36376663	pELS,CTCF-bound
3D616	Female	chr6	44223920	G	A	CTCF CTCF-Cohesin	5.05192	-	EH38E2469337	chr6	44223751	44224045	PLS,CTCF-bound
G01-GEA149HI	Male	chr10	122113119	C	G	CTCF CTCF-Cohesin	5.04704	+	EH38E1506117	chr10	122113067	122113337	PLS,CTCF-bound
G01-GEA281HI	Male	chr17	72126723	A	C	CTCF CTCF-Cohesin	5.04122	+	EH38E1883174	chr17	72126571	72126894	dELS,CTCF-bound
G01-GEA191HI	Male	chr12	109949150	G	A	E4 Multi-tissue	5.03787	-	EH38E1643437	chr12	109949018	109949363	pELS
G01-GEA335HI	Male	chr8	61690142	G	A	TF3 FOXA1 / AR / ESR1	5.03502	-	EH38E2635283	chr8	61690054	61690229	pELS,CTCF-bound
3B479	Male	chr3	141192419	C	T	CTCF CTCF-Cohesin	5.03462	-	EH38E2243320	chr3	141192274	141192624	dELS,CTCF-bound
3A551	Female	chr14	75234565	C	A	E11 T-cell	5.03287	+	EH38E1728491	chr14	75234509	75234859	dELS,CTCF-bound
G01-GEA305HI	Male	chr17	77528822	A	G	CTCF CTCF-Cohesin	5.02907	-	EH38E1888248	chr17	77528627	77528962	pELS,CTCF-bound
3B479	Male	chr2	44952388	G	C	CTCF CTCF-Cohesin	5.02906	-	EH38E1993637	chr2	44952283	44952575	dELS,CTCF-bound
G01-GEA258HI	Female	chr5	143356000	CAT	C	TF5 AR	5.02576	+	EH38E2416625	chr5	143355750	143356100	dELS
G01-GEA012HI	Female	chr1	11650437	G	A	CTCF CTCF-Cohesin	5.02502	-	EH38E1318970	chr1	11650367	11650717	dELS,CTCF-bound
G01-GEA161HI	Male	chr5	61675236	TTGTC	T	CTCF CTCF-Cohesin	5.02438	-	EH38E2376610	chr5	61675084	61675432	dELS,CTCF-bound
G01-GEA249HI	Male	chr15	38683815	G	T	CTCF CTCF-Cohesin	5.01441	-	EH38E1754431	chr15	38683690	38683891	dELS,CTCF-bound
G01-GEA193HI	Male	chr4	80266549	T	A	CTCF CTCF-Cohesin	5.01124	-	EH38E2307038	chr4	80266387	80266728	PLS,CTCF-bound
G01-GEA026HI	Male	chrX	12974622	G	T	E4 Multi-tissue	5.01084	-	EH38E2742868	chrX	12974536	12974878	pELS,CTCF-bound
3C546	Male	chr20	62819190	C	A	E4 Multi-tissue	5.01003	-	EH38E2128587	chr20	62819176	62819525	dELS
G01-GEA065HI	Male	chr5	163460084	C	G	CTCF CTCF-Cohesin	5.00532	+	EH38E2427533	chr5	163460032	163460283	PLS,CTCF-bound
G01-GEA140HI	Male	chr12	71947770	G	A	E4 Multi-tissue	5.00529	-	EH38E1624282	chr12	71947749	71948095	dELS,CTCF-bound
3C562	Male	chr4	120067458	A	G	CTCF CTCF-Cohesin	5.00425	-	EH38E2323487	chr4	120067357	120067507	PLS,CTCF-bound
G01-GEA105HI	Male	chr3	11774489	G	A	CTCF CTCF-Cohesin	4.99983	+	EH38E2178780	chr3	11774341	11774619	dELS,CTCF-bound
G01-GEA001HI	Male	chr6	53065405	T	C	CTCF CTCF-Cohesin	4.99827	-	EH38E2473529	chr6	53065299	53065451	PLS,CTCF-bound
G01-GEA024HI	Female	chr4	4248176	C	G	CTCF CTCF-Cohesin	4.99604	+	EH38E2276897	chr4	4248089	4248438	PLS,CTCF-bound
G01-GEA025HI	Male	chr10	89645969	T	TCAAATTCCA	E4 Multi-tissue	4.99517	+	EH38E1487347	chr10	89645807	89646095	pELS
G01-GEA239HI	Male	chr18	49814377	G	A	E4 Multi-tissue	4.99124	+	EH38E1916111	chr18	49814301	49814455	PLS,CTCF-bound
4B699	Male	chr17	39668696	G	A	CTCF CTCF-Cohesin	4.99115	+	EH38E1861027	chr17	39668449	39668699	PLS,CTCF-bound
G01-GEA251HI	Male	chr5	96434387	T	C	CTCF CTCF-Cohesin	4.98969	-	EH38E2393136	chr5	96434243	96434563	pELS,CTCF-bound
3C139	Male	chr3	73623926	C	CT	CTCF CTCF-Cohesin	4.98827	+	EH38E2215108	chr3	73623829	73624056	pELS,CTCF-bound
5L790	Male	chr1	154326448	G	A	CTCF CTCF-Cohesin	4.98579	-	EH38E1386036	chr1	154326245	154326582	pELS,CTCF-bound
G01-GEA065HI	Male	chr14	77377154	G	A	CTCF CTCF-Cohesin	4.98341	-	EH38E1730132	chr14	77376910	77377260	PLS,CTCF-bound
G01-GEA289HI	Female	chr18	59837707	G	A	CTCF CTCF-Cohesin	4.9813	-	EH38E1921442	chr18	59837539	59837858	CTCF-only,CTCF-bound
G01-GEA176HI	Male	chr14	103333543	C	T	CTCF CTCF-Cohesin	4.97967	+	EH38E1744861	chr14	103333428	103333612	pELS,CTCF-bound
G01-GEA248HI	Male	chr15	99124108	CAG	C	E1 Stem cell	4.9769	-	EH38E1792336	chr15	99123804	99124154	dELS,CTCF-bound
3A551	Female	chr3	72337162	A	T	E4 Multi-tissue	4.97664	-	EH38E2214173	chr3	72337054	72337381	dELS,CTCF-bound
5L790	Male	chr4	143559038	C	T	CTCF CTCF-Cohesin	4.97612	-	EH38E2332240	chr4	143558760	143559094	pELS,CTCF-bound
G01-GEA262HI	Female	chr17	18981844	C	T	TF5 AR	4.96818	+	EH38E1851216	chr17	18981680	18981952	dELS,CTCF-bound
3B571	Female	chr16	13910023	ATCAGCTTGTG	A	CTCF CTCF-Cohesin	4.9673	-	EH38E1803445	chr16	13909924	13910273	dELS,CTCF-bound
G01-GEA289HI	Female	chr16	11089804	G	A	E4 Multi-tissue	4.96509	+	EH38E1801479	chr16	11089768	11090116	dELS,CTCF-bound
3A550	Male	chr17	7484977	C	G	CTCF CTCF-Cohesin	4.96357	-	EH38E1844433	chr17	7484642	7484990	PLS,CTCF-bound
3C560	Male	chr7	30479514	TAAATC	T	CTCF CTCF-Cohesin	4.96232	-	EH38E2545330	chr7	30479462	30479684	pELS
G01-GEA337HI	Male	chr16	3960703	C	T	E4 Multi-tissue	4.95833	-	EH38E1797923	chr16	3960612	3960825	dELS,CTCF-bound
G01-GEA147HI	Male	chr16	11297882	A	T	CTCF CTCF-Cohesin	4.95465	-	EH38E1801738	chr16	11297575	11297925	dELS,CTCF-bound
3D616	Female	chr6	141483804	A	G	E4 Multi-tissue	4.9526	-	EH38E2509820	chr6	141483651	141484001	dELS
G01-GEA249HI	Male	chr7	30028422	G	C	CTCF CTCF-Cohesin	4.95087	-	EH38E2544924	chr7	30028167	30028516	PLS,CTCF-bound
G01-GEA327HI	Male	chr16	88812503	T	C	CTCF CTCF-Cohesin	4.94338	-	EH38E1837489	chr16	88812217	88812566	pELS,CTCF-bound
XA214	Female	chr11	57639406	T	TA	E5 B-cell-like	4.94251	-	EH38E1539674	chr11	57639350	57639700	pELS,CTCF-bound
G01-GEA135HI	Male	chr12	50622119	G	A	E4 Multi-tissue	4.94242	-	EH38E1611119	chr12	50621846	50622181	dELS,CTCF-bound
1D466	Female	chr16	1309105	GC	G	E5 B-cell-like	4.94167	-	EH38E1795564	chr16	1308947	1309297	PLS,CTCF-bound
3C559	Male	chr14	75234723	C	G	E4 Multi-tissue	4.94113	+	EH38E1728491	chr14	75234509	75234859	dELS,CTCF-bound
G01-GEA336HI	Male	chr15	31366016	C	T	CTCF CTCF-Cohesin	4.94035	-	EH38E1750963	chr15	31365772	31366120	dELS,CTCF-bound
G01-GEA096HI	Male	chr1	201469268	CG	C	CTCF CTCF-Cohesin	4.9386	-	EH38E1411714	chr1	201469204	201469478	PLS,CTCF-bound
2F730	Male	chr19	7868985	G	A	CTCF CTCF-Cohesin	4.93717	-	EH38E1936824	chr19	7868679	7869018	pELS,CTCF-bound
3B374	Male	chr19	1408924	G	T	E12 Erythroblast-like	4.93679	+	EH38E1931242	chr19	1408669	1409013	pELS,CTCF-bound
4B696	Male	chr18	37394033	C	T	CTCF CTCF-Cohesin	4.93277	-	EH38E1910427	chr18	37393895	37394152	dELS,CTCF-bound
G01-GEA065HI	Male	chr16	81266798	C	T	E4 Multi-tissue	4.93025	+	EH38E1831200	chr16	81266746	81267089	dELS,CTCF-bound
G01-GEA180HI	Male	chr9	105415530	T	TGGGGTGGTCGTCCTTGAG	E4 Multi-tissue	4.92657	-	EH38E2714417	chr9	105415405	105415744	DNase-H3K4me3,CTCF-bound
G01-GEA288HI	Male	chr22	45309804	C	CGGCGGGGCGGGGCGG	CTCF CTCF-Cohesin	4.92248	-	EH38E2169428	chr22	45309657	45310007	PLS,CTCF-bound
G01-GEA159HI	Female	chr5	17190233	C	T	E4 Multi-tissue	4.92158	+	EH38E2360149	chr5	17190194	17190543	dELS,CTCF-bound
G01-GEA204HI	Male	chr2	47345055	T	C	CTCF CTCF-Cohesin	4.92073	-	EH38E1995845	chr2	47345014	47345337	PLS,CTCF-bound
G01-GEA110HI	Female	chr3	196712581	G	T	CTCF CTCF-Cohesin	4.91939	+	EH38E2272876	chr3	196712492	196712671	PLS,CTCF-bound
3D317	Female	chr5	78510635	G	GAA	CTCF CTCF-Cohesin	4.9153	-	EH38E2384872	chr5	78510354	78510701	dELS,CTCF-bound
3D612	Male	chr12	59067286	G	A	E4 Multi-tissue	4.90561	-	EH38E1617633	chr12	59067087	59067433	dELS
G01-GEA182HI	Male	chr6	84033838	G	GGAGCCGGAACCAGGGCC	P Promoter	4.90404	+	EH38E2482745	chr6	84033589	84033930	PLS,CTCF-bound
G01-GEA310HI	Male	chr14	64682316	G	T	E4 Multi-tissue	4.89838	-	EH38E1721293	chr14	64682106	64682456	dELS,CTCF-bound
G01-GEA118HI	Female	chr19	11092024	C	T	E4 Multi-tissue	4.88836	-	EH38E1938934	chr19	11091684	11092033	dELS,CTCF-bound
G01-GEA100HI	Male	chr14	50040608	GC	G	E5 B-cell-like	4.88513	-	EH38E1712596	chr14	50040457	50040806	pELS,CTCF-bound
G01-GEA103HI	Male	chr1	171251422	G	T	CTCF CTCF-Cohesin	4.88265	+	EH38E1397006	chr1	171251351	171251679	pELS,CTCF-bound
2F867	Male	chr8	60792958	A	G	E4 Multi-tissue	4.8799	+	EH38E2634725	chr8	60792829	60793179	dELS,CTCF-bound
G01-GEA266HI	Male	chr9	128456943	C	T	CTCF CTCF-Cohesin	4.87934	+	EH38E2729618	chr9	128456751	128457096	PLS,CTCF-bound
G01-GEA267HI	Male	chr7	107891418	C	T	E4 Multi-tissue	4.87648	-	EH38E2580333	chr7	107891329	107891503	pELS,CTCF-bound
4B843	Male	chr11	65638612	G	T	CTCF CTCF-Cohesin	4.87543	+	EH38E1545420	chr11	65638446	65638726	pELS,CTCF-bound
3B479	Male	chr3	20040836	AC	A	CTCF CTCF-Cohesin	4.87275	+	EH38E2184135	chr3	20040685	20041033	pELS,CTCF-bound
G01-GEA284HI	Male	chr10	122879744	CG	C	CTCF CTCF-Cohesin	4.86857	+	EH38E1506662	chr10	122879503	122879839	PLS,CTCF-bound
G01-GEA003HI	Male	chr19	46471316	G	A	E4 Multi-tissue	4.86734	-	EH38E1958343	chr19	46471235	46471388	PLS,CTCF-bound
G01-GEA289HI	Female	chr16	85750385	CAGG	C	E5 B-cell-like	4.8646	+	EH38E1834750	chr16	85750202	85750547	pELS,CTCF-bound
G01-GEA284HI	Male	chr17	27893269	T	TGCCCCCGC	CTCF CTCF-Cohesin	4.86237	-	EH38E1853539	chr17	27893200	27893543	PLS,CTCF-bound
3B334	Female	chr11	85788011	A	C	E4 Multi-tissue	4.8588	-	EH38E1558226	chr11	85787827	85788170	dELS
G01-GEA163HI	Male	chr11	124195376	TAG	T	TF5 AR	4.85803	+	EH38E1578520	chr11	124195177	124195438	dELS,CTCF-bound
G01-GEA148HI	Female	chr19	37551795	G	GTGT	CTCF CTCF-Cohesin	4.85789	-	EH38E1951888	chr19	37551740	37551917	pELS,CTCF-bound
G01-GEA306HI	Male	chr1	203287312	G	A	E12 Erythroblast-like	4.85608	+	EH38E1413396	chr1	203287180	203287354	PLS,CTCF-bound
G01-GEA190HI	Male	chr8	37748058	A	G	CTCF CTCF-Cohesin	4.85432	+	EH38E2624870	chr8	37747914	37748243	PLS,CTCF-bound
G01-GEA209HI	Male	chr3	65412902	CCAAACCCTATAAG	C	CTCF CTCF-Cohesin	4.85386	+	EH38E2210169	chr3	65412591	65412939	dELS,CTCF-bound
G01-GEA278HI	Male	chr22	36157214	C	G	E12 Erythroblast-like	4.84956	-	EH38E2161520	chr22	36157091	36157438	dELS,CTCF-bound
G01-GEA226HI	Female	chr8	71844023	G	T	CTCF CTCF-Cohesin	4.84875	+	EH38E2639656	chr8	71843794	71844142	PLS,CTCF-bound
G01-GEA296HI	Male	chr8	144337746	C	T	CTCF CTCF-Cohesin	4.84448	+	EH38E2676185	chr8	144337591	144337918	pELS,CTCF-bound
4B710	Male	chr12	31324434	T	TCGCC	CTCF CTCF-Cohesin	4.84301	-	EH38E1603045	chr12	31324415	31324606	PLS,CTCF-bound
G01-GEA190HI	Male	chr3	183697643	G	C	CTCF CTCF-Cohesin	4.84257	+	EH38E2263903	chr3	183697518	183697695	pELS,CTCF-bound
3D632	Male	chr1	26111002	G	T	CTCF CTCF-Cohesin	4.83906	-	EH38E1330228	chr1	26110964	26111277	PLS,CTCF-bound
3D632	Male	chr18	11947374	T	C	CTCF CTCF-Cohesin	4.83199	+	EH38E1900827	chr18	11947324	11947674	dELS,CTCF-bound
G01-GEA009HI	Male	chr1	156003538	C	G	E4 Multi-tissue	4.83189	-	EH38E1387530	chr1	156003405	156003755	dELS,CTCF-bound
G01-GEA163HI	Male	chr10	89415395	C	CA	CTCF CTCF-Cohesin	4.82268	-	EH38E1487162	chr10	89415303	89415634	pELS,CTCF-bound
3D633	Male	chr10	101066693	C	T	CTCF CTCF-Cohesin	4.81955	-	EH38E1494005	chr10	101066522	101066763	dELS,CTCF-bound
G01-GEA335HI	Male	chr2	156467197	G	A	E4 Multi-tissue	4.81771	-	EH38E2043270	chr2	156467099	156467447	dELS
3D630	Male	chr17	15433373	A	G	E4 Multi-tissue	4.81554	-	EH38E1848841	chr17	15433137	15433487	dELS
1D466	Female	chr22	42269794	G	A	CTCF CTCF-Cohesin	4.81484	+	EH38E2167001	chr22	42269622	42269916	PLS,CTCF-bound
3D628	Male	chr12	109116015	A	T	TF5 AR	4.81379	-	EH38E1642781	chr12	109115785	109116134	pELS,CTCF-bound
G01-GEA310HI	Male	chr1	185316259	C	G	P Promoter	4.81049	+	EH38E1405338	chr1	185316130	185316480	pELS,CTCF-bound
4B858	Male	chr17	57256069	C	A	CTCF CTCF-Cohesin	4.80746	+	EH38E1872950	chr17	57256047	57256214	pELS,CTCF-bound
G01-GEA003HI	Male	chr12	124500746	G	C	E4 Multi-tissue	4.80596	+	EH38E1653342	chr12	124500617	124500966	dELS,CTCF-bound
G01-GEA267HI	Male	chr11	111936790	A	T	E4 Multi-tissue	4.8051	-	EH38E1569717	chr11	111936693	111936928	pELS,CTCF-bound
G01-GEA301HI	Male	chr20	46558784	C	T	E4 Multi-tissue	4.8026	+	EH38E2116291	chr20	46558446	46558792	dELS
G01-GEA105HI	Male	chr8	143933987	C	CCG	CTCF CTCF-Cohesin	4.80093	-	EH38E2675715	chr8	143933937	143934287	dELS,CTCF-bound
G01-GEA264HI	Male	chr8	37737614	C	G	TF5 AR	4.79657	+	EH38E2624865	chr8	37737527	37737877	PLS,CTCF-bound
3C560	Male	chr3	50601280	C	A	E12 Erythroblast-like	4.79633	-	EH38E2201366	chr3	50601119	50601468	PLS,CTCF-bound
G01-GEA190HI	Male	chr2	26012616	CTT	C	TF3 FOXA1 / AR / ESR1	4.79515	-	EH38E1981669	chr2	26012547	26012748	dELS
3C562	Male	chr3	48088268	C	G	CTCF CTCF-Cohesin	4.79377	-	EH38E2199315	chr3	48088031	48088338	pELS,CTCF-bound
G01-GEA110HI	Female	chr10	3755200	G	A	E12 Erythroblast-like	4.78809	-	EH38E1443098	chr10	3754963	3755311	dELS
3D628	Male	chr4	337056	TGAGA	T	CTCF CTCF-Cohesin	4.78442	+	EH38E2273923	chr4	337038	337349	pELS,CTCF-bound
3B336	Male	chr5	177300378	T	C	CTCF CTCF-Cohesin	4.77905	-	EH38E2435465	chr5	177300251	177300600	dELS,CTCF-bound
3B374	Male	chr7	99693499	GC	G	CTCF CTCF-Cohesin	4.77717	-	EH38E2575063	chr7	99693466	99693811	dELS,CTCF-bound
G01-GEA139HI	Male	chr14	54773326	G	C	E5 B-cell-like	4.77607	-	EH38E1715653	chr14	54773251	54773601	dELS,CTCF-bound
G01-GEA135HI	Male	chr8	116887717	AAGAGAAACCTTTACGTAGTCCAGCTCCTGT	A	CTCF CTCF-Cohesin	4.77545	-	EH38E2658963	chr8	116887513	116887859	dELS,CTCF-bound
G01-GEA103HI	Male	chr5	93620714	C	T	CTCF CTCF-Cohesin	4.77221	-	EH38E2391618	chr5	93620509	93620856	PLS,CTCF-bound
5F620	Male	chr9	114805880	GGAGCAACACCAGGCAGCAGGT	G	CTCF CTCF-Cohesin	4.77137	+	EH38E2720540	chr9	114805768	114805996	pELS,CTCF-bound
G01-GEA176HI	Male	chr9	101449237	G	A	CTCF CTCF-Cohesin	4.76701	-	EH38E2713277	chr9	101449075	101449425	pELS,CTCF-bound
3C546	Male	chr9	129642222	C	T	CTCF CTCF-Cohesin	4.76698	-	EH38E2730726	chr9	129642148	129642495	PLS,CTCF-bound
3C562	Male	chr16	87854021	T	TA	E4 Multi-tissue	4.76609	-	EH38E1836527	chr16	87853723	87854071	dELS,CTCF-bound
G01-GEA032HI	Female	chr1	91501753	A	G	CTCF CTCF-Cohesin	4.76443	-	EH38E1366917	chr1	91501617	91501779	pELS,CTCF-bound
3A550	Male	chr5	55226672	G	GCGGGGAGA	CTCF CTCF-Cohesin	4.75632	-	EH38E2372570	chr5	55226521	55226783	pELS,CTCF-bound
3C145	Female	chr10	103667553	G	A	E7 Monocyte / Macrophage	4.75566	+	EH38E1496081	chr10	103667361	103667677	dELS
3D615	Male	chr19	53077090	A	G	CTCF CTCF-Cohesin	4.75415	-	EH38E1963354	chr19	53076963	53077307	pELS,CTCF-bound
G01-GEA167HI	Male	chr16	51994830	C	T	E4 Multi-tissue	4.75254	-	EH38E1815642	chr16	51994650	51994998	dELS
G01-GEA229HI	Male	chr1	108560032	C	G	CTCF CTCF-Cohesin	4.75036	-	EH38E1374151	chr1	108559786	108560135	PLS,CTCF-bound
G01-GEA120HI	Male	chr17	37147599	A	G	E5 B-cell-like	4.75011	-	EH38E1859376	chr17	37147397	37147743	dELS
3A551	Female	chr2	219029863	G	A	CTCF CTCF-Cohesin	4.74706	-	EH38E2075817	chr2	219029701	219030046	dELS,CTCF-bound
G01-GEA284HI	Male	chr2	183038417	T	TGGCGGCGGC	CTCF CTCF-Cohesin	4.74451	-	EH38E2057938	chr2	183038344	183038694	PLS,CTCF-bound
G01-GEA310HI	Male	chr14	59965447	A	G	E5 B-cell-like	4.7388	-	EH38E1718575	chr14	59965120	59965468	dELS,CTCF-bound
3E468	Female	chr1	5514733	G	A	CTCF CTCF-Cohesin	4.73825	-	EH38E1313760	chr1	5514573	5514911	dELS,CTCF-bound
G01-GEA015HI	Male	chr9	129006921	A	G	CTCF CTCF-Cohesin	4.73691	-	EH38E2730017	chr9	129006755	129007098	pELS,CTCF-bound
G01-GEA266HI	Male	chr9	129069637	A	G	E4 Multi-tissue	4.73119	+	EH38E2730082	chr9	129069355	129069705	dELS,CTCF-bound
G01-GEA070HI	Male	chr9	76456400	C	A	E4 Multi-tissue	4.72987	+	EH38E2698550	chr9	76456242	76456591	dELS,CTCF-bound
3C565	Male	chr9	91197382	T	G	E4 Multi-tissue	4.72921	-	EH38E2706723	chr9	91197353	91197668	dELS,CTCF-bound
3B334	Female	chr4	17614673	G	A	CTCF CTCF-Cohesin	4.72901	-	EH38E2284366	chr4	17614436	17614786	PLS,CTCF-bound
G01-GEA289HI	Female	chr1	164712475	G	A	TF3 FOXA1 / AR / ESR1	4.72637	+	EH38E1393217	chr1	164712190	164712538	dELS
2F730	Male	chr1	155061828	C	T	CTCF CTCF-Cohesin	4.72527	+	EH38E1386788	chr1	155061553	155061903	dELS,CTCF-bound
G01-GEA118HI	Female	chr17	81057665	C	T	E4 Multi-tissue	4.72112	+	EH38E1891766	chr17	81057547	81057734	dELS,CTCF-bound
3C563	Male	chr10	3810339	C	T	TF5 AR	4.71947	-	EH38E1443190	chr10	3810174	3810519	dELS
G01-GEA161HI	Male	chr2	151828193	C	CG	CTCF CTCF-Cohesin	4.71703	+	EH38E2041661	chr2	151828169	151828345	pELS,CTCF-bound
G01-GEA309HI	Male	chr1	151992746	G	C	CTCF CTCF-Cohesin	4.71491	+	EH38E1384788	chr1	151992430	151992774	PLS,CTCF-bound
G01-GEA211HI	Male	chr22	50530299	TCCCGGCCTCGCCCGACGCTCGGGC	T	E4 Multi-tissue	4.71305	-	EH38E2173232	chr22	50530211	50530509	pELS,CTCF-bound
G01-GEA148HI	Female	chr3	42600472	G	T	E5 B-cell-like	4.71253	-	EH38E2195475	chr3	42600336	42600686	PLS,CTCF-bound
G01-GEA335HI	Male	chr7	2622412	G	A	E4 Multi-tissue	4.71209	+	EH38E2529760	chr7	2622192	2622530	dELS,CTCF-bound
G01-GEA032HI	Female	chr14	20684557	C	G	CTCF CTCF-Cohesin	4.71012	+	EH38E1701166	chr14	20684307	20684633	PLS,CTCF-bound
G01-GEA136HI	Male	chr2	172102608	C	T	P Promoter	4.70778	+	EH38E2051412	chr2	172102555	172102772	pELS,CTCF-bound
3G089	Male	chr4	6909180	G	A	CTCF CTCF-Cohesin	4.7064	-	EH38E2278634	chr4	6909068	6909320	pELS,CTCF-bound
G01-GEA167HI	Male	chr17	41579690	G	A	CTCF CTCF-Cohesin	4.70184	-	EH38E1862679	chr17	41579550	41579900	dELS,CTCF-bound
G01-GEA232HI	Male	chr7	1538143	G	C	E4 Multi-tissue	4.70053	-	EH38E2528642	chr7	1537965	1538314	dELS,CTCF-bound
G01-GEA124HI	Male	chr16	11587353	G	C	CTCF CTCF-Cohesin	4.69756	-	EH38E1801976	chr16	11587174	11587414	PLS,CTCF-bound
3C546	Male	chr4	82721959	TAGCATCAGTAACACTGG	T	E12 Erythroblast-like	4.69576	+	EH38E2308134	chr4	82721898	82722114	dELS,CTCF-bound
3C562	Male	chr10	52864789	T	C	E5 B-cell-like	4.69575	+	EH38E1468552	chr10	52864466	52864816	dELS,CTCF-bound
G01-GEA136HI	Male	chr8	90671039	G	T	TF3 FOXA1 / AR / ESR1	4.69565	-	EH38E2646562	chr8	90670914	90671262	dELS
G01-GEA140HI	Male	chr6	30955858	T	TCCCAGCC	E12 Erythroblast-like	4.69356	-	EH38E2458786	chr6	30955641	30955987	PLS,CTCF-bound
G01-GEA139HI	Male	chr20	19758736	TTCTACCTGCAGGGC	T	E5 B-cell-like	4.68829	+	EH38E2102093	chr20	19758549	19758776	pELS,CTCF-bound
G01-GEA147HI	Male	chr14	30559107	C	A	CTCF CTCF-Cohesin	4.68795	+	EH38E1705813	chr14	30558932	30559281	PLS,CTCF-bound
G01-GEA279HI	Female	chr4	154492116	C	G	CTCF CTCF-Cohesin	4.68483	-	EH38E2337790	chr4	154491811	154492161	pELS
G01-GEA185HI	Female	chr1	10980313	C	T	CTCF CTCF-Cohesin	4.68451	+	EH38E1318544	chr1	10980118	10980468	pELS,CTCF-bound
3E467	Female	chr19	35758584	T	C	CTCF CTCF-Cohesin	4.68377	-	EH38E1951223	chr19	35758373	35758703	pELS,CTCF-bound
G01-GEA158HI	Male	chr1	85260151	A	G	E4 Multi-tissue	4.68349	-	EH38E1363692	chr1	85260048	85260251	pELS,CTCF-bound
G01-GEA193HI	Male	chr13	24922860	C	T	E5 B-cell-like	4.68259	-	EH38E1661090	chr13	24922783	24923132	PLS,CTCF-bound
4B710	Male	chr8	30723087	C	A	TF3 FOXA1 / AR / ESR1	4.68121	-	EH38E2622293	chr8	30722897	30723243	dELS
G01-GEA307HI	Female	chr19	41176186	T	G	E5 B-cell-like	4.67982	+	EH38E1954584	chr19	41176161	41176505	dELS
G01-GEA180HI	Male	chr16	30096448	G	A	E4 Multi-tissue	4.6755	-	EH38E1811210	chr16	30096106	30096455	PLS,CTCF-bound
G01-GEA262HI	Female	chr1	225813678	T	G	E4 Multi-tissue	4.67281	+	EH38E1427221	chr1	225813467	225813817	dELS,CTCF-bound
3B479	Male	chr11	77035873	G	A	TF3 FOXA1 / AR / ESR1	4.67163	+	EH38E1554438	chr11	77035562	77035895	pELS
G01-GEA167HI	Male	chr2	209424035	G	A	CTCF CTCF-Cohesin	4.67073	-	EH38E2070709	chr2	209423757	209424106	PLS,CTCF-bound
G01-GEA249HI	Male	chr1	167722512	G	A	CTCF CTCF-Cohesin	4.67007	+	EH38E1394934	chr1	167722279	167722523	pELS,CTCF-bound
G01-GEA180HI	Male	chr1	53146275	G	A	E12 Erythroblast-like	4.66703	-	EH38E1347989	chr1	53146240	53146590	dELS,CTCF-bound
G01-GEA204HI	Male	chr2	42811432	G	A	CTCF CTCF-Cohesin	4.66505	-	EH38E1991923	chr2	42811156	42811460	dELS,CTCF-bound
3B374	Male	chr7	100894921	G	GC	CTCF CTCF-Cohesin	4.66497	+	EH38E2576022	chr7	100894809	100895152	pELS,CTCF-bound
G01-GEA251HI	Male	chr1	53592918	G	A	CTCF CTCF-Cohesin	4.66098	-	EH38E1348344	chr1	53592600	53592947	dELS,CTCF-bound
G01-GEA307HI	Female	chr3	120439120	C	T	E4 Multi-tissue	4.66096	-	EH38E2231292	chr3	120439039	120439389	dELS
G01-GEA239HI	Male	chr12	45216090	T	G	E5 B-cell-like	4.65453	-	EH38E1607181	chr12	45215898	45216244	PLS,CTCF-bound
G01-GEA132HI	Male	chr12	104215762	C	T	CTCF CTCF-Cohesin	4.65439	-	EH38E1639217	chr12	104215584	104215929	PLS,CTCF-bound
G01-GEA224HI	Female	chr7	965166	G	GGAAACT	CTCF CTCF-Cohesin	4.65163	+	EH38E2528082	chr7	964862	965212	dELS,CTCF-bound
G01-GEA258HI	Female	chr18	9366402	G	T	CTCF CTCF-Cohesin	4.6501	-	EH38E1899119	chr18	9366175	9366513	dELS,CTCF-bound
G01-GEA284HI	Male	chr14	103385628	C	T	CTCF CTCF-Cohesin	4.64711	-	EH38E1744918	chr14	103385592	103385760	PLS,CTCF-bound
G01-GEA003HI	Male	chr17	31559011	CGTCGGGACCCCATCCCCGGGGCAGTGCGGGCCACCCGG	C	CTCF CTCF-Cohesin	4.64578	+	EH38E1856227	chr17	31558816	31559033	pELS,CTCF-bound
4B713	Male	chr14	63853505	C	T	CTCF CTCF-Cohesin	4.64208	+	EH38E1720724	chr14	63853243	63853591	pELS,CTCF-bound
G01-GEA224HI	Female	chr1	80217615	T	A	E4 Multi-tissue	4.64031	+	EH38E1361554	chr1	80217434	80217701	CTCF-only,CTCF-bound
G01-GEA023HI	Male	chr16	77547	C	G	CTCF CTCF-Cohesin	4.63598	+	EH38E1794331	chr16	77374	77693	pELS,CTCF-bound
G01-GEA040HI	Male	chr3	193782356	AGGG	A	E12 Erythroblast-like	4.63375	+	EH38E2270337	chr3	193782283	193782630	dELS,CTCF-bound
4B710	Male	chr3	38454439	G	A	CTCF CTCF-Cohesin	4.62906	+	EH38E2193263	chr3	38454277	38454508	pELS,CTCF-bound
G01-GEA111HI	Male	chr3	195851021	ACCCCTAGTGGACAGTGTGGGAAGTTCTGGGAGTGTTTCAACGAGGACAGTGATGT	A	E12 Erythroblast-like	4.62781	-	EH38E2272203	chr3	195850875	195851224	DNase-H3K4me3,CTCF-bound
2H163	Male	chr15	75451013	AC	A	CTCF CTCF-Cohesin	4.62758	+	EH38E1778514	chr15	75450851	75451148	pELS,CTCF-bound
G01-GEA226HI	Female	chr20	38033803	C	T	CTCF CTCF-Cohesin	4.62551	-	EH38E2111215	chr20	38033660	38033863	pELS,CTCF-bound
G01-GEA302HI	Male	chr17	82273443	G	A	CTCF CTCF-Cohesin	4.62484	-	EH38E1893235	chr17	82273374	82273570	PLS,CTCF-bound
3E475	Male	chr17	15945112	GC	G	CTCF CTCF-Cohesin	4.6222	+	EH38E1849053	chr17	15944968	15945313	pELS,CTCF-bound
XA214	Female	chr3	193743817	C	T	CTCF CTCF-Cohesin	4.62096	-	EH38E2270308	chr3	193743809	193743973	dELS
3B479	Male	chr11	65492786	T	C	E4 Multi-tissue	4.61998	-	EH38E1545203	chr11	65492691	65492922	dELS,CTCF-bound
G01-GEA100HI	Male	chr17	5111882	T	C	CTCF CTCF-Cohesin	4.61978	-	EH38E1842921	chr17	5111771	5112121	PLS,CTCF-bound
5L790	Male	chr16	87957062	TG	T	CTCF CTCF-Cohesin	4.61939	-	EH38E1836638	chr16	87956812	87957162	dELS,CTCF-bound
3B479	Male	chr5	83474585	CG	C	CTCF CTCF-Cohesin	4.61704	-	EH38E2387794	chr5	83474415	83474765	dELS,CTCF-bound
3A551	Female	chr1	204287257	G	A	E4 Multi-tissue	4.61472	-	EH38E1414303	chr1	204287165	204287376	dELS,CTCF-bound
G01-GEA104HI	Male	chr11	128831319	T	C	L5 Low signal	4.61397	+	EH38E1581424	chr11	128831158	128831505	dELS,CTCF-bound
3C560	Male	chr18	23453523	G	C	CTCF CTCF-Cohesin	4.61354	+	EH38E1904075	chr18	23453405	23453590	PLS,CTCF-bound
G01-GEA104HI	Male	chr1	31937958	CG	C	CTCF CTCF-Cohesin	4.61292	+	EH38E1334664	chr1	31937640	31937990	pELS,CTCF-bound
G01-GEA296HI	Male	chr19	52569791	T	C	E4 Multi-tissue	4.61202	-	EH38E1963053	chr19	52569691	52569946	pELS,CTCF-bound
G01-GEA176HI	Male	chr16	53435592	A	G	P Promoter	4.60985	-	EH38E1816213	chr16	53435421	53435698	pELS,CTCF-bound
G01-GEA240HI	Female	chr10	59991770	G	T	CTCF CTCF-Cohesin	4.60567	-	EH38E1470601	chr10	59991639	59991984	dELS,CTCF-bound
G01-GEA306HI	Male	chr6	168968342	G	T	CTCF CTCF-Cohesin	4.60454	-	EH38E2526020	chr6	168968252	168968592	dELS,CTCF-bound
4B843	Male	chr9	134643102	G	A	CTCF CTCF-Cohesin	4.60353	+	EH38E2735247	chr9	134642835	134643184	pELS,CTCF-bound
G01-GEA271HI	Male	chr9	113591841	C	G	CTCF CTCF-Cohesin	4.59975	-	EH38E2719579	chr9	113591679	113592015	pELS,CTCF-bound
3D628	Male	chr22	39319624	G	A	CTCF CTCF-Cohesin	4.59925	-	EH38E2164583	chr22	39319603	39319953	PLS,CTCF-bound
G01-GEA239HI	Male	chr6	121437574	G	A	E4 Multi-tissue	4.59848	-	EH38E2498620	chr6	121437466	121437627	pELS,CTCF-bound
2F867	Male	chr18	3606077	A	T	E2 Multi-tissue	4.59538	+	EH38E1896089	chr18	3606007	3606342	dELS,CTCF-bound
3B479	Male	chr2	201129312	A	G	CTCF CTCF-Cohesin	4.58957	+	EH38E2065857	chr2	201129224	201129516	PLS,CTCF-bound
3B336	Male	chr4	170090235	G	A	P Promoter	4.58629	-	EH38E2343618	chr4	170090016	170090362	PLS,CTCF-bound
3B374	Male	chr1	181127255	C	T	E4 Multi-tissue	4.58603	-	EH38E1402518	chr1	181127025	181127372	dELS
G01-GEA003HI	Male	chr9	116687228	GACAAGCC	G	E5 B-cell-like	4.58398	-	EH38E2721777	chr9	116687119	116687467	PLS,CTCF-bound
G01-GEA305HI	Male	chr3	69084666	A	G	E4 Multi-tissue	4.57432	+	EH38E2211875	chr3	69084354	69084677	pELS
4B699	Male	chr14	105093885	C	T	CTCF CTCF-Cohesin	4.57357	+	EH38E1746483	chr14	105093751	105094080	pELS,CTCF-bound
G01-GEA278HI	Male	chr20	48828094	C	T	CTCF CTCF-Cohesin	4.5691	+	EH38E2118224	chr20	48827992	48828342	pELS,CTCF-bound
3D632	Male	chr16	57894239	T	G	E4 Multi-tissue	4.56505	-	EH38E1819306	chr16	57893987	57894324	dELS,CTCF-bound
G01-GEA024HI	Female	chr1	224733592	T	A	E4 Multi-tissue	4.56498	+	EH38E1426713	chr1	224733275	224733607	dELS,CTCF-bound
2J788	Male	chr8	40054879	CT	C	TF3 FOXA1 / AR / ESR1	4.56472	-	EH38E2626371	chr8	40054807	40055126	dELS,CTCF-bound
4B858	Male	chr5	124906824	T	G	CTCF CTCF-Cohesin	4.56223	-	EH38E2404741	chr5	124906642	124906971	dELS,CTCF-bound
G01-GEA003HI	Male	chr8	22918453	G	A	E5 B-cell-like	4.56166	+	EH38E2616828	chr8	22918259	22918609	dELS,CTCF-bound
2J788	Male	chr10	22514050	G	T	E4 Multi-tissue	4.55847	+	EH38E1454540	chr10	22513831	22514173	dELS
G01-GEA143HI	Female	chr7	45769146	G	A	CTCF CTCF-Cohesin	4.55402	-	EH38E2554092	chr7	45768876	45769226	PLS,CTCF-bound
G01-GEA271HI	Male	chr17	44095807	G	C	CTCF CTCF-Cohesin	4.55297	-	EH38E1864878	chr17	44095546	44095889	dELS,CTCF-bound
G01-GEA269HI	Male	chr12	40225046	G	T	CTCF CTCF-Cohesin	4.55217	+	EH38E1605256	chr12	40224813	40225162	PLS,CTCF-bound
G01-GEA110HI	Female	chr17	28720009	G	A	CTCF CTCF-Cohesin	4.55212	-	EH38E1854173	chr17	28719717	28720058	PLS,CTCF-bound
G01-GEA229HI	Male	chr14	69151600	C	G	CTCF CTCF-Cohesin	4.55087	+	EH38E1724454	chr14	69151546	69151896	pELS,CTCF-bound
2K890	Male	chr19	41376418	A	C	TF5 AR	4.55057	-	EH38E1954782	chr19	41376377	41376542	PLS,CTCF-bound
G01-GEA192HI	Male	chr1	7479041	C	G	E4 Multi-tissue	4.54912	+	EH38E1315256	chr1	7478880	7479230	dELS
5G257	Male	chr11	9569084	G	A	E4 Multi-tissue	4.54842	-	EH38E1519275	chr11	9568780	9569126	dELS
G01-GEA152HI	Male	chr19	17220342	C	T	E4 Multi-tissue	4.54777	+	EH38E1943189	chr19	17220224	17220434	dELS
G01-GEA229HI	Male	chr14	100019499	A	G	E4 Multi-tissue	4.54568	-	EH38E1741950	chr14	100019239	100019584	PLS,CTCF-bound
5B577	Male	chr5	136132699	GCCGGCGCGGAGC	G	E5 B-cell-like	4.54517	+	EH38E2411408	chr5	136132634	136132981	PLS,CTCF-bound
3B568	Male	chr16	69386028	G	C	E5 B-cell-like	4.54483	-	EH38E1824588	chr16	69385812	69386159	PLS,CTCF-bound
5L790	Male	chr5	147417221	C	G	TF3 FOXA1 / AR / ESR1	4.54334	+	EH38E2418489	chr5	147417117	147417465	dELS,CTCF-bound
G01-GEA041HI	Female	chr12	8027079	G	T	CTCF CTCF-Cohesin	4.53982	-	EH38E1591103	chr12	8026976	8027325	dELS,CTCF-bound
3E473	Male	chr5	59317514	C	G	E4 Multi-tissue	4.53772	+	EH38E2375348	chr5	59317396	59317710	dELS,CTCF-bound
G01-GEA295HI	Male	chr7	100158784	A	AGGGGGC	E12 Erythroblast-like	4.5373	-	EH38E2575372	chr7	100158613	100158963	PLS,CTCF-bound
G01-GEA211HI	Male	chr6	43856336	T	A	CTCF CTCF-Cohesin	4.53717	-	EH38E2468900	chr6	43856270	43856457	dELS,CTCF-bound
G01-GEA167HI	Male	chr20	17557796	C	G	E4 Multi-tissue	4.53595	-	EH38E2100711	chr20	17557715	17557875	pELS
G01-GEA309HI	Male	chr16	18983850	C	A	CTCF CTCF-Cohesin	4.53541	-	EH38E1805613	chr16	18983767	18984101	PLS,CTCF-bound
G01-GEA028HI	Male	chr10	31928936	C	T	CTCF CTCF-Cohesin	4.53336	+	EH38E1460089	chr10	31928662	31928993	PLS,CTCF-bound
4B702	Male	chr2	27495330	AC	A	CTCF CTCF-Cohesin	4.53336	+	EH38E1982840	chr2	27495088	27495438	PLS,CTCF-bound
4B716	Male	chr4	163494544	C	T	E5 B-cell-like	4.53078	+	EH38E2340973	chr4	163494411	163494761	PLS,CTCF-bound
3C545	Male	chr2	11343730	G	C	CTCF CTCF-Cohesin	4.52952	+	EH38E1973424	chr2	11343724	11344071	pELS,CTCF-bound
G01-GEA287HI	Male	chr17	40177498	AGCCGCC	A	E4 Multi-tissue	4.52947	+	EH38E1861523	chr17	40177289	40177637	pELS,CTCF-bound
G01-GEA241HI	Male	chr7	77685566	T	G	E4 Multi-tissue	4.52621	-	EH38E2565363	chr7	77685243	77685591	dELS,CTCF-bound
2J788	Male	chr16	10617428	G	A	CTCF CTCF-Cohesin	4.52535	-	EH38E1801063	chr16	10617227	10617577	dELS,CTCF-bound
3C562	Male	chr3	49554653	GCCCGGCGGCGCCGGCCCCGGCCCGGGCCCCGGCCCCGGC	G	CTCF CTCF-Cohesin	4.52408	+	EH38E2200413	chr3	49554649	49554872	pELS,CTCF-bound
G01-GEA307HI	Female	chr5	135185863	G	C	TF3 FOXA1 / AR / ESR1	4.52233	+	EH38E2410635	chr5	135185685	135186008	dELS
G01-GEA224HI	Female	chr11	134276319	G	T	CTCF CTCF-Cohesin	4.52005	+	EH38E1584640	chr11	134276096	134276446	pELS,CTCF-bound
4B693	Male	chr13	20704061	GGCGGGCAGGCGCCCCGCGCGGCC	G	CTCF CTCF-Cohesin	4.51612	+	EH38E1658806	chr13	20704055	20704402	pELS,CTCF-bound
G01-GEA239HI	Male	chr10	24196626	G	C	CTCF CTCF-Cohesin	4.51355	-	EH38E1455449	chr10	24196539	24196698	dELS,CTCF-bound
G01-GEA143HI	Female	chr11	126113714	G	A	CTCF CTCF-Cohesin	4.50831	+	EH38E1579602	chr11	126113626	126113975	dELS,CTCF-bound
G01-GEA176HI	Male	chr2	227406280	G	A	CTCF CTCF-Cohesin	4.5071	-	EH38E2080600	chr2	227406195	227406544	dELS,CTCF-bound
4B702	Male	chr15	31328076	T	TGGGCTGG	CTCF CTCF-Cohesin	4.50602	-	EH38E1750889	chr15	31327871	31328200	pELS,CTCF-bound
G01-GEA334HI	Male	chr1	42334422	G	A	CTCF CTCF-Cohesin	4.50598	+	EH38E1341703	chr1	42334231	42334579	pELS,CTCF-bound
G01-GEA167HI	Male	chr8	133249994	C	T	E12 Erythroblast-like	4.50439	-	EH38E2669885	chr8	133249778	133250125	dELS,CTCF-bound
G01-GEA101HI	Male	chr6	2225574	C	G	E4 Multi-tissue	4.50419	+	EH38E2439650	chr6	2225530	2225745	dELS,CTCF-bound
4B691	Female	chr1	10836018	G	A	CTCF CTCF-Cohesin	4.50401	-	EH38E1318425	chr1	10835865	10836214	dELS,CTCF-bound
G01-GEA260HI	Male	chr20	22512562	C	A	E4 Multi-tissue	4.50251	-	EH38E2103614	chr20	22512507	22512847	dELS,CTCF-bound
G01-GEA101HI	Male	chr13	28636978	G	A	E7 Monocyte / Macrophage	4.499	-	EH38E1663397	chr13	28636728	28637077	dELS,CTCF-bound
XA214	Female	chr17	59311171	G	T	CTCF CTCF-Cohesin	4.49795	-	EH38E1874629	chr17	59310995	59311345	dELS,CTCF-bound
G01-GEA232HI	Male	chr4	128454496	G	T	CTCF CTCF-Cohesin	4.49393	-	EH38E2326972	chr4	128454301	128454649	dELS,CTCF-bound
4B710	Male	chr7	130901474	C	T	E4 Multi-tissue	4.49336	-	EH38E2590666	chr7	130901353	130901676	dELS,CTCF-bound
G01-GEA190HI	Male	chr2	132632482	C	T	E4 Multi-tissue	4.4929	+	EH38E2033554	chr2	132632379	132632613	dELS,CTCF-bound
G01-GEA015HI	Male	chr6	158284368	T	C	E5 B-cell-like	4.49127	-	EH38E2519689	chr6	158284320	158284658	pELS,CTCF-bound
G01-GEA143HI	Female	chr12	106108622	G	T	E4 Multi-tissue	4.49005	-	EH38E1640778	chr12	106108401	106108748	dELS,CTCF-bound
XH678	Male	chr16	10514774	G	A	CTCF CTCF-Cohesin	4.47748	-	EH38E1800969	chr16	10514656	10515005	dELS,CTCF-bound
G01-GEA024HI	Female	chr6	157221363	G	T	CTCF CTCF-Cohesin	4.47735	-	EH38E2518703	chr6	157221229	157221560	dELS,CTCF-bound
2H163	Male	chr12	52903587	G	A	E4 Multi-tissue	4.47572	-	EH38E1612993	chr12	52903449	52903742	dELS,CTCF-bound
3C545	Male	chr3	4303571	C	T	CTCF CTCF-Cohesin	4.4714	-	EH38E2174658	chr3	4303482	4303653	PLS,CTCF-bound
4B691	Female	chr13	107210772	A	T	E7 Monocyte / Macrophage	4.47058	+	EH38E1696206	chr13	107210713	107210961	dELS,CTCF-bound
4B699	Male	chr19	41439983	C	G	E5 B-cell-like	4.46954	-	EH38E1954847	chr19	41439825	41440175	PLS,CTCF-bound
4B858	Male	chr5	62354260	G	C	CTCF CTCF-Cohesin	4.46931	-	EH38E2376905	chr5	62354086	62354405	dELS,CTCF-bound
5B577	Male	chr2	190648317	G	A	CTCF CTCF-Cohesin	4.46851	+	EH38E2060890	chr2	190648252	190648498	pELS,CTCF-bound
G01-GEA030HI	Male	chr13	98565757	T	C	E12 Erythroblast-like	4.46544	+	EH38E1691782	chr13	98565724	98565913	dELS,CTCF-bound
G01-GEA129HI	Male	chr19	7398968	G	C	E4 Multi-tissue	4.46459	+	EH38E1936438	chr19	7398728	7399070	dELS,CTCF-bound
G01-GEA129HI	Male	chr9	34652092	G	GC	E12 Erythroblast-like	4.46448	+	EH38E2691360	chr9	34651998	34652348	PLS,CTCF-bound
3B334	Female	chr1	155910965	C	CT	CTCF CTCF-Cohesin	4.46361	+	EH38E1387421	chr1	155910767	155911105	PLS,CTCF-bound
3B336	Male	chr18	61893741	GGCGCGCGCGCACGTGCACACCCAGGGGC	G	CTCF CTCF-Cohesin	4.45775	-	EH38E1922194	chr18	61893614	61893958	PLS,CTCF-bound
G01-GEA012HI	Female	chr11	118928892	A	G	E4 Multi-tissue	4.45676	+	EH38E1574611	chr11	118928754	118929002	dELS,CTCF-bound
G01-GEA163HI	Male	chr22	28742445	G	T	P Promoter	4.45657	-	EH38E2156368	chr22	28742374	28742719	pELS,CTCF-bound
G01-GEA226HI	Female	chr9	136902643	C	T	E4 Multi-tissue	4.45577	-	EH38E2737310	chr9	136902470	136902820	dELS,CTCF-bound
G01-GEA132HI	Male	chr2	10042812	T	C	CTCF CTCF-Cohesin	4.45337	+	EH38E1972352	chr2	10042699	10043031	pELS,CTCF-bound
G01-GEA229HI	Male	chr10	122374574	G	C	E5 B-cell-like	4.44958	-	EH38E1506386	chr10	122374402	122374747	PLS,CTCF-bound
4B710	Male	chr9	127734762	C	T	CTCF CTCF-Cohesin	4.44793	-	EH38E2728737	chr9	127734626	127734972	pELS,CTCF-bound
5L790	Male	chr7	158818573	C	G	CTCF CTCF-Cohesin	4.44205	+	EH38E2605378	chr7	158818494	158818844	dELS,CTCF-bound
G01-GEA241HI	Male	chr1	184491850	T	C	CTCF CTCF-Cohesin	4.43499	+	EH38E1404752	chr1	184491589	184491936	dELS
G01-GEA124HI	Male	chr20	3407337	T	C	CTCF CTCF-Cohesin	4.43451	+	EH38E2093450	chr20	3407042	3407385	pELS,CTCF-bound
G01-GEA161HI	Male	chr7	192117	G	A	CTCF CTCF-Cohesin	4.43417	+	EH38E2527295	chr7	192045	192246	pELS,CTCF-bound
G01-GEA260HI	Male	chr8	109334590	G	GA	CTCF CTCF-Cohesin	4.42752	-	EH38E2656785	chr8	109334501	109334708	pELS,CTCF-bound
G01-GEA232HI	Male	chr3	8658633	GAC	G	E5 B-cell-like	4.42682	-	EH38E2176595	chr3	8658391	8658740	dELS,CTCF-bound
G01-GEA266HI	Male	chr2	202375156	G	C	CTCF CTCF-Cohesin	4.42653	+	EH38E2066745	chr2	202375126	202375449	pELS,CTCF-bound
G01-GEA218HI	Male	chr1	178644359	T	G	E12 Erythroblast-like	4.42591	-	EH38E1400967	chr1	178644332	178644595	dELS
G01-GEA159HI	Female	chr2	84881839	G	A	E4 Multi-tissue	4.42539	-	EH38E2013256	chr2	84881702	84881981	pELS,CTCF-bound
3E475	Male	chr11	82900826	T	C	E4 Multi-tissue	4.42353	-	EH38E1556944	chr11	82900706	82901056	pELS,CTCF-bound
G01-GEA154HI	Male	chr9	76049606	AC	A	E12 Erythroblast-like	4.42191	-	EH38E2698317	chr9	76049396	76049740	dELS,CTCF-bound
G01-GEA232HI	Male	chr11	134069028	C	A	P Promoter	4.42179	-	EH38E1584485	chr11	134068822	134069172	PLS,CTCF-bound
3C545	Male	chr2	121530900	T	G	CTCF CTCF-Cohesin	4.42048	+	EH38E2029391	chr2	121530900	121531247	PLS,CTCF-bound
4B691	Female	chr11	120953011	C	T	CTCF CTCF-Cohesin	4.42014	-	EH38E1576216	chr11	120952812	120953162	dELS,CTCF-bound
G01-GEA229HI	Male	chr20	56555213	G	A	CTCF CTCF-Cohesin	4.41777	-	EH38E2123639	chr20	56554918	56555267	dELS,CTCF-bound
G01-GEA124HI	Male	chr1	151301153	TG	T	CTCF CTCF-Cohesin	4.41298	+	EH38E1384210	chr1	151300992	151301254	pELS,CTCF-bound
5L790	Male	chr20	37406722	GTGCGCA	G	CTCF CTCF-Cohesin	4.41166	-	EH38E2110701	chr20	37406515	37406853	dELS,CTCF-bound
G01-GEA103HI	Male	chr16	81267037	T	G	E4 Multi-tissue	4.40694	-	EH38E1831200	chr16	81266746	81267089	dELS,CTCF-bound
G01-GEA224HI	Female	chr18	61893170	G	C	CTCF CTCF-Cohesin	4.39991	-	EH38E1922192	chr18	61892895	61893245	pELS,CTCF-bound
G01-GEA152HI	Male	chr1	23743065	C	T	CTCF CTCF-Cohesin	4.39973	+	EH38E1328103	chr1	23743058	23743217	PLS,CTCF-bound
G01-GEA023HI	Male	chr14	49893583	C	G	CTCF CTCF-Cohesin	4.39861	+	EH38E1712397	chr14	49893341	49893691	pELS,CTCF-bound
G01-GEA139HI	Male	chr17	40443334	C	T	CTCF CTCF-Cohesin	4.39128	+	EH38E1861792	chr17	40443213	40443533	PLS,CTCF-bound
3C139	Male	chr18	23609807	T	C	E12 Erythroblast-like	4.39019	+	EH38E1904220	chr18	23609690	23609978	dELS
G01-GEA101HI	Male	chr2	121128903	T	C	CTCF CTCF-Cohesin	4.38794	-	EH38E2029120	chr2	121128738	121129085	dELS,CTCF-bound
5F620	Male	chr3	112991313	C	A	P Promoter	4.38752	-	EH38E2227654	chr3	112991105	112991454	PLS,CTCF-bound
G01-GEA169HI	Male	chr2	101961650	G	A	CTCF CTCF-Cohesin	4.38518	-	EH38E2020248	chr2	101961329	101961677	pELS,CTCF-bound
G01-GEA214HI	Male	chr2	202376031	T	TGCCCACCGCAGCCCACCGCA	CTCF CTCF-Cohesin	4.38419	-	EH38E2066747	chr2	202376010	202376359	pELS,CTCF-bound
3D615	Male	chr16	85291623	G	A	E12 Erythroblast-like	4.38409	-	EH38E1834119	chr16	85291548	85291827	dELS,CTCF-bound
G01-GEA288HI	Male	chr2	23542042	G	A	E4 Multi-tissue	4.38112	-	EH38E1979973	chr2	23541834	23542161	dELS,CTCF-bound
G01-GEA149HI	Male	chr9	128882169	G	C	CTCF CTCF-Cohesin	4.37599	+	EH38E2729926	chr9	128881899	128882249	PLS,CTCF-bound
2F867	Male	chr22	46085942	C	T	E12 Erythroblast-like	4.37517	-	EH38E2170236	chr22	46085684	46086019	PLS
G01-GEA027HI	Male	chr11	65041418	G	C	CTCF CTCF-Cohesin	4.37496	-	EH38E1544668	chr11	65041286	65041493	pELS,CTCF-bound
3C565	Male	chr20	297966	AGGCGGCGGCGGCCGCCATGGCGACCCCGGCCAGGCCCGGCGAGGCCGAGGACGCGGCCGAGCGGCCCCTCCAGGATGAGCC	A	CTCF CTCF-Cohesin	4.37079	+	EH38E2091280	chr20	297932	298092	pELS,CTCF-bound
G01-GEA167HI	Male	chr10	110918502	TCTC	T	CTCF CTCF-Cohesin	4.36905	+	EH38E1499412	chr10	110918455	110918800	pELS,CTCF-bound
3C573	Male	chr8	97643704	TCGG	T	CTCF CTCF-Cohesin	4.36833	-	EH38E2650306	chr8	97643596	97643836	pELS,CTCF-bound
3A551	Female	chr16	50585501	C	T	E4 Multi-tissue	4.36731	-	EH38E1814923	chr16	50585349	50585697	dELS,CTCF-bound
G01-GEA283HI	Male	chr22	49632633	C	T	CTCF CTCF-Cohesin	4.36698	-	EH38E2172349	chr22	49632501	49632793	dELS,CTCF-bound
G01-GEA158HI	Male	chr22	34800440	T	C	E4 Multi-tissue	4.36591	-	EH38E2160481	chr22	34800250	34800585	dELS
G01-GEA143HI	Female	chr19	7294950	GCCAGGCC	G	CTCF CTCF-Cohesin	4.36173	+	EH38E1936365	chr19	7294769	7295119	pELS,CTCF-bound
3C544	Female	chr5	159879364	G	A	E12 Erythroblast-like	4.36065	-	EH38E2426328	chr5	159879200	159879550	dELS,CTCF-bound
G01-GEA096HI	Male	chr1	235917544	T	C	CTCF CTCF-Cohesin	4.35623	-	EH38E1434630	chr1	235917479	235917800	dELS,CTCF-bound
G01-GEA003HI	Male	chr9	99368575	C	T	E4 Multi-tissue	4.35443	-	EH38E2712355	chr9	99368362	99368712	PLS,CTCF-bound
5L790	Male	chr3	42033079	A	C	TF5 AR	4.35342	-	EH38E2195030	chr3	42033059	42033395	dELS,CTCF-bound
3D612	Male	chr1	230105006	C	T	CTCF CTCF-Cohesin	4.35179	-	EH38E1430375	chr1	230104780	230105126	dELS,CTCF-bound
G01-GEA283HI	Male	chr2	46299861	T	C	E4 Multi-tissue	4.3513	-	EH38E1994780	chr2	46299590	46299939	dELS,CTCF-bound
G01-GEA220HI	Male	chr14	73787101	C	A	CTCF CTCF-Cohesin	4.35012	+	EH38E1727420	chr14	73787073	73787343	PLS,CTCF-bound
3C560	Male	chr1	21784048	G	A	E4 Multi-tissue	4.34923	-	EH38E1326456	chr1	21783896	21784129	pELS
G01-GEA149HI	Male	chr2	241636769	G	C	CTCF CTCF-Cohesin	4.34839	+	EH38E2090841	chr2	241636550	241636774	pELS,CTCF-bound
G01-GEA140HI	Male	chr2	88055849	G	C	CTCF CTCF-Cohesin	4.34565	+	EH38E2015074	chr2	88055690	88056039	PLS,CTCF-bound
G01-GEA287HI	Male	chr12	27555095	G	A	TF3 FOXA1 / AR / ESR1	4.34535	+	EH38E1601161	chr12	27555031	27555227	dELS,CTCF-bound
2H163	Male	chr2	169694382	C	T	CTCF CTCF-Cohesin	4.34467	+	EH38E2050036	chr2	169694329	169694679	PLS,CTCF-bound
G01-GEA161HI	Male	chr12	2163376	G	A	E12 Erythroblast-like	4.34326	+	EH38E1586816	chr12	2163183	2163493	dELS,CTCF-bound
4B710	Male	chr3	48466276	C	T	E4 Multi-tissue	4.34319	+	EH38E2199590	chr3	48465987	48466281	PLS,CTCF-bound
3C565	Male	chr3	49199365	G	A	E12 Erythroblast-like	4.34302	-	EH38E2200132	chr3	49199250	49199593	PLS,CTCF-bound
G01-GEA310HI	Male	chr19	51926745	C	T	E4 Multi-tissue	4.34061	-	EH38E1962759	chr19	51926739	51926972	pELS,CTCF-bound
G01-GEA313HI	Male	chr1	1438259	G	A	CTCF CTCF-Cohesin	4.34061	-	EH38E1310931	chr1	1438067	1438393	dELS,CTCF-bound
4B716	Male	chr1	112701044	A	G	CTCF CTCF-Cohesin	4.33949	-	EH38E1377166	chr1	112700783	112701086	dELS,CTCF-bound
G01-GEA287HI	Male	chr1	19644111	G	GGGGC	CTCF CTCF-Cohesin	4.33843	-	EH38E1324808	chr1	19644065	19644415	PLS,CTCF-bound
G01-GEA129HI	Male	chr16	54930745	C	A	CTCF CTCF-Cohesin	4.33818	-	EH38E1817151	chr16	54930513	54930863	PLS,CTCF-bound
G01-GEA191HI	Male	chr1	183734986	G	T	E4 Multi-tissue	4.33645	-	EH38E1404166	chr1	183734741	183735084	dELS,CTCF-bound
G01-GEA241HI	Male	chr15	87477975	C	T	E4 Multi-tissue	4.33548	-	EH38E1785480	chr15	87477817	87478116	dELS,CTCF-bound
G01-GEA105HI	Male	chr1	165829048	G	C	CTCF CTCF-Cohesin	4.33537	-	EH38E1393849	chr1	165828912	165829257	pELS,CTCF-bound
G01-GEA025HI	Male	chr8	9058157	G	A	CTCF CTCF-Cohesin	4.33414	-	EH38E2609216	chr8	9058069	9058417	dELS,CTCF-bound
2F730	Male	chr16	4802907	TGGGGCGCCCGCTTGGGGGCGGAGCTCCC	T	CTCF CTCF-Cohesin	4.33393	+	EH38E1798733	chr16	4802652	4802998	PLS,CTCF-bound
G01-GEA180HI	Male	chr6	37818796	G	A	E12 Erythroblast-like	4.3338	-	EH38E2464612	chr6	37818618	37818868	pELS,CTCF-bound
G01-GEA100HI	Male	chr1	109792309	G	C	E4 Multi-tissue	4.33277	-	EH38E1375118	chr1	109792139	109792457	dELS,CTCF-bound
G01-GEA150HI	Male	chr12	124626592	C	T	E4 Multi-tissue	4.3324	-	EH38E1653511	chr12	124626284	124626633	dELS,CTCF-bound
G01-GEA148HI	Female	chr1	32222015	T	C	E4 Multi-tissue	4.32801	+	EH38E1334906	chr1	32221988	32222191	pELS,CTCF-bound
XH678	Male	chr20	44703011	G	T	CTCF CTCF-Cohesin	4.32537	-	EH38E2115025	chr20	44702824	44703172	dELS,CTCF-bound
G01-GEA001HI	Male	chr6	26020720	G	A	E4 Multi-tissue	4.32409	+	EH38E2455647	chr6	26020625	26020863	pELS,CTCF-bound
G01-GEA143HI	Female	chr20	62386731	TG	T	CTCF CTCF-Cohesin	4.31615	+	EH38E2128025	chr20	62386617	62386770	pELS,CTCF-bound
G01-GEA023HI	Male	chr16	14634262	TTTTG	T	TF3 FOXA1 / AR / ESR1	4.31522	-	EH38E1803989	chr16	14633987	14634337	pELS,CTCF-bound
3D632	Male	chr17	8154317	G	A	E5 B-cell-like	4.31444	-	EH38E1845026	chr17	8154225	8154572	pELS,CTCF-bound
G01-GEA104HI	Male	chr17	15651851	G	A	CTCF CTCF-Cohesin	4.31391	+	EH38E1848947	chr17	15651652	15651994	PLS,CTCF-bound
G01-GEA059HI	Female	chr7	140404097	C	T	CTCF CTCF-Cohesin	4.31349	-	EH38E2596357	chr7	140403861	140404194	PLS,CTCF-bound
G01-GEA208HI	Male	chr3	196187117	C	A	E12 Erythroblast-like	4.30847	+	EH38E2272497	chr3	196186789	196187124	dELS,CTCF-bound
G01-GEA288HI	Male	chr7	73557277	G	A	E5 B-cell-like	4.30741	-	EH38E2563098	chr7	73557084	73557434	pELS,CTCF-bound
G01-GEA003HI	Male	chr4	153204497	T	A	E4 Multi-tissue	4.30602	-	EH38E2337054	chr4	153204199	153204543	PLS
G01-GEA009HI	Male	chr10	133324281	C	T	E4 Multi-tissue	4.30285	+	EH38E1513081	chr10	133324167	133324517	dELS,CTCF-bound
2K890	Male	chr17	82333083	C	G	E7 Monocyte / Macrophage	4.30028	-	EH38E1893334	chr17	82332878	82333227	pELS,CTCF-bound
2F957	Male	chr8	116887666	G	A	CTCF CTCF-Cohesin	4.29914	-	EH38E2658963	chr8	116887513	116887859	dELS,CTCF-bound
G01-GEA278HI	Male	chr18	3450255	G	C	E4 Multi-tissue	4.2977	-	EH38E1895939	chr18	3449957	3450307	PLS,CTCF-bound
G01-GEA226HI	Female	chr9	129413017	C	T	CTCF CTCF-Cohesin	4.29746	+	EH38E2730448	chr9	129412999	129413349	dELS,CTCF-bound
G01-GEA169HI	Male	chr6	12343899	G	A	E4 Multi-tissue	4.28753	+	EH38E2446671	chr6	12343589	12343937	dELS,CTCF-bound
3B334	Female	chr11	65181034	G	C	CTCF CTCF-Cohesin	4.28225	+	EH38E1544825	chr11	65180967	65181141	PLS,CTCF-bound
G01-GEA279HI	Female	chr1	147599487	GC	G	CTCF CTCF-Cohesin	4.28088	+	EH38E1382705	chr1	147599338	147599539	dELS,CTCF-bound
G01-GEA217HI	Male	chr11	65150823	G	A	CTCF CTCF-Cohesin	4.27935	-	EH38E1544803	chr11	65150595	65150945	dELS,CTCF-bound
2K890	Male	chr7	517299	C	G	E4 Multi-tissue	4.27694	-	EH38E2527635	chr7	517179	517429	dELS,CTCF-bound
2J788	Male	chr20	21303762	C	G	P Promoter	4.27253	-	EH38E2103109	chr20	21303588	21303808	PLS,CTCF-bound
G01-GEA090HI	Male	chr13	44917944	G	T	E5 B-cell-like	4.2685	-	EH38E1673110	chr13	44917884	44918233	dELS,CTCF-bound
G01-GEA264HI	Male	chr7	140641204	A	T	E4 Multi-tissue	4.26786	-	EH38E2596531	chr7	140641084	140641427	pELS,CTCF-bound
4B713	Male	chr10	68897590	A	AGAT	CTCF CTCF-Cohesin	4.26646	-	EH38E1474743	chr10	68897558	68897730	CTCF-only,CTCF-bound
2F867	Male	chr13	112689076	C	T	CTCF CTCF-Cohesin	4.26551	-	EH38E1699211	chr13	112688992	112689312	pELS,CTCF-bound
G01-GEA305HI	Male	chr17	76529914	G	A	E12 Erythroblast-like	4.26404	-	EH38E1887130	chr17	76529700	76529969	dELS,CTCF-bound
G01-GEA003HI	Male	chr20	23629260	A	C	E4 Multi-tissue	4.26379	-	EH38E2104361	chr20	23629050	23629393	dELS,CTCF-bound
G01-GEA281HI	Male	chr10	3486546	A	C	E4 Multi-tissue	4.26222	-	EH38E1442891	chr10	3486408	3486732	dELS,CTCF-bound
3C560	Male	chr3	4866991	T	C	E11 T-cell	4.25927	+	EH38E2175153	chr3	4866866	4867215	dELS
3C545	Male	chr2	61854046	C	T	P Promoter	4.25896	-	EH38E2002184	chr2	61853922	61854271	PLS,CTCF-bound
G01-GEA110HI	Female	chr17	17693781	G	T	CTCF CTCF-Cohesin	4.25893	-	EH38E1850368	chr17	17693656	17694005	dELS,CTCF-bound
3E466	Male	chr12	109154686	G	C	E5 B-cell-like	4.25879	+	EH38E1642810	chr12	109154519	109154867	dELS,CTCF-bound
G01-GEA334HI	Male	chr7	47475711	A	C	TF3 FOXA1 / AR / ESR1	4.25501	-	EH38E2555159	chr7	47475483	47475732	dELS,CTCF-bound
G01-GEA334HI	Male	chr14	90382787	CCGCG	C	E4 Multi-tissue	4.25446	-	EH38E1735329	chr14	90382608	90382958	pELS,CTCF-bound
G01-GEA241HI	Male	chr4	6689034	C	T	E5 B-cell-like	4.25417	+	EH38E2278386	chr4	6688989	6689295	pELS,CTCF-bound
G01-GEA003HI	Male	chr18	49726190	A	G	E7 Monocyte / Macrophage	4.24543	+	EH38E1916045	chr18	49726174	49726524	dELS,CTCF-bound
G01-GEA204HI	Male	chr22	45329825	G	A	E4 Multi-tissue	4.24206	-	EH38E2169461	chr22	45329532	45329881	dELS
G01-GEA158HI	Male	chr3	71191151	C	T	E4 Multi-tissue	4.24032	-	EH38E2213099	chr3	71190997	71191339	dELS,CTCF-bound
2F867	Male	chr13	19960128	G	A	CTCF CTCF-Cohesin	4.23939	-	EH38E1658340	chr13	19960070	19960420	pELS,CTCF-bound
G01-GEA090HI	Male	chr2	12716754	ATGGCAGCGGCGCGGGGAGCCGCCCGAGGAC	A	CTCF CTCF-Cohesin	4.2372	+	EH38E1974494	chr2	12716678	12717028	PLS,CTCF-bound
3B334	Female	chr17	62064989	G	C	CTCF CTCF-Cohesin	4.23466	+	EH38E1876577	chr17	62064930	62065279	PLS,CTCF-bound
G01-GEA030HI	Male	chr16	69613493	C	T	E4 Multi-tissue	4.23434	-	EH38E1824800	chr16	69613294	69613640	dELS
G01-GEA090HI	Male	chr17	44071239	A	G	E4 Multi-tissue	4.23413	-	EH38E1864852	chr17	44071007	44071357	pELS,CTCF-bound
G01-GEA335HI	Male	chr5	1174595	G	C	CTCF CTCF-Cohesin	4.23031	-	EH38E2352641	chr5	1174396	1174721	dELS,CTCF-bound
G01-GEA103HI	Male	chr10	104045662	A	G	CTCF CTCF-Cohesin	4.22169	-	EH38E1496501	chr10	104045522	104045784	dELS,CTCF-bound
G01-GEA045HI	Male	chr5	95858974	T	G	E12 Erythroblast-like	4.21818	-	EH38E2392656	chr5	95858902	95859252	dELS,CTCF-bound
3B479	Male	chr19	21835897	G	A	CTCF CTCF-Cohesin	4.21623	-	EH38E1946186	chr19	21835854	21836043	pELS,CTCF-bound
G01-GEA001HI	Male	chr1	179954091	CATT	C	CTCF CTCF-Cohesin	4.2142	-	EH38E1401724	chr1	179954015	179954233	pELS,CTCF-bound
G01-GEA334HI	Male	chr2	43221384	C	A	E4 Multi-tissue	4.2139	+	EH38E1992452	chr2	43221174	43221523	dELS
G01-GEA284HI	Male	chr1	24319306	C	A	CTCF CTCF-Cohesin	4.21323	-	EH38E1328583	chr1	24319282	24319521	PLS,CTCF-bound
G01-GEA327HI	Male	chr15	90265370	CCCTG	C	CTCF CTCF-Cohesin	4.21265	-	EH38E1787359	chr15	90265305	90265461	pELS,CTCF-bound
G01-GEA232HI	Male	chr19	42529450	C	A	CTCF CTCF-Cohesin	4.21037	-	EH38E1955710	chr19	42529264	42529614	pELS,CTCF-bound
4B699	Male	chr2	127087419	C	T	E4 Multi-tissue	4.20763	-	EH38E2031002	chr2	127087155	127087498	dELS,CTCF-bound
G01-GEA135HI	Male	chr3	184361737	G	C	CTCF CTCF-Cohesin	4.2042	+	EH38E2264372	chr3	184361585	184361931	PLS,CTCF-bound
G01-GEA193HI	Male	chr5	139652054	GC	G	CTCF CTCF-Cohesin	4.20402	-	EH38E2413630	chr5	139651927	139652242	dELS,CTCF-bound
G01-GEA173HI	Male	chr7	32943354	G	A	E4 Multi-tissue	4.20352	+	EH38E2546563	chr7	32943019	32943368	PLS,CTCF-bound
G01-GEA001HI	Male	chr15	41660692	C	T	CTCF CTCF-Cohesin	4.19874	-	EH38E1756764	chr15	41660594	41660774	pELS,CTCF-bound
G01-GEA219HI	Male	chr12	107027714	T	C	E4 Multi-tissue	4.19863	-	EH38E1641406	chr12	107027607	107027929	dELS,CTCF-bound
G01-GEA289HI	Female	chr4	10123976	TGG	T	E11 T-cell	4.1979	-	EH38E2280787	chr4	10123875	10124066	dELS,CTCF-bound
G01-GEA003HI	Male	chr6	156953558	ACT	A	TF3 FOXA1 / AR / ESR1	4.19758	+	EH38E2518436	chr6	156953534	156953861	dELS,CTCF-bound
G01-GEA139HI	Male	chr19	37251917	C	A	E4 Multi-tissue	4.19752	+	EH38E1951798	chr19	37251679	37252029	PLS,CTCF-bound
G01-GEA139HI	Male	chr1	94237108	G	A	CTCF CTCF-Cohesin	4.19501	-	EH38E1368847	chr1	94236963	94237260	pELS,CTCF-bound
3E473	Male	chr1	151988672	C	A	E12 Erythroblast-like	4.19258	-	EH38E1384779	chr1	151988437	151988783	dELS
G01-GEA149HI	Male	chr2	177213193	A	G	CTCF CTCF-Cohesin	4.19256	-	EH38E2054842	chr2	177213095	177213445	pELS,CTCF-bound
G01-GEA003HI	Male	chr12	124369829	G	T	E4 Multi-tissue	4.19031	-	EH38E1653165	chr12	124369818	124369987	dELS,CTCF-bound
4B693	Male	chr20	49484423	GACGCGCGTGGCCGTGCATCCCTCTCC	G	CTCF CTCF-Cohesin	4.18659	+	EH38E2118710	chr20	49484145	49484495	PLS,CTCF-bound
3D632	Male	chr7	102153039	C	T	E4 Multi-tissue	4.18522	-	EH38E2577043	chr7	102152836	102153178	pELS,CTCF-bound
G01-GEA043HI	Male	chr20	47318533	G	C	E4 Multi-tissue	4.18394	-	EH38E2116862	chr20	47318282	47318626	PLS,CTCF-bound
3E475	Male	chr8	140634201	A	C	CTCF CTCF-Cohesin	4.18329	+	EH38E2673102	chr8	140633984	140634276	pELS,CTCF-bound
G01-GEA240HI	Female	chr14	104682033	T	C	E4 Multi-tissue	4.18315	+	EH38E1746018	chr14	104681743	104682090	pELS,CTCF-bound
G01-GEA173HI	Male	chr6	107489907	TGCGAGCAGCCCCCGGAG	T	CTCF CTCF-Cohesin	4.17916	+	EH38E2491433	chr6	107489817	107490165	PLS,CTCF-bound
G01-GEA214HI	Male	chr3	187101924	G	C	E4 Multi-tissue	4.17806	-	EH38E2266416	chr3	187101916	187102244	dELS,CTCF-bound
3D632	Male	chr10	73887926	GC	G	E4 Multi-tissue	4.17639	-	EH38E1478578	chr10	73887711	73888055	dELS,CTCF-bound
G01-GEA050HI	Male	chr10	79380445	G	C	TF3 FOXA1 / AR / ESR1	4.17356	-	EH38E1482749	chr10	79380296	79380535	pELS,CTCF-bound
G01-GEA185HI	Female	chr10	122162916	TA	T	CTCF CTCF-Cohesin	4.17322	+	EH38E1506182	chr10	122162655	122162962	pELS,CTCF-bound
G01-GEA135HI	Male	chr17	32943725	G	A	E4 Multi-tissue	4.17277	-	EH38E1857139	chr17	32943703	32944053	dELS,CTCF-bound
G01-GEA283HI	Male	chr3	129053841	C	T	CTCF CTCF-Cohesin	4.1724	-	EH38E2237019	chr3	129053726	129053981	dELS,CTCF-bound
G01-GEA195HI	Male	chr8	100720817	C	T	CTCF CTCF-Cohesin	4.17197	+	EH38E2652211	chr8	100720664	100720913	pELS,CTCF-bound
G01-GEA110HI	Female	chr20	53622033	G	A	E12 Erythroblast-like	4.17138	-	EH38E2122176	chr20	53621977	53622151	dELS,CTCF-bound
G01-GEA249HI	Male	chr5	168302074	G	C	E4 Multi-tissue	4.17102	+	EH38E2429179	chr5	168301840	168302185	dELS,CTCF-bound
3C573	Male	chr5	172697686	G	A	CTCF CTCF-Cohesin	4.16728	-	EH38E2432225	chr5	172697462	172697812	PLS,CTCF-bound
G01-GEA224HI	Female	chr2	55618926	A	G	CTCF CTCF-Cohesin	4.1618	-	EH38E1999538	chr2	55618601	55618934	pELS,CTCF-bound
G01-GEA120HI	Male	chr13	45851845	TAACA	T	E4 Multi-tissue	4.15984	-	EH38E1673700	chr13	45851659	45852007	PLS
G01-GEA045HI	Male	chr11	10305014	G	A	CTCF CTCF-Cohesin	4.15667	-	EH38E1519822	chr11	10304827	10305113	PLS,CTCF-bound
3E480	Male	chr16	4538569	C	CGGGCGG	E4 Multi-tissue	4.15487	-	EH38E1798499	chr16	4538386	4538638	PLS,CTCF-bound
G01-GEA140HI	Male	chr7	149839000	G	A	CTCF CTCF-Cohesin	4.15312	-	EH38E2600307	chr7	149838854	149839058	pELS,CTCF-bound
G01-GEA249HI	Male	chr20	35171982	A	G	E12 Erythroblast-like	4.1531	+	EH38E2108977	chr20	35171739	35172084	PLS,CTCF-bound
4B713	Male	chr4	182448858	G	A	CTCF CTCF-Cohesin	4.14899	+	EH38E2347610	chr4	182448774	182449123	dELS,CTCF-bound
4B691	Female	chr10	26697971	C	T	CTCF CTCF-Cohesin	4.14857	+	EH38E1456696	chr10	26697767	26697996	pELS,CTCF-bound
3D633	Male	chr2	118222171	T	TCTAAC	CTCF CTCF-Cohesin	4.14734	-	EH38E2027259	chr2	118222081	118222302	dELS,CTCF-bound
4B693	Male	chr16	31105808	C	T	CTCF CTCF-Cohesin	4.14536	-	EH38E1812004	chr16	31105681	31106011	pELS,CTCF-bound
G01-GEA217HI	Male	chr9	34376949	C	T	P Promoter	4.14341	-	EH38E2691113	chr9	34376874	34377223	PLS,CTCF-bound
4B710	Male	chr6	24720887	GTCACCCGCCTC	G	E4 Multi-tissue	4.14319	-	EH38E2454665	chr6	24720772	24721072	PLS,CTCF-bound
G01-GEA208HI	Male	chr1	28670017	C	T	E4 Multi-tissue	4.14149	-	EH38E1332476	chr1	28669902	28670124	pELS,CTCF-bound
4C200	Female	chr12	121799518	G	C	CTCF CTCF-Cohesin	4.1408	+	EH38E1651062	chr12	121799485	121799807	pELS,CTCF-bound
3B568	Male	chr17	6652106	G	T	CTCF CTCF-Cohesin	4.13926	+	EH38E1843750	chr17	6652093	6652436	pELS,CTCF-bound
G01-GEA026HI	Male	chr18	9017208	C	A	CTCF CTCF-Cohesin	4.13642	-	EH38E1898867	chr18	9017141	9017490	dELS,CTCF-bound
3C546	Male	chr1	155130018	A	C	TF3 FOXA1 / AR / ESR1	4.13603	-	EH38E1386881	chr1	155129824	155130167	dELS
G01-GEA111HI	Male	chr7	100483858	C	T	CTCF CTCF-Cohesin	4.13412	-	EH38E2575645	chr7	100483737	100484000	PLS,CTCF-bound
3A550	Male	chr13	100674744	C	A	CTCF CTCF-Cohesin	4.13348	+	EH38E1693540	chr13	100674644	100674800	PLS,CTCF-bound
G01-GEA176HI	Male	chr10	63767722	C	T	CTCF CTCF-Cohesin	4.13311	-	EH38E1473205	chr10	63767584	63767770	dELS,CTCF-bound
G01-GEA193HI	Male	chr2	8678067	C	T	CTCF CTCF-Cohesin	4.12872	+	EH38E1971133	chr2	8677952	8678153	pELS,CTCF-bound
G01-GEA226HI	Female	chr11	9137939	G	A	CTCF CTCF-Cohesin	4.12435	-	EH38E1518975	chr11	9137765	9138111	dELS,CTCF-bound
3C545	Male	chr12	1594964	C	CG	CTCF CTCF-Cohesin	4.12339	-	EH38E1586295	chr12	1594719	1595069	pELS,CTCF-bound
G01-GEA264HI	Male	chr11	78188105	C	A	CTCF CTCF-Cohesin	4.12232	+	EH38E1555153	chr11	78188075	78188424	pELS,CTCF-bound
G01-GEA167HI	Male	chr3	170038080	CGCGGGGCGGG	C	CTCF CTCF-Cohesin	4.11983	+	EH38E2256580	chr3	170037856	170038204	PLS,CTCF-bound
3C567	Male	chr16	85652633	G	A	E4 Multi-tissue	4.11777	-	EH38E1834645	chr16	85652475	85652789	dELS,CTCF-bound
G01-GEA264HI	Male	chr17	60941212	C	G	E4 Multi-tissue	4.11539	-	EH38E1875730	chr17	60941046	60941395	dELS
G01-GEA027HI	Male	chr5	43556874	G	A	CTCF CTCF-Cohesin	4.11173	-	EH38E2369705	chr5	43556772	43557070	PLS,CTCF-bound
3C565	Male	chr2	38528332	T	A	CTCF CTCF-Cohesin	4.10651	-	EH38E1989216	chr2	38528038	38528383	dELS,CTCF-bound
3B568	Male	chr8	11765621	T	C	CTCF CTCF-Cohesin	4.10498	-	EH38E2611110	chr8	11765358	11765707	dELS,CTCF-bound
3C567	Male	chr12	124568573	ACCTGGCCCC	A	CTCF CTCF-Cohesin	4.10345	+	EH38E1653451	chr12	124568564	124568904	dELS,CTCF-bound
G01-GEA154HI	Male	chr19	52786883	A	C	CTCF CTCF-Cohesin	4.10343	+	EH38E1963198	chr19	52786653	52787001	PLS,CTCF-bound
G01-GEA027HI	Male	chr3	3126561	G	A	TF5 AR	4.10161	-	EH38E2174312	chr3	3126542	3126725	pELS,CTCF-bound
3C575	Male	chr20	32560989	G	C	CTCF CTCF-Cohesin	4.10149	+	EH38E2107108	chr20	32560932	32561186	PLS,CTCF-bound
G01-GEA185HI	Female	chr20	10672060	G	C	E4 Multi-tissue	4.10126	+	EH38E2097637	chr20	10672045	10672212	pELS,CTCF-bound
3C562	Male	chr8	129826358	C	T	CTCF CTCF-Cohesin	4.09696	-	EH38E2667927	chr8	129826222	129826559	dELS,CTCF-bound
4B691	Female	chr22	23521874	C	T	CTCF CTCF-Cohesin	4.09542	+	EH38E2152717	chr22	23521765	23522115	dELS,CTCF-bound
2F730	Male	chr3	183162913	C	A	E4 Multi-tissue	4.09507	+	EH38E2263466	chr3	183162615	183162965	PLS,CTCF-bound
4B858	Male	chr16	75555936	C	G	CTCF CTCF-Cohesin	4.09467	-	EH38E1828327	chr16	75555813	75556081	pELS,CTCF-bound
G01-GEA050HI	Male	chr12	57006625	G	GA	CTCF CTCF-Cohesin	4.09379	-	EH38E1616112	chr12	57006418	57006757	PLS,CTCF-bound
G01-GEA176HI	Male	chr5	142699197	A	T	TF3 FOXA1 / AR / ESR1	4.09212	+	EH38E2415887	chr5	142699168	142699358	pELS,CTCF-bound
G01-GEA336HI	Male	chr1	54715856	G	A	CTCF CTCF-Cohesin	4.09188	-	EH38E1349200	chr1	54715619	54715969	PLS,CTCF-bound
4B699	Male	chr15	65185516	G	C	E5 B-cell-like	4.08935	-	EH38E1770517	chr15	65185317	65185667	PLS,CTCF-bound
G01-GEA136HI	Male	chr22	29202948	G	A	P Promoter	4.08874	-	EH38E2156807	chr22	29202813	29203163	dELS,CTCF-bound
G01-GEA248HI	Male	chrX	110003008	C	T	CTCF CTCF-Cohesin	4.08748	-	EH38E2764001	chrX	110002835	110003183	PLS,CTCF-bound
G01-GEA070HI	Male	chr18	12657094	GC	G	E4 Multi-tissue	4.08321	+	EH38E1901303	chr18	12657060	12657345	pELS,CTCF-bound
G01-GEA103HI	Male	chr8	32928032	C	T	CTCF CTCF-Cohesin	4.0827	-	EH38E2623098	chr8	32927763	32928111	dELS,CTCF-bound
G01-GEA232HI	Male	chr1	214280550	T	C	CTCF CTCF-Cohesin	4.0797	+	EH38E1421246	chr1	214280433	214280631	pELS,CTCF-bound
G01-GEA101HI	Male	chr17	15945077	C	CG	CTCF CTCF-Cohesin	4.07936	+	EH38E1849053	chr17	15944968	15945313	pELS,CTCF-bound
5G257	Male	chr9	4298126	G	C	E4 Multi-tissue	4.07933	+	EH38E2679076	chr9	4297853	4298190	pELS,CTCF-bound
G01-GEA301HI	Male	chr12	104958330	CGCCCCGCCCCCGCGCGGCA	C	CTCF CTCF-Cohesin	4.07922	-	EH38E1639901	chr12	104958143	104958492	dELS,CTCF-bound
G01-GEA285HI	Male	chr3	57227792	A	AGGGCGGGCCGGGGTCAGCTGCGGC	CTCF CTCF-Cohesin	4.07852	-	EH38E2205468	chr3	57227524	57227874	PLS,CTCF-bound
G01-GEA190HI	Male	chr6	105994362	T	C	TF2 CEBPB	4.07769	-	EH38E2490373	chr6	105994208	105994557	dELS,CTCF-bound
G01-GEA129HI	Male	chr1	201019444	G	GCAAT	E4 Multi-tissue	4.0762	+	EH38E1411278	chr1	201019418	201019768	dELS,CTCF-bound
G01-GEA235HI	Male	chr11	73334741	C	T	E12 Erythroblast-like	4.07039	-	EH38E1551646	chr11	73334551	73334898	dELS,CTCF-bound
2F867	Male	chr12	64609105	C	T	E4 Multi-tissue	4.06883	-	EH38E1619710	chr12	64608922	64609270	pELS,CTCF-bound
G01-GEA090HI	Male	chr10	94630209	T	A	CTCF CTCF-Cohesin	4.06797	-	EH38E1490087	chr10	94630127	94630340	CTCF-only,CTCF-bound
G01-GEA152HI	Male	chr11	75583412	G	GAGCCCGA	P Promoter	4.06676	-	EH38E1553300	chr11	75583192	75583536	PLS,CTCF-bound
G01-GEA207HI	Male	chr1	224929635	C	G	CTCF CTCF-Cohesin	4.06607	-	EH38E1426801	chr1	224929510	224929859	PLS,CTCF-bound
G01-GEA147HI	Male	chr17	42680021	G	GC	CTCF CTCF-Cohesin	4.06397	+	EH38E1863789	chr17	42679730	42680077	PLS,CTCF-bound
3B571	Female	chr10	122504748	G	A	E4 Multi-tissue	4.06265	+	EH38E1506507	chr10	122504602	122504945	dELS,CTCF-bound
G01-GEA154HI	Male	chr10	46023137	T	C	E4 Multi-tissue	4.0626	-	EH38E1465367	chr10	46023092	46023287	pELS,CTCF-bound
G01-GEA263HI	Female	chr19	12779455	C	G	E4 Multi-tissue	4.06235	-	EH38E1939915	chr19	12779168	12779509	pELS,CTCF-bound
2J788	Male	chr4	6909181	A	G	CTCF CTCF-Cohesin	4.06192	-	EH38E2278634	chr4	6909068	6909320	pELS,CTCF-bound
G01-GEA158HI	Male	chr9	15553424	C	T	CTCF CTCF-Cohesin	4.06172	-	EH38E2683905	chr9	15553240	15553521	pELS,CTCF-bound
G01-GEA110HI	Female	chr1	8084096	C	G	TF3 FOXA1 / AR / ESR1	4.0595	-	EH38E1315732	chr1	8083886	8084232	dELS
3C142	Female	chr1	73593627	G	A	TF3 FOXA1 / AR / ESR1	4.05937	-	EH38E1359124	chr1	73593407	73593754	dELS
G01-GEA003HI	Male	chr5	176361780	AGC	A	CTCF CTCF-Cohesin	4.05717	-	EH38E2434732	chr5	176361715	176362065	PLS,CTCF-bound
G01-GEA207HI	Male	chr3	196186867	G	A	E6 Weak epithelial	4.05706	+	EH38E2272497	chr3	196186789	196187124	dELS,CTCF-bound
G01-GEA173HI	Male	chr11	62542833	G	C	CTCF CTCF-Cohesin	4.04945	-	EH38E1542636	chr11	62542817	62543164	dELS,CTCF-bound
G01-GEA258HI	Female	chr16	68079806	C	G	TF3 FOXA1 / AR / ESR1	4.04841	+	EH38E1823547	chr16	68079645	68079995	dELS,CTCF-bound
G01-GEA012HI	Female	chr17	29177088	T	C	E12 Erythroblast-like	4.04769	+	EH38E1854687	chr17	29177019	29177213	pELS,CTCF-bound
G01-GEA278HI	Male	chr15	89411583	C	T	PC4 Polycomb / Bivalent stem cell Enh	4.04742	-	EH38E1786682	chr15	89411485	89411833	dELS,CTCF-bound
3B336	Male	chr20	35741602	G	C	CTCF CTCF-Cohesin	4.04653	-	EH38E2109407	chr20	35741469	35741817	pELS,CTCF-bound
G01-GEA193HI	Male	chr22	23070222	A	AGGTGCCCGGCGCGT	CTCF CTCF-Cohesin	4.04633	-	EH38E2152284	chr22	23070002	23070351	PLS,CTCF-bound
G01-GEA337HI	Male	chr5	178232828	TCGCCCCGCAGGCCC	T	P Promoter	4.04578	-	EH38E2436050	chr5	178232563	178232869	PLS,CTCF-bound
3D317	Female	chr22	24521922	A	G	CTCF CTCF-Cohesin	4.04506	-	EH38E2153598	chr22	24521746	24522056	dELS,CTCF-bound
G01-GEA232HI	Male	chr8	94553659	G	C	E5 B-cell-like	4.04487	+	EH38E2648521	chr8	94553429	94553779	PLS,CTCF-bound
3C559	Male	chr14	102591756	C	T	E4 Multi-tissue	4.04127	+	EH38E1744154	chr14	102591456	102591789	pELS,CTCF-bound
G01-GEA207HI	Male	chr6	139292149	G	A	CTCF CTCF-Cohesin	4.04108	-	EH38E2508587	chr6	139291817	139292167	PLS,CTCF-bound
3D612	Male	chr15	85528105	G	C	E4 Multi-tissue	4.03967	-	EH38E1784598	chr15	85527922	85528271	dELS
3D628	Male	chr18	57771383	G	A	E4 Multi-tissue	4.03787	-	EH38E1919633	chr18	57771293	57771597	dELS
G01-GEA279HI	Female	chr4	123418645	A	G	E4 Multi-tissue	4.03712	-	EH38E2324925	chr4	123418479	123418823	dELS
G01-GEA204HI	Male	chr19	13056219	C	G	E6 Weak epithelial	4.03612	-	EH38E1940257	chr19	13056000	13056346	dELS,CTCF-bound
G01-GEA307HI	Female	chr20	46558587	C	A	E4 Multi-tissue	4.03564	-	EH38E2116291	chr20	46558446	46558792	dELS
G01-GEA182HI	Male	chr6	151389682	G	A	E4 Multi-tissue	4.03229	-	EH38E2515656	chr6	151389486	151389834	pELS,CTCF-bound
G01-GEA220HI	Male	chr16	90019714	T	G	CTCF CTCF-Cohesin	4.03011	+	EH38E1838734	chr16	90019693	90020026	pELS,CTCF-bound
G01-GEA269HI	Male	chr8	1695919	GCTC	G	CTCF CTCF-Cohesin	4.02991	+	EH38E2606444	chr8	1695843	1696044	dELS,CTCF-bound
2F730	Male	chr21	42228253	G	A	CTCF CTCF-Cohesin	4.02863	-	EH38E2144454	chr21	42228121	42228421	dELS,CTCF-bound
G01-GEA301HI	Male	chr19	44141825	G	C	CTCF CTCF-Cohesin	4.0251	+	EH38E1956554	chr19	44141779	44141953	pELS,CTCF-bound
4B713	Male	chr3	126084196	C	T	P Promoter	4.02488	-	EH38E2234739	chr3	126084057	126084407	PLS,CTCF-bound
4B716	Male	chr6	3247855	T	G	E4 Multi-tissue	4.02394	-	EH38E2440522	chr6	3247763	3248113	dELS,CTCF-bound
3E473	Male	chr4	112523969	T	A	E4 Multi-tissue	4.02111	+	EH38E2320743	chr4	112523809	112524151	dELS,CTCF-bound
2F867	Male	chr12	102917551	G	C	CTCF CTCF-Cohesin	4.01442	+	EH38E1638547	chr12	102917536	102917713	PLS,CTCF-bound
G01-GEA180HI	Male	chr1	47918661	C	G	E12 Erythroblast-like	4.01436	-	EH38E1345615	chr1	47918551	47918859	dELS
G01-GEA104HI	Male	chr1	229229650	C	T	E7 Monocyte / Macrophage	4.01412	+	EH38E1429819	chr1	229229523	229229798	dELS,CTCF-bound
2F867	Male	chr17	48543416	CGCCGCCCGCGAGGCGGAGGG	C	CTCF CTCF-Cohesin	4.01342	+	EH38E1868068	chr17	48543395	48543745	PLS,CTCF-bound
G01-GEA269HI	Male	chr3	42654999	G	A	CTCF CTCF-Cohesin	4.01229	+	EH38E2195524	chr3	42654733	42655080	pELS,CTCF-bound
G01-GEA209HI	Male	chr5	10988106	C	T	CTCF CTCF-Cohesin	4.01072	+	EH38E2357151	chr5	10987904	10988237	dELS,CTCF-bound
G01-GEA232HI	Male	chr4	139666294	C	T	E4 Multi-tissue	4.01047	-	EH38E2330042	chr4	139666185	139666349	pELS,CTCF-bound
G01-GEA065HI	Male	chr2	9422627	G	A	CTCF CTCF-Cohesin	4.00845	-	EH38E1971763	chr2	9422510	9422806	pELS,CTCF-bound
3A551	Female	chr19	1021778	C	T	CTCF CTCF-Cohesin	4.00774	-	EH38E1930701	chr19	1021540	1021890	PLS,CTCF-bound
3E467	Female	chr12	102965107	C	A	E4 Multi-tissue	4.00757	+	EH38E1638575	chr12	102964908	102965257	dELS
G01-GEA027HI	Male	chr12	89375652	G	A	E12 Erythroblast-like	4.00398	-	EH38E1630825	chr12	89375652	89375891	dELS
3C560	Male	chr9	111484238	T	TGGGCCGAGCGGGCCC	CTCF CTCF-Cohesin	4.00198	-	EH38E2718115	chr9	111484221	111484511	PLS,CTCF-bound
G01-GEA065HI	Male	chr18	54880917	C	T	E4 Multi-tissue	4.00121	-	EH38E1918022	chr18	54880811	54881055	pELS,CTCF-bound
4B858	Male	chr11	3153497	G	C	E4 Multi-tissue	4.00015	+	EH38E1516091	chr11	3153492	3153814	dELS,CTCF-bound
G01-GEA306HI	Male	chr20	16580213	G	C	TF3 FOXA1 / AR / ESR1	3.99922	-	EH38E2100322	chr20	16580193	16580543	pELS
4B696	Male	chr5	125411536	A	T	E4 Multi-tissue	3.99862	-	EH38E2405107	chr5	125411515	125411865	dELS
3C145	Female	chr2	219178294	C	T	CTCF CTCF-Cohesin	3.99744	+	EH38E2075942	chr2	219177994	219178343	PLS,CTCF-bound
G01-GEA132HI	Male	chr12	8033455	C	T	E12 Erythroblast-like	3.99266	+	EH38E1591112	chr12	8033322	8033649	PLS,CTCF-bound
G01-GEA114HI	Male	chr4	3013980	T	A	E5 B-cell-like	3.99134	-	EH38E2276093	chr4	3013909	3014177	dELS,CTCF-bound
3B374	Male	chr1	58785850	C	T	E4 Multi-tissue	3.98963	+	EH38E1351627	chr1	58785692	58786027	pELS
3C573	Male	chr2	46941035	CGCGGCGGGGGCG	C	CTCF CTCF-Cohesin	3.98761	+	EH38E1995405	chr2	46941006	46941356	PLS,CTCF-bound
2H163	Male	chr15	40368062	CGGCTGTGCGCGCCGGGCGCGG	C	CTCF CTCF-Cohesin	3.98154	+	EH38E1755875	chr15	40368030	40368379	pELS,CTCF-bound
G01-GEA219HI	Male	chr5	55161113	C	G	E12 Erythroblast-like	3.98154	-	EH38E2372533	chr5	55160889	55161226	pELS,CTCF-bound
3C139	Male	chr5	76522758	T	G	E9 Liver / Intestine	3.98094	-	EH38E2383790	chr5	76522592	76522808	dELS,CTCF-bound
G01-GEA003HI	Male	chr16	87723508	G	A	TF5 AR	3.97435	+	EH38E1836380	chr16	87723237	87723587	dELS
2H163	Male	chr17	57256090	C	T	CTCF CTCF-Cohesin	3.97418	+	EH38E1872950	chr17	57256047	57256214	pELS,CTCF-bound
G01-GEA251HI	Male	chr16	66830498	T	C	CTCF CTCF-Cohesin	3.97339	-	EH38E1822387	chr16	66830393	66830630	pELS,CTCF-bound
G01-GEA053HI	Female	chr1	115139070	C	T	CTCF CTCF-Cohesin	3.97163	-	EH38E1378568	chr1	115138958	115139289	dELS,CTCF-bound
G01-GEA219HI	Male	chr19	41957927	G	C	CTCF CTCF-Cohesin	3.96993	-	EH38E1955182	chr19	41957768	41958112	pELS,CTCF-bound
3D632	Male	chr1	26110995	CG	C	CTCF CTCF-Cohesin	3.96992	-	EH38E1330228	chr1	26110964	26111277	PLS,CTCF-bound
G01-GEA124HI	Male	chr7	4974249	CGGGGGT	C	CTCF CTCF-Cohesin	3.96974	+	EH38E2531233	chr7	4974205	4974386	pELS,CTCF-bound
G01-GEA218HI	Male	chr15	81480748	C	G	CTCF CTCF-Cohesin	3.96385	-	EH38E1782549	chr15	81480611	81480947	DNase-H3K4me3,CTCF-bound
G01-GEA295HI	Male	chr5	138353514	C	T	CTCF CTCF-Cohesin	3.96174	-	EH38E2412484	chr5	138353305	138353597	pELS,CTCF-bound
G01-GEA309HI	Male	chr8	118622327	TG	T	E4 Multi-tissue	3.96055	+	EH38E2660063	chr8	118622142	118622382	pELS
3C572	Male	chr17	60469938	T	C	TF3 FOXA1 / AR / ESR1	3.95868	-	EH38E1875489	chr17	60469787	60470130	dELS
G01-GEA074HI	Male	chr10	6212193	C	T	E4 Multi-tissue	3.95734	-	EH38E1445130	chr10	6211996	6212345	dELS,CTCF-bound
G01-GEA139HI	Male	chr3	39107084	T	A	E4 Multi-tissue	3.95623	+	EH38E2193540	chr3	39106964	39107269	pELS,CTCF-bound
G01-GEA065HI	Male	chr17	59847856	C	T	TF3 FOXA1 / AR / ESR1	3.95602	-	EH38E1875098	chr17	59847703	59848049	pELS,CTCF-bound
3B374	Male	chr1	64470083	C	A	P Promoter	3.9548	-	EH38E1355110	chr1	64469984	64470295	pELS,CTCF-bound
G01-GEA149HI	Male	chr13	51453642	A	AGCGGGCGCGG	CTCF CTCF-Cohesin	3.95256	-	EH38E1677236	chr13	51453428	51453692	PLS,CTCF-bound
G01-GEA252HI	Male	chr7	45089051	C	G	E4 Multi-tissue	3.95238	-	EH38E2553779	chr7	45088970	45089241	PLS,CTCF-bound
G01-GEA306HI	Male	chr4	76198789	T	C	E12 Erythroblast-like	3.95179	+	EH38E2304689	chr4	76198523	76198872	dELS
G01-GEA271HI	Male	chr8	23457656	A	ACCCCCGCCCGG	CTCF CTCF-Cohesin	3.94985	-	EH38E2617294	chr8	23457550	23457900	PLS,CTCF-bound
G01-GEA279HI	Female	chr11	130448522	T	C	CTCF CTCF-Cohesin	3.94939	+	EH38E1582520	chr11	130448374	130448721	pELS,CTCF-bound
G01-GEA206HI	Male	chr5	180802415	T	C	E4 Multi-tissue	3.94817	-	EH38E2437767	chr5	180802250	180802583	pELS,CTCF-bound
G01-GEA278HI	Male	chr13	33218288	G	A	E4 Multi-tissue	3.94327	-	EH38E1666361	chr13	33218003	33218352	dELS
G01-GEA139HI	Male	chr19	10741073	A	G	TF3 FOXA1 / AR / ESR1	3.94266	-	EH38E1938590	chr19	10740907	10741151	dELS
G01-GEA207HI	Male	chr11	783934	CCTT	C	CTCF CTCF-Cohesin	3.94243	+	EH38E1513945	chr11	783717	784066	dELS,CTCF-bound
G01-GEA287HI	Male	chr9	129597560	C	T	E4 Multi-tissue	3.9423	-	EH38E2730670	chr9	129597352	129597702	dELS,CTCF-bound
G01-GEA211HI	Male	chr14	24081079	T	G	E4 Multi-tissue	3.94112	+	EH38E1703560	chr14	24081006	24081356	pELS,CTCF-bound
2F867	Male	chr18	24014332	G	C	E4 Multi-tissue	3.93947	-	EH38E1904587	chr18	24014234	24014387	PLS,CTCF-bound
G01-GEA249HI	Male	chr11	10808574	G	A	CTCF CTCF-Cohesin	3.93946	-	EH38E1520346	chr11	10808558	10808752	PLS,CTCF-bound
G01-GEA224HI	Female	chr3	169863518	CTTGTGGCTTCCTGT	C	E11 T-cell	3.93901	-	EH38E2256453	chr3	169863438	169863787	DNase-H3K4me3,CTCF-bound
4B716	Male	chr6	3259848	TCCGGCTTTGCGTGTCG	T	CTCF CTCF-Cohesin	3.93677	-	EH38E2440536	chr6	3259731	3259930	pELS,CTCF-bound
G01-GEA173HI	Male	chr17	55420946	G	C	CTCF CTCF-Cohesin	3.93452	-	EH38E1871875	chr17	55420804	55421123	pELS,CTCF-bound
G01-GEA218HI	Male	chr6	26550638	C	T	CTCF CTCF-Cohesin	3.93236	-	EH38E2456242	chr6	26550447	26550776	dELS,CTCF-bound
G01-GEA193HI	Male	chr6	5132973	G	A	E4 Multi-tissue	3.93122	-	EH38E2442052	chr6	5132764	5133112	dELS,CTCF-bound
G01-GEA003HI	Male	chr22	41217983	T	C	CTCF CTCF-Cohesin	3.92892	+	EH38E2166134	chr22	41217647	41217993	PLS,CTCF-bound
G01-GEA289HI	Female	chr20	37095580	C	T	E4 Multi-tissue	3.92885	+	EH38E2110417	chr20	37095550	37095900	PLS,CTCF-bound
G01-GEA206HI	Male	chr3	32781146	C	A	E4 Multi-tissue	3.92794	+	EH38E2190351	chr3	32780822	32781159	dELS,CTCF-bound
3E475	Male	chr3	193241118	CGGCGGGCGGGCGGGCG	C	E12 Erythroblast-like	3.92742	+	EH38E2270074	chr3	193240987	193241332	PLS,CTCF-bound
5L790	Male	chr5	78505085	C	A	E4 Multi-tissue	3.92608	-	EH38E2384859	chr5	78504967	78505317	dELS,CTCF-bound
G01-GEA090HI	Male	chr11	77590001	G	C	CTCF CTCF-Cohesin	3.92484	+	EH38E1554829	chr11	77589703	77590037	pELS,CTCF-bound
G01-GEA136HI	Male	chr4	2485135	C	T	E12 Erythroblast-like	3.92272	+	EH38E2275628	chr4	2484996	2485340	dELS,CTCF-bound
G01-GEA269HI	Male	chr12	79935309	A	G	CTCF CTCF-Cohesin	3.92214	-	EH38E1627568	chr12	79935065	79935415	PLS,CTCF-bound
G01-GEA252HI	Male	chr2	66930191	G	A	E4 Multi-tissue	3.92094	-	EH38E2005590	chr2	66930061	66930405	dELS,CTCF-bound
G01-GEA269HI	Male	chr3	127738342	A	G	TF3 FOXA1 / AR / ESR1	3.92019	-	EH38E2235855	chr3	127738283	127738541	dELS
G01-GEA278HI	Male	chr17	41785243	G	A	E12 Erythroblast-like	3.91929	-	EH38E1862915	chr17	41785209	41785552	pELS
3E475	Male	chr16	4585647	C	A	CTCF CTCF-Cohesin	3.91779	-	EH38E1798516	chr16	4585415	4585765	CTCF-only,CTCF-bound
3B336	Male	chr17	8189832	T	G	CTCF CTCF-Cohesin	3.91746	-	EH38E1845087	chr17	8189738	8190018	pELS,CTCF-bound
G01-GEA143HI	Female	chr12	58925286	G	A	E12 Erythroblast-like	3.91744	-	EH38E1617560	chr12	58925156	58925502	dELS
G01-GEA334HI	Male	chr20	62482315	C	T	TF3 FOXA1 / AR / ESR1	3.91685	-	EH38E2128132	chr20	62482121	62482469	dELS
G01-GEA024HI	Female	chr1	156661497	C	T	P Promoter	3.91643	-	EH38E1388250	chr1	156661337	156661675	PLS,CTCF-bound
G01-GEA195HI	Male	chr4	92303777	CCTT	C	CTCF CTCF-Cohesin	3.91612	-	EH38E2312616	chr4	92303594	92303943	PLS,CTCF-bound
G01-GEA026HI	Male	chr12	110404118	C	A	CTCF CTCF-Cohesin	3.9161	+	EH38E1643830	chr12	110403931	110404228	pELS,CTCF-bound
G01-GEA287HI	Male	chr4	7939763	G	C	CTCF CTCF-Cohesin	3.91287	-	EH38E2279574	chr4	7939692	7940041	PLS,CTCF-bound
3C559	Male	chr2	54471580	A	T	E12 Erythroblast-like	3.9119	-	EH38E1998604	chr2	54471486	54471765	dELS
G01-GEA114HI	Male	chr4	98929796	G	A	CTCF CTCF-Cohesin	3.91171	+	EH38E2314823	chr4	98929708	98929866	pELS,CTCF-bound
G01-GEA279HI	Female	chr1	93681590	A	AGACTCACCTCCCGGCGCGGCGCT	E4 Multi-tissue	3.90997	+	EH38E1368339	chr1	93681357	93681666	PLS,CTCF-bound
G01-GEA310HI	Male	chr16	87461598	A	T	CTCF CTCF-Cohesin	3.90956	+	EH38E1836164	chr16	87461488	87461825	dELS,CTCF-bound
3B479	Male	chr12	122774752	A	T	P Promoter	3.90956	+	EH38E1651818	chr12	122774498	122774844	PLS,CTCF-bound
G01-GEA045HI	Male	chr1	55214606	C	A	CTCF CTCF-Cohesin	3.90809	+	EH38E1349595	chr1	55214530	55214877	pELS
3E465	Male	chr6	44058651	C	T	CTCF CTCF-Cohesin	3.906	-	EH38E2469162	chr6	44058507	44058854	dELS,CTCF-bound
G01-GEA096HI	Male	chr3	193826703	A	C	E4 Multi-tissue	3.90453	-	EH38E2270382	chr3	193826407	193826746	dELS,CTCF-bound
3B479	Male	chr5	112861546	C	G	CTCF CTCF-Cohesin	3.90342	+	EH38E2399387	chr5	112861414	112861576	PLS,CTCF-bound
3G089	Male	chr16	30527562	G	C	CTCF CTCF-Cohesin	3.90277	-	EH38E1811482	chr16	30527291	30527634	pELS,CTCF-bound
G01-GEA139HI	Male	chr10	97736961	T	C	E5 B-cell-like	3.90138	+	EH38E1492075	chr10	97736944	97737290	PLS,CTCF-bound
4B699	Male	chr5	132422893	C	T	CTCF CTCF-Cohesin	3.90044	+	EH38E2408500	chr5	132422670	132423019	dELS,CTCF-bound
G01-GEA313HI	Male	chr15	37110927	C	A	E12 Erythroblast-like	3.8986	+	EH38E1753760	chr15	37110833	37111181	pELS
G01-GEA114HI	Male	chr4	26239265	C	T	E4 Multi-tissue	3.89785	+	EH38E2287764	chr4	26239202	26239551	dELS,CTCF-bound
G01-GEA211HI	Male	chr16	89722251	C	G	CTCF CTCF-Cohesin	3.89755	-	EH38E1838478	chr16	89722022	89722372	pELS,CTCF-bound
3B571	Female	chr6	22146219	T	C	CTCF CTCF-Cohesin	3.89673	-	EH38E2453605	chr6	22146094	22146423	pELS,CTCF-bound
G01-GEA218HI	Male	chr5	62720239	TGA	T	E11 T-cell	3.89383	-	EH38E2377088	chr5	62720016	62720364	dELS,CTCF-bound
3D629	Male	chr22	23844612	G	A	L5 Low signal	3.89219	+	EH38E2153004	chr22	23844460	23844773	dELS,CTCF-bound
5F620	Male	chr3	42230134	C	T	CTCF CTCF-Cohesin	3.89036	-	EH38E2195256	chr3	42229925	42230193	dELS,CTCF-bound
G01-GEA041HI	Female	chr2	40451056	G	A	E4 Multi-tissue	3.88615	-	EH38E1990621	chr2	40450936	40451278	pELS,CTCF-bound
5L790	Male	chr2	218010467	AC	A	CTCF CTCF-Cohesin	3.8844	+	EH38E2075058	chr2	218010259	218010527	dELS,CTCF-bound
G01-GEA038HI	Male	chr5	76790880	C	T	E12 Erythroblast-like	3.88418	-	EH38E2384006	chr5	76790781	76791130	dELS
3C544	Female	chr2	218959438	G	T	E4 Multi-tissue	3.87989	+	EH38E2075755	chr2	218959438	218959785	PLS,CTCF-bound
3C560	Male	chr17	81967974	G	C	E4 Multi-tissue	3.87866	+	EH38E1892824	chr17	81967948	81968298	pELS,CTCF-bound
G01-GEA177HI	Male	chr12	67269643	TGGCGGC	T	CTCF CTCF-Cohesin	3.87713	+	EH38E1621432	chr12	67269449	67269667	pELS,CTCF-bound
4B693	Male	chrX	120630443	C	A	CTCF CTCF-Cohesin	3.87665	+	EH38E2766630	chrX	120630417	120630603	pELS,CTCF-bound
G01-GEA096HI	Male	chr1	205565975	G	A	TF3 FOXA1 / AR / ESR1	3.87614	-	EH38E1415551	chr1	205565817	205566159	pELS
3C562	Male	chr17	57995741	TCAC	T	CTCF CTCF-Cohesin	3.87481	-	EH38E1873810	chr17	57995449	57995776	pELS,CTCF-bound
G01-GEA184HI	Female	chr7	38631501	T	TGAGGGCGGGGC	P Promoter	3.87392	+	EH38E2549860	chr7	38631320	38631670	PLS,CTCF-bound
3B331	Male	chr8	37841384	G	A	CTCF CTCF-Cohesin	3.8731	+	EH38E2624973	chr8	37841311	37841636	dELS,CTCF-bound
G01-GEA249HI	Male	chr17	17838186	C	CGCAT	E12 Erythroblast-like	3.86678	-	EH38E1850591	chr17	17838157	17838457	pELS,CTCF-bound
G01-GEA219HI	Male	chr14	49635328	G	A	CTCF CTCF-Cohesin	3.86644	-	EH38E1712275	chr14	49635124	49635387	PLS,CTCF-bound
G01-GEA204HI	Male	chr11	60775669	C	T	CTCF CTCF-Cohesin	3.86605	-	EH38E1541030	chr11	60775392	60775742	dELS,CTCF-bound
G01-GEA220HI	Male	chr4	182917029	G	C	E4 Multi-tissue	3.86487	-	EH38E2347921	chr4	182916831	182917168	pELS,CTCF-bound
G01-GEA186HI	Female	chr7	73521651	C	A	CTCF CTCF-Cohesin	3.86289	+	EH38E2563077	chr7	73521624	73521916	pELS,CTCF-bound
3C544	Female	chr12	2813683	T	C	CTCF CTCF-Cohesin	3.85997	+	EH38E1587385	chr12	2813601	2813920	pELS,CTCF-bound
G01-GEA167HI	Male	chr3	197297709	G	A	CTCF CTCF-Cohesin	3.85977	+	EH38E2273257	chr3	197297517	197297806	pELS,CTCF-bound
3D317	Female	chr1	153535333	A	G	CTCF CTCF-Cohesin	3.85784	+	EH38E1385447	chr1	153535255	153535592	pELS,CTCF-bound
G01-GEA154HI	Male	chr1	25562544	G	C	CTCF CTCF-Cohesin	3.85689	+	EH38E1329629	chr1	25562517	25562865	dELS,CTCF-bound
G01-GEA182HI	Male	chr10	122374511	C	CCAGAGCTCCGCGCG	CTCF CTCF-Cohesin	3.8539	-	EH38E1506386	chr10	122374402	122374747	PLS,CTCF-bound
3D630	Male	chr10	128541647	G	GT	E4 Multi-tissue	3.85323	+	EH38E1510348	chr10	128541361	128541680	dELS,CTCF-bound
3E473	Male	chr7	82044697	T	A	CTCF CTCF-Cohesin	3.85036	-	EH38E2567600	chr7	82044598	82044826	dELS,CTCF-bound
3C546	Male	chr8	140597167	G	A	E5 B-cell-like	3.85006	-	EH38E2673058	chr8	140596883	140597233	dELS,CTCF-bound
3C142	Female	chr14	24392528	A	G	CTCF CTCF-Cohesin	3.84654	-	EH38E1703866	chr14	24392318	24392647	dELS,CTCF-bound
G01-GEA182HI	Male	chr17	2091253	G	A	E4 Multi-tissue	3.84401	-	EH38E1840643	chr17	2091142	2091473	pELS,CTCF-bound
G01-GEA337HI	Male	chr19	4759825	C	T	CTCF CTCF-Cohesin	3.84293	+	EH38E1934453	chr19	4759779	4760129	dELS,CTCF-bound
G01-GEA224HI	Female	chr17	49575773	G	T	CTCF CTCF-Cohesin	3.8408	+	EH38E1869051	chr17	49575597	49575946	PLS,CTCF-bound
5F620	Male	chr22	39014088	A	G	E12 Erythroblast-like	3.84028	-	EH38E2164246	chr22	39013987	39014334	PLS,CTCF-bound
G01-GEA041HI	Female	chr13	46554778	T	C	CTCF CTCF-Cohesin	3.84	-	EH38E1674183	chr13	46554536	46554853	pELS,CTCF-bound
G01-GEA152HI	Male	chr1	226680303	AAGCG	A	E12 Erythroblast-like	3.839	-	EH38E1427942	chr1	226680118	226680468	dELS,CTCF-bound
G01-GEA023HI	Male	chr1	230140609	C	T	E4 Multi-tissue	3.83403	-	EH38E1430432	chr1	230140519	230140670	dELS,CTCF-bound
G01-GEA334HI	Male	chr18	70381682	C	T	E12 Erythroblast-like	3.83385	-	EH38E1925483	chr18	70381560	70381908	dELS,CTCF-bound
G01-GEA269HI	Male	chr18	11994528	C	T	E4 Multi-tissue	3.82805	-	EH38E1900883	chr18	11994362	11994684	pELS,CTCF-bound
3C560	Male	chr2	225889511	C	A	CTCF CTCF-Cohesin	3.8244	-	EH38E2079702	chr2	225889463	225889812	dELS,CTCF-bound
G01-GEA185HI	Female	chr11	102110257	G	A	E5 B-cell-like	3.82402	+	EH38E1564854	chr11	102110173	102110522	PLS,CTCF-bound
G01-GEA284HI	Male	chr19	53538118	A	AG	CTCF CTCF-Cohesin	3.82242	-	EH38E1963551	chr19	53538011	53538354	PLS,CTCF-bound
G01-GEA186HI	Female	chr2	203811762	C	T	E12 Erythroblast-like	3.82073	-	EH38E2067530	chr2	203811621	203811971	dELS,CTCF-bound
G01-GEA264HI	Male	chr2	111659705	T	C	E7 Monocyte / Macrophage	3.81905	-	EH38E2024885	chr2	111659509	111659853	dELS,CTCF-bound
G01-GEA071HI	Female	chr1	15527148	C	G	E4 Multi-tissue	3.81862	+	EH38E1321626	chr1	15527022	15527177	pELS,CTCF-bound
G01-GEA003HI	Male	chr7	29091440	A	AAAGAGAGCACACAGTGCC	TF3 FOXA1 / AR / ESR1	3.81841	+	EH38E2544160	chr7	29091124	29091474	dELS
1D466	Female	chr17	74736586	A	T	CTCF CTCF-Cohesin	3.81725	+	EH38E1885167	chr17	74736471	74736637	PLS,CTCF-bound
G01-GEA105HI	Male	chr14	65070601	C	T	TF3 FOXA1 / AR / ESR1	3.81725	-	EH38E1721658	chr14	65070357	65070701	dELS,CTCF-bound
G01-GEA239HI	Male	chr14	72517268	A	C	E4 Multi-tissue	3.81711	+	EH38E1726478	chr14	72516995	72517345	pELS,CTCF-bound
G01-GEA185HI	Female	chr9	130446513	G	A	E12 Erythroblast-like	3.81641	-	EH38E2731506	chr9	130446420	130446757	pELS,CTCF-bound
G01-GEA209HI	Male	chr1	111592752	CCTAGCTTTGACAACAGCAACTGTG	C	CTCF CTCF-Cohesin	3.81635	-	EH38E1376467	chr1	111592674	111592849	dELS,CTCF-bound
G01-GEA139HI	Male	chr7	151060218	G	A	CTCF CTCF-Cohesin	3.81357	+	EH38E2601143	chr7	151060109	151060353	pELS,CTCF-bound
G01-GEA030HI	Male	chr1	151281418	T	TTTCCC	CTCF CTCF-Cohesin	3.81287	-	EH38E1384191	chr1	151281287	151281637	pELS,CTCF-bound
G01-GEA065HI	Male	chr17	43399030	G	T	CTCF CTCF-Cohesin	3.81019	+	EH38E1864287	chr17	43398759	43399107	PLS,CTCF-bound
G01-GEA163HI	Male	chr17	40113659	T	C	E12 Erythroblast-like	3.80996	+	EH38E1861468	chr17	40113608	40113929	pELS,CTCF-bound
3E480	Male	chr4	165378986	AGCT	A	CTCF CTCF-Cohesin	3.80953	-	EH38E2341617	chr4	165378834	165379180	PLS,CTCF-bound
G01-GEA283HI	Male	chrX	23504211	TAAGTTA	T	E4 Multi-tissue	3.80845	+	EH38E2746848	chrX	23504208	23504556	dELS,CTCF-bound
5F620	Male	chr15	82530965	C	T	CTCF CTCF-Cohesin	3.8083	-	EH38E1782961	chr15	82530672	82531022	dELS,CTCF-bound
3B374	Male	chr3	46998673	G	T	E4 Multi-tissue	3.80765	-	EH38E2198631	chr3	46998566	46998900	dELS,CTCF-bound
G01-GEA305HI	Male	chr11	64879079	G	C	CTCF CTCF-Cohesin	3.80763	+	EH38E1544549	chr11	64878997	64879149	pELS,CTCF-bound
G01-GEA335HI	Male	chr3	156826222	T	C	P Promoter	3.80474	-	EH38E2251671	chr3	156826101	156826443	PLS,CTCF-bound
G01-GEA026HI	Male	chr19	8321524	C	G	CTCF CTCF-Cohesin	3.80471	+	EH38E1937183	chr19	8321250	8321599	PLS,CTCF-bound
G01-GEA226HI	Female	chr2	26922854	G	A	CTCF CTCF-Cohesin	3.80398	-	EH38E1982370	chr2	26922680	26923002	dELS,CTCF-bound
3C546	Male	chr11	76963249	A	G	TF3 FOXA1 / AR / ESR1	3.80365	-	EH38E1554400	chr11	76962932	76963281	dELS
G01-GEA337HI	Male	chr5	179806392	CG	C	CTCF CTCF-Cohesin	3.8032	+	EH38E2437120	chr5	179806207	179806421	pELS,CTCF-bound
3B571	Female	chr17	50543159	C	A	E4 Multi-tissue	3.803	-	EH38E1870139	chr17	50542919	50543264	dELS,CTCF-bound
G01-GEA154HI	Male	chr2	32063920	C	T	CTCF CTCF-Cohesin	3.80283	+	EH38E1985810	chr2	32063816	32064033	PLS,CTCF-bound
G01-GEA211HI	Male	chr6	69796293	C	G	CTCF CTCF-Cohesin	3.8003	-	EH38E2477639	chr6	69796140	69796465	pELS,CTCF-bound
G01-GEA023HI	Male	chr1	180157922	T	A	E12 Erythroblast-like	3.79524	+	EH38E1401841	chr1	180157666	180157997	dELS
3E467	Female	chr10	80356721	C	T	P Promoter	3.79468	+	EH38E1483174	chr10	80356681	80357016	PLS,CTCF-bound
3B479	Male	chr15	78048066	T	G	E4 Multi-tissue	3.79422	-	EH38E1780216	chr15	78047902	78048249	dELS
G01-GEA309HI	Male	chr1	33338578	T	C	E12 Erythroblast-like	3.79199	+	EH38E1335873	chr1	33338424	33338747	pELS,CTCF-bound
G01-GEA192HI	Male	chr7	112162288	C	T	E12 Erythroblast-like	3.79186	-	EH38E2582123	chr7	112162156	112162505	dELS,CTCF-bound
G01-GEA310HI	Male	chr2	9638721	C	T	TF3 FOXA1 / AR / ESR1	3.79127	+	EH38E1971935	chr2	9638515	9638864	PLS
G01-GEA154HI	Male	chr4	68864605	C	T	E12 Erythroblast-like	3.79104	-	EH38E2301533	chr4	68864441	68864789	dELS
G01-GEA176HI	Male	chr19	55302118	C	T	E4 Multi-tissue	3.78977	+	EH38E1964713	chr19	55301787	55302136	pELS,CTCF-bound
3B336	Male	chr17	28812514	T	G	CTCF CTCF-Cohesin	3.78919	+	EH38E1854279	chr17	28812344	28812694	PLS,CTCF-bound
G01-GEA208HI	Male	chr15	28021809	G	A	CTCF CTCF-Cohesin	3.7881	-	EH38E1749486	chr15	28021694	28022044	dELS,CTCF-bound
G01-GEA288HI	Male	chr17	62779210	GGCCCCCTGGC	G	CTCF CTCF-Cohesin	3.78636	-	EH38E1876945	chr17	62778981	62779331	dELS,CTCF-bound
G01-GEA136HI	Male	chr8	100986180	G	A	E4 Multi-tissue	3.78611	-	EH38E2652417	chr8	100986073	100986352	dELS,CTCF-bound
G01-GEA043HI	Male	chr2	191311829	C	T	E4 Multi-tissue	3.78542	-	EH38E2061495	chr2	191311652	191311998	dELS
5G257	Male	chr6	157046053	TCAGA	T	CTCF CTCF-Cohesin	3.78517	-	EH38E2518519	chr6	157045911	157046089	dELS,CTCF-bound
G01-GEA305HI	Male	chr4	185470865	G	A	TF3 FOXA1 / AR / ESR1	3.78298	-	EH38E2349727	chr4	185470795	185471102	pELS,CTCF-bound
G01-GEA301HI	Male	chr11	46281709	C	A	E12 Erythroblast-like	3.78259	+	EH38E1537282	chr11	46281567	46281856	dELS
G01-GEA301HI	Male	chr7	100656497	A	G	E4 Multi-tissue	3.78059	-	EH38E2575809	chr7	100656302	100656650	PLS,CTCF-bound
G01-GEA289HI	Female	chr19	2478360	GTTAC	G	CTCF CTCF-Cohesin	3.78032	+	EH38E1932427	chr19	2478344	2478675	dELS,CTCF-bound
G01-GEA028HI	Male	chr1	234971259	C	T	E4 Multi-tissue	3.77777	-	EH38E1433928	chr1	234971235	234971430	dELS,CTCF-bound
G01-GEA262HI	Female	chr1	228838659	G	A	E12 Erythroblast-like	3.77758	-	EH38E1429424	chr1	228838474	228838795	dELS,CTCF-bound
G01-GEA195HI	Male	chr1	151612154	A	G	CTCF CTCF-Cohesin	3.7775	-	EH38E1384449	chr1	151611885	151612235	PLS,CTCF-bound
G01-GEA334HI	Male	chr20	63521236	A	T	CTCF CTCF-Cohesin	3.77715	-	EH38E2129350	chr20	63520983	63521309	pELS,CTCF-bound
3D616	Female	chr5	57499585	A	G	CTCF CTCF-Cohesin	3.77414	+	EH38E2374175	chr5	57499352	57499700	dELS,CTCF-bound
3C560	Male	chr1	68176303	G	T	E6 Weak epithelial	3.7715	+	EH38E1357532	chr1	68176001	68176341	dELS
G01-GEA235HI	Male	chr4	7804198	C	A	CTCF CTCF-Cohesin	3.77023	-	EH38E2279388	chr4	7804129	7804287	dELS,CTCF-bound
G01-GEA071HI	Female	chr16	15998737	G	A	E5 B-cell-like	3.76955	-	EH38E1804604	chr16	15998468	15998818	dELS
G01-GEA001HI	Male	chr16	89816777	C	T	CTCF CTCF-Cohesin	3.76841	-	EH38E1838534	chr16	89816578	89816925	PLS,CTCF-bound
G01-GEA032HI	Female	chr5	96688068	T	C	CTCF CTCF-Cohesin	3.76825	-	EH38E2393284	chr5	96687927	96688168	dELS,CTCF-bound
G01-GEA110HI	Female	chr14	30874474	G	GCTCCCGCGCTTC	CTCF CTCF-Cohesin	3.76644	+	EH38E1705921	chr14	30874276	30874625	PLS,CTCF-bound
G01-GEA283HI	Male	chr12	121894122	C	G	TF3 FOXA1 / AR / ESR1	3.76561	-	EH38E1651155	chr12	121894007	121894173	dELS
G01-GEA281HI	Male	chr1	244835563	T	C	CTCF CTCF-Cohesin	3.7642	+	EH38E1438692	chr1	244835493	244835712	PLS,CTCF-bound
3C562	Male	chr6	44247098	G	C	CTCF CTCF-Cohesin	3.76356	+	EH38E2469374	chr6	44246831	44247181	PLS,CTCF-bound
G01-GEA190HI	Male	chr16	11640366	G	A	E12 Erythroblast-like	3.76275	-	EH38E1802045	chr16	11640365	11640715	dELS,CTCF-bound
5L790	Male	chr2	226836430	G	T	P Promoter	3.76101	-	EH38E2080262	chr2	226836221	226836518	pELS,CTCF-bound
G01-GEA114HI	Male	chr1	24914387	G	A	E4 Multi-tissue	3.76056	+	EH38E1329096	chr1	24914302	24914650	dELS,CTCF-bound
G01-GEA173HI	Male	chr2	45650186	C	T	E4 Multi-tissue	3.76031	+	EH38E1994092	chr2	45650160	45650403	pELS,CTCF-bound
5L790	Male	chr4	26857535	C	T	CTCF CTCF-Cohesin	3.7593	+	EH38E2288156	chr4	26857412	26857762	dELS,CTCF-bound
G01-GEA167HI	Male	chr8	127852270	C	T	CTCF CTCF-Cohesin	3.75788	-	EH38E2666331	chr8	127852065	127852415	dELS,CTCF-bound
G01-GEA204HI	Male	chr6	17600697	C	G	E4 Multi-tissue	3.75696	+	EH38E2450894	chr6	17600685	17600980	pELS,CTCF-bound
3B335	Male	chr11	133948244	C	A	E4 Multi-tissue	3.75659	-	EH38E1584360	chr11	133948041	133948387	dELS
3C560	Male	chr10	72450067	C	T	TF3 FOXA1 / AR / ESR1	3.7562	-	EH38E1477766	chr10	72450030	72450368	dELS
2J788	Male	chr22	41940270	G	A	TF3 FOXA1 / AR / ESR1	3.75591	-	EH38E2166779	chr22	41940092	41940442	PLS,CTCF-bound
G01-GEA301HI	Male	chr7	129368076	G	A	E4 Multi-tissue	3.75252	-	EH38E2589578	chr7	129367858	129368203	PLS,CTCF-bound
G01-GEA015HI	Male	chr22	46008112	G	A	E4 Multi-tissue	3.75155	-	EH38E2170079	chr22	46007909	46008259	pELS,CTCF-bound
G01-GEA219HI	Male	chr9	120876620	T	C	E12 Erythroblast-like	3.74981	+	EH38E2723375	chr9	120876329	120876676	pELS,CTCF-bound
3C142	Female	chr20	3808254	A	G	E4 Multi-tissue	3.74912	-	EH38E2093763	chr20	3808083	3808430	PLS,CTCF-bound
G01-GEA192HI	Male	chr8	59117581	CTGCGACTCGGTCGCGTGG	C	PC4 Polycomb / Bivalent stem cell Enh	3.74763	-	EH38E2633984	chr8	59117482	59117718	pELS,CTCF-bound
G01-GEA143HI	Female	chr1	3175024	G	A	CTCF CTCF-Cohesin	3.74661	+	EH38E1312427	chr1	3174966	3175236	dELS,CTCF-bound
G01-GEA240HI	Female	chr11	2807454	C	A	E4 Multi-tissue	3.74633	-	EH38E1515734	chr11	2807267	2807594	dELS
G01-GEA059HI	Female	chr11	108115935	AAT	A	E4 Multi-tissue	3.74588	-	EH38E1567559	chr11	108115826	108116176	dELS,CTCF-bound
G01-GEA071HI	Female	chr20	17557088	A	C	TF3 FOXA1 / AR / ESR1	3.7442	-	EH38E2100708	chr20	17556849	17557197	pELS
G01-GEA283HI	Male	chr14	102540375	G	A	E4 Multi-tissue	3.74285	+	EH38E1744089	chr14	102540331	102540534	pELS
4B696	Male	chr5	151770894	G	C	CTCF CTCF-Cohesin	3.74275	-	EH38E2422136	chr5	151770641	151770989	pELS,CTCF-bound
3C559	Male	chr14	103334816	C	G	E6 Weak epithelial	3.74263	-	EH38E1744865	chr14	103334577	103334913	PLS,CTCF-bound
G01-GEA334HI	Male	chr5	112707499	C	G	CTCF CTCF-Cohesin	3.74235	+	EH38E2399301	chr5	112707291	112707641	dELS,CTCF-bound
G01-GEA211HI	Male	chr5	176619208	G	A	TF2 CEBPB	3.74163	+	EH38E2434965	chr5	176619155	176619505	dELS,CTCF-bound
G01-GEA191HI	Male	chr10	101298017	C	G	E4 Multi-tissue	3.74102	+	EH38E1494184	chr10	101297988	101298338	dELS,CTCF-bound
G01-GEA139HI	Male	chr10	63166823	G	GAGGGTGTTGTAACAGATA	E4 Multi-tissue	3.73992	+	EH38E1472753	chr10	63166811	63167160	dELS,CTCF-bound
2H163	Male	chr1	203572313	GA	G	CTCF CTCF-Cohesin	3.73923	-	EH38E1413717	chr1	203572108	203572456	dELS
G01-GEA167HI	Male	chr2	112121853	A	G	CTCF CTCF-Cohesin	3.73748	+	EH38E2025157	chr2	112121686	112122036	CTCF-only,CTCF-bound
G01-GEA269HI	Male	chr3	32045526	G	A	TF3 FOXA1 / AR / ESR1	3.73655	+	EH38E2189813	chr3	32045407	32045596	pELS,CTCF-bound
G01-GEA263HI	Female	chr4	112113224	C	A	E4 Multi-tissue	3.73624	-	EH38E2320493	chr4	112113065	112113408	dELS,CTCF-bound
G01-GEA191HI	Male	chr2	110157345	G	T	CTCF CTCF-Cohesin	3.73576	-	EH38E2024299	chr2	110157208	110157477	dELS,CTCF-bound
G01-GEA208HI	Male	chr16	57795566	A	G	CTCF CTCF-Cohesin	3.73572	+	EH38E1819202	chr16	57795421	57795768	dELS,CTCF-bound
3C145	Female	chr4	38079199	T	C	E4 Multi-tissue	3.73552	+	EH38E2290952	chr4	38079099	38079440	dELS
2F957	Male	chr1	207867039	A	C	TF3 FOXA1 / AR / ESR1	3.73439	+	EH38E1417294	chr1	207866809	207867055	dELS,CTCF-bound
5L790	Male	chr3	13485259	C	A	E5 B-cell-like	3.73115	+	EH38E2180123	chr3	13485092	13485442	dELS,CTCF-bound
G01-GEA278HI	Male	chr2	234494431	C	T	E4 Multi-tissue	3.73095	-	EH38E2085100	chr2	234494352	234494548	dELS,CTCF-bound
2J788	Male	chr9	108886139	G	A	CTCF CTCF-Cohesin	3.73011	-	EH38E2716333	chr9	108885855	108886205	dELS,CTCF-bound
3G089	Male	chr5	10331721	C	G	TF3 FOXA1 / AR / ESR1	3.72976	+	EH38E2356594	chr5	10331503	10331778	dELS
3C567	Male	chr6	109095489	A	G	E5 B-cell-like	3.72963	-	EH38E2492655	chr6	109095285	109095634	PLS,CTCF-bound
G01-GEA334HI	Male	chr18	31722565	C	G	CTCF CTCF-Cohesin	3.72841	-	EH38E1907684	chr18	31722421	31722725	pELS,CTCF-bound
3C139	Male	chr9	94694297	G	A	E12 Erythroblast-like	3.72766	+	EH38E2709017	chr9	94694224	94694574	dELS
3E465	Male	chr1	236531860	C	A	E4 Multi-tissue	3.72766	-	EH38E1435062	chr1	236531692	236532039	dELS,CTCF-bound
G01-GEA186HI	Female	chr11	19244302	C	A	E4 Multi-tissue	3.72691	-	EH38E1525614	chr11	19244114	19244450	dELS
G01-GEA209HI	Male	chr2	102505582	C	T	TF3 FOXA1 / AR / ESR1	3.72494	-	EH38E2020702	chr2	102505381	102505712	dELS
G01-GEA267HI	Male	chr14	24188449	G	C	E4 Multi-tissue	3.72338	+	EH38E1703666	chr14	24188258	24188569	pELS,CTCF-bound
G01-GEA154HI	Male	chr9	124771268	TCCGCGCCGCTCCGCGCCCCTCCGCG	T	CTCF CTCF-Cohesin	3.72329	+	EH38E2726337	chr9	124771252	124771499	PLS,CTCF-bound
G01-GEA143HI	Female	chr1	234863242	G	A	E12 Erythroblast-like	3.72329	+	EH38E1433785	chr1	234863028	234863374	dELS,CTCF-bound
G01-GEA220HI	Male	chr17	16381357	A	AG	CTCF CTCF-Cohesin	3.72135	-	EH38E1849347	chr17	16381293	16381457	PLS,CTCF-bound
3E473	Male	chr10	92291076	T	G	CTCF CTCF-Cohesin	3.72029	-	EH38E1488759	chr10	92290931	92291281	PLS,CTCF-bound
3B568	Male	chr13	77327039	G	GCCGCCACCACCGCTACCA	CTCF CTCF-Cohesin	3.72027	-	EH38E1684775	chr13	77327020	77327369	PLS,CTCF-bound
3C559	Male	chr15	41402607	TGAGGTTTTTG	T	P Promoter	3.7196	+	EH38E1756578	chr15	41402317	41402667	PLS,CTCF-bound
G01-GEA163HI	Male	chr13	43132430	G	A	CTCF CTCF-Cohesin	3.71789	-	EH38E1671833	chr13	43132342	43132590	dELS,CTCF-bound
G01-GEA193HI	Male	chr6	16320175	C	T	E12 Erythroblast-like	3.71653	-	EH38E2449896	chr6	16319948	16320293	dELS,CTCF-bound
G01-GEA050HI	Male	chr17	42761354	G	A	CTCF CTCF-Cohesin	3.7156	-	EH38E1863845	chr17	42761207	42761428	PLS,CTCF-bound
G01-GEA038HI	Male	chr19	10461222	CCTGGAAAGGGGATGGCCGGGCAGGAGGCGGGGCTGGGGGCGGGGCTGGCTGGG	C	CTCF CTCF-Cohesin	3.71538	+	EH38E1938333	chr19	10461219	10461548	dELS,CTCF-bound
G01-GEA158HI	Male	chr6	109455784	AGGGCGGGGGCGG	A	CTCF CTCF-Cohesin	3.71323	+	EH38E2492924	chr6	109455555	109455831	PLS,CTCF-bound
3C147	Male	chr3	171830120	C	T	CTCF CTCF-Cohesin	3.70739	-	EH38E2257870	chr3	171830006	171830201	dELS,CTCF-bound
G01-GEA001HI	Male	chr14	88551612	G	A	CTCF CTCF-Cohesin	3.70545	-	EH38E1734115	chr14	88551345	88551694	PLS,CTCF-bound
G01-GEA009HI	Male	chrX	109281700	C	T	E4 Multi-tissue	3.69719	-	EH38E2763736	chrX	109281523	109281866	dELS,CTCF-bound
3D628	Male	chr19	925078	GGAGT	G	E4 Multi-tissue	3.69714	-	EH38E1930566	chr19	925011	925197	pELS,CTCF-bound
G01-GEA307HI	Female	chr16	4944992	G	A	E12 Erythroblast-like	3.69668	-	EH38E1798853	chr16	4944775	4945122	dELS,CTCF-bound
G01-GEA176HI	Male	chr12	79691235	C	G	CTCF CTCF-Cohesin	3.6919	+	EH38E1627442	chr12	79690959	79691307	PLS,CTCF-bound
G01-GEA090HI	Male	chr19	14136968	C	A	CTCF CTCF-Cohesin	3.69123	-	EH38E1941086	chr19	14136712	14137062	PLS,CTCF-bound
G01-GEA193HI	Male	chr14	60657425	A	AAAC	CTCF CTCF-Cohesin	3.69038	-	EH38E1718926	chr14	60657132	60657482	pELS,CTCF-bound
G01-GEA206HI	Male	chr1	904700	GCCTCCGAACGTGGCCGCCGCCT	G	CTCF CTCF-Cohesin	3.69033	+	EH38E1310207	chr1	904594	904931	PLS,CTCF-bound
G01-GEA025HI	Male	chr4	177442456	C	G	E5 B-cell-like	3.69002	-	EH38E2346382	chr4	177442311	177442638	PLS,CTCF-bound
G01-GEA229HI	Male	chr5	168365894	A	G	E4 Multi-tissue	3.68323	-	EH38E2429255	chr5	168365659	168365982	dELS,CTCF-bound
G01-GEA269HI	Male	chr6	160520277	C	A	E5 B-cell-like	3.68177	-	EH38E2521381	chr6	160520257	160520410	dELS,CTCF-bound
G01-GEA163HI	Male	chr7	17651967	C	A	CTCF CTCF-Cohesin	3.68175	-	EH38E2537098	chr7	17651942	17652292	dELS,CTCF-bound
3D629	Male	chr6	44002974	T	C	E4 Multi-tissue	3.67998	-	EH38E2469088	chr6	44002699	44002986	dELS,CTCF-bound
G01-GEA288HI	Male	chr1	44674639	T	C	E5 B-cell-like	3.67707	-	EH38E1343553	chr1	44674387	44674737	PLS,CTCF-bound
G01-GEA103HI	Male	chr19	46373943	C	T	E4 Multi-tissue	3.67635	-	EH38E1958248	chr19	46373870	46374220	dELS,CTCF-bound
3C545	Male	chr6	56370339	C	T	E4 Multi-tissue	3.67413	+	EH38E2475193	chr6	56370087	56370434	dELS,CTCF-bound
G01-GEA289HI	Female	chr10	112565651	C	T	CTCF CTCF-Cohesin	3.67399	-	EH38E1500102	chr10	112565506	112565823	CTCF-only,CTCF-bound
3C565	Male	chr16	31042540	T	G	CTCF CTCF-Cohesin	3.67303	+	EH38E1811946	chr16	31042286	31042620	pELS,CTCF-bound
G01-GEA248HI	Male	chr1	218347446	G	C	CTCF CTCF-Cohesin	3.67261	-	EH38E1422977	chr1	218347307	218347653	pELS,CTCF-bound
G01-GEA024HI	Female	chr3	12999584	G	A	E12 Erythroblast-like	3.67216	-	EH38E2179704	chr3	12999414	12999763	dELS,CTCF-bound
G01-GEA335HI	Male	chr14	34981519	A	C	E4 Multi-tissue	3.67205	-	EH38E1708271	chr14	34981282	34981562	pELS,CTCF-bound
G01-GEA336HI	Male	chr9	127388508	A	G	E11 T-cell	3.67048	-	EH38E2728366	chr9	127388321	127388671	dELS,CTCF-bound
G01-GEA158HI	Male	chr1	76868254	A	T	CTCF CTCF-Cohesin	3.6691	+	EH38E1360241	chr1	76868208	76868558	pELS,CTCF-bound
3D317	Female	chr1	193355356	C	T	E12 Erythroblast-like	3.66652	-	EH38E1408043	chr1	193355203	193355534	dELS
G01-GEA191HI	Male	chr16	89833974	G	C	TF3 FOXA1 / AR / ESR1	3.66503	-	EH38E1838556	chr16	89833797	89834143	dELS,CTCF-bound
3B334	Female	chr10	88990673	G	A	E4 Multi-tissue	3.66463	+	EH38E1486826	chr10	88990452	88990801	PLS,CTCF-bound
G01-GEA143HI	Female	chr12	106108659	A	G	CTCF CTCF-Cohesin	3.66272	+	EH38E1640778	chr12	106108401	106108748	dELS,CTCF-bound
3C147	Male	chr7	120792285	C	G	E4 Multi-tissue	3.66235	+	EH38E2585731	chr7	120792073	120792377	dELS,CTCF-bound
3C145	Female	chr2	128733220	C	T	E4 Multi-tissue	3.66108	-	EH38E2032285	chr2	128733101	128733451	dELS
G01-GEA269HI	Male	chr10	103504450	C	A	E12 Erythroblast-like	3.65921	-	EH38E1495896	chr10	103504362	103504709	dELS
G01-GEA150HI	Male	chr3	113495189	A	G	CTCF CTCF-Cohesin	3.65912	+	EH38E2227947	chr3	113495129	113495331	CTCF-only,CTCF-bound
4B848	Male	chr20	47464458	T	C	CTCF CTCF-Cohesin	3.65785	-	EH38E2117052	chr20	47464412	47464761	dELS,CTCF-bound
4B693	Male	chr9	2570824	G	C	E12 Erythroblast-like	3.65763	+	EH38E2678095	chr9	2570675	2571020	dELS,CTCF-bound
2H163	Male	chr6	21885599	A	G	E4 Multi-tissue	3.65365	-	EH38E2453374	chr6	21885518	21885856	dELS
3C573	Male	chr3	39152896	C	A	CTCF CTCF-Cohesin	3.65279	-	EH38E2193608	chr3	39152651	39153001	pELS,CTCF-bound
4B702	Male	chr6	28383691	G	A	E12 Erythroblast-like	3.65181	-	EH38E2457211	chr6	28383377	28383715	dELS,CTCF-bound
3C554	Male	chr8	100986548	A	G	E4 Multi-tissue	3.65132	-	EH38E2652418	chr8	100986365	100986704	dELS
G01-GEA139HI	Male	chr16	67884909	G	T	E4 Multi-tissue	3.65096	+	EH38E1823356	chr16	67884657	67885005	PLS,CTCF-bound
G01-GEA139HI	Male	chr1	234970081	TG	T	E4 Multi-tissue	3.64954	+	EH38E1433925	chr1	234969972	234970321	dELS,CTCF-bound
2F867	Male	chr17	50362160	A	T	CTCF CTCF-Cohesin	3.64946	-	EH38E1869972	chr17	50361930	50362280	dELS,CTCF-bound
G01-GEA191HI	Male	chr9	93201795	A	G	TF3 FOXA1 / AR / ESR1	3.64906	-	EH38E2708162	chr9	93201586	93201933	dELS,CTCF-bound
G01-GEA147HI	Male	chr10	104301030	C	T	E4 Multi-tissue	3.64668	-	EH38E1496677	chr10	104300892	104301233	dELS,CTCF-bound
3E468	Female	chr16	9092605	GCGGGGCGGCCCCATTGTGCCCTGAGCCGGCCT	G	CTCF CTCF-Cohesin	3.64589	-	EH38E1800348	chr16	9092550	9092887	pELS,CTCF-bound
3C142	Female	chr7	105589666	G	C	CTCF CTCF-Cohesin	3.64544	-	EH38E2578704	chr7	105589364	105589712	dELS,CTCF-bound
3C573	Male	chr12	38138892	A	G	CTCF CTCF-Cohesin	3.64466	-	EH38E1604576	chr12	38138773	38139105	dELS,CTCF-bound
G01-GEA070HI	Male	chr2	42961572	A	T	E4 Multi-tissue	3.64404	-	EH38E1992098	chr2	42961452	42961802	dELS
3C544	Female	chr16	77213090	C	T	CTCF CTCF-Cohesin	3.64365	-	EH38E1828840	chr16	77212816	77213130	dELS,CTCF-bound
G01-GEA074HI	Male	chr6	12365432	C	T	CTCF CTCF-Cohesin	3.64252	-	EH38E2446699	chr6	12365376	12365689	dELS,CTCF-bound
G01-GEA030HI	Male	chr14	73058309	C	T	CTCF CTCF-Cohesin	3.6413	-	EH38E1726905	chr14	73058261	73058611	PLS,CTCF-bound
G01-GEA192HI	Male	chr11	83194736	AG	A	E4 Multi-tissue	3.64032	-	EH38E1557181	chr11	83194493	83194822	PLS,CTCF-bound
G01-GEA313HI	Male	chr12	48925592	C	T	CTCF CTCF-Cohesin	3.63968	-	EH38E1609671	chr12	48925449	48925799	PLS,CTCF-bound
3A550	Male	chr14	77213597	A	G	CTCF CTCF-Cohesin	3.63942	+	EH38E1730013	chr14	77213392	77213742	dELS,CTCF-bound
3E465	Male	chr19	35013086	C	CTG	CTCF CTCF-Cohesin	3.63939	+	EH38E1950552	chr19	35013018	35013362	dELS,CTCF-bound
G01-GEA163HI	Male	chr9	35658023	C	CTCAGCTTTACGTT	L5 Low signal	3.63883	-	EH38E2691927	chr9	35657678	35658023	PLS,CTCF-bound
G01-GEA070HI	Male	chr17	72477766	G	C	TF3 FOXA1 / AR / ESR1	3.63686	+	EH38E1883469	chr17	72477640	72477900	dELS,CTCF-bound
G01-GEA264HI	Male	chr17	7330394	G	A	CTCF CTCF-Cohesin	3.6358	+	EH38E1844268	chr17	7330298	7330568	PLS,CTCF-bound
G01-GEA050HI	Male	chr14	101972592	G	A	E5 B-cell-like	3.63474	+	EH38E1743631	chr14	101972413	101972763	dELS,CTCF-bound
G01-GEA279HI	Female	chr12	19130166	G	A	CTCF CTCF-Cohesin	3.63154	+	EH38E1596783	chr12	19129936	19130278	pELS,CTCF-bound
G01-GEA217HI	Male	chr1	95116794	T	C	CTCF CTCF-Cohesin	3.62924	+	EH38E1369650	chr1	95116713	95117040	pELS,CTCF-bound
3E475	Male	chr20	362646	G	A	E12 Erythroblast-like	3.6289	-	EH38E2091347	chr20	362436	362786	dELS,CTCF-bound
G01-GEA149HI	Male	chr5	171451173	C	G	E4 Multi-tissue	3.62741	-	EH38E2431239	chr5	171450954	171451255	dELS
G01-GEA337HI	Male	chr22	30202853	G	A	E4 Multi-tissue	3.62683	+	EH38E2157605	chr22	30202814	30202981	dELS
G01-GEA030HI	Male	chr13	98577024	TGCCGCCGCC	T	CTCF CTCF-Cohesin	3.62582	+	EH38E1691805	chr13	98577012	98577355	PLS,CTCF-bound
3D317	Female	chr4	6782714	G	GGCC	CTCF CTCF-Cohesin	3.62428	-	EH38E2278502	chr4	6782483	6782832	PLS,CTCF-bound
G01-GEA190HI	Male	chr9	129726781	G	C	CTCF CTCF-Cohesin	3.62232	-	EH38E2730802	chr9	129726698	129727037	dELS,CTCF-bound
3C559	Male	chr14	60657007	C	CAAGGG	CTCF CTCF-Cohesin	3.62192	+	EH38E1718925	chr14	60656897	60657057	pELS,CTCF-bound
G01-GEA252HI	Male	chr17	17663522	GCTCCGAGT	G	E12 Erythroblast-like	3.62144	+	EH38E1850319	chr17	17663292	17663642	dELS,CTCF-bound
3C560	Male	chr14	104681842	C	T	E4 Multi-tissue	3.61951	-	EH38E1746018	chr14	104681743	104682090	pELS,CTCF-bound
G01-GEA337HI	Male	chr2	58241366	C	A	P Promoter	3.61791	-	EH38E2000445	chr2	58241208	58241558	PLS,CTCF-bound
XA214	Female	chr2	48315429	C	G	CTCF CTCF-Cohesin	3.61178	+	EH38E1996475	chr2	48315336	48315515	pELS,CTCF-bound
G01-GEA070HI	Male	chr8	140636064	C	T	CTCF CTCF-Cohesin	3.60891	+	EH38E2673107	chr8	140635989	140636339	PLS,CTCF-bound
G01-GEA241HI	Male	chr11	9385023	G	C	CTCF CTCF-Cohesin	3.60639	-	EH38E1519147	chr11	9384986	9385314	pELS,CTCF-bound
G01-GEA118HI	Female	chr16	52565466	C	T	TF3 FOXA1 / AR / ESR1	3.60634	+	EH38E1815876	chr16	52565140	52565484	dELS
G01-GEA271HI	Male	chr19	46546656	C	T	E4 Multi-tissue	3.60297	-	EH38E1958411	chr19	46546531	46546777	dELS,CTCF-bound
G01-GEA124HI	Male	chr7	101077914	G	C	CTCF CTCF-Cohesin	3.60232	+	EH38E0917588	chr7	101077624	101077970	DNase-H3K4me3,CTCF-bound
G01-GEA003HI	Male	chr11	65720319	CCTT	C	CTCF CTCF-Cohesin	3.60086	+	EH38E1545494	chr11	65720224	65720384	pELS,CTCF-bound
3C559	Male	chr7	17408727	C	A	E12 Erythroblast-like	3.59985	-	EH38E2536940	chr7	17408536	17408882	dELS,CTCF-bound
G01-GEA103HI	Male	chr2	133568190	T	TA	CTCF CTCF-Cohesin	3.5996	-	EH38E2033965	chr2	133568116	133568356	pELS,CTCF-bound
G01-GEA120HI	Male	chr8	139957176	G	A	E4 Multi-tissue	3.59898	-	EH38E2672572	chr8	139957035	139957381	dELS,CTCF-bound
G01-GEA278HI	Male	chr15	24954860	TGAGG	T	CTCF CTCF-Cohesin	3.59745	-	EH38E1748362	chr15	24954806	24955142	PLS,CTCF-bound
4B858	Male	chr1	31944544	T	TC	CTCF CTCF-Cohesin	3.59607	-	EH38E1334676	chr1	31944366	31944715	dELS,CTCF-bound
G01-GEA103HI	Male	chr19	35154611	GC	G	E4 Multi-tissue	3.59593	+	EH38E1950718	chr19	35154499	35154842	PLS,CTCF-bound
G01-GEA306HI	Male	chr12	69024606	C	T	E4 Multi-tissue	3.59511	-	EH38E1622728	chr12	69024403	69024738	dELS
G01-GEA053HI	Female	chr4	15001774	G	A	CTCF CTCF-Cohesin	3.5949	-	EH38E2282812	chr4	15001686	15001892	pELS,CTCF-bound
G01-GEA251HI	Male	chr19	13846846	GC	G	E4 Multi-tissue	3.59421	-	EH38E1940797	chr19	13846545	13846895	dELS,CTCF-bound
G01-GEA070HI	Male	chr2	113157779	A	G	CTCF CTCF-Cohesin	3.59416	-	EH38E2025843	chr2	113157702	113157875	dELS,CTCF-bound
5G257	Male	chr20	34876870	TGGGGGCTCCCTGGGGGAGTC	T	CTCF CTCF-Cohesin	3.59242	+	EH38E2108721	chr20	34876693	34876918	PLS,CTCF-bound
3D612	Male	chr14	50560526	C	G	P Promoter	3.59004	+	EH38E1712907	chr14	50560434	50560784	pELS,CTCF-bound
3D632	Male	chr12	120194739	G	A	P Promoter	3.59004	-	EH38E1649692	chr12	120194596	120194881	PLS,CTCF-bound
3C145	Female	chr12	111599726	C	T	E4 Multi-tissue	3.58996	-	EH38E1644645	chr12	111599478	111599827	PLS,CTCF-bound
G01-GEA239HI	Male	chr2	237669721	ATGCCT	A	E12 Erythroblast-like	3.58991	+	EH38E2087581	chr2	237669679	237670028	dELS
G01-GEA219HI	Male	chr11	65382055	C	A	CTCF CTCF-Cohesin	3.58936	-	EH38E1544998	chr11	65381912	65382259	PLS,CTCF-bound
4B702	Male	chr14	104137820	C	CGG	CTCF CTCF-Cohesin	3.58898	-	EH38E1745601	chr14	104137624	104137972	PLS,CTCF-bound
3D317	Female	chr9	86099476	TCTCCCGCCGCCGCCGGCCTCGAG	T	CTCF CTCF-Cohesin	3.58858	+	EH38E2703163	chr9	86099438	86099783	PLS,CTCF-bound
3B571	Female	chr20	43457353	T	C	E4 Multi-tissue	3.58806	+	EH38E2114068	chr20	43457217	43457399	pELS,CTCF-bound
G01-GEA148HI	Female	chr11	19077101	C	G	E4 Multi-tissue	3.58749	+	EH38E1525489	chr11	19076999	19077330	dELS,CTCF-bound
G01-GEA281HI	Male	chr20	1802636	CTTCTTT	C	CTCF CTCF-Cohesin	3.58606	+	EH38E2092346	chr20	1802373	1802675	dELS,CTCF-bound
G01-GEA335HI	Male	chr1	172826579	C	T	E1 Stem cell	3.58335	+	EH38E1398012	chr1	172826483	172826800	dELS,CTCF-bound
G01-GEA219HI	Male	chr10	76087153	C	T	CTCF CTCF-Cohesin	3.58054	-	EH38E1480036	chr10	76087097	76087267	dELS,CTCF-bound
4B693	Male	chr9	99140955	CTTCT	C	CTCF CTCF-Cohesin	3.57981	+	EH38E2712192	chr9	99140678	99141005	dELS,CTCF-bound
3E475	Male	chr20	1393021	G	GCGGGCGGCGCGA	CTCF CTCF-Cohesin	3.57935	-	EH38E2092070	chr20	1392969	1393317	PLS,CTCF-bound
G01-GEA140HI	Male	chr12	67943565	TAGCCCAAGAC	T	CTCF CTCF-Cohesin	3.57833	-	EH38E1621896	chr12	67943343	67943632	dELS,CTCF-bound
G01-GEA281HI	Male	chr1	248873943	C	T	E12 Erythroblast-like	3.57808	-	EH38E1440803	chr1	248873653	248874003	dELS,CTCF-bound
G01-GEA167HI	Male	chr2	213152313	A	G	CTCF CTCF-Cohesin	3.57808	-	EH38E2072112	chr2	213152137	213152331	pELS,CTCF-bound
G01-GEA038HI	Male	chr8	102654049	GGCGGCCCGAGCCCGGATTGGCTGT	G	CTCF CTCF-Cohesin	3.57749	-	EH38E2653748	chr8	102653878	102654228	pELS,CTCF-bound
G01-GEA260HI	Male	chr10	78973352	CCTGT	C	E4 Multi-tissue	3.57739	-	EH38E1482199	chr10	78973116	78973462	dELS,CTCF-bound
G01-GEA182HI	Male	chr3	188297229	A	C	E4 Multi-tissue	3.57673	-	EH38E2267356	chr3	188296998	188297343	dELS,CTCF-bound
G01-GEA295HI	Male	chr7	5555113	T	C	E12 Erythroblast-like	3.57616	-	EH38E2531627	chr7	5554959	5555308	pELS,CTCF-bound
G01-GEA335HI	Male	chr2	219041646	T	G	CTCF CTCF-Cohesin	3.57411	+	EH38E2075822	chr2	219041424	219041699	PLS,CTCF-bound
3B336	Male	chr1	90721705	C	A	CTCF CTCF-Cohesin	3.57069	-	EH38E0102310	chr1	90721495	90721738	dELS,CTCF-bound
G01-GEA050HI	Male	chr22	40714725	C	T	E4 Multi-tissue	3.57063	+	EH38E2165800	chr22	40714530	40714877	dELS,CTCF-bound
G01-GEA173HI	Male	chr13	106533169	G	T	CTCF CTCF-Cohesin	3.56843	-	EH38E1695845	chr13	106533035	106533385	pELS,CTCF-bound
3C546	Male	chr3	9750119	A	G	E5 B-cell-like	3.56813	+	EH38E2177308	chr3	9749801	9750140	PLS,CTCF-bound
4B843	Male	chr20	13221955	ACGGTTTGTGGGGCGGGGGTGCTGAGCTAGTGCCGGGTGGATGCAGGGAGGCAGGTCCCCTGC	A	CTCF CTCF-Cohesin	3.56687	+	EH38E2098780	chr20	13221610	13221960	PLS,CTCF-bound
G01-GEA111HI	Male	chr1	204411351	A	G	P Promoter	3.56541	+	EH38E1414447	chr1	204411247	204411480	pELS,CTCF-bound
G01-GEA224HI	Female	chr16	67184223	C	G	TF5 AR	3.56487	+	EH38E1822713	chr16	67183886	67184236	PLS,CTCF-bound
G01-GEA173HI	Male	chr6	107489842	CGGGGAGGTGGCGGCCGCGGGGGGCGCCGCGAGCCGCCCGTGCCCGCCGCGGATGAACAG	C	E4 Multi-tissue	3.56411	+	EH38E2491433	chr6	107489817	107490165	PLS,CTCF-bound
G01-GEA185HI	Female	chr1	12166909	G	A	CTCF CTCF-Cohesin	3.56346	+	EH38E1319457	chr1	12166772	12167120	PLS,CTCF-bound
3D616	Female	chr1	4652818	T	C	E4 Multi-tissue	3.56285	-	EH38E1313427	chr1	4652611	4652915	pELS,CTCF-bound
G01-GEA251HI	Male	chr3	183099742	C	T	CTCF CTCF-Cohesin	3.56227	-	EH38E2263420	chr3	183099432	183099782	PLS,CTCF-bound
3C565	Male	chr7	151877186	G	A	CTCF CTCF-Cohesin	3.56208	-	EH38E2601966	chr7	151877105	151877290	PLS,CTCF-bound
G01-GEA160HI	Male	chr1	68111998	A	T	CTCF CTCF-Cohesin	3.5606	-	EH38E1357479	chr1	68111856	68112196	dELS,CTCF-bound
G01-GEA235HI	Male	chr18	48929041	C	G	E4 Multi-tissue	3.55988	-	EH38E1915441	chr18	48928806	48929151	dELS
G01-GEA045HI	Male	chr17	56834924	G	A	CTCF CTCF-Cohesin	3.55837	-	EH38E1872640	chr17	56834765	56835115	pELS,CTCF-bound
3C147	Male	chr22	31343522	GGT	G	TF3 FOXA1 / AR / ESR1	3.55693	-	EH38E2158590	chr22	31343297	31343644	dELS,CTCF-bound
3D630	Male	chr22	50294153	C	T	CTCF CTCF-Cohesin	3.55687	-	EH38E2172989	chr22	50293891	50294240	dELS,CTCF-bound
G01-GEA104HI	Male	chr3	8663681	TTAAC	T	CTCF CTCF-Cohesin	3.55608	+	EH38E2176604	chr3	8663570	8663796	dELS,CTCF-bound
G01-GEA264HI	Male	chr7	98352954	CA	C	E4 Multi-tissue	3.55589	+	EH38E2574265	chr7	98352638	98352982	dELS
2F867	Male	chr1	173824175	CCTGCGACTTCACTCTGGGAGGGACATTTCCGCTCACCCAGCT	C	CTCF CTCF-Cohesin	3.55431	-	EH38E1398542	chr1	173824141	173824294	PLS,CTCF-bound
G01-GEA041HI	Female	chr15	40769736	GC	G	E4 Multi-tissue	3.55424	+	EH38E1756160	chr15	40769591	40769940	pELS,CTCF-bound
G01-GEA214HI	Male	chr8	28365926	CAT	C	E4 Multi-tissue	3.55373	-	EH38E2620316	chr8	28365803	28366144	dELS
G01-GEA207HI	Male	chr22	49632374	G	C	E4 Multi-tissue	3.55298	+	EH38E2172348	chr22	49632319	49632495	dELS,CTCF-bound
G01-GEA260HI	Male	chrX	13377718	C	G	E4 Multi-tissue	3.55282	-	EH38E2743207	chrX	13377562	13377909	pELS
4B716	Male	chr15	45522623	G	A	CTCF CTCF-Cohesin	3.55172	+	EH38E1758917	chr15	45522552	45522894	PLS,CTCF-bound
G01-GEA264HI	Male	chr15	47471754	A	G	E4 Multi-tissue	3.55064	-	EH38E1759526	chr15	47471489	47471839	dELS,CTCF-bound
3E480	Male	chr11	94128398	G	A	CTCF CTCF-Cohesin	3.54744	+	EH38E1561746	chr11	94128398	94128604	pELS,CTCF-bound
G01-GEA292HI	Male	chr16	30948469	C	G	CTCF CTCF-Cohesin	3.54613	+	EH38E1811861	chr16	30948174	30948523	PLS,CTCF-bound
4B716	Male	chr1	2234473	G	A	CTCF CTCF-Cohesin	3.54535	-	EH38E1311664	chr1	2234408	2234756	dELS,CTCF-bound
G01-GEA136HI	Male	chr9	136849263	G	A	CTCF CTCF-Cohesin	3.54161	+	EH38E2737243	chr9	136849158	136849506	pELS,CTCF-bound
2F730	Male	chr2	63050756	G	A	CTCF CTCF-Cohesin	3.54052	-	EH38E2002989	chr2	63050696	63050945	PLS,CTCF-bound
G01-GEA110HI	Female	chr2	28958895	G	T	CTCF CTCF-Cohesin	3.54033	-	EH38E1984023	chr2	28958686	28959034	dELS,CTCF-bound
G01-GEA229HI	Male	chr2	167293162	G	A	CTCF CTCF-Cohesin	3.53945	+	EH38E2048690	chr2	167292826	167293176	PLS,CTCF-bound
G01-GEA278HI	Male	chrX	115893072	T	G	CTCF CTCF-Cohesin	3.53513	-	EH38E2765391	chrX	115892957	115893306	dELS,CTCF-bound
G01-GEA252HI	Male	chr1	85576964	GCCGCCA	G	CTCF CTCF-Cohesin	3.53314	+	EH38E1363971	chr1	85576931	85577272	pELS,CTCF-bound
G01-GEA023HI	Male	chr19	9793303	T	C	CTCF CTCF-Cohesin	3.53304	+	EH38E1937781	chr19	9793099	9793388	pELS,CTCF-bound
G01-GEA305HI	Male	chr12	64609479	C	CTA	L5 Low signal	3.53202	+	EH38E1619711	chr12	64609337	64609548	PLS,CTCF-bound
G01-GEA003HI	Male	chr19	53866367	G	A	E4 Multi-tissue	3.53181	-	EH38E1963756	chr19	53866231	53866450	PLS,CTCF-bound
G01-GEA139HI	Male	chr17	8173545	G	C	CTCF CTCF-Cohesin	3.5314	-	EH38E1845061	chr17	8173235	8173578	PLS,CTCF-bound
G01-GEA028HI	Male	chr5	172660007	G	A	E5 B-cell-like	3.53135	-	EH38E2432181	chr5	172659972	172660268	dELS
G01-GEA043HI	Male	chr3	196712995	T	C	CTCF CTCF-Cohesin	3.53125	+	EH38E2272878	chr3	196712968	196713160	pELS,CTCF-bound
G01-GEA143HI	Female	chr6	36442998	GC	G	CTCF CTCF-Cohesin	3.52963	+	EH38E2463232	chr6	36442775	36443124	PLS,CTCF-bound
G01-GEA310HI	Male	chr17	59859604	T	C	CTCF CTCF-Cohesin	3.52937	-	EH38E1875117	chr17	59859463	59859793	dELS,CTCF-bound
G01-GEA143HI	Female	chr1	181482611	TCG	T	CTCF CTCF-Cohesin	3.52926	-	EH38E1402700	chr1	181482518	181482680	pELS,CTCF-bound
G01-GEA090HI	Male	chr2	37925020	G	C	CTCF CTCF-Cohesin	3.52735	+	EH38E1988728	chr2	37924985	37925150	pELS,CTCF-bound
5L790	Male	chr10	43690686	T	C	CTCF CTCF-Cohesin	3.52686	-	EH38E1464114	chr10	43690489	43690760	dELS,CTCF-bound
G01-GEA163HI	Male	chr12	71158789	C	T	E6 Weak epithelial	3.52674	+	EH38E1623870	chr12	71158508	71158851	pELS
3B568	Male	chr3	101512801	G	C	CTCF CTCF-Cohesin	3.52625	+	EH38E2222393	chr3	101512688	101512893	pELS,CTCF-bound
G01-GEA149HI	Male	chr1	39934577	G	A	E4 Multi-tissue	3.52444	-	EH38E1339792	chr1	39934351	39934643	dELS,CTCF-bound
G01-GEA003HI	Male	chr19	41309868	A	C	E4 Multi-tissue	3.52437	+	EH38E1954694	chr19	41309773	41309940	pELS,CTCF-bound
G01-GEA040HI	Male	chr17	81024060	TG	T	CTCF CTCF-Cohesin	3.524	+	EH38E1891707	chr17	81023798	81024140	pELS,CTCF-bound
2F867	Male	chr1	91886272	G	C	P Promoter	3.52366	+	EH38E1367337	chr1	91886009	91886358	PLS,CTCF-bound
G01-GEA158HI	Male	chr4	87092893	G	A	E4 Multi-tissue	3.52226	+	EH38E2310493	chr4	87092757	87093104	dELS,CTCF-bound
2F730	Male	chr11	707094	C	T	E4 Multi-tissue	3.52221	-	EH38E1513854	chr11	707037	707249	pELS,CTCF-bound
3E475	Male	chr6	53548254	C	G	E5 B-cell-like	3.52011	-	EH38E2473923	chr6	53547991	53548341	dELS,CTCF-bound
4B702	Male	chr1	117340077	G	A	CTCF CTCF-Cohesin	3.52004	-	EH38E1380382	chr1	117339962	117340295	dELS,CTCF-bound
G01-GEA100HI	Male	chr6	32192900	CTCTT	C	E12 Erythroblast-like	3.51951	+	EH38E2459869	chr6	32192689	32192993	PLS,CTCF-bound
G01-GEA305HI	Male	chr3	180912397	G	C	E5 B-cell-like	3.5194	-	EH38E2262364	chr3	180912320	180912670	PLS,CTCF-bound
G01-GEA147HI	Male	chr5	88827209	CA	C	E4 Multi-tissue	3.51935	-	EH38E2389449	chr5	88827141	88827482	pELS,CTCF-bound
G01-GEA114HI	Male	chr16	720555	C	A	CTCF CTCF-Cohesin	3.51884	+	EH38E1795023	chr16	720383	720733	pELS,CTCF-bound
G01-GEA148HI	Female	chr19	58033902	A	G	CTCF CTCF-Cohesin	3.51838	-	EH38E1966129	chr19	58033743	58034093	PLS,CTCF-bound
4B713	Male	chr1	41366733	CTAATT	C	CTCF CTCF-Cohesin	3.51763	+	EH38E1340858	chr1	41366618	41366847	dELS,CTCF-bound
G01-GEA309HI	Male	chr3	157159360	T	C	CTCF CTCF-Cohesin	3.51731	+	EH38E2251905	chr3	157159319	157159669	pELS,CTCF-bound
G01-GEA327HI	Male	chr8	6736630	G	A	E12 Erythroblast-like	3.51707	+	EH38E2608208	chr8	6736627	6736969	dELS
G01-GEA053HI	Female	chr19	44776583	C	T	CTCF CTCF-Cohesin	3.51694	-	EH38E1956893	chr19	44776377	44776677	pELS,CTCF-bound
G01-GEA269HI	Male	chr5	40798761	C	A	CTCF CTCF-Cohesin	3.51659	+	EH38E2368445	chr5	40798588	40798851	pELS,CTCF-bound
G01-GEA260HI	Male	chr2	100417424	G	A	CTCF CTCF-Cohesin	3.51646	+	EH38E2019078	chr2	100417345	100417683	PLS,CTCF-bound
G01-GEA025HI	Male	chr14	99982658	T	A	CTCF CTCF-Cohesin	3.51609	-	EH38E1741916	chr14	99982487	99982837	dELS,CTCF-bound
G01-GEA160HI	Male	chr7	64225	G	A	CTCF CTCF-Cohesin	3.51583	+	EH38E2527160	chr7	64081	64413	dELS,CTCF-bound
3C562	Male	chr17	81365379	C	T	E4 Multi-tissue	3.51519	+	EH38E1892129	chr17	81365127	81365472	dELS,CTCF-bound
3C573	Male	chr17	65074895	A	C	TF3 FOXA1 / AR / ESR1	3.51491	-	EH38E1878879	chr17	65074838	65075187	dELS,CTCF-bound
G01-GEA241HI	Male	chr15	67150239	A	C	E12 Erythroblast-like	3.51445	-	EH38E1772194	chr15	67150057	67150369	dELS
G01-GEA287HI	Male	chr12	6345495	A	G	E4 Multi-tissue	3.51368	-	EH38E1589837	chr12	6345374	6345723	pELS,CTCF-bound
G01-GEA287HI	Male	chr6	4775617	AGCCGCGCCCTCGCGCCGCCCTCC	A	CTCF CTCF-Cohesin	3.51362	-	EH38E2441793	chr6	4775549	4775899	pELS,CTCF-bound
3C546	Male	chr8	70402758	A	ACCTCCC	CTCF CTCF-Cohesin	3.51314	-	EH38E2639060	chr8	70402649	70402858	pELS,CTCF-bound
4B699	Male	chr8	143597651	C	A	CTCF CTCF-Cohesin	3.51305	+	EH38E2675390	chr8	143597561	143597880	PLS,CTCF-bound
[truncated: 11,261 more rows]

## Sheet:  Suplementary Table 2.2
Supplementary Table 2.2. 95th-Percentile Inherited Regulatory Variants Annotated to 662 cCREs (648 Unique); Recurrent cCREs (Bold) Excluded from T-Gene Analysis.
SAMPLE		COORDINATES (GRch38)				SEI PREDICTION			ENCODE CCRE (GRch38)
Sample Code	Sample sex	CHR	BP	REF	ALT	Regulatory class	Score	Effect	cCRE code	cCRE chr	cCRE start	cCRE end	ENCODE class	Coordinated of 662 cCREs in 95th-Percentile
G01-GEA065HI	Male	chr9	109440901	TA	T	CTCF CTCF-Cohesin	41.4079	-	EH38E2716750	chr9	109440742	109441091	dELS,CTCF-bound	chr9	109440742	109441091
G01-GEA096HI	Male	chr20	48620659	AT	A	CTCF CTCF-Cohesin	41.3718	-	EH38E2117983	chr20	48620476	48620825	dELS,CTCF-bound	chr20	48620476	48620825
G01-GEA301HI	Male	chr19	7341266	GC	G	CTCF CTCF-Cohesin	41.2766	-	EH38E1936382	chr19	7341060	7341407	dELS,CTCF-bound	chr19	7341060	7341407
G01-GEA309HI	Male	chr1	168082436	TAG	T	CTCF CTCF-Cohesin	41.1315	-	EH38E1395197	chr1	168082235	168082585	dELS,CTCF-bound	chr1	168082235	168082585
G01-GEA169HI	Male	chr12	49235334	GGCGCCATCTGCTGGAC	G	CTCF CTCF-Cohesin	40.2487	-	EH38E1609942	chr12	49235171	49235419	dELS,CTCF-bound	chr12	49235171	49235419
G01-GEA025HI	Male	chr2	105369980	G	A	CTCF CTCF-Cohesin	39.9618	-	EH38E2021716	chr2	105369812	105370162	dELS,CTCF-bound	chr2	105369812	105370162
G01-GEA118HI	Female	chr16	13866317	G	A	CTCF CTCF-Cohesin	39.5322	-	EH38E1803430	chr16	13866173	13866522	CTCF-only,CTCF-bound	chr16	13866173	13866522
G01-GEA220HI	Male	chr2	96407519	G	C	CTCF CTCF-Cohesin	38.0198	-	EH38E2016626	chr2	96407465	96407814	dELS,CTCF-bound	chr2	96407465	96407814
G01-GEA266HI	Male	chr18	27605420	AG	A	CTCF CTCF-Cohesin	37.8361	-	EH38E1906396	chr18	27605170	27605519	dELS,CTCF-bound	chr18	27605170	27605519
G01-GEA024HI	Female	chr7	143008098	CCACCAGGTGGAGCTGAATCCA	C	CTCF CTCF-Cohesin	37.7214	-	EH38E2597897	chr7	143007939	143008287	dELS,CTCF-bound	chr7	143007939	143008287
G01-GEA309HI	Male	chr17	8080117	AG	A	CTCF CTCF-Cohesin	37.5934	-	EH38E1844928	chr17	8079904	8080241	pELS,CTCF-bound	chr17	8079904	8080241
2K890	Male	chr12	48890860	C	G	CTCF CTCF-Cohesin	37.4554	-	EH38E1609657	chr12	48890707	48891046	pELS,CTCF-bound	chr12	48890707	48891046
G01-GEA003HI	Male	chr2	95115519	G	A	CTCF CTCF-Cohesin	37.3531	-	EH38E2016050	chr2	95115351	95115689	dELS,CTCF-bound	chr2	95115351	95115689
G01-GEA032HI	Female	chr6	39892710	C	G	CTCF CTCF-Cohesin	36.6684	-	EH38E2465942	chr6	39892573	39892822	dELS,CTCF-bound	chr6	39892573	39892822
G01-GEA307HI	Female	chr13	106620134	C	G	CTCF CTCF-Cohesin	36.6335	-	EH38E1695922	chr13	106619982	106620248	dELS,CTCF-bound	chr13	106619982	106620248
3D317	Female	chr6	107675520	C	T	CTCF CTCF-Cohesin	36.4641	-	EH38E2491625	chr6	107675389	107675650	dELS,CTCF-bound	chr6	107675389	107675650
G01-GEA160HI	Male	chr5	138068956	T	G	CTCF CTCF-Cohesin	36.3907	-	EH38E2412358	chr5	138068771	138069113	pELS,CTCF-bound	chr5	138068771	138069113
G01-GEA148HI	Female	chr5	97231227	C	T	CTCF CTCF-Cohesin	36.2965	-	EH38E2393714	chr5	97231097	97231408	CTCF-only,CTCF-bound	chr5	97231097	97231408
3C142	Female	chr9	132507843	G	C	CTCF CTCF-Cohesin	35.5773	-	EH38E2733250	chr9	132507666	132508007	dELS,CTCF-bound	chr9	132507666	132508007
G01-GEA025HI	Male	chr17	70552624	C	A	CTCF CTCF-Cohesin	34.6148	-	EH38E1882549	chr17	70552457	70552782	dELS,CTCF-bound	chr17	70552457	70552782
3E468	Female	chr20	7936669	G	A	CTCF CTCF-Cohesin	34.3861	-	EH38E2096021	chr20	7936442	7936792	dELS,CTCF-bound	chr20	7936442	7936792
G01-GEA025HI	Male	chr1	39092544	C	G	CTCF CTCF-Cohesin	34.1593	-	EH38E1339099	chr1	39092381	39092685	dELS,CTCF-bound	chr1	39092381	39092685
G01-GEA110HI	Female	chr2	130873902	G	A	CTCF CTCF-Cohesin	34.1136	-	EH38E2032978	chr2	130873813	130873984	dELS,CTCF-bound	chr2	130873813	130873984
G01-GEA101HI	Male	chr21	35051416	G	C	CTCF CTCF-Cohesin	34.1038	-	EH38E2139357	chr21	35051314	35051664	dELS,CTCF-bound	chr21	35051314	35051664
G01-GEA309HI	Male	chr4	86044194	CT	C	CTCF CTCF-Cohesin	34.0237	-	EH38E2309838	chr4	86044067	86044322	dELS,CTCF-bound	chr4	86044067	86044322
G01-GEA262HI	Female	chr7	29102741	G	A	CTCF CTCF-Cohesin	34.0002	-	EH38E2544170	chr7	29102658	29102820	dELS,CTCF-bound	chr7	29102658	29102820
G01-GEA167HI	Male	chr1	22665947	G	C	CTCF CTCF-Cohesin	33.9611	-	EH38E1327162	chr1	22665867	22666098	CTCF-only,CTCF-bound	chr1	22665867	22666098
G01-GEA260HI	Male	chr7	41977297	G	A	CTCF CTCF-Cohesin	33.7834	-	EH38E2551623	chr7	41977081	41977411	dELS,CTCF-bound	chr7	41977081	41977411
3D616	Female	chr19	14043210	G	C	CTCF CTCF-Cohesin	32.9613	-	EH38E1940992	chr19	14043034	14043380	dELS,CTCF-bound	chr19	14043034	14043380
G01-GEA219HI	Male	chr4	52376289	CCAGCAGGGGG	C	CTCF CTCF-Cohesin	32.9133	-	EH38E2296385	chr4	52376204	52376549	dELS,CTCF-bound	chr4	52376204	52376549
4B848	Male	chr9	90871228	G	A	CTCF CTCF-Cohesin	32.7411	-	EH38E2706433	chr9	90871076	90871354	dELS,CTCF-bound	chr9	90871076	90871354
G01-GEA229HI	Male	chr6	148145113	G	A	CTCF CTCF-Cohesin	32.7221	-	EH38E2513115	chr6	148144971	148145312	dELS,CTCF-bound	chr6	148144971	148145312
XH678	Male	chr2	84303103	AG	A	CTCF CTCF-Cohesin	32.6967	-	EH38E2013004	chr2	84302925	84303213	dELS,CTCF-bound	chr2	84302925	84303213
G01-GEA114HI	Male	chr18	76803940	C	T	CTCF CTCF-Cohesin	32.6061	-	EH38E1927977	chr18	76803746	76804094	pELS,CTCF-bound	chr18	76803746	76804094
G01-GEA148HI	Female	chr10	52818125	G	A	CTCF CTCF-Cohesin	32.3182	-	EH38E1468542	chr10	52817988	52818337	dELS,CTCF-bound	chr10	52817988	52818337
G01-GEA214HI	Male	chr12	93419614	C	G	CTCF CTCF-Cohesin	32.0923	-	EH38E1633442	chr12	93419464	93419753	dELS,CTCF-bound	chr12	93419464	93419753
3E475	Male	chr7	157273730	C	G	CTCF CTCF-Cohesin	31.7822	-	EH38E2604381	chr7	157273573	157273909	dELS,CTCF-bound	chr7	157273573	157273909
3D317	Female	chr22	50252339	C	T	CTCF CTCF-Cohesin	31.7608	-	EH38E2172938	chr22	50252178	50252486	pELS,CTCF-bound	chr22	50252178	50252486
G01-GEA180HI	Male	chr1	224050999	C	A	CTCF CTCF-Cohesin	31.7488	-	EH38E1426232	chr1	224050740	224051072	dELS,CTCF-bound	chr1	224050740	224051072
3C572	Male	chr1	118151530	G	C	CTCF CTCF-Cohesin	31.7349	-	EH38E1380853	chr1	118151454	118151619	CTCF-only,CTCF-bound	chr1	118151454	118151619
3C560	Male	chr20	45011271	A	T	CTCF CTCF-Cohesin	31.5259	-	EH38E2115257	chr20	45011201	45011545	dELS,CTCF-bound	chr20	45011201	45011545
G01-GEA053HI	Female	chr12	68830404	C	T	CTCF CTCF-Cohesin	31.3624	-	EH38E1622532	chr12	68830227	68830500	dELS,CTCF-bound	chr12	68830227	68830500
G01-GEA032HI	Female	chr1	204989487	A	T	CTCF CTCF-Cohesin	31.3358	-	EH38E1414978	chr1	204989315	204989614	dELS,CTCF-bound	chr1	204989315	204989614
3C554	Male	chr14	77070850	T	G	CTCF CTCF-Cohesin	31.2937	-	EH38E1729881	chr14	77070678	77071022	dELS,CTCF-bound	chr14	77070678	77071022
3D317	Female	chr19	11131147	G	A	CTCF CTCF-Cohesin	31.2725	-	EH38E1938969	chr19	11131075	11131423	dELS,CTCF-bound	chr19	11131075	11131423
3D317	Female	chr3	38480030	C	T	CTCF CTCF-Cohesin	31.1927	-	EH38E2193281	chr3	38479910	38480108	CTCF-only,CTCF-bound	chr3	38479910	38480108
G01-GEA001HI	Male	chr11	69643511	C	T	CTCF CTCF-Cohesin	31.1503	-	EH38E1548982	chr11	69643284	69643631	dELS,CTCF-bound	chr11	69643284	69643631
G01-GEA101HI	Male	chr21	35051415	A	C	CTCF CTCF-Cohesin	30.5536	-	EH38E2139357	chr21	35051314	35051664	dELS,CTCF-bound	chr21	35051314	35051664
G01-GEA163HI	Male	chr10	132940490	C	A	CTCF CTCF-Cohesin	30.4928	-	EH38E1512767	chr10	132940428	132940601	dELS,CTCF-bound	chr10	132940428	132940601
G01-GEA235HI	Male	chr2	189412552	G	C	CTCF CTCF-Cohesin	30.3717	-	EH38E2060151	chr2	189412459	189412616	dELS,CTCF-bound	chr2	189412459	189412616
G01-GEA241HI	Male	chr5	61817921	C	T	CTCF CTCF-Cohesin	30.3716	-	EH38E2376688	chr5	61817643	61817990	dELS,CTCF-bound	chr5	61817643	61817990
2K890	Male	chr6	33744566	C	T	CTCF CTCF-Cohesin	30.181	-	EH38E2460953	chr6	33744245	33744593	dELS,CTCF-bound	chr6	33744245	33744593
3E473	Male	chr6	84228159	G	A	CTCF CTCF-Cohesin	30.0382	-	EH38E2482832	chr6	84228061	84228226	pELS,CTCF-bound	chr6	84228061	84228226
G01-GEA248HI	Male	chr5	112757780	C	G	CTCF CTCF-Cohesin	29.8623	-	EH38E2399336	chr5	112757588	112757938	dELS,CTCF-bound	chr5	112757588	112757938
5L790	Male	chr17	2026183	C	A	CTCF CTCF-Cohesin	29.696	-	EH38E1840524	chr17	2026019	2026316	pELS,CTCF-bound	chr17	2026019	2026316
G01-GEA284HI	Male	chr3	122258981	GCCA	G	CTCF CTCF-Cohesin	29.484	-	EH38E2232049	chr3	122258830	122259088	dELS,CTCF-bound	chr3	122258830	122259088
G01-GEA337HI	Male	chr20	37202548	G	C	CTCF CTCF-Cohesin	29.2782	-	EH38E2110460	chr20	37202239	37202584	dELS,CTCF-bound	chr20	37202239	37202584
G01-GEA041HI	Female	chr5	14352275	G	C	CTCF CTCF-Cohesin	29.2627	-	EH38E2358329	chr5	14352194	14352397	dELS,CTCF-bound	chr5	14352194	14352397
G01-GEA132HI	Male	chr16	50210720	G	C	CTCF CTCF-Cohesin	29.0645	-	EH38E1814645	chr16	50210499	50210848	dELS,CTCF-bound	chr16	50210499	50210848
G01-GEA258HI	Female	chr8	47997423	G	C	CTCF CTCF-Cohesin	29.0507	-	EH38E2629214	chr8	47997311	47997512	dELS,CTCF-bound	chr8	47997311	47997512
G01-GEA111HI	Male	chr15	77659906	C	T	CTCF CTCF-Cohesin	29.0221	-	EH38E1779929	chr15	77659733	77660077	PLS,CTCF-bound	chr15	77659733	77660077
G01-GEA110HI	Female	chr10	88932841	C	T	CTCF CTCF-Cohesin	28.8492	-	EH38E1486760	chr10	88932588	88932925	PLS,CTCF-bound	chr10	88932588	88932925
G01-GEA158HI	Male	chr12	44931197	C	G	CTCF CTCF-Cohesin	28.624	-	EH38E1607105	chr12	44931056	44931323	dELS,CTCF-bound	chr12	44931056	44931323
2F867	Male	chr10	25227280	C	T	CTCF CTCF-Cohesin	28.5584	-	EH38E1456147	chr10	25227130	25227395	dELS,CTCF-bound	chr10	25227130	25227395
3C559	Male	chr18	54444517	G	A	CTCF CTCF-Cohesin	28.3885	-	EH38E1917853	chr18	54444338	54444685	dELS,CTCF-bound	chr18	54444338	54444685
G01-GEA288HI	Male	chr11	71580263	G	A	CTCF CTCF-Cohesin	28.3358	-	EH38E1550244	chr11	71580015	71580359	CTCF-only,CTCF-bound	chr11	71580015	71580359
2H163	Male	chr9	34437540	G	T	CTCF CTCF-Cohesin	28.2639	-	EH38E2691147	chr9	34437389	34437701	dELS,CTCF-bound	chr9	34437389	34437701
G01-GEA027HI	Male	chr4	82722004	ACTGGGGACAGTG	A	CTCF CTCF-Cohesin	28.2563	-	EH38E2308134	chr4	82721898	82722114	dELS,CTCF-bound	chr4	82721898	82722114
3C545	Male	chr12	11581366	C	G	CTCF CTCF-Cohesin	28.2143	-	EH38E1592728	chr12	11581220	11581524	dELS,CTCF-bound	chr12	11581220	11581524
4B710	Male	chr4	121370923	TG	T	CTCF CTCF-Cohesin	27.8237	-	EH38E2323955	chr4	121370856	121371013	CTCF-only,CTCF-bound	chr4	121370856	121371013
G01-GEA104HI	Male	chr19	41873338	G	A	CTCF CTCF-Cohesin	27.489	-	EH38E1955073	chr19	41873135	41873485	dELS,CTCF-bound	chr19	41873135	41873485
G01-GEA186HI	Female	chr6	108542186	C	T	CTCF CTCF-Cohesin	27.4306	-	EH38E2492133	chr6	108542069	108542416	dELS,CTCF-bound	chr6	108542069	108542416
4C200	Female	chr21	34890204	C	T	CTCF CTCF-Cohesin	27.0506	-	EH38E2139150	chr21	34890015	34890361	pELS,CTCF-bound	chr21	34890015	34890361
G01-GEA266HI	Male	chr3	172596295	C	T	CTCF CTCF-Cohesin	26.9041	-	EH38E2258563	chr3	172596114	172596439	pELS,CTCF-bound	chr3	172596114	172596439
4B691	Female	chr21	15483363	C	T	CTCF CTCF-Cohesin	26.847	-	EH38E2131184	chr21	15483163	15483509	dELS,CTCF-bound	chr21	15483163	15483509
G01-GEA104HI	Male	chr5	137075368	C	T	CTCF CTCF-Cohesin	26.825	-	EH38E2411735	chr5	137075185	137075532	dELS,CTCF-bound	chr5	137075185	137075532
G01-GEA026HI	Male	chr20	34069447	ACT	A	CTCF CTCF-Cohesin	26.705	-	EH38E2108174	chr20	34069265	34069609	dELS,CTCF-bound	chr20	34069265	34069609
3B336	Male	chr12	43445141	G	A	CTCF CTCF-Cohesin	26.2932	-	EH38E1606607	chr12	43444995	43445285	CTCF-only,CTCF-bound	chr12	43444995	43445285
3C139	Male	chr20	36836871	G	T	CTCF CTCF-Cohesin	26.2138	-	EH38E2110246	chr20	36836715	36837037	dELS,CTCF-bound	chr20	36836715	36837037
G01-GEA207HI	Male	chr2	218658755	G	T	CTCF CTCF-Cohesin	26.0311	-	EH38E2075530	chr2	218658631	218658947	pELS,CTCF-bound	chr2	218658631	218658947
3A671	Female	chr11	5600450	C	A	CTCF CTCF-Cohesin	25.9426	-	EH38E1517085	chr11	5600315	5600657	dELS,CTCF-bound	chr11	5600315	5600657
G01-GEA190HI	Male	chr20	51966513	C	T	CTCF CTCF-Cohesin	25.4486	-	EH38E2121262	chr20	51966335	51966685	dELS,CTCF-bound	chr20	51966335	51966685
3G089	Male	chr4	94596087	C	T	CTCF CTCF-Cohesin	25.4454	-	EH38E2313315	chr4	94595948	94596206	dELS,CTCF-bound	chr4	94595948	94596206
G01-GEA111HI	Male	chr1	211470250	G	A	CTCF CTCF-Cohesin	25.4321	-	EH38E1419529	chr1	211470008	211470322	dELS,CTCF-bound	chr1	211470008	211470322
G01-GEA090HI	Male	chr2	223798317	T	G	CTCF CTCF-Cohesin	25.3274	-	EH38E2078559	chr2	223798250	223798432	dELS,CTCF-bound	chr2	223798250	223798432
2F867	Male	chr1	25744294	C	T	CTCF CTCF-Cohesin	25.3138	-	EH38E1329829	chr1	25744146	25744492	dELS,CTCF-bound	chr1	25744146	25744492
G01-GEA284HI	Male	chr6	52087878	A	G	CTCF CTCF-Cohesin	24.827	-	EH38E2472765	chr6	52087574	52087908	PLS,CTCF-bound	chr6	52087574	52087908
5L790	Male	chr3	27312272	G	A	CTCF CTCF-Cohesin	24.8008	-	EH38E2187138	chr3	27312141	27312490	dELS,CTCF-bound	chr3	27312141	27312490
G01-GEA074HI	Male	chr1	1292027	C	T	CTCF CTCF-Cohesin	24.7855	-	EH38E1310726	chr1	1291826	1292171	dELS,CTCF-bound	chr1	1291826	1292171
3E468	Female	chr3	124351883	C	T	CTCF CTCF-Cohesin	24.5656	-	EH38E2233557	chr3	124351753	124352102	dELS,CTCF-bound	chr3	124351753	124352102
G01-GEA232HI	Male	chr12	26845257	G	T	CTCF CTCF-Cohesin	24.4807	-	EH38E1600680	chr12	26845143	26845341	dELS,CTCF-bound	chr12	26845143	26845341
4B693	Male	chr12	74317184	G	A	CTCF CTCF-Cohesin	24.4235	-	EH38E1624795	chr12	74317151	74317303	dELS,CTCF-bound	chr12	74317151	74317303
3D628	Male	chr1	1372237	T	G	CTCF CTCF-Cohesin	24.352	-	EH38E1310842	chr1	1372062	1372397	dELS,CTCF-bound	chr1	1372062	1372397
G01-GEA148HI	Female	chr19	480354	C	T	CTCF CTCF-Cohesin	24.301	-	EH38E1929988	chr19	480179	480446	dELS,CTCF-bound	chr19	480179	480446
4B716	Male	chr1	159936586	CCAG	C	CTCF CTCF-Cohesin	24.1988	-	EH38E1390019	chr1	159936542	159936887	dELS,CTCF-bound	chr1	159936542	159936887
3E475	Male	chr15	62254537	G	A	CTCF CTCF-Cohesin	24.1818	-	EH38E1767978	chr15	62254360	62254684	pELS,CTCF-bound	chr15	62254360	62254684
3E468	Female	chr17	57121523	A	G	CTCF CTCF-Cohesin	24.1105	-	EH38E1872876	chr17	57121464	57121665	dELS,CTCF-bound	chr17	57121464	57121665
3E466	Male	chr1	112718861	C	T	CTCF CTCF-Cohesin	23.9613	-	EH38E1377199	chr1	112718776	112719018	DNase-H3K4me3,CTCF-bound	chr1	112718776	112719018
G01-GEA143HI	Female	chr9	129790492	C	T	CTCF CTCF-Cohesin	23.741	-	EH38E2730862	chr9	129790351	129790694	DNase-H3K4me3,CTCF-bound	chr9	129790351	129790694
G01-GEA139HI	Male	chr20	61120825	TCTCCTG	T	CTCF CTCF-Cohesin	23.6749	-	EH38E2127125	chr20	61120642	61120991	dELS,CTCF-bound	chr20	61120642	61120991
3E468	Female	chr16	30894215	CCGCCCCCTTGGAGCGCCTGGACGCTCAG	C	CTCF CTCF-Cohesin	23.6229	-	EH38E1811804	chr16	30893984	30894334	PLS,CTCF-bound	chr16	30893984	30894334
G01-GEA027HI	Male	chr20	38073650	G	C	CTCF CTCF-Cohesin	23.6224	-	EH38E2111258	chr20	38073353	38073696	dELS,CTCF-bound	chr20	38073353	38073696
G01-GEA103HI	Male	chr14	31082182	C	T	CTCF CTCF-Cohesin	23.6071	-	EH38E1706053	chr14	31082001	31082338	DNase-H3K4me3,CTCF-bound	chr14	31082001	31082338
G01-GEA158HI	Male	chr9	33415591	C	G	CTCF CTCF-Cohesin	23.6048	-	EH38E2690547	chr9	33415525	33415875	dELS,CTCF-bound	chr9	33415525	33415875
G01-GEA209HI	Male	chr4	80335964	C	T	CTCF CTCF-Cohesin	23.5764	-	EH38E2307084	chr4	80335876	80336040	PLS,CTCF-bound	chr4	80335876	80336040
3C563	Male	chr12	51847076	G	A	CTCF CTCF-Cohesin	23.5349	+	EH38E1611937	chr12	51846860	51847182	pELS,CTCF-bound	chr12	51846860	51847182
3C139	Male	chr7	1579670	T	TG	CTCF CTCF-Cohesin	23.4693	-	EH38E2528707	chr7	1579604	1579834	CTCF-only,CTCF-bound	chr7	1579604	1579834
G01-GEA003HI	Male	chr16	8661134	A	G	CTCF CTCF-Cohesin	23.3287	-	EH38E1799995	chr16	8660976	8661321	DNase-H3K4me3,CTCF-bound	chr16	8660976	8661321
3D616	Female	chr6	133973576	G	A	CTCF CTCF-Cohesin	23.2865	-	EH38E2504764	chr6	133973389	133973736	dELS,CTCF-bound	chr6	133973389	133973736
G01-GEA090HI	Male	chr1	83931855	C	T	CTCF CTCF-Cohesin	23.178	-	EH38E1362891	chr1	83931689	83932028	dELS,CTCF-bound	chr1	83931689	83932028
2J788	Male	chr8	19014511	C	A	CTCF CTCF-Cohesin	23.0885	-	EH38E2614163	chr8	19014341	19014688	pELS,CTCF-bound	chr8	19014341	19014688
G01-GEA161HI	Male	chr6	106223516	C	G	CTCF CTCF-Cohesin	22.5904	-	EH38E2490589	chr6	106223315	106223665	dELS,CTCF-bound	chr6	106223315	106223665
G01-GEA173HI	Male	chr12	31238985	G	A	CTCF CTCF-Cohesin	22.5639	-	EH38E1602980	chr12	31238832	31239144	DNase-H3K4me3,CTCF-bound	chr12	31238832	31239144
2K890	Male	chr6	167908269	G	T	CTCF CTCF-Cohesin	22.4541	-	EH38E2525275	chr6	167908140	167908394	dELS,CTCF-bound	chr6	167908140	167908394
3E467	Female	chr3	41894183	A	AG	CTCF CTCF-Cohesin	22.3495	-	EH38E2194952	chr3	41894085	41894258	CTCF-only,CTCF-bound	chr3	41894085	41894258
2K890	Male	chr6	43773511	G	A	CTCF CTCF-Cohesin	22.3048	-	EH38E2468798	chr6	43773329	43773677	pELS,CTCF-bound	chr6	43773329	43773677
G01-GEA003HI	Male	chr6	99822913	G	A	CTCF CTCF-Cohesin	22.2134	-	EH38E2488250	chr6	99822701	99823042	dELS,CTCF-bound	chr6	99822701	99823042
G01-GEA208HI	Male	chr7	138886657	G	A	CTCF CTCF-Cohesin	22.1519	-	EH38E2595254	chr7	138886509	138886858	dELS,CTCF-bound	chr7	138886509	138886858
3E473	Male	chr14	53055090	C	T	CTCF CTCF-Cohesin	21.7708	-	EH38E1714595	chr14	53055012	53055179	dELS,CTCF-bound	chr14	53055012	53055179
G01-GEA136HI	Male	chr1	153627686	C	G	CTCF CTCF-Cohesin	21.2714	-	EH38E1385569	chr1	153627419	153627759	pELS,CTCF-bound	chr1	153627419	153627759
G01-GEA167HI	Male	chr11	116217200	A	C	CTCF CTCF-Cohesin	21.0866	-	EH38E1572402	chr11	116217086	116217345	CTCF-only,CTCF-bound	chr11	116217086	116217345
G01-GEA209HI	Male	chr12	66861344	T	G	CTCF CTCF-Cohesin	21.037	-	EH38E1621255	chr12	66861182	66861499	dELS,CTCF-bound	chr12	66861182	66861499
3C572	Male	chrX	129605617	C	T	CTCF CTCF-Cohesin	21.017	-	EH38E2767995	chrX	129605471	129605797	dELS,CTCF-bound	chrX	129605471	129605797
G01-GEA232HI	Male	chr12	95820296	C	T	CTCF CTCF-Cohesin	20.9723	-	EH38E1635240	chr12	95820188	95820386	CTCF-only,CTCF-bound	chr12	95820188	95820386
G01-GEA148HI	Female	chr10	89369692	G	T	CTCF CTCF-Cohesin	20.8698	-	EH38E1487132	chr10	89369582	89369806	dELS,CTCF-bound	chr10	89369582	89369806
4B716	Male	chr6	107980499	G	T	CTCF CTCF-Cohesin	20.6171	-	EH38E2491820	chr6	107980429	107980587	dELS,CTCF-bound	chr6	107980429	107980587
G01-GEA335HI	Male	chr20	59515826	C	A	CTCF CTCF-Cohesin	20.4827	-	EH38E2126291	chr20	59515627	59515974	DNase-H3K4me3,CTCF-bound	chr20	59515627	59515974
G01-GEA211HI	Male	chr16	58512084	G	A	CTCF CTCF-Cohesin	20.4735	-	EH38E1819765	chr16	58511928	58512277	dELS,CTCF-bound	chr16	58511928	58512277
G01-GEA143HI	Female	chr3	138068758	C	T	CTCF CTCF-Cohesin	20.1726	-	EH38E2241661	chr3	138068642	138068989	dELS,CTCF-bound	chr3	138068642	138068989
G01-GEA040HI	Male	chr5	150161802	C	T	CTCF CTCF-Cohesin	20.1723	-	EH38E2420679	chr5	150161620	150161947	dELS,CTCF-bound	chr5	150161620	150161947
3C563	Male	chr11	120172403	T	C	CTCF CTCF-Cohesin	20.1661	-	EH38E1575642	chr11	120172357	120172532	dELS,CTCF-bound	chr11	120172357	120172532
3D317	Female	chr8	93975335	G	A	CTCF CTCF-Cohesin	20.1128	-	EH38E2648130	chr8	93975157	93975503	CTCF-only,CTCF-bound	chr8	93975157	93975503
G01-GEA264HI	Male	chr9	71604654	C	T	CTCF CTCF-Cohesin	20.1079	-	EH38E2696278	chr9	71604522	71604804	dELS,CTCF-bound	chr9	71604522	71604804
2F730	Male	chr10	96375512	C	T	CTCF CTCF-Cohesin	20.0809	-	EH38E1491053	chr10	96375411	96375756	dELS,CTCF-bound	chr10	96375411	96375756
G01-GEA176HI	Male	chr4	16265023	A	G	CTCF CTCF-Cohesin	20.0332	-	EH38E2283697	chr4	16264822	16265167	CTCF-only,CTCF-bound	chr4	16264822	16265167
G01-GEA105HI	Male	chr19	46488020	G	GC	CTCF CTCF-Cohesin	19.8976	-	EH38E1958364	chr19	46487845	46488180	dELS,CTCF-bound	chr19	46487845	46488180
G01-GEA239HI	Male	chr6	99613569	T	C	CTCF CTCF-Cohesin	19.8407	-	EH38E2488211	chr6	99613480	99613681	dELS,CTCF-bound	chr6	99613480	99613681
G01-GEA334HI	Male	chr11	15819858	G	A	CTCF CTCF-Cohesin	19.8208	-	EH38E1523715	chr11	15819737	15820086	dELS,CTCF-bound	chr11	15819737	15820086
G01-GEA027HI	Male	chr6	2791366	A	G	CTCF CTCF-Cohesin	19.6883	-	EH38E2440041	chr6	2791136	2791483	dELS,CTCF-bound	chr6	2791136	2791483
3C565	Male	chr11	122863916	G	T	CTCF CTCF-Cohesin	19.4847	-	EH38E1577653	chr11	122863753	122864092	pELS,CTCF-bound	chr11	122863753	122864092
3C545	Male	chr15	31978018	C	A	CTCF CTCF-Cohesin	19.3826	-	EH38E1751222	chr15	31977823	31978172	DNase-H3K4me3,CTCF-bound	chr15	31977823	31978172
3E480	Male	chr10	30392682	G	A	CTCF CTCF-Cohesin	19.2692	-	EH38E1458989	chr10	30392526	30392875	DNase-H3K4me3,CTCF-bound	chr10	30392526	30392875
G01-GEA218HI	Male	chr2	185739022	CCCTCT	C	CTCF CTCF-Cohesin	19.1819	-	EH38E2058481	chr2	185738868	185739211	PLS,CTCF-bound	chr2	185738868	185739211
G01-GEA258HI	Female	chr2	121531092	G	A	CTCF CTCF-Cohesin	19.1562	-	EH38E2029391	chr2	121530900	121531247	PLS,CTCF-bound	chr2	121530900	121531247
3C554	Male	chr2	204325587	C	T	CTCF CTCF-Cohesin	19.1121	-	EH38E2067875	chr2	204325423	204325767	CTCF-only,CTCF-bound	chr2	204325423	204325767
3C139	Male	chr11	7892961	T	C	CTCF CTCF-Cohesin	19.0882	-	EH38E1518118	chr11	7892799	7893149	dELS,CTCF-bound	chr11	7892799	7893149
G01-GEA074HI	Male	chr1	235417295	G	A	CTCF CTCF-Cohesin	19.0678	-	EH38E1434303	chr1	235417043	235417375	dELS,CTCF-bound	chr1	235417043	235417375
G01-GEA186HI	Female	chr8	26046688	T	C	CTCF CTCF-Cohesin	18.8763	-	EH38E2618709	chr8	26046575	26046846	pELS,CTCF-bound	chr8	26046575	26046846
3D628	Male	chr2	218292605	G	T	CTCF CTCF-Cohesin	18.8548	-	EH38E2075278	chr2	218292406	218292745	PLS,CTCF-bound	chr2	218292406	218292745
3C142	Female	chr8	73673175	C	T	CTCF CTCF-Cohesin	18.8382	-	EH38E2640445	chr8	73673068	73673348	dELS,CTCF-bound	chr8	73673068	73673348
G01-GEA249HI	Male	chr17	75060172	C	T	CTCF CTCF-Cohesin	18.6635	-	EH38E1885539	chr17	75059882	75060191	pELS,CTCF-bound	chr17	75059882	75060191
3E473	Male	chr20	4249699	A	T	CTCF CTCF-Cohesin	18.5243	-	EH38E2094172	chr20	4249518	4249866	pELS,CTCF-bound	chr20	4249518	4249866
G01-GEA139HI	Male	chr20	45362971	G	A	CTCF CTCF-Cohesin	18.3474	-	EH38E2115508	chr20	45362969	45363316	PLS,CTCF-bound	chr20	45362969	45363316
3C554	Male	chr12	71938953	C	G	CTCF CTCF-Cohesin	18.3146	-	EH38E1624271	chr12	71938743	71939092	PLS,CTCF-bound	chr12	71938743	71939092
G01-GEA217HI	Male	chr3	149530849	AG	A	CTCF CTCF-Cohesin	18.2805	-	EH38E2247298	chr3	149530758	149530922	dELS,CTCF-bound	chr3	149530758	149530922
G01-GEA139HI	Male	chr9	76403480	A	G	CTCF CTCF-Cohesin	18.2125	+	EH38E2698514	chr9	76403380	76403710	dELS,CTCF-bound	chr9	76403380	76403710
G01-GEA149HI	Male	chr3	14439662	TGCCAAGGAAAACA	T	E4 Multi-tissue	18.1022	-	EH38E2180869	chr3	14439525	14439864	dELS,CTCF-bound	chr3	14439525	14439864
3B479	Male	chr2	237475597	G	A	CTCF CTCF-Cohesin	17.9553	-	EH38E2087376	chr2	237475319	237475669	dELS,CTCF-bound	chr2	237475319	237475669
G01-GEA065HI	Male	chr7	79177046	ACTGAAG	A	CTCF CTCF-Cohesin	17.9093	-	EH38E2566019	chr7	79176909	79177195	DNase-H3K4me3,CTCF-bound	chr7	79176909	79177195
3C572	Male	chr15	68155156	G	A	CTCF CTCF-Cohesin	17.8183	-	EH38E1772881	chr15	68154978	68155282	dELS,CTCF-bound	chr15	68154978	68155282
G01-GEA149HI	Male	chr5	138032842	G	C	CTCF CTCF-Cohesin	17.6562	+	EH38E2412334	chr5	138032635	138032888	PLS,CTCF-bound	chr5	138032635	138032888
G01-GEA154HI	Male	chr16	67160178	C	A	CTCF CTCF-Cohesin	17.656	-	EH38E1822670	chr16	67160146	67160469	PLS,CTCF-bound	chr16	67160146	67160469
5G257	Male	chr1	235093469	C	T	CTCF CTCF-Cohesin	17.6043	-	EH38E1434091	chr1	235093385	235093541	dELS,CTCF-bound	chr1	235093385	235093541
3B571	Female	chr13	37870449	G	A	CTCF CTCF-Cohesin	17.5904	-	EH38E1668815	chr13	37870274	37870613	PLS,CTCF-bound	chr13	37870274	37870613
G01-GEA114HI	Male	chr5	103587355	C	G	CTCF CTCF-Cohesin	17.5798	-	EH38E2395600	chr5	103587274	103587475	CTCF-only,CTCF-bound	chr5	103587274	103587475
G01-GEA241HI	Male	chr6	25070956	G	T	CTCF CTCF-Cohesin	17.4418	-	EH38E2454990	chr6	25070755	25071095	dELS,CTCF-bound	chr6	25070755	25071095
5F620	Male	chr15	70098043	CTT	C	CTCF CTCF-Cohesin	17.413	-	EH38E1774491	chr15	70097803	70098149	PLS,CTCF-bound	chr15	70097803	70098149
G01-GEA185HI	Female	chr20	6178724	C	A	CTCF CTCF-Cohesin	17.386	-	EH38E2095412	chr20	6178605	6178862	CTCF-only,CTCF-bound	chr20	6178605	6178862
G01-GEA065HI	Male	chr10	11758103	C	T	CTCF CTCF-Cohesin	17.3591	-	EH38E1448348	chr10	11758078	11758371	dELS,CTCF-bound	chr10	11758078	11758371
3D628	Male	chr8	119767943	G	A	CTCF CTCF-Cohesin	17.3356	-	EH38E2660641	chr8	119767699	119768049	dELS,CTCF-bound	chr8	119767699	119768049
G01-GEA074HI	Male	chr1	25247927	G	A	CTCF CTCF-Cohesin	17.2865	-	EH38E1329418	chr1	25247771	25247951	PLS,CTCF-bound	chr1	25247771	25247951
G01-GEA003HI	Male	chr6	28124477	C	G	CTCF CTCF-Cohesin	17.2848	+	EH38E2457069	chr6	28124412	28124758	PLS,CTCF-bound	chr6	28124412	28124758
G01-GEA211HI	Male	chr10	5442255	G	A	CTCF CTCF-Cohesin	17.2044	-	EH38E1444326	chr10	5442090	5442434	dELS,CTCF-bound	chr10	5442090	5442434
G01-GEA278HI	Male	chr4	141346339	C	T	CTCF CTCF-Cohesin	16.9613	-	EH38E2331250	chr4	141346263	141346546	dELS,CTCF-bound	chr4	141346263	141346546
G01-GEA224HI	Female	chr19	29760265	C	T	CTCF CTCF-Cohesin	16.9315	-	EH38E1947854	chr19	29760116	29760455	DNase-H3K4me3,CTCF-bound	chr19	29760116	29760455
4B713	Male	chr16	85750321	G	A	CTCF CTCF-Cohesin	16.9162	+	EH38E1834750	chr16	85750202	85750547	pELS,CTCF-bound	chr16	85750202	85750547
3D632	Male	chr14	22471700	C	T	CTCF CTCF-Cohesin	16.7925	-	EH38E1702220	chr14	22471570	22471884	dELS,CTCF-bound	chr14	22471570	22471884
G01-GEA028HI	Male	chr12	93571634	G	A	CTCF CTCF-Cohesin	16.6414	-	EH38E1633547	chr12	93571493	93571840	PLS,CTCF-bound	chr12	93571493	93571840
G01-GEA003HI	Male	chr1	209602243	C	T	CTCF CTCF-Cohesin	16.625	-	EH38E1418475	chr1	209602195	209602348	CTCF-only,CTCF-bound	chr1	209602195	209602348
G01-GEA045HI	Male	chr10	61751124	G	A	CTCF CTCF-Cohesin	16.5635	-	EH38E1471712	chr10	61750965	61751312	dELS,CTCF-bound	chr10	61750965	61751312
G01-GEA229HI	Male	chr13	40777638	A	G	CTCF CTCF-Cohesin	16.5308	-	EH38E1670391	chr13	40777552	40777720	dELS,CTCF-bound	chr13	40777552	40777720
3C562	Male	chr11	129992575	G	A	CTCF CTCF-Cohesin	16.523	-	EH38E1582138	chr11	129992394	129992743	dELS,CTCF-bound	chr11	129992394	129992743
G01-GEA251HI	Male	chr3	52534030	CGGCGATGGCGGCGCCTTTCCCT	C	CTCF CTCF-Cohesin	16.5204	-	EH38E2202467	chr3	52533781	52534106	PLS,CTCF-bound	chr3	52533781	52534106
5G257	Male	chr3	154335117	C	T	CTCF CTCF-Cohesin	16.4178	-	EH38E2250305	chr3	154334991	154335165	CTCF-only,CTCF-bound	chr3	154334991	154335165
G01-GEA195HI	Male	chr4	10089637	C	T	CTCF CTCF-Cohesin	16.4119	-	EH38E2280726	chr4	10089318	10089663	dELS,CTCF-bound	chr4	10089318	10089663
G01-GEA264HI	Male	chr17	61399738	C	T	CTCF CTCF-Cohesin	16.3755	+	EH38E1876130	chr17	61399575	61399915	PLS,CTCF-bound	chr17	61399575	61399915
G01-GEA161HI	Male	chr5	141914252	GC	G	CTCF CTCF-Cohesin	16.3549	-	EH38E2415173	chr5	141914198	141914349	dELS,CTCF-bound	chr5	141914198	141914349
3C546	Male	chr3	184242042	C	A	CTCF CTCF-Cohesin	16.2869	-	EH38E2264262	chr3	184241829	184242179	pELS,CTCF-bound	chr3	184241829	184242179
G01-GEA251HI	Male	chr12	55956262	A	C	E4 Multi-tissue	16.2777	-	EH38E1615326	chr12	55956117	55956450	dELS,CTCF-bound	chr12	55956117	55956450
5L790	Male	chr3	27312271	A	T	CTCF CTCF-Cohesin	16.1297	-	EH38E2187138	chr3	27312141	27312490	dELS,CTCF-bound	chr3	27312141	27312490
G01-GEA065HI	Male	chr1	34681669	C	T	CTCF CTCF-Cohesin	16.08	-	EH38E1336405	chr1	34681540	34681816	CTCF-only,CTCF-bound	chr1	34681540	34681816
G01-GEA310HI	Male	chr2	1855003	G	C	CTCF CTCF-Cohesin	16.0126	-	EH38E1967615	chr2	1854825	1855171	dELS,CTCF-bound	chr2	1854825	1855171
G01-GEA269HI	Male	chr6	99822915	T	C	CTCF CTCF-Cohesin	15.942	-	EH38E2488250	chr6	99822701	99823042	dELS,CTCF-bound	chr6	99822701	99823042
G01-GEA285HI	Male	chr17	48878352	G	A	CTCF CTCF-Cohesin	15.7929	+	EH38E1868497	chr17	48878219	48878464	CTCF-only,CTCF-bound	chr17	48878219	48878464
4B699	Male	chr18	49042098	C	G	CTCF CTCF-Cohesin	15.7788	-	EH38E1915610	chr18	49042019	49042238	dELS,CTCF-bound	chr18	49042019	49042238
5F620	Male	chr5	180209220	G	GC	CTCF CTCF-Cohesin	15.7388	-	EH38E2437437	chr5	180209056	180209351	PLS,CTCF-bound	chr5	180209056	180209351
4B716	Male	chr8	21922162	C	G	CTCF CTCF-Cohesin	15.7034	+	EH38E2615889	chr8	21922023	21922368	dELS,CTCF-bound	chr8	21922023	21922368
G01-GEA281HI	Male	chr10	133257695	G	A	CTCF CTCF-Cohesin	15.6708	-	EH38E1513014	chr10	133257477	133257827	PLS,CTCF-bound	chr10	133257477	133257827
G01-GEA285HI	Male	chr8	37851619	G	A	CTCF CTCF-Cohesin	15.5268	-	EH38E2624988	chr8	37851501	37851749	pELS,CTCF-bound	chr8	37851501	37851749
G01-GEA045HI	Male	chr16	1863816	C	G	CTCF CTCF-Cohesin	15.4881	-	EH38E1796099	chr16	1863745	1863977	DNase-H3K4me3,CTCF-bound	chr16	1863745	1863977
G01-GEA139HI	Male	chr2	85285645	C	T	CTCF CTCF-Cohesin	15.3874	-	EH38E2013592	chr2	85285460	85285804	dELS,CTCF-bound	chr2	85285460	85285804
G01-GEA271HI	Male	chr10	97025822	G	A	CTCF CTCF-Cohesin	15.3399	-	EH38E1491509	chr10	97025694	97025941	dELS,CTCF-bound	chr10	97025694	97025941
G01-GEA283HI	Male	chr1	156194064	G	A	CTCF CTCF-Cohesin	15.2279	-	EH38E1387766	chr1	156193813	156194163	PLS,CTCF-bound	chr1	156193813	156194163
G01-GEA154HI	Male	chr22	20507891	C	T	CTCF CTCF-Cohesin	15.2002	+	EH38E2150668	chr22	20507865	20508116	pELS,CTCF-bound	chr22	20507865	20508116
G01-GEA015HI	Male	chr7	81499826	C	T	CTCF CTCF-Cohesin	15.1057	-	EH38E2567267	chr7	81499562	81499904	dELS,CTCF-bound	chr7	81499562	81499904
G01-GEA101HI	Male	chr1	58899160	C	T	E12 Erythroblast-like	15.0784	-	EH38E1351734	chr1	58898963	58899310	dELS,CTCF-bound	chr1	58898963	58899310
G01-GEA288HI	Male	chr14	52730627	C	G	CTCF CTCF-Cohesin	15.0648	+	EH38E1714370	chr14	52730594	52730749	pELS,CTCF-bound	chr14	52730594	52730749
4B696	Male	chr6	99119628	C	T	CTCF CTCF-Cohesin	15.0562	-	EH38E2488006	chr6	99119407	99119757	dELS,CTCF-bound	chr6	99119407	99119757
G01-GEA292HI	Male	chr2	203650859	A	G	CTCF CTCF-Cohesin	15.0204	+	EH38E2067357	chr2	203650793	203651069	dELS,CTCF-bound	chr2	203650793	203651069
G01-GEA096HI	Male	chr3	82133185	C	A	CTCF CTCF-Cohesin	14.8201	-	EH38E2217735	chr3	82133041	82133304	dELS,CTCF-bound	chr3	82133041	82133304
3C573	Male	chr15	51621999	G	A	CTCF CTCF-Cohesin	14.7872	-	EH38E1761988	chr15	51621925	51622075	pELS,CTCF-bound	chr15	51621925	51622075
G01-GEA295HI	Male	chr1	161020775	T	G	CTCF CTCF-Cohesin	14.7549	-	EH38E1390973	chr1	161020707	161021006	pELS,CTCF-bound	chr1	161020707	161021006
5L790	Male	chr5	138133631	C	A	CTCF CTCF-Cohesin	14.7382	-	EH38E2412386	chr5	138133463	138133798	dELS,CTCF-bound	chr5	138133463	138133798
3E480	Male	chr4	7719762	G	T	CTCF CTCF-Cohesin	14.6757	-	EH38E2279308	chr4	7719586	7719921	DNase-H3K4me3,CTCF-bound	chr4	7719586	7719921
G01-GEA140HI	Male	chr2	236168342	G	T	CTCF CTCF-Cohesin	14.6568	+	EH38E2086317	chr2	236168311	236168627	PLS,CTCF-bound	chr2	236168311	236168627
3C565	Male	chr4	175892122	C	T	CTCF CTCF-Cohesin	14.5256	-	EH38E2345613	chr4	175891800	175892150	dELS,CTCF-bound	chr4	175891800	175892150
4B693	Male	chr16	88505672	C	T	CTCF CTCF-Cohesin	14.5246	-	EH38E1837107	chr16	88505413	88505763	dELS,CTCF-bound	chr16	88505413	88505763
G01-GEA012HI	Female	chr3	8607719	C	T	CTCF CTCF-Cohesin	14.4091	+	EH38E2176550	chr3	8607501	8607850	dELS,CTCF-bound	chr3	8607501	8607850
G01-GEA163HI	Male	chr11	72414345	G	A	CTCF CTCF-Cohesin	14.3541	-	EH38E1550757	chr11	72414188	72414537	dELS,CTCF-bound	chr11	72414188	72414537
G01-GEA176HI	Male	chr7	149883584	C	T	CTCF CTCF-Cohesin	14.26	-	EH38E2600358	chr7	149883413	149883727	pELS,CTCF-bound	chr7	149883413	149883727
3E473	Male	chr12	120225162	A	AG	CTCF CTCF-Cohesin	14.158	+	EH38E1649728	chr12	120224962	120225163	pELS,CTCF-bound	chr12	120224962	120225163
G01-GEA334HI	Male	chr10	28939435	G	A	CTCF CTCF-Cohesin	14.1326	-	EH38E1457896	chr10	28939385	28939724	dELS,CTCF-bound	chr10	28939385	28939724
G01-GEA278HI	Male	chr20	35092862	C	G	CTCF CTCF-Cohesin	14.1009	-	EH38E2108920	chr20	35092695	35093045	PLS,CTCF-bound	chr20	35092695	35093045
3C544	Female	chr9	128686229	GCTTTCT	G	PC3 Polycomb	14.1002	+	EH38E2729771	chr9	128686102	128686311	pELS,CTCF-bound	chr9	128686102	128686311
G01-GEA249HI	Male	chr3	96814037	C	T	CTCF CTCF-Cohesin	13.9467	-	EH38E2220123	chr3	96813887	96814237	pELS,CTCF-bound	chr3	96813887	96814237
3C575	Male	chr9	116365374	G	A	E4 Multi-tissue	13.9419	-	EH38E2721601	chr9	116365235	116365539	dELS,CTCF-bound	chr9	116365235	116365539
G01-GEA305HI	Male	chr1	10530461	T	C	CTCF CTCF-Cohesin	13.9255	+	EH38E1318073	chr1	10530396	10530550	dELS,CTCF-bound	chr1	10530396	10530550
3E467	Female	chr7	92833970	G	C	CTCF CTCF-Cohesin	13.8323	-	EH38E2571767	chr7	92833828	92834176	PLS,CTCF-bound	chr7	92833828	92834176
G01-GEA152HI	Male	chr12	110888189	G	C	CTCF CTCF-Cohesin	13.7398	-	EH38E1644161	chr12	110888003	110888353	dELS,CTCF-bound	chr12	110888003	110888353
G01-GEA211HI	Male	chr7	2555975	TGCCTGTAATTCCA	T	CTCF CTCF-Cohesin	13.7083	+	EH38E2529685	chr7	2555675	2556023	PLS,CTCF-bound	chr7	2555675	2556023
G01-GEA143HI	Female	chr1	201309683	G	A	CTCF CTCF-Cohesin	13.6944	-	EH38E1411513	chr1	201309435	201309780	dELS,CTCF-bound	chr1	201309435	201309780
G01-GEA307HI	Female	chr17	32111541	C	T	CTCF CTCF-Cohesin	13.6007	-	EH38E1856558	chr17	32111453	32111799	pELS,CTCF-bound	chr17	32111453	32111799
G01-GEA180HI	Male	chr9	764213	A	G	CTCF CTCF-Cohesin	13.5033	-	EH38E2677266	chr9	764068	764416	dELS,CTCF-bound	chr9	764068	764416
3C554	Male	chr18	45723088	G	A	CTCF CTCF-Cohesin	13.4949	+	EH38E1913375	chr18	45722932	45723279	DNase-H3K4me3,CTCF-bound	chr18	45722932	45723279
3B331	Male	chr17	58631720	CTATCCCACTCGTGAGAGAACACAAA	C	CTCF CTCF-Cohesin	13.4849	-	EH38E1874285	chr17	58631560	58631908	PLS,CTCF-bound	chr17	58631560	58631908
3C560	Male	chr2	11693087	C	T	CTCF CTCF-Cohesin	13.4743	-	EH38E1973734	chr2	11693047	11693383	dELS,CTCF-bound	chr2	11693047	11693383
G01-GEA103HI	Male	chr11	122505922	ATGGT	A	CTCF CTCF-Cohesin	13.3554	-	EH38E1577351	chr11	122505597	122505943	dELS,CTCF-bound	chr11	122505597	122505943
G01-GEA220HI	Male	chr1	27388583	A	G	CTCF CTCF-Cohesin	13.2518	-	EH38E1331320	chr1	27388422	27388766	pELS,CTCF-bound	chr1	27388422	27388766
G01-GEA129HI	Male	chr4	56800341	T	C	CTCF CTCF-Cohesin	13.2323	-	EH38E2298852	chr4	56800138	56800480	dELS,CTCF-bound	chr4	56800138	56800480
G01-GEA024HI	Female	chr12	119667733	G	GC	CTCF CTCF-Cohesin	13.1413	-	EH38E1649354	chr12	119667707	119668057	PLS,CTCF-bound	chr12	119667707	119668057
G01-GEA214HI	Male	chr1	115642222	G	T	CTCF CTCF-Cohesin	13.1281	+	EH38E1378909	chr1	115642027	115642357	pELS,CTCF-bound	chr1	115642027	115642357
4B848	Male	chr22	45096443	C	G	CTCF CTCF-Cohesin	13.1248	-	EH38E2169208	chr22	45096296	45096613	CTCF-only,CTCF-bound	chr22	45096296	45096613
G01-GEA327HI	Male	chr1	207024489	C	T	E12 Erythroblast-like	13.1232	-	EH38E1416723	chr1	207024340	207024690	dELS,CTCF-bound	chr1	207024340	207024690
XH678	Male	chr1	10210353	G	C	CTCF CTCF-Cohesin	13.0569	-	EH38E1317823	chr1	10210271	10210621	pELS,CTCF-bound	chr1	10210271	10210621
3C559	Male	chr17	38867636	A	C	CTCF CTCF-Cohesin	12.997	-	EH38E1860404	chr17	38867488	38867829	dELS,CTCF-bound	chr17	38867488	38867829
3D317	Female	chr3	33440080	C	G	CTCF CTCF-Cohesin	12.9923	+	EH38E2190802	chr3	33440035	33440208	PLS,CTCF-bound	chr3	33440035	33440208
G01-GEA232HI	Male	chr19	17391226	G	A	CTCF CTCF-Cohesin	12.9604	-	EH38E1943374	chr19	17391038	17391387	pELS,CTCF-bound	chr19	17391038	17391387
G01-GEA219HI	Male	chr19	1180713	C	A	E4 Multi-tissue	12.9463	-	EH38E1930929	chr19	1180498	1180847	dELS,CTCF-bound	chr19	1180498	1180847
G01-GEA118HI	Female	chr2	676208	G	A	CTCF CTCF-Cohesin	12.9331	+	EH38E1966899	chr2	676110	676455	PLS,CTCF-bound	chr2	676110	676455
G01-GEA032HI	Female	chr22	30695013	C	T	CTCF CTCF-Cohesin	12.9132	+	EH38E2158077	chr22	30694732	30695075	PLS,CTCF-bound	chr22	30694732	30695075
G01-GEA334HI	Male	chr1	151281311	G	C	CTCF CTCF-Cohesin	12.8678	-	EH38E1384191	chr1	151281287	151281637	pELS,CTCF-bound	chr1	151281287	151281637
G01-GEA167HI	Male	chr11	59755823	A	T	E4 Multi-tissue	12.7965	-	EH38E1540602	chr11	59755784	59756010	pELS,CTCF-bound	chr11	59755784	59756010
3C545	Male	chr2	96816265	G	T	CTCF CTCF-Cohesin	12.7713	-	EH38E2016921	chr2	96816033	96816383	PLS,CTCF-bound	chr2	96816033	96816383
G01-GEA209HI	Male	chr12	104215742	G	T	CTCF CTCF-Cohesin	12.7506	-	EH38E1639217	chr12	104215584	104215929	PLS,CTCF-bound	chr12	104215584	104215929
2K890	Male	chr14	77800536	T	C	CTCF CTCF-Cohesin	12.719	-	EH38E1730424	chr14	77800301	77800597	pELS,CTCF-bound	chr14	77800301	77800597
G01-GEA258HI	Female	chr17	7615030	C	A	CTCF CTCF-Cohesin	12.5746	-	EH38E1844553	chr17	7614963	7615309	pELS,CTCF-bound	chr17	7614963	7615309
4B693	Male	chr13	22926493	G	A	CTCF CTCF-Cohesin	12.5618	+	EH38E1659866	chr13	22926280	22926629	dELS,CTCF-bound	chr13	22926280	22926629
G01-GEA169HI	Male	chr21	45152488	C	G	CTCF CTCF-Cohesin	12.4842	-	EH38E2146785	chr21	45152270	45152616	dELS,CTCF-bound	chr21	45152270	45152616
G01-GEA176HI	Male	chr8	27614862	T	TGGGGGCGCCG	CTCF CTCF-Cohesin	12.404	-	EH38E2619771	chr8	27614645	27614991	pELS,CTCF-bound	chr8	27614645	27614991
G01-GEA176HI	Male	chr5	169980789	C	T	CTCF CTCF-Cohesin	12.3874	-	EH38E2430374	chr5	169980637	169980843	PLS,CTCF-bound	chr5	169980637	169980843
G01-GEA105HI	Male	chr11	1262739	CCGCCTCCTGTCCCGCCTCCTGTCCCGCCTCCTGTCG	C	P Promoter	12.3095	-	EH38E1514383	chr11	1262584	1262932	dELS,CTCF-bound	chr11	1262584	1262932
G01-GEA124HI	Male	chr3	64484600	G	C	CTCF CTCF-Cohesin	12.2527	-	EH38E2209593	chr3	64484421	64484759	dELS,CTCF-bound	chr3	64484421	64484759
G01-GEA023HI	Male	chr19	48675572	C	A	CTCF CTCF-Cohesin	12.2511	-	EH38E1960196	chr19	48675381	48675721	dELS,CTCF-bound	chr19	48675381	48675721
G01-GEA292HI	Male	chr2	86393873	A	C	E4 Multi-tissue	12.1732	-	EH38E2014631	chr2	86393660	86394010	dELS,CTCF-bound	chr2	86393660	86394010
G01-GEA263HI	Female	chr14	81990463	G	A	CTCF CTCF-Cohesin	12.1665	-	EH38E1732098	chr14	81990318	81990621	dELS,CTCF-bound	chr14	81990318	81990621
G01-GEA012HI	Female	chr7	95545173	C	A	CTCF CTCF-Cohesin	12.1652	-	EH38E2573115	chr7	95545059	95545269	dELS,CTCF-bound	chr7	95545059	95545269
G01-GEA096HI	Male	chr20	48620661	C	A	CTCF CTCF-Cohesin	12.1546	-	EH38E2117983	chr20	48620476	48620825	dELS,CTCF-bound	chr20	48620476	48620825
G01-GEA105HI	Male	chr14	99995932	T	C	CTCF CTCF-Cohesin	12.1392	+	EH38E1741926	chr14	99995740	99996079	dELS,CTCF-bound	chr14	99995740	99996079
G01-GEA163HI	Male	chr17	62968672	C	CT	CTCF CTCF-Cohesin	12.0639	-	EH38E1877115	chr17	62968473	62968813	PLS,CTCF-bound	chr17	62968473	62968813
G01-GEA147HI	Male	chr11	45146209	G	C	CTCF CTCF-Cohesin	11.9837	+	EH38E1536497	chr11	45146104	45146319	pELS,CTCF-bound	chr11	45146104	45146319
G01-GEA313HI	Male	chr20	38962717	C	T	CTCF CTCF-Cohesin	11.9533	-	EH38E2111989	chr20	38962487	38962780	PLS,CTCF-bound	chr20	38962487	38962780
G01-GEA114HI	Male	chr2	150486226	C	CGCGTCGCCTCTGG	CTCF CTCF-Cohesin	11.9429	+	EH38E2040964	chr2	150486104	150486431	pELS,CTCF-bound	chr2	150486104	150486431
G01-GEA182HI	Male	chr9	35259041	G	A	CTCF CTCF-Cohesin	11.8933	+	EH38E2691657	chr9	35258883	35259172	dELS,CTCF-bound	chr9	35258883	35259172
3C563	Male	chr5	150541074	A	G	E4 Multi-tissue	11.8807	-	EH38E2421123	chr5	150540958	150541298	dELS,CTCF-bound	chr5	150540958	150541298
G01-GEA283HI	Male	chr17	82231075	A	G	CTCF CTCF-Cohesin	11.8772	-	EH38E1893156	chr17	82230868	82231212	pELS,CTCF-bound	chr17	82230868	82231212
G01-GEA262HI	Female	chr14	74612771	G	A	CTCF CTCF-Cohesin	11.8714	-	EH38E1727950	chr14	74612541	74612891	pELS,CTCF-bound	chr14	74612541	74612891
3C145	Female	chr2	165953364	C	A	CTCF CTCF-Cohesin	11.8678	+	EH38E2048308	chr2	165953281	165953553	pELS,CTCF-bound	chr2	165953281	165953553
G01-GEA207HI	Male	chr1	33431066	C	T	CTCF CTCF-Cohesin	11.8453	-	EH38E1336002	chr1	33430926	33431275	dELS,CTCF-bound	chr1	33430926	33431275
G01-GEA023HI	Male	chr14	54348198	T	C	CTCF CTCF-Cohesin	11.7987	-	EH38E1715259	chr14	54348019	54348365	dELS,CTCF-bound	chr14	54348019	54348365
3B479	Male	chr14	105398617	G	A	CTCF CTCF-Cohesin	11.7441	-	EH38E1746744	chr14	105398317	105398655	PLS,CTCF-bound	chr14	105398317	105398655
3D317	Female	chr15	64740685	G	C	CTCF CTCF-Cohesin	11.729	-	EH38E1770155	chr15	64740459	64740793	dELS,CTCF-bound	chr15	64740459	64740793
4B713	Male	chr6	33711840	G	A	CTCF CTCF-Cohesin	11.6892	-	EH38E2460910	chr6	33711585	33711927	PLS,CTCF-bound	chr6	33711585	33711927
G01-GEA220HI	Male	chr14	64465496	T	C	CTCF CTCF-Cohesin	11.6811	+	EH38E1721112	chr14	64465254	64465601	PLS,CTCF-bound	chr14	64465254	64465601
G01-GEA248HI	Male	chr2	149329862	G	C	CTCF CTCF-Cohesin	11.6648	-	EH38E2040316	chr2	149329687	149329893	PLS,CTCF-bound	chr2	149329687	149329893
5L790	Male	chr1	44739649	CCA	C	CTCF CTCF-Cohesin	11.5397	+	EH38E1343618	chr1	44739546	44739896	PLS,CTCF-bound	chr1	44739546	44739896
G01-GEA190HI	Male	chr19	57579066	AGCGGCCCGCGGAG	A	CTCF CTCF-Cohesin	11.4858	-	EH38E1965908	chr19	57578843	57579193	PLS,CTCF-bound	chr19	57578843	57579193
G01-GEA239HI	Male	chr11	62556733	TGACTCACTCTTCCTGCAGGCAGAGGAA	T	E4 Multi-tissue	11.4756	-	EH38E1542669	chr11	62556516	62556859	dELS,CTCF-bound	chr11	62556516	62556859
G01-GEA206HI	Male	chr9	136539928	C	T	E4 Multi-tissue	11.4716	-	EH38E2736777	chr9	136539693	136540030	dELS,CTCF-bound	chr9	136539693	136540030
G01-GEA218HI	Male	chr11	112555901	T	C	CTCF CTCF-Cohesin	11.4695	-	EH38E1570100	chr11	112555735	112556052	CTCF-only,CTCF-bound	chr11	112555735	112556052
G01-GEA090HI	Male	chr20	25000351	G	A	TF3 FOXA1 / AR / ESR1	11.4329	-	EH38E2105113	chr20	25000326	25000676	dELS,CTCF-bound	chr20	25000326	25000676
G01-GEA003HI	Male	chr22	42296736	A	T	CTCF CTCF-Cohesin	11.4241	+	EH38E2167033	chr22	42296434	42296769	dELS,CTCF-bound	chr22	42296434	42296769
G01-GEA038HI	Male	chr22	50628109	G	A	CTCF CTCF-Cohesin	11.3871	-	EH38E2173319	chr22	50628069	50628417	PLS,CTCF-bound	chr22	50628069	50628417
G01-GEA278HI	Male	chr16	77212623	G	T	CTCF CTCF-Cohesin	11.3654	+	EH38E1828839	chr16	77212532	77212698	dELS,CTCF-bound	chr16	77212532	77212698
3G089	Male	chr12	5648942	T	G	CTCF CTCF-Cohesin	11.2499	-	EH38E1589320	chr12	5648751	5649060	CTCF-only,CTCF-bound	chr12	5648751	5649060
G01-GEA140HI	Male	chr2	36357784	C	T	CTCF CTCF-Cohesin	11.1874	+	EH38E1987421	chr2	36357591	36357792	pELS,CTCF-bound	chr2	36357591	36357792
G01-GEA118HI	Female	chr18	48412564	G	A	CTCF CTCF-Cohesin	11.0909	-	EH38E1914868	chr18	48412394	48412671	CTCF-only,CTCF-bound	chr18	48412394	48412671
G01-GEA207HI	Male	chr2	111887906	G	T	CTCF CTCF-Cohesin	11.0627	-	EH38E2024977	chr2	111887801	111888128	pELS,CTCF-bound	chr2	111887801	111888128
G01-GEA124HI	Male	chr15	89496433	C	T	CTCF CTCF-Cohesin	11.0074	-	EH38E1786748	chr15	89496261	89496569	PLS,CTCF-bound	chr15	89496261	89496569
G01-GEA217HI	Male	chr7	113118644	T	C	CTCF CTCF-Cohesin	10.9919	+	EH38E2582584	chr7	113118445	113118795	PLS,CTCF-bound	chr7	113118445	113118795
3B479	Male	chr4	62709838	G	T	CTCF CTCF-Cohesin	10.9853	-	EH38E2300188	chr4	62709752	62709930	dELS,CTCF-bound	chr4	62709752	62709930
G01-GEA289HI	Female	chr6	36840033	C	T	CTCF CTCF-Cohesin	10.9843	-	EH38E2463637	chr6	36839928	36840191	PLS,CTCF-bound	chr6	36839928	36840191
5L790	Male	chr19	5720692	C	G	CTCF CTCF-Cohesin	10.9724	-	EH38E1935247	chr19	5720489	5720738	PLS,CTCF-bound	chr19	5720489	5720738
G01-GEA003HI	Male	chr13	33285908	C	G	CTCF CTCF-Cohesin	10.9231	+	EH38E1666446	chr13	33285671	33286016	PLS,CTCF-bound	chr13	33285671	33286016
G01-GEA041HI	Female	chr1	39133258	C	T	CTCF CTCF-Cohesin	10.89	-	EH38E1339144	chr1	39132996	39133345	dELS,CTCF-bound	chr1	39132996	39133345
G01-GEA260HI	Male	chr2	234881891	C	T	CTCF CTCF-Cohesin	10.8591	-	EH38E2085381	chr2	234881687	234882035	dELS,CTCF-bound	chr2	234881687	234882035
G01-GEA271HI	Male	chr1	167721140	C	T	CTCF CTCF-Cohesin	10.8513	+	EH38E1394929	chr1	167721065	167721289	pELS,CTCF-bound	chr1	167721065	167721289
3D615	Male	chr15	73871268	C	T	E12 Erythroblast-like	10.819	-	EH38E1777097	chr15	73871087	73871430	dELS,CTCF-bound	chr15	73871087	73871430
3B334	Female	chr3	72888456	C	CCGCG	CTCF CTCF-Cohesin	10.8036	+	EH38E2214593	chr3	72888222	72888480	pELS,CTCF-bound	chr3	72888222	72888480
G01-GEA285HI	Male	chr1	22025494	GGCGGGGCATGACTTCCGGTTCCCGC	G	P Promoter	10.7865	-	EH38E1326684	chr1	22025308	22025571	PLS,CTCF-bound	chr1	22025308	22025571
3C567	Male	chr10	44959941	A	G	CTCF CTCF-Cohesin	10.7762	+	EH38E1464876	chr10	44959798	44960050	PLS,CTCF-bound	chr10	44959798	44960050
G01-GEA161HI	Male	chr5	45521277	T	C	CTCF CTCF-Cohesin	10.7662	+	EH38E2370210	chr5	45521135	45521407	dELS,CTCF-bound	chr5	45521135	45521407
G01-GEA217HI	Male	chr13	98485047	T	C	CTCF CTCF-Cohesin	10.7498	+	EH38E1691659	chr13	98484879	98485229	dELS,CTCF-bound	chr13	98484879	98485229
G01-GEA229HI	Male	chr2	96819420	G	A	CTCF CTCF-Cohesin	10.7433	+	EH38E2016930	chr2	96819240	96819590	dELS,CTCF-bound	chr2	96819240	96819590
G01-GEA129HI	Male	chr19	10505776	G	C	CTCF CTCF-Cohesin	10.6954	-	EH38E1938360	chr19	10505698	10505899	dELS,CTCF-bound	chr19	10505698	10505899
3B571	Female	chr16	19410709	G	A	CTCF CTCF-Cohesin	10.6954	+	EH38E1805876	chr16	19410475	19410824	PLS,CTCF-bound	chr16	19410475	19410824
G01-GEA262HI	Female	chr10	14960158	C	T	CTCF CTCF-Cohesin	10.6542	-	EH38E1450600	chr10	14959869	14960217	pELS,CTCF-bound	chr10	14959869	14960217
G01-GEA003HI	Male	chr18	61894406	C	G	CTCF CTCF-Cohesin	10.6514	-	EH38E1922196	chr18	61894274	61894618	pELS,CTCF-bound	chr18	61894274	61894618
G01-GEA288HI	Male	chr3	65412829	C	G	CTCF CTCF-Cohesin	10.6092	-	EH38E2210169	chr3	65412591	65412939	dELS,CTCF-bound	chr3	65412591	65412939
5L790	Male	chr13	43317216	G	A	E4 Multi-tissue	10.6074	-	EH38E1671973	chr13	43317027	43317377	dELS	chr13	43317027	43317377
3C562	Male	chr19	53866366	C	T	CTCF CTCF-Cohesin	10.5791	-	EH38E1963756	chr19	53866231	53866450	PLS,CTCF-bound	chr19	53866231	53866450
G01-GEA186HI	Female	chr9	97984493	G	C	E4 Multi-tissue	10.5749	+	EH38E2711216	chr9	97984493	97984653	pELS,CTCF-bound	chr9	97984493	97984653
2F867	Male	chr19	14505609	G	A	CTCF CTCF-Cohesin	10.5131	-	EH38E1941388	chr19	14505532	14505692	dELS,CTCF-bound	chr19	14505532	14505692
G01-GEA264HI	Male	chr10	43138131	C	T	CTCF CTCF-Cohesin	10.5064	-	EH38E1463748	chr10	43138000	43138194	pELS,CTCF-bound	chr10	43138000	43138194
G01-GEA337HI	Male	chr7	1170063	G	C	CTCF CTCF-Cohesin	10.5017	-	EH38E2528328	chr7	1169851	1170199	dELS,CTCF-bound	chr7	1169851	1170199
G01-GEA309HI	Male	chr17	57875620	C	CTT	CTCF CTCF-Cohesin	10.4935	-	EH38E1873643	chr17	57875356	57875677	dELS,CTCF-bound	chr17	57875356	57875677
4B702	Male	chr11	2527301	G	C	CTCF CTCF-Cohesin	10.4555	+	EH38E1515461	chr11	2527055	2527405	dELS,CTCF-bound	chr11	2527055	2527405
G01-GEA160HI	Male	chr7	69565008	C	A	CTCF CTCF-Cohesin	10.4498	-	EH38E2561243	chr7	69564856	69565206	dELS,CTCF-bound	chr7	69564856	69565206
3C139	Male	chr9	136792018	C	T	CTCF CTCF-Cohesin	10.4386	-	EH38E2737151	chr9	136791679	136792027	pELS,CTCF-bound	chr9	136791679	136792027
G01-GEA143HI	Female	chr1	2642746	C	A	CTCF CTCF-Cohesin	10.4257	-	EH38E1312163	chr1	2642487	2642835	dELS,CTCF-bound	chr1	2642487	2642835
G01-GEA053HI	Female	chr11	58788605	C	T	CTCF CTCF-Cohesin	10.422	-	EH38E1540131	chr11	58788368	58788654	dELS,CTCF-bound	chr11	58788368	58788654
3C560	Male	chr12	108563725	G	C	CTCF CTCF-Cohesin	10.3334	-	EH38E1642264	chr12	108563511	108563861	pELS,CTCF-bound	chr12	108563511	108563861
G01-GEA252HI	Male	chr12	58919607	A	G	E12 Erythroblast-like	10.3233	+	EH38E1617548	chr12	58919296	58919640	PLS,CTCF-bound	chr12	58919296	58919640
G01-GEA219HI	Male	chr7	45154790	G	A	CTCF CTCF-Cohesin	10.305	-	EH38E2553830	chr7	45154619	45154969	CTCF-only,CTCF-bound	chr7	45154619	45154969
G01-GEA185HI	Female	chr5	73792931	C	G	CTCF CTCF-Cohesin	10.3032	-	EH38E2382053	chr5	73792756	73793099	dELS,CTCF-bound	chr5	73792756	73793099
G01-GEA053HI	Female	chr8	10839809	G	A	CTCF CTCF-Cohesin	10.2969	+	EH38E2610368	chr8	10839745	10840095	PLS,CTCF-bound	chr8	10839745	10840095
G01-GEA032HI	Female	chr12	116559922	A	G	E4 Multi-tissue	10.2801	-	EH38E1647791	chr12	116559779	116560105	pELS,CTCF-bound	chr12	116559779	116560105
G01-GEA266HI	Male	chr9	97598874	A	C	CTCF CTCF-Cohesin	10.2325	-	EH38E2710933	chr9	97598734	97599041	dELS,CTCF-bound	chr9	97598734	97599041
G01-GEA191HI	Male	chr4	10165018	A	C	CTCF CTCF-Cohesin	10.2242	-	EH38E2280814	chr4	10164935	10165136	CTCF-only,CTCF-bound	chr4	10164935	10165136
3B331	Male	chr11	85664265	T	C	CTCF CTCF-Cohesin	10.1959	-	EH38E1558122	chr11	85664127	85664476	pELS,CTCF-bound	chr11	85664127	85664476
G01-GEA211HI	Male	chr1	247078977	C	A	CTCF CTCF-Cohesin	10.1795	-	EH38E1440238	chr1	247078681	247079031	PLS,CTCF-bound	chr1	247078681	247079031
3C572	Male	chr12	62260222	T	TG	CTCF CTCF-Cohesin	10.168	-	EH38E1618376	chr12	62260092	62260442	PLS,CTCF-bound	chr12	62260092	62260442
G01-GEA182HI	Male	chr2	42928743	A	ATATGGG	CTCF CTCF-Cohesin	10.1547	-	EH38E1992049	chr2	42928599	42928935	dELS,CTCF-bound	chr2	42928599	42928935
G01-GEA158HI	Male	chr6	39088514	G	T	CTCF CTCF-Cohesin	10.1365	-	EH38E2465375	chr6	39088328	39088641	dELS,CTCF-bound	chr6	39088328	39088641
G01-GEA337HI	Male	chr17	74368447	G	T	CTCF CTCF-Cohesin	10.1341	-	EH38E1884893	chr17	74368278	74368622	pELS,CTCF-bound	chr17	74368278	74368622
G01-GEA158HI	Male	chr1	25695261	G	A	CTCF CTCF-Cohesin	10.1326	+	EH38E1329774	chr1	25695055	25695404	dELS,CTCF-bound	chr1	25695055	25695404
G01-GEA001HI	Male	chr16	78099651	G	T	CTCF CTCF-Cohesin	10.1295	-	EH38E1829328	chr16	78099328	78099678	PLS,CTCF-bound	chr16	78099328	78099678
G01-GEA090HI	Male	chr3	188951072	T	G	E4 Multi-tissue	10.1069	-	EH38E2267864	chr3	188950823	188951173	dELS,CTCF-bound	chr3	188950823	188951173
G01-GEA143HI	Female	chr19	2337536	G	C	CTCF CTCF-Cohesin	10.1059	-	EH38E1932309	chr19	2337328	2337662	dELS,CTCF-bound	chr19	2337328	2337662
5L790	Male	chr17	76839838	GT	G	PC4 Polycomb / Bivalent stem cell Enh	10.1042	+	EH38E1887469	chr17	76839771	76840121	dELS,CTCF-bound	chr17	76839771	76840121
G01-GEA209HI	Male	chr15	66707564	GCTC	G	CTCF CTCF-Cohesin	10.0963	-	EH38E1771640	chr15	66707456	66707759	dELS,CTCF-bound	chr15	66707456	66707759
G01-GEA309HI	Male	chr6	24357912	G	T	CTCF CTCF-Cohesin	10.0726	+	EH38E2454459	chr6	24357838	24358188	PLS,CTCF-bound	chr6	24357838	24358188
G01-GEA032HI	Female	chr1	76868268	G	C	CTCF CTCF-Cohesin	10.0227	-	EH38E1360241	chr1	76868208	76868558	pELS,CTCF-bound	chr1	76868208	76868558
G01-GEA296HI	Male	chr6	45608054	G	A	E4 Multi-tissue	10.0094	-	EH38E2470230	chr6	45607835	45608185	dELS,CTCF-bound	chr6	45607835	45608185
G01-GEA043HI	Male	chr11	70568840	GC	G	CTCF CTCF-Cohesin	9.99494	+	EH38E1549705	chr11	70568589	70568935	dELS,CTCF-bound	chr11	70568589	70568935
3E465	Male	chr1	203674119	T	A	E5 B-cell-like	9.97463	-	EH38E1413833	chr1	203674063	203674413	dELS,CTCF-bound	chr1	203674063	203674413
3D629	Male	chr10	77943555	T	C	E4 Multi-tissue	9.96696	-	EH38E1481384	chr10	77943380	77943601	dELS	chr10	77943380	77943601
G01-GEA209HI	Male	chr17	36534971	TA	T	P Promoter	9.95061	-	EH38E1858928	chr17	36534778	36535128	PLS,CTCF-bound	chr17	36534778	36535128
3B331	Male	chr22	43007788	C	G	E12 Erythroblast-like	9.93823	-	EH38E2167745	chr22	43007637	43007981	dELS	chr22	43007637	43007981
G01-GEA009HI	Male	chr7	4682746	G	A	CTCF CTCF-Cohesin	9.89894	-	EH38E2531004	chr7	4682593	4682902	pELS,CTCF-bound	chr7	4682593	4682902
G01-GEA152HI	Male	chr14	93207078	C	G	CTCF CTCF-Cohesin	9.89735	-	EH38E1737614	chr14	93206944	93207294	PLS,CTCF-bound	chr14	93206944	93207294
G01-GEA176HI	Male	chr6	161234411	T	C	E4 Multi-tissue	9.86727	-	EH38E2521736	chr6	161234252	161234601	dELS	chr6	161234252	161234601
G01-GEA074HI	Male	chr12	18430623	G	C	CTCF CTCF-Cohesin	9.8497	+	EH38E1596470	chr12	18430505	18430750	CTCF-only,CTCF-bound	chr12	18430505	18430750
2F957	Male	chr6	157981728	G	C	CTCF CTCF-Cohesin	9.82019	-	EH38E2519416	chr6	157981475	157981820	pELS,CTCF-bound	chr6	157981475	157981820
4B848	Male	chr8	74984494	G	T	CTCF CTCF-Cohesin	9.814	+	EH38E2641067	chr8	74984368	74984716	PLS,CTCF-bound	chr8	74984368	74984716
3C145	Female	chr12	75820953	C	T	CTCF CTCF-Cohesin	9.80755	+	EH38E1625443	chr12	75820883	75821233	dELS,CTCF-bound	chr12	75820883	75821233
G01-GEA071HI	Female	chr16	85087043	G	A	CTCF CTCF-Cohesin	9.79264	+	EH38E1833862	chr16	85086700	85087050	dELS,CTCF-bound	chr16	85086700	85087050
2K890	Male	chr15	99704555	C	T	CTCF CTCF-Cohesin	9.77915	-	EH38E1792776	chr15	99704394	99704742	dELS,CTCF-bound	chr15	99704394	99704742
3E480	Male	chr6	76877133	C	T	CTCF CTCF-Cohesin	9.7568	-	EH38E2480409	chr6	76877030	76877268	dELS,CTCF-bound	chr6	76877030	76877268
G01-GEA251HI	Male	chr16	71289388	G	C	CTCF CTCF-Cohesin	9.75596	+	EH38E1825737	chr16	71289283	71289633	PLS,CTCF-bound	chr16	71289283	71289633
G01-GEA158HI	Male	chr12	113153450	TGGCGCTGAGTGGCTCAGGGACGGCTTCGGACC	T	CTCF CTCF-Cohesin	9.7554	-	EH38E1645581	chr12	113153270	113153598	dELS,CTCF-bound	chr12	113153270	113153598
G01-GEA252HI	Male	chr8	13566850	C	G	E4 Multi-tissue	9.73041	-	EH38E2612068	chr8	13566614	13566963	PLS,CTCF-bound	chr8	13566614	13566963
G01-GEA214HI	Male	chr1	153634479	G	C	P Promoter	9.71308	-	EH38E1385581	chr1	153634285	153634631	PLS,CTCF-bound	chr1	153634285	153634631
G01-GEA266HI	Male	chr8	28494237	C	G	CTCF CTCF-Cohesin	9.70097	-	EH38E2620441	chr8	28494015	28494365	PLS,CTCF-bound	chr8	28494015	28494365
G01-GEA302HI	Male	chr4	1763658	C	T	CTCF CTCF-Cohesin	9.697	-	EH38E2275055	chr4	1763463	1763798	dELS,CTCF-bound	chr4	1763463	1763798
4C200	Female	chr15	90185309	C	CG	CTCF CTCF-Cohesin	9.68426	+	EH38E1787278	chr15	90185102	90185447	pELS,CTCF-bound	chr15	90185102	90185447
G01-GEA147HI	Male	chr2	60550399	C	CCCCCCA	CTCF CTCF-Cohesin	9.67678	-	EH38E2001452	chr2	60550267	60550613	pELS,CTCF-bound	chr2	60550267	60550613
G01-GEA226HI	Female	chr16	83446966	A	G	CTCF CTCF-Cohesin	9.67551	-	EH38E1832604	chr16	83446819	83447107	CTCF-only,CTCF-bound	chr16	83446819	83447107
3B479	Male	chr7	76359448	C	T	CTCF CTCF-Cohesin	9.67331	-	EH38E2564792	chr7	76359217	76359566	pELS,CTCF-bound	chr7	76359217	76359566
5G257	Male	chr6	75749106	AGCGCGCCCTCCCTCCCGGAGC	A	CTCF CTCF-Cohesin	9.67282	+	EH38E2480144	chr6	75749011	75749360	PLS,CTCF-bound	chr6	75749011	75749360
G01-GEA114HI	Male	chr1	154937708	T	G	CTCF CTCF-Cohesin	9.66684	-	EH38E1386602	chr1	154937500	154937753	pELS,CTCF-bound	chr1	154937500	154937753
G01-GEA240HI	Female	chr20	44407570	C	T	E4 Multi-tissue	9.66674	-	EH38E2114739	chr20	44407434	44407782	pELS,CTCF-bound	chr20	44407434	44407782
G01-GEA204HI	Male	chr17	35448846	C	T	E4 Multi-tissue	9.64942	-	EH38E1858382	chr17	35448646	35448992	PLS,CTCF-bound	chr17	35448646	35448992
G01-GEA158HI	Male	chr17	34961196	A	G	CTCF CTCF-Cohesin	9.63631	+	EH38E1858072	chr17	34961109	34961310	PLS,CTCF-bound	chr17	34961109	34961310
3E465	Male	chr11	121671414	G	A	E12 Erythroblast-like	9.62953	-	EH38E1576770	chr11	121671252	121671601	dELS	chr11	121671252	121671601
G01-GEA296HI	Male	chr6	26189021	TGACGCTTGGCGCCACCCTTACCTA	T	CTCF CTCF-Cohesin	9.61795	-	EH38E2455837	chr6	26188943	26189293	PLS,CTCF-bound	chr6	26188943	26189293
G01-GEA180HI	Male	chr22	23787397	CGTGGCCTAGTGGGCGTGTCGGGT	C	P Promoter	9.60692	-	EH38E2152916	chr22	23787182	23787525	pELS,CTCF-bound	chr22	23787182	23787525
4B691	Female	chr1	24688725	C	G	CTCF CTCF-Cohesin	9.59202	-	EH38E1328874	chr1	24688605	24688887	dELS,CTCF-bound	chr1	24688605	24688887
G01-GEA307HI	Female	chr12	122437735	A	G	E4 Multi-tissue	9.5886	-	EH38E1651620	chr12	122437579	122437916	dELS	chr12	122437579	122437916
G01-GEA310HI	Male	chr2	223993817	G	A	CTCF CTCF-Cohesin	9.57526	-	EH38E2078730	chr2	223993677	223994009	dELS,CTCF-bound	chr2	223993677	223994009
G01-GEA059HI	Female	chr11	62959002	C	T	E4 Multi-tissue	9.54543	-	EH38E1543066	chr11	62958916	62959128	dELS	chr11	62958916	62959128
2F867	Male	chr1	53328151	C	G	CTCF CTCF-Cohesin	9.54457	+	EH38E1348141	chr1	53327938	53328288	PLS,CTCF-bound	chr1	53327938	53328288
G01-GEA305HI	Male	chr6	85642889	A	C	CTCF CTCF-Cohesin	9.53638	+	EH38E2483387	chr6	85642830	85643178	PLS,CTCF-bound	chr6	85642830	85643178
G01-GEA001HI	Male	chr3	8111251	GATTGGTAAA	G	E12 Erythroblast-like	9.52216	+	EH38E2176223	chr3	8111177	8111520	dELS,CTCF-bound	chr3	8111177	8111520
G01-GEA283HI	Male	chr2	168211341	CAT	C	E4 Multi-tissue	9.51418	-	EH38E2049137	chr2	168211169	168211510	dELS	chr2	168211169	168211510
3C545	Male	chr6	150395627	C	A	CTCF CTCF-Cohesin	9.50709	-	EH38E2514832	chr6	150395503	150395852	dELS,CTCF-bound	chr6	150395503	150395852
XA214	Female	chr1	6490653	G	A	CTCF CTCF-Cohesin	9.49666	+	EH38E1314514	chr1	6490451	6490787	PLS,CTCF-bound	chr1	6490451	6490787
G01-GEA288HI	Male	chr12	56118281	C	G	CTCF CTCF-Cohesin	9.49543	-	EH38E1615487	chr12	56118000	56118350	PLS,CTCF-bound	chr12	56118000	56118350
G01-GEA307HI	Female	chr2	190180301	G	C	CTCF CTCF-Cohesin	9.48631	-	EH38E2060530	chr2	190180173	190180522	PLS,CTCF-bound	chr2	190180173	190180522
2F730	Male	chr6	24666977	TGCTCTCGGAAAACTGGTGCAGCTGCGCCGCAAGGGAGCCGCCGGGGCGGTGGGTGCGAAGCGCGCATGCGCGCTTCGTCACAAGGGTG	T	E5 B-cell-like	9.46721	-	EH38E2454637	chr6	24666835	24667185	PLS,CTCF-bound	chr6	24666835	24667185
3D317	Female	chr9	33161759	G	C	TF3 FOXA1 / AR / ESR1	9.46644	-	EH38E2690311	chr9	33161627	33161887	dELS,CTCF-bound	chr9	33161627	33161887
XH678	Male	chr17	2848972	C	T	CTCF CTCF-Cohesin	9.42971	-	EH38E1841283	chr17	2848704	2849048	dELS,CTCF-bound	chr17	2848704	2849048
G01-GEA129HI	Male	chr12	6766937	G	T	CTCF CTCF-Cohesin	9.4282	-	EH38E1590238	chr12	6766884	6767184	pELS,CTCF-bound	chr12	6766884	6767184
G01-GEA149HI	Male	chr17	4704003	G	C	CTCF CTCF-Cohesin	9.4226	+	EH38E1842566	chr17	4703753	4704007	pELS,CTCF-bound	chr17	4703753	4704007
G01-GEA176HI	Male	chr9	94603453	C	T	CTCF CTCF-Cohesin	9.40904	-	EH38E2708938	chr9	94603402	94603751	dELS,CTCF-bound	chr9	94603402	94603751
G01-GEA302HI	Male	chr3	9947294	C	A	CTCF CTCF-Cohesin	9.39816	-	EH38E2177481	chr3	9947160	9947505	PLS,CTCF-bound	chr3	9947160	9947505
G01-GEA192HI	Male	chr1	1292035	C	A	CTCF CTCF-Cohesin	9.38448	-	EH38E1310726	chr1	1291826	1292171	dELS,CTCF-bound	chr1	1291826	1292171
G01-GEA305HI	Male	chr11	130146463	A	T	CTCF CTCF-Cohesin	9.36621	-	EH38E1582284	chr11	130146362	130146695	dELS,CTCF-bound	chr11	130146362	130146695
G01-GEA334HI	Male	chr2	169131990	C	T	CTCF CTCF-Cohesin	9.35483	-	EH38E2049820	chr2	169131962	169132205	CTCF-only,CTCF-bound	chr2	169131962	169132205
3C559	Male	chr2	55168752	C	T	CTCF CTCF-Cohesin	9.34589	+	EH38E1999331	chr2	55168594	55168834	dELS,CTCF-bound	chr2	55168594	55168834
G01-GEA041HI	Female	chr11	47269578	ACTCCATCTCCCAGCGGGCGCCGCGG	A	E5 B-cell-like	9.33107	-	EH38E1538071	chr11	47269477	47269827	PLS,CTCF-bound	chr11	47269477	47269827
G01-GEA248HI	Male	chr11	63767592	G	A	E4 Multi-tissue	9.31179	-	EH38E1543415	chr11	63767434	63767774	pELS,CTCF-bound	chr11	63767434	63767774
G01-GEA211HI	Male	chr8	10850608	A	G	CTCF CTCF-Cohesin	9.29951	-	EH38E2610370	chr8	10850478	10850781	dELS,CTCF-bound	chr8	10850478	10850781
G01-GEA313HI	Male	chr9	107067983	CTG	C	TF3 FOXA1 / AR / ESR1	9.27955	-	EH38E2715204	chr9	107067776	107068097	dELS	chr9	107067776	107068097
G01-GEA207HI	Male	chr8	78805102	A	C	CTCF CTCF-Cohesin	9.27071	+	EH38E2642249	chr8	78805014	78805247	pELS,CTCF-bound	chr8	78805014	78805247
G01-GEA226HI	Female	chr3	180037216	C	G	CTCF CTCF-Cohesin	9.26654	+	EH38E2262138	chr3	180036912	180037261	PLS,CTCF-bound	chr3	180036912	180037261
4B848	Male	chr16	75110806	G	A	CTCF CTCF-Cohesin	9.2568	-	EH38E1827937	chr16	75110725	75110991	PLS,CTCF-bound	chr16	75110725	75110991
G01-GEA248HI	Male	chr11	63767587	AGG	A	CTCF CTCF-Cohesin	9.25337	-	EH38E1543415	chr11	63767434	63767774	pELS,CTCF-bound	chr11	63767434	63767774
G01-GEA070HI	Male	chr1	44005839	C	G	CTCF CTCF-Cohesin	9.22945	-	EH38E1343007	chr1	44005671	44006021	dELS,CTCF-bound	chr1	44005671	44006021
G01-GEA041HI	Female	chr1	39133255	C	T	CTCF CTCF-Cohesin	9.19948	-	EH38E1339144	chr1	39132996	39133345	dELS,CTCF-bound	chr1	39132996	39133345
G01-GEA074HI	Male	chr16	85196600	G	A	TF3 FOXA1 / AR / ESR1	9.17737	+	EH38E1833989	chr16	85196542	85196802	dELS	chr16	85196542	85196802
G01-GEA140HI	Male	chr8	11854162	A	G	E12 Erythroblast-like	9.15275	-	EH38E2611215	chr8	11853966	11854271	dELS,CTCF-bound	chr8	11853966	11854271
G01-GEA241HI	Male	chr6	75747563	G	GT	TF3 FOXA1 / AR / ESR1	9.12893	-	EH38E2480139	chr6	75747343	75747679	pELS,CTCF-bound	chr6	75747343	75747679
G01-GEA040HI	Male	chr1	31182653	G	C	CTCF CTCF-Cohesin	9.12533	-	EH38E1333941	chr1	31182329	31182673	dELS,CTCF-bound	chr1	31182329	31182673
G01-GEA071HI	Female	chr11	108121537	T	A	CTCF CTCF-Cohesin	9.11445	-	EH38E1567564	chr11	108121315	108121665	PLS,CTCF-bound	chr11	108121315	108121665
G01-GEA313HI	Male	chr17	45197968	C	T	CTCF CTCF-Cohesin	9.08118	-	EH38E1865843	chr17	45197813	45198159	dELS,CTCF-bound	chr17	45197813	45198159
5L790	Male	chr1	223731633	G	C	E4 Multi-tissue	9.06907	-	EH38E1426060	chr1	223731505	223731726	dELS,CTCF-bound	chr1	223731505	223731726
3A671	Female	chr1	68051682	G	A	CTCF CTCF-Cohesin	9.05677	-	EH38E1357465	chr1	68051561	68051910	PLS,CTCF-bound	chr1	68051561	68051910
G01-GEA182HI	Male	chr2	42928749	A	ATAT	CTCF CTCF-Cohesin	9.04419	-	EH38E1992049	chr2	42928599	42928935	dELS,CTCF-bound	chr2	42928599	42928935
G01-GEA206HI	Male	chr16	84145051	G	C	CTCF CTCF-Cohesin	9.01115	-	EH38E1832994	chr16	84145035	84145384	PLS,CTCF-bound	chr16	84145035	84145384
G01-GEA192HI	Male	chr1	224204971	G	A	E12 Erythroblast-like	9.00875	-	EH38E1426340	chr1	224204813	224205163	dELS	chr1	224204813	224205163
G01-GEA327HI	Male	chr22	41285540	T	C	E4 Multi-tissue	8.98242	-	EH38E2166184	chr22	41285401	41285750	pELS,CTCF-bound	chr22	41285401	41285750
G01-GEA015HI	Male	chr4	3387990	TGCTGGCTCTGTGTGTCCCTCTGAGGAAGTGTGTCCTGGCTCCTCGCCAC	T	E4 Multi-tissue	8.96759	-	EH38E2276420	chr4	3387954	3388290	dELS	chr4	3387954	3388290
G01-GEA147HI	Male	chr22	39994826	G	A	CTCF CTCF-Cohesin	8.94887	+	EH38E2165158	chr22	39994591	39994926	PLS,CTCF-bound	chr22	39994591	39994926
G01-GEA209HI	Male	chr19	13764190	A	G	CTCF CTCF-Cohesin	8.93198	+	EH38E1940684	chr19	13764170	13764336	pELS,CTCF-bound	chr19	13764170	13764336
G01-GEA041HI	Female	chr17	7614406	G	A	CTCF CTCF-Cohesin	8.89787	+	EH38E1844551	chr17	7614261	7614483	pELS,CTCF-bound	chr17	7614261	7614483
3E475	Male	chr1	46302146	G	C	CTCF CTCF-Cohesin	8.83528	+	EH38E1344600	chr1	46301983	46302282	pELS,CTCF-bound	chr1	46301983	46302282
G01-GEA241HI	Male	chr14	73490979	C	CCGG	CTCF CTCF-Cohesin	8.80332	-	EH38E1727179	chr14	73490753	73491103	PLS,CTCF-bound	chr14	73490753	73491103
XH678	Male	chr12	96399387	G	C	CTCF CTCF-Cohesin	8.80186	-	EH38E1635718	chr12	96399224	96399454	pELS,CTCF-bound	chr12	96399224	96399454
G01-GEA249HI	Male	chr19	6738632	A	G	CTCF CTCF-Cohesin	8.77738	-	EH38E1936052	chr19	6738465	6738814	pELS,CTCF-bound	chr19	6738465	6738814
G01-GEA167HI	Male	chr12	85425096	C	T	CTCF CTCF-Cohesin	8.76307	-	EH38E1629417	chr12	85424970	85425211	dELS,CTCF-bound	chr12	85424970	85425211
G01-GEA074HI	Male	chr1	83861039	G	A	P Promoter	8.75966	-	EH38E1362865	chr1	83860857	83861163	PLS,CTCF-bound	chr1	83860857	83861163
G01-GEA337HI	Male	chr3	118885074	CAGTA	C	CTCF CTCF-Cohesin	8.73134	-	EH38E2230351	chr3	118884742	118885091	DNase-H3K4me3,CTCF-bound	chr3	118884742	118885091
3D632	Male	chr11	397390	G	T	CTCF CTCF-Cohesin	8.73134	-	EH38E1513481	chr11	397257	397458	dELS,CTCF-bound	chr11	397257	397458
G01-GEA043HI	Male	chr17	64074903	T	C	E4 Multi-tissue	8.73009	-	EH38E1877953	chr17	64074773	64075123	dELS,CTCF-bound	chr17	64074773	64075123
G01-GEA266HI	Male	chr2	221716618	A	T	E4 Multi-tissue	8.71621	-	EH38E2077362	chr2	221716523	221716751	dELS	chr2	221716523	221716751
G01-GEA309HI	Male	chr1	168082439	TGTC	T	CTCF CTCF-Cohesin	8.71492	-	EH38E1395197	chr1	168082235	168082585	dELS,CTCF-bound	chr1	168082235	168082585
3C565	Male	chr2	231190664	G	C	CTCF CTCF-Cohesin	8.64058	-	EH38E2082576	chr2	231190608	231190792	dELS,CTCF-bound	chr2	231190608	231190792
4B691	Female	chr18	3247812	G	A	E4 Multi-tissue	8.6399	-	EH38E1895771	chr18	3247628	3247928	PLS,CTCF-bound	chr18	3247628	3247928
3C560	Male	chr3	125595647	T	C	CTCF CTCF-Cohesin	8.60773	+	EH38E2234527	chr3	125595384	125595733	pELS,CTCF-bound	chr3	125595384	125595733
3A671	Female	chr18	23192474	C	T	E4 Multi-tissue	8.60734	-	EH38E1903840	chr18	23192384	23192727	dELS,CTCF-bound	chr18	23192384	23192727
G01-GEA281HI	Male	chr9	14400823	G	C	CTCF CTCF-Cohesin	8.58585	+	EH38E2683222	chr9	14400660	14401009	pELS,CTCF-bound	chr9	14400660	14401009
3D612	Male	chr16	4476422	C	A	CTCF CTCF-Cohesin	8.58418	-	EH38E1798430	chr16	4476223	4476570	PLS,CTCF-bound	chr16	4476223	4476570
G01-GEA152HI	Male	chr1	42967299	G	A	E12 Erythroblast-like	8.58377	-	EH38E1342129	chr1	42967134	42967482	dELS,CTCF-bound	chr1	42967134	42967482
G01-GEA032HI	Female	chr9	133726517	CT	C	CTCF CTCF-Cohesin	8.54932	-	EH38E2734280	chr9	133726361	133726635	DNase-H3K4me3,CTCF-bound	chr9	133726361	133726635
3D616	Female	chr5	132422820	C	T	E12 Erythroblast-like	8.5364	-	EH38E2408500	chr5	132422670	132423019	dELS,CTCF-bound	chr5	132422670	132423019
3D632	Male	chr4	70705640	C	A	CTCF CTCF-Cohesin	8.52723	+	EH38E2302091	chr4	70705457	70705797	pELS,CTCF-bound	chr4	70705457	70705797
G01-GEA015HI	Male	chr11	114440081	C	T	E4 Multi-tissue	8.51141	-	EH38E1571464	chr11	114439854	114440203	PLS,CTCF-bound	chr11	114439854	114440203
G01-GEA279HI	Female	chr15	40874326	C	A	P Promoter	8.49711	-	EH38E1756255	chr15	40874127	40874474	PLS,CTCF-bound	chr15	40874127	40874474
3D632	Male	chr3	127791382	T	C	E4 Multi-tissue	8.48795	-	EH38E2235932	chr3	127791330	127791525	dELS,CTCF-bound	chr3	127791330	127791525
G01-GEA149HI	Male	chr3	46663279	G	C	E4 Multi-tissue	8.48779	-	EH38E2198357	chr3	46663077	46663427	dELS	chr3	46663077	46663427
G01-GEA271HI	Male	chr9	36136367	C	G	CTCF CTCF-Cohesin	8.44007	-	EH38E2692308	chr9	36136287	36136458	PLS,CTCF-bound	chr9	36136287	36136458
G01-GEA180HI	Male	chr5	172770728	C	G	CTCF CTCF-Cohesin	8.4134	-	EH38E2432315	chr5	172770578	172770925	pELS,CTCF-bound	chr5	172770578	172770925
G01-GEA104HI	Male	chr2	64653720	G	A	CTCF CTCF-Cohesin	8.40556	+	EH38E2003998	chr2	64653693	64654041	PLS,CTCF-bound	chr2	64653693	64654041
G01-GEA158HI	Male	chr1	163069348	C	A	CTCF CTCF-Cohesin	8.38893	-	EH38E1392515	chr1	163069183	163069532	PLS,CTCF-bound	chr1	163069183	163069532
5L790	Male	chr1	212791638	C	G	CTCF CTCF-Cohesin	8.38683	+	EH38E1420522	chr1	212791362	212791685	PLS,CTCF-bound	chr1	212791362	212791685
G01-GEA147HI	Male	chr6	170153244	C	T	E4 Multi-tissue	8.35368	-	EH38E2526806	chr6	170152985	170153321	dELS,CTCF-bound	chr6	170152985	170153321
3D616	Female	chr1	228082532	T	G	CTCF CTCF-Cohesin	8.34574	-	EH38E1428771	chr1	228082447	228082797	PLS,CTCF-bound	chr1	228082447	228082797
G01-GEA150HI	Male	chr9	97501212	CAG	C	CTCF CTCF-Cohesin	8.34353	+	EH38E2710838	chr9	97501188	97501370	PLS,CTCF-bound	chr9	97501188	97501370
G01-GEA218HI	Male	chr11	65540472	G	T	CTCF CTCF-Cohesin	8.33165	-	EH38E1545284	chr11	65540170	65540518	dELS,CTCF-bound	chr11	65540170	65540518
5L790	Male	chr22	40183456	G	A	CTCF CTCF-Cohesin	8.32568	+	EH38E2165293	chr22	40183270	40183609	dELS	chr22	40183270	40183609
G01-GEA208HI	Male	chr2	95207155	T	C	CTCF CTCF-Cohesin	8.3236	+	EH38E2016083	chr2	95206942	95207158	pELS,CTCF-bound	chr2	95206942	95207158
G01-GEA310HI	Male	chr13	72566092	A	C	CTCF CTCF-Cohesin	8.32256	-	EH38E1682315	chr13	72565970	72566172	DNase-H3K4me3,CTCF-bound	chr13	72565970	72566172
3E473	Male	chr8	119767915	G	A	CTCF CTCF-Cohesin	8.29411	-	EH38E2660641	chr8	119767699	119768049	dELS,CTCF-bound	chr8	119767699	119768049
3C560	Male	chr5	142713283	G	A	CTCF CTCF-Cohesin	8.25853	-	EH38E2415895	chr5	142713225	142713418	dELS,CTCF-bound	chr5	142713225	142713418
G01-GEA267HI	Male	chr8	105319659	C	G	CTCF CTCF-Cohesin	8.24416	+	EH38E2655065	chr8	105319332	105319675	PLS,CTCF-bound	chr8	105319332	105319675
3D612	Male	chr20	34872832	C	T	CTCF CTCF-Cohesin	8.23462	+	EH38E2108714	chr20	34872762	34873090	PLS,CTCF-bound	chr20	34872762	34873090
G01-GEA167HI	Male	chr6	155224206	T	G	E4 Multi-tissue	8.23135	-	EH38E2517547	chr6	155224048	155224398	dELS,CTCF-bound	chr6	155224048	155224398
3C139	Male	chr16	85753263	G	C	CTCF CTCF-Cohesin	8.22385	-	EH38E1834757	chr16	85753068	85753418	dELS,CTCF-bound	chr16	85753068	85753418
G01-GEA217HI	Male	chr9	132878319	C	T	P Promoter	8.21047	-	EH38E2733521	chr9	132878177	132878527	pELS,CTCF-bound	chr9	132878177	132878527
3E473	Male	chr1	109792313	T	G	CTCF CTCF-Cohesin	8.20753	-	EH38E1375118	chr1	109792139	109792457	dELS,CTCF-bound	chr1	109792139	109792457
G01-GEA015HI	Male	chr13	27403483	C	T	E6 Weak epithelial	8.19904	-	EH38E1662529	chr13	27403332	27403665	pELS,CTCF-bound	chr13	27403332	27403665
G01-GEA152HI	Male	chr13	44332076	T	G	E4 Multi-tissue	8.19615	-	EH38E1672670	chr13	44331980	44332326	dELS,CTCF-bound	chr13	44331980	44332326
2K890	Male	chr12	14554343	C	G	CTCF CTCF-Cohesin	8.18698	-	EH38E1594927	chr12	14554328	14554651	pELS,CTCF-bound	chr12	14554328	14554651
G01-GEA217HI	Male	chr16	11297645	A	G	E12 Erythroblast-like	8.18663	-	EH38E1801738	chr16	11297575	11297925	dELS,CTCF-bound	chr16	11297575	11297925
3C565	Male	chr12	45216462	G	C	CTCF CTCF-Cohesin	8.15328	-	EH38E1607183	chr12	45216450	45216655	pELS,CTCF-bound	chr12	45216450	45216655
G01-GEA103HI	Male	chr7	24757805	C	G	CTCF CTCF-Cohesin	8.12406	-	EH38E2540832	chr7	24757793	24758114	PLS,CTCF-bound	chr7	24757793	24758114
3D630	Male	chr17	15490848	C	T	E12 Erythroblast-like	8.11637	-	EH38E1848892	chr17	15490728	15491078	dELS	chr17	15490728	15491078
3C147	Male	chr16	87464859	T	C	E4 Multi-tissue	8.10863	-	EH38E1836169	chr16	87464643	87464985	dELS	chr16	87464643	87464985
G01-GEA148HI	Female	chr11	118690250	C	CT	CTCF CTCF-Cohesin	8.09726	-	EH38E1574379	chr11	118690077	118690382	pELS,CTCF-bound	chr11	118690077	118690382
G01-GEA264HI	Male	chr16	86517874	G	A	CTCF CTCF-Cohesin	8.09563	-	EH38E1835434	chr16	86517694	86518031	dELS,CTCF-bound	chr16	86517694	86518031
G01-GEA173HI	Male	chr17	29617224	C	G	CTCF CTCF-Cohesin	8.09324	-	EH38E1854981	chr17	29617103	29617452	dELS,CTCF-bound	chr17	29617103	29617452
G01-GEA309HI	Male	chr12	111597620	C	G	CTCF CTCF-Cohesin	8.0637	+	EH38E1644638	chr12	111597359	111597695	pELS,CTCF-bound	chr12	111597359	111597695
G01-GEA204HI	Male	chr22	17158717	TG	T	CTCF CTCF-Cohesin	8.05773	-	EH38E2148470	chr22	17158676	17158991	pELS,CTCF-bound	chr22	17158676	17158991
3B479	Male	chr14	102510068	G	A	CTCF CTCF-Cohesin	8.05363	-	EH38E1744051	chr14	102509748	102510095	PLS,CTCF-bound	chr14	102509748	102510095
G01-GEA012HI	Female	chr4	168831971	C	T	P Promoter	8.04163	-	EH38E2342798	chr4	168831926	168832194	PLS,CTCF-bound	chr4	168831926	168832194
G01-GEA327HI	Male	chr5	177087129	G	A	CTCF CTCF-Cohesin	8.02467	-	EH38E2435322	chr5	177087075	177087425	pELS,CTCF-bound	chr5	177087075	177087425
G01-GEA167HI	Male	chr2	212940966	C	A	E4 Multi-tissue	8.00661	-	EH38E2071957	chr2	212940857	212941193	dELS,CTCF-bound	chr2	212940857	212941193
3B331	Male	chr15	57581000	C	T	CTCF CTCF-Cohesin	8.00209	+	EH38E1764956	chr15	57580977	57581153	dELS,CTCF-bound	chr15	57580977	57581153
1D466	Female	chr14	77181665	G	A	CTCF CTCF-Cohesin	7.98331	-	EH38E1729991	chr14	77181513	77181863	PLS,CTCF-bound	chr14	77181513	77181863
1D466	Female	chr2	32356961	ACGCGCGAGCCCTCCCGCGCATGCTCCACC	A	E5 B-cell-like	7.97993	-	EH38E1985937	chr2	32356867	32357217	PLS,CTCF-bound	chr2	32356867	32357217
G01-GEA235HI	Male	chr21	31580953	T	A	CTCF CTCF-Cohesin	7.96522	-	EH38E2136845	chr21	31580800	31581136	CTCF-only,CTCF-bound	chr21	31580800	31581136
4B702	Male	chr11	66045311	G	A	CTCF CTCF-Cohesin	7.96364	-	EH38E1545821	chr11	66045133	66045482	pELS,CTCF-bound	chr11	66045133	66045482
G01-GEA045HI	Male	chr11	64878608	G	A	CTCF CTCF-Cohesin	7.95039	-	EH38E1544548	chr11	64878607	64878957	PLS,CTCF-bound	chr11	64878607	64878957
G01-GEA159HI	Female	chr7	4792257	G	A	CTCF CTCF-Cohesin	7.95022	-	EH38E2531120	chr7	4792130	4792477	dELS,CTCF-bound	chr7	4792130	4792477
G01-GEA009HI	Male	chr1	156213286	G	A	P Promoter	7.93094	-	EH38E1387777	chr1	156213053	156213346	PLS,CTCF-bound	chr1	156213053	156213346
G01-GEA096HI	Male	chr8	23304112	C	T	E4 Multi-tissue	7.91701	-	EH38E2617130	chr8	23304025	23304375	dELS	chr8	23304025	23304375
3C565	Male	chr1	224183178	G	A	E5 B-cell-like	7.91298	-	EH38E1426316	chr1	224182969	224183317	PLS,CTCF-bound	chr1	224182969	224183317
3E467	Female	chr3	42654462	GCCCCGCGCCCCCCGCC	G	CTCF CTCF-Cohesin	7.88768	+	EH38E2195523	chr3	42654367	42654608	PLS,CTCF-bound	chr3	42654367	42654608
3C560	Male	chr20	34705533	T	C	CTCF CTCF-Cohesin	7.87308	+	EH38E2108618	chr20	34705314	34705659	pELS,CTCF-bound	chr20	34705314	34705659
G01-GEA154HI	Male	chr3	136819074	C	CGCAGGT	CTCF CTCF-Cohesin	7.83015	-	EH38E2241236	chr3	136818875	136819224	PLS,CTCF-bound	chr3	136818875	136819224
3E480	Male	chr8	8346293	T	C	E12 Erythroblast-like	7.83012	-	EH38E2608547	chr8	8346243	8346458	dELS	chr8	8346243	8346458
G01-GEA264HI	Male	chr9	113587901	C	T	CTCF CTCF-Cohesin	7.82821	+	EH38E2719575	chr9	113587780	113587971	dELS,CTCF-bound	chr9	113587780	113587971
G01-GEA195HI	Male	chr9	136944303	ATCCCCCGGCC	A	CTCF CTCF-Cohesin	7.82388	+	EH38E2737348	chr9	136944265	136944486	pELS,CTCF-bound	chr9	136944265	136944486
G01-GEA009HI	Male	chr21	41420445	GTAACAC	G	CTCF CTCF-Cohesin	7.82191	-	EH38E2143640	chr21	41420382	41420701	PLS,CTCF-bound	chr21	41420382	41420701
G01-GEA071HI	Female	chr1	228165749	A	G	CTCF CTCF-Cohesin	7.82156	-	EH38E1428902	chr1	228165475	228165822	PLS,CTCF-bound	chr1	228165475	228165822
G01-GEA310HI	Male	chr17	78314378	G	A	CTCF CTCF-Cohesin	7.8073	-	EH38E1888979	chr17	78314232	78314580	pELS,CTCF-bound	chr17	78314232	78314580
G01-GEA336HI	Male	chr1	6601191	G	A	E12 Erythroblast-like	7.79909	-	EH38E1314629	chr1	6601038	6601385	pELS,CTCF-bound	chr1	6601038	6601385
G01-GEA209HI	Male	chr14	54440934	G	C	CTCF CTCF-Cohesin	7.79707	+	EH38E1715322	chr14	54440928	54441190	pELS,CTCF-bound	chr14	54440928	54441190
G01-GEA309HI	Male	chr3	120094016	G	A	CTCF CTCF-Cohesin	7.79196	+	EH38E2231084	chr3	120093840	120094188	pELS,CTCF-bound	chr3	120093840	120094188
3C563	Male	chr2	202039113	C	T	E4 Multi-tissue	7.786	-	EH38E2066531	chr2	202038989	202039172	dELS,CTCF-bound	chr2	202038989	202039172
G01-GEA101HI	Male	chr1	202184866	G	A	CTCF CTCF-Cohesin	7.77652	-	EH38E1412468	chr1	202184716	202185062	DNase-H3K4me3,CTCF-bound	chr1	202184716	202185062
G01-GEA289HI	Female	chr15	74642542	G	A	TF3 FOXA1 / AR / ESR1	7.77336	-	EH38E1777868	chr15	74642449	74642772	dELS	chr15	74642449	74642772
3C565	Male	chr20	3807749	AATGCCCAGGCTTTGTGCCAGGTGCTG	A	E4 Multi-tissue	7.75335	-	EH38E2093761	chr20	3807415	3807764	pELS,CTCF-bound	chr20	3807415	3807764
G01-GEA180HI	Male	chr5	76715842	AGT	A	E4 Multi-tissue	7.75301	-	EH38E2383954	chr5	76715783	76716094	PLS,CTCF-bound	chr5	76715783	76716094
3G089	Male	chr5	42950829	ACT	A	E12 Erythroblast-like	7.74966	-	EH38E2369288	chr5	42950590	42950940	dELS,CTCF-bound	chr5	42950590	42950940
G01-GEA176HI	Male	chr11	12248657	ACT	A	TF3 FOXA1 / AR / ESR1	7.74527	-	EH38E1521502	chr11	12248448	12248797	dELS	chr11	12248448	12248797
G01-GEA176HI	Male	chr7	17706947	G	A	CTCF CTCF-Cohesin	7.72917	-	EH38E2537137	chr7	17706822	17707023	dELS,CTCF-bound	chr7	17706822	17707023
2F730	Male	chr9	72396729	A	G	E4 Multi-tissue	7.72325	-	EH38E2696767	chr9	72396649	72396988	dELS,CTCF-bound	chr9	72396649	72396988
3B336	Male	chr4	159229303	CAAG	C	E4 Multi-tissue	7.72049	-	EH38E2339997	chr4	159229216	159229562	dELS	chr4	159229216	159229562
G01-GEA160HI	Male	chr16	74623440	T	C	CTCF CTCF-Cohesin	7.70451	-	EH38E1827563	chr16	74623304	74623522	dELS,CTCF-bound	chr16	74623304	74623522
G01-GEA182HI	Male	chr14	39015568	C	T	CTCF CTCF-Cohesin	7.69502	+	EH38E1710104	chr14	39015442	39015676	dELS,CTCF-bound	chr14	39015442	39015676
3A551	Female	chr1	96721641	G	GCGGCGCCCACTCCCCCTAGTCC	CTCF CTCF-Cohesin	7.67866	-	EH38E1370199	chr1	96721542	96721891	PLS,CTCF-bound	chr1	96721542	96721891
G01-GEA288HI	Male	chr10	102399457	C	T	CTCF CTCF-Cohesin	7.67834	+	EH38E1494969	chr10	102399294	102399464	dELS,CTCF-bound	chr10	102399294	102399464
3E465	Male	chr6	6700069	T	G	CTCF CTCF-Cohesin	7.65591	+	EH38E2443034	chr6	6700026	6700375	dELS,CTCF-bound	chr6	6700026	6700375
G01-GEA105HI	Male	chr1	204493999	TTAAA	T	TF3 FOXA1 / AR / ESR1	7.65552	-	EH38E1414559	chr1	204493907	204494254	dELS,CTCF-bound	chr1	204493907	204494254
4B699	Male	chr5	148147640	A	T	TF3 FOXA1 / AR / ESR1	7.65214	-	EH38E2418968	chr5	148147456	148147800	dELS	chr5	148147456	148147800
G01-GEA120HI	Male	chr15	68560039	A	G	CTCF CTCF-Cohesin	7.65108	+	EH38E1773257	chr15	68559949	68560167	dELS,CTCF-bound	chr15	68559949	68560167
G01-GEA015HI	Male	chr17	82267645	G	A	E4 Multi-tissue	7.63227	-	EH38E1893224	chr17	82267567	82267914	dELS,CTCF-bound	chr17	82267567	82267914
3D612	Male	chr20	63521077	GGCCCCGCGCACAAAGCGCCTTTGTTCCACCCGCTCGGCCGGTTTGGGCTGGTTGGAGCCGCCCGC	G	CTCF CTCF-Cohesin	7.61606	-	EH38E2129350	chr20	63520983	63521309	pELS,CTCF-bound	chr20	63520983	63521309
G01-GEA313HI	Male	chr18	79379155	T	C	CTCF CTCF-Cohesin	7.61381	-	EH38E1929115	chr18	79379011	79379359	dELS,CTCF-bound	chr18	79379011	79379359
G01-GEA110HI	Female	chr19	58475950	A	ACG	CTCF CTCF-Cohesin	7.61315	+	EH38E1966374	chr19	58475949	58476299	PLS,CTCF-bound	chr19	58475949	58476299
3C567	Male	chr1	169109896	T	C	E4 Multi-tissue	7.61185	-	EH38E1395875	chr1	169109769	169110115	dELS,CTCF-bound	chr1	169109769	169110115
G01-GEA090HI	Male	chr16	67393471	C	G	CTCF CTCF-Cohesin	7.61163	-	EH38E1822874	chr16	67393391	67393741	PLS,CTCF-bound	chr16	67393391	67393741
G01-GEA158HI	Male	chr1	921208	C	T	CTCF CTCF-Cohesin	7.60294	-	EH38E1310236	chr1	921066	921390	pELS,CTCF-bound	chr1	921066	921390
G01-GEA158HI	Male	chr17	63425580	C	T	CTCF CTCF-Cohesin	7.59733	-	EH38E1877369	chr17	63425501	63425767	CTCF-only,CTCF-bound	chr17	63425501	63425767
G01-GEA071HI	Female	chr2	64645249	G	C	CTCF CTCF-Cohesin	7.59654	+	EH38E2003983	chr2	64645146	64645397	pELS,CTCF-bound	chr2	64645146	64645397
XH678	Male	chr12	132506935	C	T	E5 B-cell-like	7.58875	-	EH38E1657627	chr12	132506782	132507131	dELS,CTCF-bound	chr12	132506782	132507131
3E467	Female	chr14	64972468	C	G	CTCF CTCF-Cohesin	7.5854	+	EH38E1721575	chr14	64972165	64972471	PLS,CTCF-bound	chr14	64972165	64972471
G01-GEA143HI	Female	chr22	45263943	G	A	CTCF CTCF-Cohesin	7.5757	-	EH38E2169379	chr22	45263778	45264120	pELS,CTCF-bound	chr22	45263778	45264120
G01-GEA241HI	Male	chr5	168656720	G	T	TF3 FOXA1 / AR / ESR1	7.56559	+	EH38E2429436	chr5	168656691	168657040	dELS	chr5	168656691	168657040
2F957	Male	chr6	108589616	CA	C	E12 Erythroblast-like	7.56119	-	EH38E2492197	chr6	108589429	108589777	dELS,CTCF-bound	chr6	108589429	108589777
5B577	Male	chr12	50057269	A	G	CTCF CTCF-Cohesin	7.55278	+	EH38E1610668	chr12	50057191	50057439	pELS,CTCF-bound	chr12	50057191	50057439
3D630	Male	chr9	104928373	TGGGTG	T	CTCF CTCF-Cohesin	7.54738	+	EH38E2714049	chr9	104928031	104928380	PLS,CTCF-bound	chr9	104928031	104928380
3C544	Female	chr16	15551144	T	G	E4 Multi-tissue	7.53936	-	EH38E1804259	chr16	15550933	15551280	dELS,CTCF-bound	chr16	15550933	15551280
4B858	Male	chr1	23421988	G	A	TF3 FOXA1 / AR / ESR1	7.53795	+	EH38E1327776	chr1	23421769	23422113	dELS,CTCF-bound	chr1	23421769	23422113
G01-GEA003HI	Male	chr12	124914914	GT	G	CTCF CTCF-Cohesin	7.53465	-	EH38E1653874	chr12	124914803	124915047	pELS,CTCF-bound	chr12	124914803	124915047
G01-GEA104HI	Male	chr13	48233553	C	T	CTCF CTCF-Cohesin	7.53152	-	EH38E1674998	chr13	48233372	48233694	pELS,CTCF-bound	chr13	48233372	48233694
G01-GEA306HI	Male	chr14	76811160	G	A	CTCF CTCF-Cohesin	7.50977	+	EH38E1729580	chr14	76811054	76811382	pELS,CTCF-bound	chr14	76811054	76811382
G01-GEA307HI	Female	chr15	31264121	C	T	E4 Multi-tissue	7.50337	-	EH38E1750790	chr15	31263949	31264292	dELS,CTCF-bound	chr15	31263949	31264292
G01-GEA105HI	Male	chr22	38218776	C	G	E5 B-cell-like	7.48439	-	EH38E2163609	chr22	38218574	38218923	dELS,CTCF-bound	chr22	38218574	38218923
3C565	Male	chr11	48019472	C	G	E4 Multi-tissue	7.48204	+	EH38E1538692	chr11	48019243	48019593	dELS	chr11	48019243	48019593
G01-GEA305HI	Male	chr5	43020602	G	T	CTCF CTCF-Cohesin	7.47832	+	EH38E2369363	chr5	43020424	43020617	pELS,CTCF-bound	chr5	43020424	43020617
G01-GEA182HI	Male	chr4	663644	C	T	P Promoter	7.47726	-	EH38E2274047	chr4	663515	663865	pELS,CTCF-bound	chr4	663515	663865
G01-GEA241HI	Male	chr15	100849670	C	G	CTCF CTCF-Cohesin	7.46393	+	EH38E1793434	chr15	100849540	100849884	PLS,CTCF-bound	chr15	100849540	100849884
3D629	Male	chr4	25377246	C	CGGCGGGGCGG	CTCF CTCF-Cohesin	7.45656	-	EH38E2287160	chr4	25376988	25377337	PLS,CTCF-bound	chr4	25376988	25377337
G01-GEA152HI	Male	chr6	150395627	C	T	CTCF CTCF-Cohesin	7.45581	-	EH38E2514832	chr6	150395503	150395852	dELS,CTCF-bound	chr6	150395503	150395852
G01-GEA176HI	Male	chr4	52250255	GTAAAATTTGGCTCTCAAGCCAGAGATGAAGTCATGCTACTGGCTTTATAAGCTATTGCAGCTGCACAATGTCCCTAGAGACCCTCGTTCCCT	G	E4 Multi-tissue	7.45153	-	EH38E2296321	chr4	52250149	52250499	dELS	chr4	52250149	52250499
G01-GEA252HI	Male	chr2	70554293	G	T	CTCF CTCF-Cohesin	7.44832	-	EH38E2008111	chr2	70554030	70554351	PLS,CTCF-bound	chr2	70554030	70554351
G01-GEA302HI	Male	chr11	77141333	C	T	E4 Multi-tissue	7.42185	+	EH38E1554546	chr11	77141130	77141475	dELS,CTCF-bound	chr11	77141130	77141475
G01-GEA204HI	Male	chr11	796327	ACTTTCT	A	P Promoter	7.41019	-	EH38E1513960	chr11	796192	796541	PLS,CTCF-bound	chr11	796192	796541
G01-GEA224HI	Female	chr7	1466924	G	A	CTCF CTCF-Cohesin	7.38701	-	EH38E2528576	chr7	1466741	1467081	pELS,CTCF-bound	chr7	1466741	1467081
4B858	Male	chr9	113150867	G	C	CTCF CTCF-Cohesin	7.37694	+	EH38E2719176	chr9	113150771	113151121	PLS,CTCF-bound	chr9	113150771	113151121
G01-GEA041HI	Female	chr19	49339589	G	C	E4 Multi-tissue	7.36448	-	EH38E1960750	chr19	49339338	49339688	pELS,CTCF-bound	chr19	49339338	49339688
G01-GEA258HI	Female	chr3	183490884	C	T	E4 Multi-tissue	7.35271	-	EH38E2263743	chr3	183490794	183491139	dELS	chr3	183490794	183491139
3C554	Male	chr8	90646381	AGGCGCGCGCATGCCTGCGTGTCAG	A	CTCF CTCF-Cohesin	7.32612	-	EH38E2646552	chr8	90646295	90646614	PLS,CTCF-bound	chr8	90646295	90646614
5G257	Male	chr14	21511379	G	A	E5 B-cell-like	7.31411	-	EH38E1701695	chr14	21511289	21511639	PLS,CTCF-bound	chr14	21511289	21511639
G01-GEA120HI	Male	chr1	226738672	G	A	CTCF CTCF-Cohesin	7.31247	-	EH38E1428043	chr1	226738496	226738836	pELS,CTCF-bound	chr1	226738496	226738836
3C545	Male	chr18	8480682	C	T	CTCF CTCF-Cohesin	7.30819	+	EH38E1898420	chr18	8480504	8480801	dELS,CTCF-bound	chr18	8480504	8480801
3E480	Male	chr11	59198255	C	T	E4 Multi-tissue	7.30601	-	EH38E1540326	chr11	59198035	59198385	dELS	chr11	59198035	59198385
G01-GEA159HI	Female	chr1	150272696	GGGA	G	CTCF CTCF-Cohesin	7.30284	-	EH38E1383481	chr1	150272587	150272763	PLS,CTCF-bound	chr1	150272587	150272763
G01-GEA032HI	Female	chr10	19638799	T	C	TF3 FOXA1 / AR / ESR1	7.2915	-	EH38E1452878	chr10	19638553	19638902	dELS,CTCF-bound	chr10	19638553	19638902
G01-GEA028HI	Male	chr6	2988496	G	A	E4 Multi-tissue	7.28442	-	EH38E2440284	chr6	2988462	2988811	PLS,CTCF-bound	chr6	2988462	2988811
G01-GEA124HI	Male	chr19	1101967	G	A	CTCF CTCF-Cohesin	7.2723	-	EH38E1930835	chr19	1101747	1102092	dELS,CTCF-bound	chr19	1101747	1102092
3C565	Male	chr1	204349012	C	G	E4 Multi-tissue	7.2596	-	EH38E1414381	chr1	204348827	204349167	pELS,CTCF-bound	chr1	204348827	204349167
3A550	Male	chr21	41958268	C	A	CTCF CTCF-Cohesin	7.21724	-	EH38E2144178	chr21	41958084	41958433	dELS,CTCF-bound	chr21	41958084	41958433
G01-GEA193HI	Male	chr4	54091912	C	A	P Promoter	7.19981	-	EH38E2297429	chr4	54091778	54092117	dELS,CTCF-bound	chr4	54091778	54092117
3C563	Male	chr10	102399458	C	T	CTCF CTCF-Cohesin	7.19168	+	EH38E1494969	chr10	102399294	102399464	dELS,CTCF-bound	chr10	102399294	102399464
3E480	Male	chr5	168295674	T	G	CTCF CTCF-Cohesin	7.18021	-	EH38E2429172	chr5	168295615	168295965	dELS,CTCF-bound	chr5	168295615	168295965
G01-GEA136HI	Male	chr12	120226063	C	CG	E5 B-cell-like	7.16669	-	EH38E1649731	chr12	120225979	120226318	pELS,CTCF-bound	chr12	120225979	120226318
G01-GEA283HI	Male	chr6	142845958	G	A	CTCF CTCF-Cohesin	7.15536	-	EH38E2510445	chr6	142845957	142846307	dELS,CTCF-bound	chr6	142845957	142846307
G01-GEA173HI	Male	chr22	40683167	G	A	CTCF CTCF-Cohesin	7.15028	-	EH38E2165778	chr22	40683065	40683415	dELS,CTCF-bound	chr22	40683065	40683415
3A550	Male	chr11	129854022	C	T	E4 Multi-tissue	7.14996	-	EH38E1582038	chr11	129853862	129854211	dELS	chr11	129853862	129854211
G01-GEA337HI	Male	chr12	132904903	G	C	CTCF CTCF-Cohesin	7.13982	-	EH38E1657935	chr12	132904755	132905103	dELS,CTCF-bound	chr12	132904755	132905103
G01-GEA269HI	Male	chr20	310081	G	T	CTCF CTCF-Cohesin	7.13898	-	EH38E2091293	chr20	309931	310273	dELS,CTCF-bound	chr20	309931	310273
3A671	Female	chr9	37995108	C	T	E12 Erythroblast-like	7.11845	+	EH38E2693598	chr9	37994902	37995234	dELS,CTCF-bound	chr9	37994902	37995234
G01-GEA309HI	Male	chr16	31458073	G	A	CTCF CTCF-Cohesin	7.11834	+	EH38E1812265	chr16	31458073	31458420	PLS,CTCF-bound	chr16	31458073	31458420
G01-GEA059HI	Female	chr17	10128106	C	T	E4 Multi-tissue	7.11354	+	EH38E1846509	chr17	10127853	10128190	dELS,CTCF-bound	chr17	10127853	10128190
5L790	Male	chr17	81821912	A	G	CTCF CTCF-Cohesin	7.11067	+	EH38E1892619	chr17	81821771	81822120	dELS,CTCF-bound	chr17	81821771	81822120
G01-GEA129HI	Male	chr2	74422312	CT	C	CTCF CTCF-Cohesin	7.10799	-	EH38E2010383	chr2	74422162	74422512	pELS,CTCF-bound	chr2	74422162	74422512
3B334	Female	chr9	122123147	C	CCCTG	CTCF CTCF-Cohesin	7.09626	-	EH38E2724497	chr9	122123018	122123298	DNase-H3K4me3,CTCF-bound	chr9	122123018	122123298
4B693	Male	chr6	6915891	G	A	TF5 AR	7.08406	-	EH38E2443279	chr6	6915801	6916075	dELS,CTCF-bound	chr6	6915801	6916075
3B479	Male	chr5	147822910	A	G	CTCF CTCF-Cohesin	7.08053	-	EH38E2418789	chr5	147822722	147823047	dELS,CTCF-bound	chr5	147822722	147823047
G01-GEA149HI	Male	chr6	136289518	C	A	CTCF CTCF-Cohesin	7.06836	-	EH38E2506355	chr6	136289190	136289539	pELS,CTCF-bound	chr6	136289190	136289539
G01-GEA143HI	Female	chr3	10192241	G	A	CTCF CTCF-Cohesin	7.06668	-	EH38E2177628	chr3	10192126	10192474	dELS,CTCF-bound	chr3	10192126	10192474
G01-GEA045HI	Male	chr7	33905589	C	A	CTCF CTCF-Cohesin	7.05272	+	EH38E2547104	chr7	33905393	33905650	pELS,CTCF-bound	chr7	33905393	33905650
G01-GEA040HI	Male	chr6	30884898	CG	C	CTCF CTCF-Cohesin	7.05088	-	EH38E2458724	chr6	30884845	30885187	PLS,CTCF-bound	chr6	30884845	30885187
3C575	Male	chr6	169722678	G	C	E4 Multi-tissue	7.04285	+	EH38E2526500	chr6	169722678	169723017	pELS	chr6	169722678	169723017
3A550	Male	chr8	688179	G	C	CTCF CTCF-Cohesin	7.04045	+	EH38E2606034	chr8	688015	688198	dELS,CTCF-bound	chr8	688015	688198
G01-GEA154HI	Male	chr1	234964043	A	G	CTCF CTCF-Cohesin	7.03367	-	EH38E1433916	chr1	234963890	234964093	PLS,CTCF-bound	chr1	234963890	234964093
G01-GEA335HI	Male	chr2	160208246	A	G	E12 Erythroblast-like	7.03075	+	EH38E2045361	chr2	160208048	160208397	dELS	chr2	160208048	160208397
3D616	Female	chr2	27096408	TGG	T	CTCF CTCF-Cohesin	7.02415	-	EH38E1982529	chr2	27096358	27096695	dELS,CTCF-bound	chr2	27096358	27096695
5G257	Male	chr11	57781647	G	A	E12 Erythroblast-like	7.02063	+	EH38E1539792	chr11	57781545	57781893	dELS,CTCF-bound	chr11	57781545	57781893
G01-GEA336HI	Male	chr10	132458694	C	T	CTCF CTCF-Cohesin	7.01992	+	EH38E1512344	chr10	132458526	132458869	dELS,CTCF-bound	chr10	132458526	132458869
4B713	Male	chr3	133664060	G	C	CTCF CTCF-Cohesin	7.01723	+	EH38E2239584	chr3	133663765	133664100	pELS,CTCF-bound	chr3	133663765	133664100
G01-GEA045HI	Male	chrX	74292675	A	AGC	CTCF CTCF-Cohesin	7.01684	-	EH38E2758834	chrX	74292470	74292820	PLS,CTCF-bound	chrX	74292470	74292820
3C567	Male	chr2	101253272	G	A	CTCF CTCF-Cohesin	7.01052	-	EH38E2019661	chr2	101253113	101253460	pELS,CTCF-bound	chr2	101253113	101253460
3C145	Female	chr10	12068760	CGCGGAACACTTACTTGCCCCGCCCT	C	CTCF CTCF-Cohesin	7.00806	+	EH38E1448551	chr10	12068670	12069020	PLS,CTCF-bound	chr10	12068670	12069020
3D629	Male	chr22	41367481	G	A	CTCF CTCF-Cohesin	6.95183	-	EH38E2166253	chr22	41367193	41367524	PLS,CTCF-bound	chr22	41367193	41367524
G01-GEA278HI	Male	chr19	47239780	GA	G	CTCF CTCF-Cohesin	6.93904	+	EH38E1959065	chr19	47239585	47239934	dELS,CTCF-bound	chr19	47239585	47239934
G01-GEA163HI	Male	chr3	128011386	A	G	CTCF CTCF-Cohesin	6.93268	-	EH38E2236088	chr3	128011209	128011532	dELS,CTCF-bound	chr3	128011209	128011532
2F957	Male	chr15	79311205	G	A	CTCF CTCF-Cohesin	6.92989	-	EH38E1781110	chr15	79310983	79311333	PLS,CTCF-bound	chr15	79310983	79311333
3C147	Male	chr17	42311718	G	C	E4 Multi-tissue	6.92967	-	EH38E1863407	chr17	42311543	42311890	dELS,CTCF-bound	chr17	42311543	42311890
3B374	Male	chr14	39170408	C	T	P Promoter	6.92839	-	EH38E1710169	chr14	39170301	39170637	PLS,CTCF-bound	chr14	39170301	39170637
G01-GEA195HI	Male	chr20	44960336	C	A	CTCF CTCF-Cohesin	6.91726	+	EH38E2115210	chr20	44960274	44960623	PLS,CTCF-bound	chr20	44960274	44960623
G01-GEA148HI	Female	chr19	54464798	G	C	CTCF CTCF-Cohesin	6.91706	-	EH38E1964223	chr19	54464641	54464970	pELS,CTCF-bound	chr19	54464641	54464970
4B693	Male	chr12	32399733	GGGCCGCTC	G	CTCF CTCF-Cohesin	6.91673	-	EH38E1603792	chr12	32399506	32399818	PLS,CTCF-bound	chr12	32399506	32399818
G01-GEA101HI	Male	chr3	177615233	A	G	E4 Multi-tissue	6.91381	-	EH38E2260753	chr3	177615009	177615357	dELS,CTCF-bound	chr3	177615009	177615357
G01-GEA232HI	Male	chr1	76154908	C	T	CTCF CTCF-Cohesin	6.902	-	EH38E1359923	chr1	76154687	76154997	dELS,CTCF-bound	chr1	76154687	76154997
3E475	Male	chr6	13303902	C	A	E4 Multi-tissue	6.90185	-	EH38E2447290	chr6	13303753	13304029	dELS,CTCF-bound	chr6	13303753	13304029
G01-GEA070HI	Male	chr8	141727082	C	T	CTCF CTCF-Cohesin	6.8995	-	EH38E2674021	chr8	141726909	141727242	dELS,CTCF-bound	chr8	141726909	141727242
2F957	Male	chr6	46491481	A	T	E4 Multi-tissue	6.89496	-	EH38E2470776	chr6	46491289	46491623	PLS,CTCF-bound	chr6	46491289	46491623
G01-GEA173HI	Male	chr1	119712453	CGGATGCCAGCGCG	C	E4 Multi-tissue	6.88653	+	EH38E1381575	chr1	119712279	119712621	pELS,CTCF-bound	chr1	119712279	119712621
3C567	Male	chr2	237291626	C	T	E12 Erythroblast-like	6.88523	-	EH38E2087181	chr2	237291413	237291748	dELS	chr2	237291413	237291748
G01-GEA302HI	Male	chr14	81221820	C	T	CTCF CTCF-Cohesin	6.88521	-	EH38E1731687	chr14	81221721	81221970	pELS,CTCF-bound	chr14	81221721	81221970
3C567	Male	chr1	211135536	G	A	CTCF CTCF-Cohesin	6.8775	+	EH38E1419374	chr1	211135383	211135668	DNase-H3K4me3,CTCF-bound	chr1	211135383	211135668
3B374	Male	chr1	16144047	C	T	E12 Erythroblast-like	6.87252	-	EH38E1322197	chr1	16143791	16144122	dELS,CTCF-bound	chr1	16143791	16144122
G01-GEA262HI	Female	chr15	74173093	G	C	E4 Multi-tissue	6.85407	-	EH38E1777348	chr15	74173030	74173231	pELS,CTCF-bound	chr15	74173030	74173231
3B331	Male	chr2	54560497	G	C	E4 Multi-tissue	6.83399	-	EH38E1998712	chr2	54560409	54560625	dELS,CTCF-bound	chr2	54560409	54560625
3B331	Male	chr11	120710611	T	C	E4 Multi-tissue	6.83084	-	EH38E1576069	chr11	120710397	120710743	dELS,CTCF-bound	chr11	120710397	120710743
G01-GEA241HI	Male	chr14	73490975	C	CG	CTCF CTCF-Cohesin	6.81527	-	EH38E1727179	chr14	73490753	73491103	PLS,CTCF-bound	chr14	73490753	73491103
G01-GEA285HI	Male	chr17	47279270	C	T	CTCF CTCF-Cohesin	6.77989	-	EH38E1867093	chr17	47279221	47279570	pELS,CTCF-bound	chr17	47279221	47279570
3C562	Male	chr1	28552598	C	G	CTCF CTCF-Cohesin	6.76013	-	EH38E1332384	chr1	28552486	28552732	pELS,CTCF-bound	chr1	28552486	28552732
G01-GEA296HI	Male	chr1	6236102	GCCCGCCCGCCCCTC	G	CTCF CTCF-Cohesin	6.74283	+	EH38E1314225	chr1	6235829	6236178	PLS,CTCF-bound	chr1	6235829	6236178
G01-GEA050HI	Male	chr1	58885464	T	A	TF3 FOXA1 / AR / ESR1	6.73744	-	EH38E1351719	chr1	58885368	58885697	dELS,CTCF-bound	chr1	58885368	58885697
G01-GEA292HI	Male	chr6	157382091	C	G	CTCF CTCF-Cohesin	6.73318	-	EH38E2518845	chr6	157381950	157382165	pELS,CTCF-bound	chr6	157381950	157382165
G01-GEA180HI	Male	chr11	122749121	A	G	E12 Erythroblast-like	6.70841	-	EH38E1577546	chr11	122748936	122749286	dELS	chr11	122748936	122749286
G01-GEA149HI	Male	chr6	143940273	G	C	CTCF CTCF-Cohesin	6.6979	-	EH38E2511159	chr6	143940046	143940379	CTCF-only,CTCF-bound	chr6	143940046	143940379
3D630	Male	chr5	131165285	G	T	CTCF CTCF-Cohesin	6.69629	-	EH38E2407636	chr5	131165155	131165505	PLS,CTCF-bound	chr5	131165155	131165505
3C567	Male	chr3	193743837	GTT	G	CTCF CTCF-Cohesin	6.69132	+	EH38E2270308	chr3	193743809	193743973	dELS	chr3	193743809	193743973
G01-GEA154HI	Male	chr1	44819599	G	A	CTCF CTCF-Cohesin	6.6755	-	EH38E1343706	chr1	44819572	44819907	pELS,CTCF-bound	chr1	44819572	44819907
G01-GEA226HI	Female	chr2	15730606	C	T	E12 Erythroblast-like	6.6431	+	EH38E1975700	chr2	15730505	15730771	dELS,CTCF-bound	chr2	15730505	15730771
3E473	Male	chr8	38787410	G	A	CTCF CTCF-Cohesin	6.62375	-	EH38E2625815	chr8	38787305	38787566	PLS,CTCF-bound	chr8	38787305	38787566
G01-GEA124HI	Male	chr19	16324988	G	C	CTCF CTCF-Cohesin	6.62082	+	EH38E1942476	chr19	16324949	16325100	PLS,CTCF-bound	chr19	16324949	16325100
G01-GEA041HI	Female	chr1	168439950	G	A	CTCF CTCF-Cohesin	6.61699	-	EH38E1395437	chr1	168439772	168440122	dELS,CTCF-bound	chr1	168439772	168440122
G01-GEA071HI	Female	chr7	42857065	C	G	CTCF CTCF-Cohesin	6.6111	-	EH38E2552142	chr7	42856916	42857211	dELS,CTCF-bound	chr7	42856916	42857211
3D612	Male	chr1	54547832	A	G	CTCF CTCF-Cohesin	6.61035	-	EH38E1349098	chr1	54547662	54547866	pELS,CTCF-bound	chr1	54547662	54547866
G01-GEA279HI	Female	chr5	112420556	GA	G	CTCF CTCF-Cohesin	6.60536	+	EH38E2399121	chr5	112420251	112420592	pELS,CTCF-bound	chr5	112420251	112420592
G01-GEA182HI	Male	chr1	159854907	G	C	CTCF CTCF-Cohesin	6.59548	-	EH38E1389920	chr1	159854734	159855084	pELS,CTCF-bound	chr1	159854734	159855084
G01-GEA217HI	Male	chr15	63970181	C	T	E4 Multi-tissue	6.59432	+	EH38E1769565	chr15	63970040	63970388	dELS,CTCF-bound	chr15	63970040	63970388
G01-GEA249HI	Male	chr16	2015492	ATTGT	A	TF3 FOXA1 / AR / ESR1	6.58581	-	EH38E1796255	chr16	2015437	2015784	dELS,CTCF-bound	chr16	2015437	2015784
G01-GEA278HI	Male	chr7	43954704	C	T	CTCF CTCF-Cohesin	6.58365	-	EH38E2552830	chr7	43954552	43954901	dELS,CTCF-bound	chr7	43954552	43954901
3B334	Female	chr6	170049794	C	T	E4 Multi-tissue	6.58309	-	EH38E2526737	chr6	170049723	170050051	dELS	chr6	170049723	170050051

## Sheet: Supplementary Table 3
Supplementary Table 3. Enrichment of Sequence Classes for Ultra-Rare Inherited Variants Across ENCODE cCRE Categories. Significant one-sided proportion tests are highlighted in bold.
cCRE classification Sei regulatory class	CTCF-only,CTCF-bound	dELS	dELS,CTCF-bound	DNase-H3K4me3,CTCF-bound	pELS	pELS,CTCF-bound	PLS	PLS,CTCF-bound
CTCF CTCF-Cohesin	1.79e-06	1	1	0.04	1	8.293e-10	0.99	< 2.2E-16
E1 Stem cell	-	0.00201	2.447e-05	0.5	0.53	1	0.000161	0.10
E10 Brain	-	0.01	0.06	-	0.41	0.9	-	-
E11 T-cell	-	0.29	0.000795	0.5	0.67	1	-	0.84
E12 Erythroblast-like	0.97	6.309e-11	1.295e-06	0.64	0.02	1	0.49	1
E2 Multi-tissue	-	0.5	0.00109	0.44	0.35	0.79	-	0.99
E3 Brain / Melanocyte	-	0.01	0.27	-	-	0.67	-	-
E4 Multi-tissue	0.91	< 2.2E-16	0.06	0.4	2.263e-05	0.58	0.00629	1
E5 B-cell-like	1	0.97	0.99	0.98	0.81	1	0.89	< 2.2E-16
E6 Weak epithelial	0.2	9.275e-08	0.15	0.62	1.377e-13	0.89	0.39	1
E7 Monocyte / Macrophage	-	0.000383	0.00477	0.5	0.26	0.73	0.43	1
E8 Weak multi-tissue	-	0.00285	0.04	-	-	-	-	-
E9 Liver / Intestine	0.5	1.314e-14	0.06	-	0.21	1	-	1
HET1 Heterochromatin	-	-	0.36	-	-	-	-	-
HET4 Heterochromatin	-	0.45	0.57	-	-	0.5	-	0.41
HET5 Centromere	-	-	-	-	-	-	-	0.29
L5 Low signal	0.72	0.67	0.00982	0.02	6.924e-10	0.68	-	1
P Promoter	1	1	1	-	0.99	0.14	0.2	< 2.2E-16
PC1 Polycomb / Heterochromatin	-	-	0.67	-	-	0.5	0.04	0.52
PC2 Weak Polycomb	-	-	0.01	-	-	-	-	-
PC3 Polycomb	-	-	0.5	-	-	0.5	-	-
PC4 Polycomb / Bivalent stem cell Enh	-	0.91	0.81	-	0.5	9.397e-07	0.15	1
TF2 CEBPB	0.25	0.2	0.49	-	0.5	0.96	0.48	0.29
TF3 FOXA1 / AR / ESR1	0.56	< 2.2E-16	3.225e-14	0.78	0.1	1	0.44	1
TF4 OTX2	0.5	1.631e-05	0.1	0.37	0.24	0.98	-	1
TF5 AR	0.8	6.68e-05	0.00963	-	0.23	0.86	0.23	1
TN1 Transcription	-	0.02	0.15	-	-	0.73	-	-
TN2 Transcription	-	-	0.36	-	-	-	-	-
TN3 Transcription	-	0.5	0.02	-	-	0.67	-	-
TN4 Transcription	0.09	-	0.04	-	-	-	-	-

## Sheet:  Suppl Table 4 T Gene de novo
Supplementary Table 4. Predicted Target Genes and Correlation Metrics for De Novo cCREs from T-Gene Analysis. Only the most linked gene (lowest CnD p-value ) and (CnD p-value) < 0.05 were used as input for subsequent analyses
Gene_ID	Gene_Name	TSS_ID	RE_Locus	Distance	Closest_TSS	Correlation	CnD_P_Value	Q_Value
ENSG00000107242.11	PIP5K1B	ENST00000541509.1	chr9:71319953-71320301	-274	T	0.9859	1.13e-06	0.00191
ENSG00000107242.11	PIP5K1B	ENST00000377290.1	chr9:71319953-71320301	-315	F	0.98488	1.23e-06	0.00191
ENSG00000214530.2	STARD10	ENST00000535054.1	chr11:72492709-72493056	0	T	0.93971	5.73e-06	0.0045
ENSG00000214530.2	STARD10	ENST00000545082.1	chr11:72492709-72493056	0	T	0.93839	5.81e-06	0.0045
ENSG00000214530.2	STARD10	ENST00000537947.1	chr11:72492709-72493056	0	T	0.88286	1.6e-05	0.00993
ENSG00000113558.12	SKP1	ENST00000353411.5	chr5:133512267-133512448	281	F	-0.88623	3.02e-05	0.0156
ENSG00000184500.10	PROS1	ENST00000348974.4	chr3:93692654-93693003	0	T	0.79084	4.78e-05	0.0212
ENSG00000184500.10	PROS1	ENST00000394236.3	chr3:93692654-93693003	0	T	0.65985	0.000128	0.0495
ENSG00000183665.4	TRMT12	ENST00000328599.3	chr8:125462455-125462787	-261	T	0.75671	0.000145	0.05
ENSG00000183665.4	TRMT12	ENST00000521443.1	chr8:125462455-125462787	-274	F	0.74683	0.000164	0.051
ENSG00000214530.2	STARD10	ENST00000546314.1	chr11:72492709-72493056	348	F	0.66926	0.000325	0.0918
ENSG00000226237.1	RP11-276H19.1	ENST00000415801.1	chr9:89562560-89562906	-708	F	0.72284	0.000371	0.0959
ENSG00000151612.10	ZNF827	ENST00000379448.4	chr4:146857833-146858177	1446	T	0.73786	0.000577	0.103
ENSG00000151612.10	ZNF827	ENST00000513320.1	chr4:146857833-146858177	1464	F	0.72347	0.000648	0.103
ENSG00000237886.1	RP11-611D20.2	ENST00000429224.1	chr9:139440564-139440913	0	T	0.25659	0.000651	0.103
ENSG00000176749.3	CDK5R1	ENST00000313401.3	chr17:30813796-30814109	159	T	0.41196	0.000672	0.103
ENSG00000118508.4	RAB32	ENST00000367495.3	chr6:146864300-146864545	-284	T	0.44771	0.000743	0.103
ENSG00000254667.1	AP000783.1	ENST00000533341.1	chr11:123300648-123300995	-63	T	0.28234	0.000793	0.103
ENSG00000165792.10	METT11D1	ENST00000536700.1	chr14:21457862-21458211	0	T	0.17268	0.000826	0.103
ENSG00000197620.6	CXorf40A	ENST00000450602.2	chrX:148621902-148622125	-50	F	-0.13465	0.000857	0.103
ENSG00000188859.5	FAM78B	ENST00000354422.3	chr1:166135873-166136085	0	T	0.02916	0.000871	0.103
ENSG00000197620.6	CXorf40A	ENST00000441248.1	chrX:148621902-148622125	-62	F	-0.14733	0.000882	0.103
ENSG00000177613.7	CSTF2T	ENST00000331173.4	chr10:53459300-53459501	0	T	-0.02066	0.000887	0.103
ENSG00000143442.15	POGZ	ENST00000531094.1	chr1:151431430-151431727	0	T	-0.07366	0.000964	0.103
ENSG00000188859.5	FAM78B	ENST00000338353.3	chr1:166135873-166136085	121	F	0.19777	0.00098	0.103
ENSG00000143442.15	POGZ	ENST00000540984.1	chr1:151431430-151431727	0	T	-0.05694	0.00103	0.103
ENSG00000143442.15	POGZ	ENST00000491586.1	chr1:151431430-151431727	0	T	-0.05572	0.00104	0.103
ENSG00000113558.12	SKP1	ENST00000517625.1	chr5:133512267-133512448	0	T	0.00319	0.00107	0.103
ENSG00000107611.9	CUBN	ENST00000545090.1	chr10:17065418-17065758	0	T	0.06021	0.00115	0.103
ENSG00000174718.7	C12orf35	ENST00000535606.1	chr12:32112646-32112812	49	T	0.01731	0.00117	0.103
ENSG00000119787.9	ATL2	ENST00000406122.1	chr2:38604692-38604864	-265	T	0.26238	0.0012	0.103
ENSG00000197620.6	CXorf40A	ENST00000431132.2	chrX:148621902-148622125	2	T	0.00602	0.00121	0.103
ENSG00000119787.9	ATL2	ENST00000451483.1	chr2:38604692-38604864	-271	F	0.26264	0.00122	0.103
ENSG00000119787.9	ATL2	ENST00000419554.2	chr2:38604692-38604864	-277	F	0.26223	0.00124	0.103
ENSG00000119787.9	ATL2	ENST00000449130.1	chr2:38604692-38604864	-289	F	0.26307	0.00127	0.103
ENSG00000119787.9	ATL2	ENST00000443098.1	chr2:38604692-38604864	-294	F	0.26266	0.00129	0.103
ENSG00000113558.12	SKP1	ENST00000522552.1	chr5:133512267-133512448	207	F	-0.18328	0.0013	0.103
ENSG00000165792.10	METT11D1	ENST00000339374.5	chr14:21457862-21458211	0	T	-0.03508	0.00132	0.103
ENSG00000113558.12	SKP1	ENST00000521216.1	chr5:133512267-133512448	163	F	-0.11325	0.00137	0.103
ENSG00000249738.2	AC008697.1	ENST00000515337.1	chr5:158758497-158758845	0	T	0.02678	0.00138	0.103
ENSG00000170837.2	GPR27	ENST00000304411.2	chr3:71803327-71803485	126	F	0.05387	0.00139	0.103
ENSG00000197620.6	CXorf40A	ENST00000393985.3	chrX:148621902-148622125	-394	F	0.30205	0.00148	0.103
ENSG00000197620.6	CXorf40A	ENST00000423421.1	chrX:148621902-148622125	-395	F	0.30205	0.00148	0.103
ENSG00000197620.6	CXorf40A	ENST00000423540.2	chrX:148621902-148622125	-403	F	0.30449	0.00149	0.103
ENSG00000197256.5	KANK2	ENST00000432929.2	chr19:11308437-11308721	-194	T	-0.1691	0.00151	0.103
ENSG00000197620.6	CXorf40A	ENST00000434353.2	chrX:148621902-148622125	-407	F	0.29949	0.00153	0.103
ENSG00000174718.7	C12orf35	ENST00000541981.1	chr12:32112646-32112812	342	F	0.19988	0.00171	0.109
ENSG00000197620.6	CXorf40A	ENST00000514208.1	chrX:148621902-148622125	-444	F	0.277	0.00174	0.109
ENSG00000196189.6	SEMA4A	ENST00000485575.1	chr1:156046569-156046902	-73092	F	0.93055	0.00179	0.109
ENSG00000112242.9	E2F3	ENST00000535432.1	chr6:20403541-20403890	-144	T	0.09143	0.0018	0.109
ENSG00000140396.7	NCOA2	ENST00000452400.2	chr8:71315521-71315825	215	T	0.13093	0.00181	0.109
ENSG00000241769.2	AF011889.4	ENST00000447209.1	chrX:148621902-148622125	213	F	0.09058	0.00184	0.109
ENSG00000214530.2	STARD10	ENST00000538437.1	chr11:72492709-72493056	-548	F	0.32597	0.00188	0.109
ENSG00000241769.2	AF011889.4	ENST00000541582.1	chrX:148621902-148622125	233	F	0.09754	0.00189	0.109
ENSG00000150630.2	VEGFC	ENST00000280193.2	chr4:177713955-177714296	-74	T	0.0213	0.00196	0.111
ENSG00000143442.15	POGZ	ENST00000437847.3	chr1:151431430-151431727	205	F	0.07395	0.0021	0.114
ENSG00000143442.15	POGZ	ENST00000271715.2	chr1:151431430-151431727	214	F	0.07674	0.00213	0.114
ENSG00000125772.7	GPCPD1	ENST00000481690.1	chr20:5590956-5591294	276	T	0.13329	0.00214	0.114
ENSG00000148400.9	NOTCH1	ENST00000277541.6	chr9:139440564-139440913	-250	F	0.1075	0.00221	0.115
ENSG00000174718.7	C12orf35	ENST00000535596.1	chr12:32112646-32112812	274	F	0.05016	0.00233	0.115
ENSG00000163412.7	EIF4E3	ENST00000448225.1	chr3:71803327-71803485	47	T	0	0.00234	0.115
ENSG00000128050.4	PAICS	ENST00000512576.1	chr4:57302653-57302911	335	T	-0.11447	0.00235	0.115
ENSG00000163412.7	EIF4E3	ENST00000496214.2	chr3:71803327-71803485	49	F	0	0.00237	0.115
ENSG00000174718.7	C12orf35	ENST00000312561.4	chr12:32112646-32112812	293	F	0.0564	0.00238	0.115
ENSG00000184500.10	PROS1	ENST00000472684.1	chr3:93692654-93693003	-171	F	0.03514	0.00243	0.116
ENSG00000174718.7	C12orf35	ENST00000397578.3	chr12:32112646-32112812	263	F	0.03094	0.00249	0.116
ENSG00000118263.10	KLF7	ENST00000458272.1	chr2:208028810-208029086	1209	T	0.4043	0.00254	0.116
ENSG00000174718.7	C12orf35	ENST00000540924.1	chr12:32112646-32112812	304	F	0.04426	0.00257	0.116
ENSG00000184500.10	PROS1	ENST00000394236.3	chr3:93692654-93693003	0	T	0.90017	0.00259	0.116
ENSG00000143442.15	POGZ	ENST00000368863.2	chr1:151431430-151431727	0	T	0	0.00271	0.117
ENSG00000143442.15	POGZ	ENST00000409503.1	chr1:151431430-151431727	0	T	0	0.00271	0.117
ENSG00000143442.15	POGZ	ENST00000533351.1	chr1:151431430-151431727	0	T	0	0.00271	0.117
ENSG00000197702.6	PARVA	ENST00000334956.7	chr11:12399352-12399682	326	F	0.07203	0.00283	0.12
ENSG00000181284.2	TMEM102	ENST00000323206.1	chr17:7339746-7340086	984	F	-0.31011	0.00301	0.126
ENSG00000118263.10	KLF7	ENST00000309446.6	chr2:208028810-208029086	1583	F	0.41037	0.0031	0.127
ENSG00000165792.10	METT11D1	ENST00000382985.3	chr14:21457862-21458211	0	T	0	0.00313	0.127
ENSG00000125772.7	GPCPD1	ENST00000379019.4	chr20:5590956-5591294	378	F	0.06991	0.00314	0.127
ENSG00000181284.2	TMEM102	ENST00000396568.1	chr17:7339746-7340086	973	T	-0.28708	0.00321	0.128
ENSG00000163412.7	EIF4E3	ENST00000421769.2	chr3:71803327-71803485	439	F	0.04047	0.00339	0.133
ENSG00000180447.5	GAS1	ENST00000298743.7	chr9:89562560-89562906	-456	T	0.04209	0.00399	0.152
ENSG00000163412.7	EIF4E3	ENST00000295612.3	chr3:71803327-71803485	-552	F	0.04218	0.004	0.152
ENSG00000128059.4	PPAT	ENST00000264220.2	chr4:57302653-57302911	-872	F	0.16577	0.00402	0.152
ENSG00000113558.12	SKP1	ENST00000328392.6	chr5:133512267-133512448	193	F	0	0.0048	0.173
ENSG00000113558.12	SKP1	ENST00000519321.1	chr5:133512267-133512448	193	F	0	0.0048	0.173
ENSG00000113558.12	SKP1	ENST00000522855.1	chr5:133512267-133512448	193	F	0	0.0048	0.173
ENSG00000107242.11	PIP5K1B	ENST00000472907.1	chr9:71319953-71320301	-600	F	0.04025	0.00484	0.173
ENSG00000107242.11	PIP5K1B	ENST00000474356.1	chr9:71319953-71320301	-601	F	0.04031	0.00485	0.173
ENSG00000214530.2	STARD10	ENST00000536290.1	chr11:72492709-72493056	518	F	0.02115	0.00494	0.174
ENSG00000168556.5	ING2	ENST00000412117.1	chr4:184429159-184429357	1924	F	-0.30127	0.00509	0.177
ENSG00000254726.1	MEX3A	ENST00000532414.1	chr1:156046569-156046902	4887	F	0.51671	0.00541	0.187
ENSG00000241769.2	AF011889.4	ENST00000436708.1	chrX:148621902-148622125	233	F	0	0.0057	0.194
ENSG00000143442.15	POGZ	ENST00000361398.3	chr1:151431430-151431727	205	F	0	0.00583	0.196
ENSG00000112242.9	E2F3	ENST00000378646.3	chr6:20403541-20403890	1404	F	-0.17444	0.00587	0.196
ENSG00000119787.9	ATL2	ENST00000539122.1	chr2:38604692-38604864	-277	F	0	0.00597	0.197
ENSG00000119787.9	ATL2	ENST00000378954.4	chr2:38604692-38604864	-288	F	0	0.00613	0.2
ENSG00000091583.5	APOH	ENST00000205948.5	chr17:64536565-64536874	-311009	F	0.92983	0.00648	0.21
ENSG00000197702.6	PARVA	ENST00000539723.1	chr11:12399352-12399682	242	T	0	0.0066	0.211
ENSG00000151612.10	ZNF827	ENST00000440280.2	chr4:146857833-146858177	1610	F	0.16211	0.00675	0.214
ENSG00000168556.5	ING2	ENST00000302327.3	chr4:184429159-184429357	3012	F	-0.3275	0.00684	0.214
ENSG00000128050.4	PAICS	ENST00000264221.2	chr4:57302653-57302911	738	F	-0.00866	0.00699	0.217
ENSG00000128050.4	PAICS	ENST00000514888.1	chr4:57302653-57302911	746	F	-0.0084	0.00707	0.217
ENSG00000176531.5	PHLDB3	ENST00000292140.5	chr19:44008207-44008554	533	T	-0.00159	0.00717	0.218
ENSG00000128050.4	PAICS	ENST00000505164.1	chr4:57302653-57302911	735	F	-0.00538	0.00744	0.222
ENSG00000181885.11	CLDN7	ENST00000360325.6	chr17:7339746-7340086	-173234	F	0.89167	0.00745	0.222
ENSG00000128050.4	PAICS	ENST00000399688.3	chr4:57302653-57302911	349	F	0	0.0076	0.225
ENSG00000107242.11	PIP5K1B	ENST00000265382.3	chr9:71319953-71320301	-315	F	0	0.00775	0.225
ENSG00000107242.11	PIP5K1B	ENST00000419747.2	chr9:71319953-71320301	-315	F	0	0.00775	0.225
ENSG00000140396.7	NCOA2	ENST00000520416.1	chr8:71315521-71315825	-699	F	0.00236	0.00809	0.232
ENSG00000125772.7	GPCPD1	ENST00000378992.2	chr20:5590956-5591294	378	F	0	0.00855	0.243
ENSG00000214530.2	STARD10	ENST00000537947.1	chr11:72492709-72493056	0	T	0.79766	0.00932	0.26
ENSG00000119787.9	ATL2	ENST00000402054.1	chr2:38604692-38604864	-1326	F	0.01943	0.00939	0.26
ENSG00000118263.10	KLF7	ENST00000426163.1	chr2:208028810-208029086	1824	F	0.07817	0.00939	0.26
ENSG00000169379.11	ARL13B	ENST00000486562.1	chr3:93692654-93693003	-6055	F	0.41294	0.00953	0.262
ENSG00000168556.5	ING2	ENST00000434682.2	chr4:184429159-184429357	1799	T	-0.06078	0.00972	0.263
ENSG00000170291.7	C17orf81	ENST00000396627.1	chr17:7339746-7340086	184195	F	-0.87757	0.00976	0.263
ENSG00000197620.6	CXorf40A	ENST00000448332.1	chrX:148621902-148622125	-857	F	0.00011	0.0102	0.272
ENSG00000119787.9	ATL2	ENST00000452935.2	chr2:38604692-38604864	-956	F	0.00113	0.0103	0.273
ENSG00000184500.10	PROS1	ENST00000348974.4	chr3:93692654-93693003	0	T	0.76969	0.0105	0.274
ENSG00000113558.12	SKP1	ENST00000523359.1	chr5:133512267-133512448	-1006	F	-0.00159	0.0105	0.274
ENSG00000112242.9	E2F3	ENST00000346618.3	chr6:20403541-20403890	1143	F	-0.00407	0.0111	0.287
ENSG00000113302.4	IL12B	ENST00000231228.2	chr5:158758497-158758845	-602	F	0	0.0116	0.293
ENSG00000043143.14	PHF15	ENST00000432594.1	chr5:133891739-133892088	30373	F	0.67912	0.0116	0.293
ENSG00000043143.14	PHF15	ENST00000361895.2	chr5:133891739-133892088	30376	F	0.67912	0.0116	0.293
ENSG00000125772.7	GPCPD1	ENST00000379019.4	chr20:5590956-5591294	378	F	-0.87265	0.0119	0.298
ENSG00000043143.14	PHF15	ENST00000515554.1	chr5:133891739-133892088	30387	F	0.66894	0.0123	0.301
ENSG00000043143.14	PHF15	ENST00000282605.4	chr5:133891739-133892088	30392	F	0.66878	0.0123	0.301
ENSG00000043143.14	PHF15	ENST00000448712.2	chr5:133891739-133892088	30394	F	0.66878	0.0123	0.301
ENSG00000197620.6	CXorf40A	ENST00000428236.1	chrX:148621902-148622125	-1439	F	-0.00483	0.0125	0.304
ENSG00000226763.2	SRRM5	ENST00000526798.1	chr19:44008207-44008554	-92215	F	-0.79727	0.0129	0.307
ENSG00000118263.10	KLF7	ENST00000423015.1	chr2:208028810-208029086	2485	F	0.05954	0.0129	0.307
ENSG00000186635.9	ARAP1	ENST00000393609.3	chr11:72492709-72493056	-29261	F	0.65603	0.013	0.307
ENSG00000147862.9	NFIB	ENST00000397575.3	chr9:14433830-14434177	-119762	F	0.82223	0.0132	0.31
ENSG00000169379.11	ARL13B	ENST00000539730.1	chr3:93692654-93693003	-5996	F	0.30034	0.0135	0.313
ENSG00000255414.1	AP000783.2	ENST00000525757.1	chr11:123300648-123300995	-24111	F	0.61556	0.0135	0.313
ENSG00000169379.11	ARL13B	ENST00000394222.3	chr3:93692654-93693003	-5990	F	0.29361	0.0138	0.313
ENSG00000124444.10	ZNF576	ENST00000336564.4	chr19:44008207-44008554	-92203	F	-0.78846	0.0138	0.313
ENSG00000169379.11	ARL13B	ENST00000478400.1	chr3:93692654-93693003	-5983	F	0.29243	0.0138	0.313
ENSG00000169379.11	ARL13B	ENST00000535334.1	chr3:93692654-93693003	-5980	F	0.28781	0.014	0.314
ENSG00000160789.14	LMNA	ENST00000368299.3	chr1:156046569-156046902	-37611	F	-0.66723	0.0149	0.322
ENSG00000160789.14	LMNA	ENST00000292302.7	chr1:156046569-156046902	-37615	F	-0.66668	0.015	0.322
ENSG00000160789.14	LMNA	ENST00000478063.2	chr1:156046569-156046902	-37600	F	-0.66619	0.015	0.322
ENSG00000160789.14	LMNA	ENST00000469565.2	chr1:156046569-156046902	-37602	F	-0.66614	0.015	0.322
ENSG00000160789.14	LMNA	ENST00000368300.4	chr1:156046569-156046902	-37596	F	-0.66581	0.015	0.322
ENSG00000143375.9	CGN	ENST00000427934.1	chr1:151431430-151431727	-52136	F	-0.71357	0.0151	0.322
ENSG00000143375.9	CGN	ENST00000271636.7	chr1:151431430-151431727	-52146	F	-0.71352	0.0151	0.322
ENSG00000161958.4	FGF11	ENST00000293829.3	chr17:7339746-7340086	-2603	F	0.03167	0.0154	0.327
ENSG00000160789.14	LMNA	ENST00000361308.4	chr1:156046569-156046902	-37559	F	-0.65896	0.0158	0.333
ENSG00000118263.10	KLF7	ENST00000457962.1	chr2:208028810-208029086	2905	F	0.03333	0.0165	0.344
ENSG00000241769.2	AF011889.4	ENST00000431214.1	chrX:148621902-148622125	-1065	F	0	0.0166	0.344
ENSG00000124444.10	ZNF576	ENST00000529930.1	chr19:44008207-44008554	-92193	F	-0.76585	0.0166	0.344
ENSG00000118263.10	KLF7	ENST00000421199.1	chr2:208028810-208029086	2884	F	0.03012	0.0167	0.344
ENSG00000214530.2	STARD10	ENST00000535054.1	chr11:72492709-72493056	0	T	0.72535	0.018	0.359
ENSG00000214530.2	STARD10	ENST00000545082.1	chr11:72492709-72493056	0	T	0.72483	0.018	0.359
ENSG00000116586.7	LAMTOR2	ENST00000487106.1	chr1:156046569-156046902	21693	F	-0.53365	0.018	0.359
ENSG00000132698.9	RAB25	ENST00000463614.1	chr1:156046569-156046902	15589	F	0.45968	0.018	0.359
ENSG00000132698.9	RAB25	ENST00000361084.5	chr1:156046569-156046902	15618	F	0.45954	0.018	0.359
ENSG00000132698.9	RAB25	ENST00000487325.1	chr1:156046569-156046902	15572	F	0.44762	0.0188	0.367
ENSG00000006837.6	CDKL3	ENST00000518409.1	chr5:133891739-133892088	-185004	F	-0.82334	0.0189	0.367
ENSG00000006837.6	CDKL3	ENST00000435240.2	chr5:133891739-133892088	-185006	F	-0.82334	0.0189	0.367
ENSG00000006837.6	CDKL3	ENST00000523054.1	chr5:133891739-133892088	-185007	F	-0.82334	0.0189	0.367
ENSG00000119787.9	ATL2	ENST00000332337.4	chr2:38604692-38604864	-1326	F	0	0.0194	0.371
ENSG00000119787.9	ATL2	ENST00000546051.1	chr2:38604692-38604864	-1326	F	0	0.0194	0.371
ENSG00000187866.5	FAM122A	ENST00000394264.3	chr9:71319953-71320301	-74663	F	-0.71914	0.0197	0.375
ENSG00000134318.8	ROCK2	ENST00000315872.6	chr2:11514725-11515074	-30014	F	0.57307	0.02	0.378
ENSG00000187866.5	FAM122A	ENST00000377279.3	chr9:71319953-71320301	-74680	F	-0.71527	0.0201	0.378
ENSG00000006837.6	CDKL3	ENST00000521755.1	chr5:133891739-133892088	-185044	F	-0.81499	0.0202	0.378
ENSG00000254726.1	MEX3A	ENST00000442784.1	chr1:156046569-156046902	4593	T	0.07209	0.0206	0.382
ENSG00000196642.8	C9orf86	ENST00000471502.1	chr9:139440564-139440913	-253905	F	-0.83727	0.0208	0.385
ENSG00000232648.3	RP11-367N14.2	ENST00000457303.3	chr4:184429159-184429357	-3512	F	0.01798	0.0214	0.392
ENSG00000124444.10	ZNF576	ENST00000528387.1	chr19:44008207-44008554	-92173	F	-0.73195	0.0215	0.392
ENSG00000230898.1	RP11-9L18.3	ENST00000451784.1	chr1:166135873-166136085	-1541	F	0	0.0221	0.401
ENSG00000174718.7	C12orf35	ENST00000381054.3	chr12:32112646-32112812	-2611	F	-0.00139	0.023	0.414
ENSG00000151612.10	ZNF827	ENST00000508784.1	chr4:146857833-146858177	1610	F	0	0.0236	0.424
ENSG00000175893.6	ZDHHC21	ENST00000497966.1	chr9:14433830-14434177	259086	F	0.82712	0.0243	0.432
ENSG00000224376.1	AC017104.6	ENST00000454416.1	chr2:232230026-232230295	-28198	F	-0.51094	0.0246	0.435
ENSG00000175826.6	CTDNEP1	ENST00000318988.5	chr17:7339746-7340086	-184466	F	-0.79038	0.0247	0.435
ENSG00000237886.1	RP11-611D20.2	ENST00000450304.1	chr9:139440564-139440913	-2669	F	0.00072	0.0249	0.435
ENSG00000113558.12	SKP1	ENST00000520417.1	chr5:133512267-133512448	-1811	F	0	0.025	0.435
ENSG00000115053.10	NCL	ENST00000322732.7	chr2:232230026-232230295	98916	F	-0.71183	0.0263	0.454
ENSG00000115053.10	NCL	ENST00000392033.4	chr2:232230026-232230295	98900	F	-0.71111	0.0264	0.454
ENSG00000197256.5	KANK2	ENST00000355150.5	chr19:11308437-11308721	-3171	F	0.00191	0.0267	0.457
ENSG00000114861.13	FOXP1	ENST00000470112.1	chr3:71803327-71803485	-448161	F	0.8561	0.0272	0.464
ENSG00000178700.3	DHFRL1	ENST00000314636.2	chr3:93692654-93693003	88828	F	-0.68563	0.0279	0.471
ENSG00000170175.5	CHRNB1	ENST00000306071.2	chr17:7339746-7340086	-8294	F	0.13323	0.0279	0.471
ENSG00000160789.14	LMNA	ENST00000368301.2	chr1:156046569-156046902	-5467	F	-0.03167	0.0281	0.472
ENSG00000160789.14	LMNA	ENST00000495341.1	chr1:156046569-156046902	-5489	F	-0.03032	0.0285	0.472
ENSG00000160789.14	LMNA	ENST00000392355.4	chr1:156046569-156046902	-37690	F	-0.5352	0.0285	0.472
ENSG00000160789.14	LMNA	ENST00000502751.1	chr1:156046569-156046902	-5462	F	-0.02857	0.0287	0.472
ENSG00000197620.6	CXorf40A	ENST00000359293.5	chrX:148621902-148622125	-4899	F	-0.01565	0.0289	0.472
ENSG00000147862.9	NFIB	ENST00000397581.2	chr9:14433830-14434177	-119312	F	0.72041	0.029	0.472
ENSG00000140526.10	ABHD2	ENST00000415713.2	chr15:89600745-89601093	-30618	F	0.48371	0.0291	0.472
ENSG00000197620.6	CXorf40A	ENST00000422892.2	chrX:148621902-148622125	-3941	F	0.00393	0.0292	0.472
ENSG00000148484.12	RSU1	ENST00000377921.3	chr10:17065418-17065758	-206036	F	0.77471	0.0303	0.486
ENSG00000170175.5	CHRNB1	ENST00000536404.1	chr17:7339746-7340086	-8755	F	0.11831	0.0304	0.486
ENSG00000143442.15	POGZ	ENST00000450842.1	chr1:151431430-151431727	-3757	F	0.00196	0.0306	0.486
ENSG00000143442.15	POGZ	ENST00000533461.1	chr1:151431430-151431727	-3897	F	-0.00243	0.0308	0.487
ENSG00000187079.10	TEAD1	ENST00000361905.4	chr11:12399352-12399682	-296287	F	0.8104	0.0314	0.494
ENSG00000182134.11	TDRKH	ENST00000368824.3	chr1:151431430-151431727	331271	F	-0.82045	0.0319	0.499
ENSG00000170881.4	RNF139	ENST00000303545.3	chr8:125462455-125462787	-24192	F	-0.39829	0.032	0.499
ENSG00000182134.11	TDRKH	ENST00000458431.2	chr1:151431430-151431727	331254	F	-0.81876	0.0323	0.502
ENSG00000181798.2	C2orf52	ENST00000313064.2	chr2:232230026-232230295	148755	F	-0.72647	0.0335	0.516
ENSG00000205544.2	C17orf61	ENST00000302422.3	chr17:7339746-7340086	-32290	F	-0.45658	0.0337	0.516
ENSG00000178694.4	NSUN3	ENST00000468555.1	chr3:93692654-93693003	-88902	F	-0.65335	0.0338	0.516
ENSG00000182134.11	TDRKH	ENST00000368823.1	chr1:151431430-151431727	331237	F	-0.80825	0.0352	0.536
ENSG00000187838.9	PLSCR3	ENST00000535512.1	chr17:7339746-7340086	-32330	F	-0.43377	0.0365	0.552
ENSG00000116586.7	LAMTOR2	ENST00000368305.4	chr1:156046569-156046902	22026	F	-0.32636	0.0371	0.558
ENSG00000214530.2	STARD10	ENST00000538536.1	chr11:72492709-72493056	11632	F	0.13063	0.0372	0.558
ENSG00000182134.11	TDRKH	ENST00000368825.3	chr1:151431430-151431727	331228	F	-0.79981	0.0375	0.559
ENSG00000187838.9	PLSCR3	ENST00000324822.10	chr17:7339746-7340086	-41903	F	0.48015	0.0383	0.568
ENSG00000187838.9	PLSCR3	ENST00000380658.4	chr17:7339746-7340086	-41914	F	0.47921	0.0385	0.568
ENSG00000006837.6	CDKL3	ENST00000521755.1	chr5:133512267-133512448	194247	F	-0.73674	0.0389	0.572
ENSG00000105755.2	ETHE1	ENST00000292147.1	chr19:44008207-44008554	22842	F	0.31939	0.0391	0.572
ENSG00000160789.14	LMNA	ENST00000470835.1	chr1:156046569-156046902	-5520	F	-0.00309	0.0399	0.579
ENSG00000242498.2	C15orf38	ENST00000357484.5	chr15:90605622-90605970	-149434	F	-0.69797	0.04	0.579
ENSG00000214530.2	STARD10	ENST00000334805.6	chr11:72492709-72493056	11670	F	0.10038	0.0406	0.586
ENSG00000227512.1	RP11-413M3.4	ENST00000439501.1	chr9:139440564-139440913	3231	F	0	0.0408	0.586
ENSG00000006837.6	CDKL3	ENST00000523054.1	chr5:133512267-133512448	194284	F	-0.72715	0.0417	0.587
ENSG00000006837.6	CDKL3	ENST00000435240.2	chr5:133512267-133512448	194285	F	-0.72715	0.0417	0.587
ENSG00000006837.6	CDKL3	ENST00000518409.1	chr5:133512267-133512448	194287	F	-0.72715	0.0417	0.587
ENSG00000196189.6	SEMA4A	ENST00000355014.2	chr1:156046569-156046902	-72908	F	0.5756	0.0417	0.587
ENSG00000177984.6	LCN15	ENST00000316144.5	chr9:139440564-139440913	218052	F	-0.74145	0.0418	0.587
ENSG00000089195.10	TRMT6	ENST00000453074.2	chr20:5590956-5591294	339757	F	-0.78681	0.0421	0.589
ENSG00000168010.6	ATG16L2	ENST00000534905.1	chr11:72492709-72493056	-32395	F	-0.38165	0.0431	0.599
ENSG00000168010.6	ATG16L2	ENST00000537143.1	chr11:72492709-72493056	-32414	F	-0.3738	0.0441	0.609
ENSG00000169379.11	ARL13B	ENST00000492165.1	chr3:93692654-93693003	-6129	F	0.00255	0.0444	0.609
ENSG00000168010.6	ATG16L2	ENST00000540567.1	chr11:72492709-72493056	-32421	F	-0.37148	0.0444	0.609
ENSG00000152700.8	SAR1B	ENST00000505758.1	chr5:133891739-133892088	76371	F	-0.56355	0.0456	0.623
ENSG00000147862.9	NFIB	ENST00000397579.2	chr9:14433830-14434177	-119249	F	0.63949	0.046	0.624
ENSG00000107223.8	EDF1	ENST00000224073.1	chr9:139440564-139440913	319825	F	0.76997	0.0462	0.624
ENSG00000107223.8	EDF1	ENST00000371649.1	chr9:139440564-139440913	319824	F	0.76979	0.0463	0.624
ENSG00000186635.9	ARAP1	ENST00000334211.8	chr11:72492709-72493056	-59306	F	-0.50562	0.0465	0.625
ENSG00000186635.9	ARAP1	ENST00000359373.5	chr11:72492709-72493056	11588	F	0.05514	0.0469	0.626
ENSG00000152700.8	SAR1B	ENST00000439578.1	chr5:133891739-133892088	76376	F	-0.55462	0.0474	0.626
ENSG00000107223.8	EDF1	ENST00000371648.4	chr9:139440564-139440913	319805	F	0.76533	0.0476	0.626
ENSG00000214530.2	STARD10	ENST00000536377.1	chr11:72492709-72493056	11581	F	0.05088	0.0477	0.626
ENSG00000214530.2	STARD10	ENST00000539138.1	chr11:72492709-72493056	3955	F	0	0.0478	0.626
ENSG00000214530.2	STARD10	ENST00000542989.1	chr11:72492709-72493056	3956	F	0	0.0479	0.626
ENSG00000108671.4	PSMD11	ENST00000469475.1	chr17:30813796-30814109	6700	F	-0.00229	0.0481	0.626
ENSG00000165794.4	SLC39A2	ENST00000298681.4	chr14:21457862-21458211	-9238	F	-0.01706	0.0482	0.626
ENSG00000132698.9	RAB25	ENST00000473336.1	chr1:156046569-156046902	15395	F	0.11633	0.0487	0.629
ENSG00000230952.1	AC099344.2	ENST00000430897.1	chr2:11514725-11515074	-8963	T	0.00659	0.054	0.675
ENSG00000135931.12	ARMC9	ENST00000488821.1	chr2:232230026-232230295	-4990	T	0	0.0572	0.693
ENSG00000247011.2	RP11-700H6.1	ENST00000501718.2	chr17:49031635-49031969	-9561	T	0.00272	0.063	0.724
ENSG00000043143.14	PHF15	ENST00000453515.1	chr5:133891739-133892088	11613	T	0.00805	0.0648	0.728
ENSG00000107242.11	PIP5K1B	ENST00000541509.1	chr9:71319953-71320301	-274	T	0.62594	0.0801	0.728
ENSG00000177613.7	CSTF2T	ENST00000331173.4	chr10:53459300-53459501	0	T	0.33261	0.0823	0.728
ENSG00000125772.7	GPCPD1	ENST00000481690.1	chr20:5590956-5591294	276	T	-0.60877	0.0886	0.733
ENSG00000182054.4	IDH2	ENST00000540499.1	chr15:90605622-90605970	37883	T	0.10765	0.103	0.76
ENSG00000237886.1	RP11-611D20.2	ENST00000429224.1	chr9:139440564-139440913	0	T	0.28972	0.136	0.823
ENSG00000118508.4	RAB32	ENST00000367495.3	chr6:146864300-146864545	-284	T	0.49556	0.138	0.827
ENSG00000165792.10	METT11D1	ENST00000536700.1	chr14:21457862-21458211	0	T	0.28205	0.14	0.827
ENSG00000181284.2	TMEM102	ENST00000396568.1	chr17:7339746-7340086	973	T	-0.64939	0.142	0.827
ENSG00000140526.10	ABHD2	ENST00000352732.4	chr15:89600745-89601093	-30312	T	-0.0002	0.175	0.874
ENSG00000066735.9	KIF26A	ENST00000315264.6	chr14:104637737-104638085	32367	T	-0.00113	0.176	0.874
ENSG00000173876.7	RP11-631M21.2	ENST00000272035.4	chr10:120031-120229	-23978	T	0	0.194	0.908
ENSG00000113558.12	SKP1	ENST00000517625.1	chr5:133512267-133512448	0	T	0.01291	0.197	0.908
ENSG00000140396.7	NCOA2	ENST00000452400.2	chr8:71315521-71315825	215	T	-0.36093	0.198	0.908
ENSG00000254667.1	AP000783.1	ENST00000533341.1	chr11:123300648-123300995	-63	T	0.20892	0.209	0.921
ENSG00000188859.5	FAM78B	ENST00000354422.3	chr1:166135873-166136085	0	T	0.01888	0.21	0.922
ENSG00000165792.10	METT11D1	ENST00000339374.5	chr14:21457862-21458211	0	T	0.08564	0.23	0.939
ENSG00000107611.9	CUBN	ENST00000545090.1	chr10:17065418-17065758	0	T	0.07223	0.235	0.939
ENSG00000237520.1	RP11-443B7.2	ENST00000423963.1	chr1:235043778-235044126	-48852	T	-0.00137	0.237	0.939
ENSG00000251642.1	RP11-600L4.1	ENST00000506010.1	chr4:38320851-38321040	32236	T	0	0.242	0.939
ENSG00000197256.5	KANK2	ENST00000432929.2	chr19:11308437-11308721	-194	T	0.26295	0.245	0.939
ENSG00000197620.6	CXorf40A	ENST00000431132.2	chrX:148621902-148622125	2	T	0.00486	0.25	0.939
ENSG00000147862.9	NFIB	ENST00000380934.4	chr9:14433830-14434177	-34848	T	0	0.256	0.939
ENSG00000143442.15	POGZ	ENST00000540984.1	chr1:151431430-151431727	0	T	-0.01751	0.264	0.939
ENSG00000143442.15	POGZ	ENST00000531094.1	chr1:151431430-151431727	0	T	-0.0166	0.266	0.939
ENSG00000143442.15	POGZ	ENST00000491586.1	chr1:151431430-151431727	0	T	-0.01219	0.274	0.939
ENSG00000174718.7	C12orf35	ENST00000535606.1	chr12:32112646-32112812	49	T	-0.00754	0.275	0.939
ENSG00000249738.2	AC008697.1	ENST00000515337.1	chr5:158758497-158758845	0	T	-0.02665	0.28	0.939
ENSG00000118263.10	KLF7	ENST00000458272.1	chr2:208028810-208029086	-1209	T	0.49176	0.299	0.941
ENSG00000183665.4	TRMT12	ENST00000328599.3	chr8:125462455-125462787	-261	T	0.23016	0.308	0.947
ENSG00000128050.4	PAICS	ENST00000512576.1	chr4:57302653-57302911	335	T	-0.26098	0.313	0.95
ENSG00000176749.3	CDK5R1	ENST00000313401.3	chr17:30813796-30814109	159	T	0.13553	0.314	0.951
ENSG00000119787.9	ATL2	ENST00000406122.1	chr2:38604692-38604864	-265	T	0.12662	0.361	0.961
ENSG00000163412.7	EIF4E3	ENST00000448225.1	chr3:71803327-71803485	47	T	0	0.368	0.961
ENSG00000150630.2	VEGFC	ENST00000280193.2	chr4:177713955-177714296	-74	T	0.01698	0.372	0.961
ENSG00000143442.15	POGZ	ENST00000368863.2	chr1:151431430-151431727	0	T	0	0.394	0.968
ENSG00000143442.15	POGZ	ENST00000409503.1	chr1:151431430-151431727	0	T	0	0.394	0.968
ENSG00000143442.15	POGZ	ENST00000533351.1	chr1:151431430-151431727	0	T	0	0.394	0.968
ENSG00000112242.9	E2F3	ENST00000535432.1	chr6:20403541-20403890	-144	T	-0.03103	0.418	0.968
ENSG00000165792.10	METT11D1	ENST00000382985.3	chr14:21457862-21458211	0	T	0	0.432	0.968
ENSG00000154229.6	PRKCA	ENST00000284384.5	chr17:64536565-64536874	-100183	T	0	0.523	0.968
ENSG00000227360.1	RP11-518I13.1	ENST00000449072.1	chr6:156938575-156938896	-117670	T	0	0.576	0.968
ENSG00000180447.5	GAS1	ENST00000298743.7	chr9:89562560-89562906	-456	T	0.04119	0.614	0.968
ENSG00000151612.10	ZNF827	ENST00000379448.4	chr4:146857833-146858177	-1446	T	0.19433	0.636	0.968
ENSG00000250488.1	RP11-6C14.1	ENST00000513718.1	chr4:160868212-160868489	-169276	T	0	0.705	0.968
ENSG00000197702.6	PARVA	ENST00000539723.1	chr11:12399352-12399682	242	T	0	0.717	0.968
ENSG00000182054.4	IDH2	ENST00000540499.1	chr15:90605622-90605970	-37883	T	0.06181	0.807	0.968
ENSG00000176531.5	PHLDB3	ENST00000292140.5	chr19:44008207-44008554	533	T	0.00016	0.82	0.968
ENSG00000168556.5	ING2	ENST00000434682.2	chr4:184429159-184429357	-1799	T	-0.05243	0.822	0.968
ENSG00000254726.1	MEX3A	ENST00000442784.1	chr1:156046569-156046902	-4593	T	0.03706	0.848	0.968
ENSG00000043143.14	PHF15	ENST00000453515.1	chr5:133891739-133892088	-11613	T	0.01135	0.908	0.968
ENSG00000247011.2	RP11-700H6.1	ENST00000501718.2	chr17:49031635-49031969	9561	T	0.00404	0.94	0.968
ENSG00000230952.1	AC099344.2	ENST00000430897.1	chr2:11514725-11515074	8963	T	0.00306	0.945	0.968
ENSG00000237520.1	RP11-443B7.2	ENST00000423963.1	chr1:235043778-235044126	48852	T	-0.00145	0.955	0.968
ENSG00000140526.10	ABHD2	ENST00000352732.4	chr15:89600745-89601093	30312	T	-0.0014	0.955	0.968
ENSG00000066735.9	KIF26A	ENST00000315264.6	chr14:104637737-104638085	-32367	T	-0.00042	0.969	0.968
ENSG00000173876.7	RP11-631M21.2	ENST00000272035.4	chr10:120031-120229	23978	T	0	1	0.968
ENSG00000154229.6	PRKCA	ENST00000284384.5	chr17:64536565-64536874	100183	T	0	1	0.968
ENSG00000147862.9	NFIB	ENST00000380934.4	chr9:14433830-14434177	34848	T	0	1	0.968
ENSG00000227360.1	RP11-518I13.1	ENST00000449072.1	chr6:156938575-156938896	117670	T	0	1	0.968
ENSG00000135931.12	ARMC9	ENST00000488821.1	chr2:232230026-232230295	4990	T	0	1	0.968
ENSG00000251642.1	RP11-600L4.1	ENST00000506010.1	chr4:38320851-38321040	-32236	T	0	1	0.968
ENSG00000250488.1	RP11-6C14.1	ENST00000513718.1	chr4:160868212-160868489	169276	T	0	1	0.968

## Sheet: Suppl Table 5  T Gene inherited
Supplementary Table 5. Predicted Target Genes and Correlation Metrics for inherited cCREs from T-Gene Analysis. Only the most linked gene (lowest CnD p-value ) for each cCRE is displayed. Only genes with a combined distance and correlation and Distance p-value (CnD p-value) < 0.05 and q-value > 0.1 were used as input for scRNAseq analyses see (Suppl Table 9 ).
Gene_ID	Gene_Name	TSS_ID	RE_Locus	Distance	Closest_TSS	Correlation	CnD_P_Value	Q_Value
ENSG00000133477.11	FAM83F	ENST00000333407.5	chr22:40390596-40390930	-23	T	0.99947	6.37e-08	0.00294
ENSG00000165029.11	ABCA1	ENST00000423487.2	chr9:107690313-107690661	0	T	0.99844	1.97e-07	0.00455
ENSG00000146038.6	DCDC2	ENST00000451359.1	chr6:24358067-24358416	0	T	0.99723	6.58e-07	0.0101
ENSG00000117152.9	RGS4	ENST00000531057.1	chr1:163038974-163039322	0	T	0.99349	1.39e-06	0.0119
ENSG00000117152.9	RGS4	ENST00000491263.1	chr1:163038974-163039322	0	T	0.99347	1.39e-06	0.0119
ENSG00000154760.9	SLFN13	ENST00000285013.6	chr17:33775666-33776011	0	T	0.99108	1.55e-06	0.0119
ENSG00000107551.13	RASSF4	ENST00000427758.1	chr10:45455247-45455498	0	T	0.95963	2.9e-06	0.0134
ENSG00000121005.4	CRISPLD1	ENST00000262207.4	chr8:75896604-75896951	0	T	0.96139	3.77e-06	0.0158
ENSG00000166900.10	STX3	ENST00000437946.2	chr11:59523258-59523483	409	F	0.98424	5.63e-06	0.0178
ENSG00000120885.12	CLU	ENST00000380446.5	chr8:27472163-27472508	0	T	0.93759	6.88e-06	0.0178
ENSG00000120885.12	CLU	ENST00000523589.1	chr8:27472163-27472508	0	T	0.93757	6.88e-06	0.0178
ENSG00000120885.12	CLU	ENST00000522413.1	chr8:27472163-27472508	0	T	0.93756	6.88e-06	0.0178
ENSG00000120885.12	CLU	ENST00000523396.1	chr8:27472163-27472508	0	T	0.93756	6.88e-06	0.0178
ENSG00000105369.4	CD79A	ENST00000444740.1	chr19:42377204-42377553	-3637	T	0.99797	7.33e-06	0.0178
ENSG00000168917.8	TMEM22	ENST00000393079.3	chr3:136537718-136538066	0	T	0.93177	7.73e-06	0.0178
ENSG00000160867.9	FGFR4	ENST00000507708.1	chr5:176514077-176514426	160	F	0.95091	9.37e-06	0.0196
ENSG00000136842.8	TMOD1	ENST00000259365.3	chr9:100263471-100263652	-269	F	0.94647	1.13e-05	0.0201
ENSG00000078269.9	SYNJ2	ENST00000355585.4	chr6:158402508-158402852	-67	F	0.91495	1.43e-05	0.0241
ENSG00000163235.11	TGFA	ENST00000394241.3	chr2:70781163-70781483	-58	F	0.90812	1.46e-05	0.0241
ENSG00000121068.7	TBX2	ENST00000424871.2	chr17:59476937-59477276	0	T	0.87873	1.88e-05	0.029
ENSG00000185033.9	SEMA4B	ENST00000332496.5	chr15:90728335-90728679	183	T	0.91716	1.99e-05	0.0296
ENSG00000069998.8	CECR5	ENST00000399852.3	chr22:17639567-17639881	264	F	0.92344	2.06e-05	0.0297
ENSG00000118292.4	C1orf54	ENST00000369099.3	chr1:150244991-150245166	0	T	0.80524	2.42e-05	0.0328
ENSG00000147526.13	TACC1	ENST00000276520.8	chr8:38644824-38645084	43	T	0.85493	2.64e-05	0.0347
ENSG00000249121.1	RP11-81F11.3	ENST00000344312.4	chr13:33859809-33860153	0	T	0.83189	3.44e-05	0.0412
ENSG00000255242.1	C14orf169	ENST00000531973.1	chr14:73957459-73957808	0	T	-0.83234	3.48e-05	0.0412
ENSG00000179833.3	SERTAD2	ENST00000313349.3	chr2:64880828-64881175	0	T	0.82871	3.6e-05	0.0412
ENSG00000164741.9	DLC1	ENST00000511869.1	chr8:13424124-13424472	-51728	F	0.99852	3.9e-05	0.0419
ENSG00000164741.9	DLC1	ENST00000276297.4	chr8:13424124-13424472	-51729	F	0.99852	3.9e-05	0.0419
ENSG00000119681.6	LTBP2	ENST00000261978.3	chr14:75079245-75079594	-211	T	0.86315	4.99e-05	0.0523
ENSG00000143761.8	ARF1	ENST00000470558.1	chr1:228270149-228270498	0	T	0.7833	5.59e-05	0.0573
ENSG00000104140.6	RHOV	ENST00000220507.4	chr15:41166326-41166672	0	T	0.76842	6.3e-05	0.0598
ENSG00000100528.6	CNIH	ENST00000395573.3	chr14:54907647-54907908	145	T	0.8134	6.51e-05	0.0598
ENSG00000105928.8	DFNA5	ENST00000409970.1	chr7:24797413-24797733	-319	F	0.85725	6.58e-05	0.0598
ENSG00000182400.9	TRAPPC6B	ENST00000347691.4	chr14:39639506-39639841	0	T	0.75262	6.95e-05	0.0598
ENSG00000142945.8	KIF2C	ENST00000452259.1	chr1:45205219-45205568	0	T	0.75301	7.19e-05	0.0598
ENSG00000150991.9	UBC	ENST00000544656.1	chr12:125399350-125399593	-154	F	0.77141	9.44e-05	0.0676
ENSG00000181104.6	F2R	ENST00000319211.4	chr5:76011609-76011919	0	T	0.69795	9.53e-05	0.0676
ENSG00000204767.3	FAM196B	ENST00000523970.1	chr5:169407642-169407847	-190	F	0.77065	0.0001	0.0698
ENSG00000120833.7	SOCS2	ENST00000539385.1	chr12:93965270-93965616	441	F	0.83473	0.000108	0.0698
ENSG00000179820.10	MYADM	ENST00000336967.3	chr19:54369486-54369704	0	T	0.61875	0.000109	0.0698
ENSG00000099917.11	MED15	ENST00000541476.1	chr22:20862153-20862403	0	T	0.64187	0.000109	0.0698
ENSG00000177108.4	ZDHHC22	ENST00000319374.4	chr14:77647857-77648206	-39723	F	0.99695	0.000111	0.0698
ENSG00000133256.8	PDE6B	ENST00000471824.2	chr4:657305-657654	0	T	0.69069	0.000111	0.0698
ENSG00000123607.10	TTC21B	ENST00000243344.7	chr2:166809792-166810063	290	T	0.7974	0.000112	0.0698
ENSG00000129245.6	FXR2	ENST00000250113.6	chr17:7518282-7518627	-67	T	0.72645	0.000117	0.0721
ENSG00000117697.10	NSL1	ENST00000422588.2	chr1:212964705-212965027	92	F	0.72642	0.000123	0.0748
ENSG00000103534.9	TMC5	ENST00000541464.1	chr16:19421798-19422146	0	T	0.65133	0.00014	0.0767
ENSG00000233757.2	AC092835.2	ENST00000425953.1	chr2:95872691-95872906	-377	T	0.78336	0.000143	0.0767
ENSG00000171680.14	PLEKHG5	ENST00000377725.1	chr1:6550512-6550847	0	T	0.63785	0.000146	0.0767
ENSG00000076043.5	REXO2	ENST00000539119.1	chr11:114310577-114310925	273	F	0.76939	0.00015	0.0767
ENSG00000135482.1	ZC3H10	ENST00000257940.1	chr12:56511785-56512134	0	T	-0.63823	0.000151	0.0767
ENSG00000160785.7	SLC25A44	ENST00000468973.1	chr1:156163605-156163954	0	T	-0.6267	0.000161	0.0767
ENSG00000114013.11	CD86	ENST00000482356.1	chr3:121977678-121977935	180974	F	0.99826	0.000161	0.0767
ENSG00000136867.6	SLC31A2	ENST00000490809.1	chr9:115913052-115913401	0	T	0.62419	0.000164	0.0767
ENSG00000104921.9	FCER2	ENST00000346664.4	chr19:7405961-7406307	360725	F	0.99882	0.000169	0.0767
ENSG00000111725.5	PRKAB1	ENST00000539596.1	chr12:120105513-120105862	0	T	-0.6058	0.00018	0.0767
ENSG00000179841.6	AKAP5	ENST00000394718.2	chr14:64931973-64932319	0	T	0.59794	0.000186	0.0767
ENSG00000178372.6	CALML5	ENST00000380332.3	chr10:5484054-5484397	57136	F	0.99632	0.000194	0.0767
ENSG00000135926.6	TMBIM1	ENST00000543441.1	chr2:219157130-219157468	0	T	0.58333	0.000196	0.0767
ENSG00000135926.6	TMBIM1	ENST00000413976.1	chr2:219157130-219157468	0	T	0.58299	0.000196	0.0767
ENSG00000180098.5	TRNAU1AP	ENST00000373830.3	chr1:28878999-28879244	-353	T	-0.74126	0.000198	0.0767
ENSG00000115963.8	RND3	ENST00000443732.2	chr2:151342619-151342945	1234	F	0.84584	0.000203	0.0767
ENSG00000115963.8	RND3	ENST00000375734.2	chr2:151342619-151342945	1236	F	0.84584	0.000203	0.0767
ENSG00000254093.2	PINX1	ENST00000426190.2	chr8:10697256-10697605	0	T	0.58108	0.000204	0.0767
ENSG00000117569.12	PTBP2	ENST00000236228.6	chr1:97187099-97187447	0	T	-0.5782	0.000206	0.0767
ENSG00000134297.5	PLEKHA8P1	ENST00000256692.5	chr12:45610234-45610438	-445	F	-0.75302	0.000206	0.0767
ENSG00000136878.7	USP20	ENST00000472108.1	chr9:132552631-132552973	-88679	F	0.99732	0.000207	0.0767
ENSG00000099956.12	SMARCB1	ENST00000407082.3	chr22:24129370-24129712	172	T	0.69002	0.000208	0.0767
ENSG00000102871.10	TRADD	ENST00000345057.3	chr16:67194050-67194372	-261	F	0.71667	0.000211	0.0767
ENSG00000167549.13	CORO6	ENST00000467534.1	chr17:27944122-27944470	5390	F	0.92543	0.000216	0.0767
ENSG00000177108.4	ZDHHC22	ENST00000319374.4	chr14:77537022-77537365	70769	F	0.99646	0.000224	0.077
ENSG00000168763.10	CNNM3	ENST00000305510.3	chr2:97484978-97485327	2991	T	0.89151	0.000232	0.0776
ENSG00000168763.10	CNNM3	ENST00000424641.1	chr2:97484978-97485327	2993	F	0.89151	0.000232	0.0776
ENSG00000168763.10	CNNM3	ENST00000377060.3	chr2:97484978-97485327	2996	F	0.89151	0.000232	0.0776
ENSG00000136938.7	ANP32B	ENST00000447173.1	chr9:100746776-100746935	1138	F	0.81805	0.000242	0.0797
ENSG00000154102.5	C16orf74	ENST00000284245.3	chr16:85783809-85784153	536	T	0.7524	0.000262	0.0839
ENSG00000196812.4	ZSCAN16	ENST00000340487.4	chr6:28092191-28092536	0	T	0.51886	0.000269	0.0856
ENSG00000166831.3	RBPMS2	ENST00000300069.3	chr15:65032659-65032992	34778	T	0.98347	0.00028	0.0884
ENSG00000169567.7	HINT1	ENST00000506908.1	chr5:130500849-130501198	0	T	-0.50486	0.000289	0.09
ENSG00000187699.6	C2orf88	ENST00000340623.4	chr2:191044900-191045248	-341	F	0.67992	0.000321	0.0992
ENSG00000135315.7	KIAA1009	ENST00000497936.1	chr6:84937780-84937944	-454	F	-0.68509	0.000323	0.0992
ENSG00000104432.7	IL7	ENST00000263851.4	chr8:79717250-79717482	276	F	0.62976	0.000333	0.101
ENSG00000133056.8	PIK3C2B	ENST00000415899.1	chr1:204463036-204463382	470	F	0.70318	0.00034	0.101
ENSG00000214194.4	AC073346.2	ENST00000413744.1	chr7:112758501-112758850	0	T	-0.45605	0.00035	0.103
ENSG00000075239.9	ACAT1	ENST00000299355.6	chr11:107992043-107992392	0	T	0.45316	0.000354	0.103
ENSG00000185187.7	SIGIRR	ENST00000397632.3	chr11:397258-397458	19867	F	0.95467	0.000361	0.103
ENSG00000137868.11	STRA6	ENST00000536129.1	chr15:74465372-74465572	29524	F	0.96861	0.000366	0.103
ENSG00000175121.7	WFDC5	ENST00000307971.4	chr20:43639843-43640186	103617	F	0.99597	0.000372	0.103
ENSG00000114757.13	PEX5L	ENST00000472994.1	chr3:179754701-179755049	0	T	0.43682	0.000375	0.103
ENSG00000168056.9	LTBP3	ENST00000532661.1	chr11:65307642-65307989	165	F	0.57962	0.000376	0.103
ENSG00000104290.6	FZD3	ENST00000523546.1	chr8:28351533-28351882	0	T	0.43032	0.000386	0.105
ENSG00000029363.11	BCLAF1	ENST00000530767.1	chr6:136610329-136610677	242	T	-0.61062	0.000389	0.105
ENSG00000230590.1	MIR374AHG	ENST00000429124.1	chrX:73512306-73512655	0	T	-0.4279	0.000389	0.105
ENSG00000165819.6	METTL3	ENST00000440691.2	chr14:21979432-21979781	0	T	-0.42343	0.000396	0.105
ENSG00000165819.6	METTL3	ENST00000538267.1	chr14:21979432-21979781	0	T	-0.42339	0.000396	0.105
ENSG00000165819.6	METTL3	ENST00000545788.1	chr14:21979432-21979781	0	T	-0.42289	0.000396	0.105
ENSG00000005448.12	WDR54	ENST00000469321.1	chr2:74649290-74649639	0	T	0.42083	0.0004	0.105
ENSG00000172543.3	CTSW	ENST00000526034.1	chr11:65812605-65812953	165276	F	0.99694	0.000412	0.105
ENSG00000172543.3	CTSW	ENST00000528419.1	chr11:65812605-65812953	165283	F	0.99694	0.000412	0.105
ENSG00000120129.4	DUSP1	ENST00000457103.2	chr5:172197582-172197928	270	T	0.61011	0.000413	0.105
ENSG00000169826.6	CSGALNACT2	ENST00000374466.3	chr10:43633449-43633642	-292	T	0.58324	0.000419	0.105
ENSG00000125534.4	PPDPF	ENST00000473620.1	chr20:62152337-62152662	207	T	0.57018	0.000428	0.106
ENSG00000083817.6	ZNF416	ENST00000196489.2	chr19:58090212-58090561	0	T	0.39911	0.000432	0.106
ENSG00000181192.7	DHTKD1	ENST00000263035.4	chr10:12110670-12111019	0	T	-0.38379	0.000456	0.109
ENSG00000111802.8	TDP2	ENST00000478507.1	chr6:24667064-24667413	0	T	0.38163	0.000459	0.109
ENSG00000186153.10	WWOX	ENST00000408984.2	chr16:78133226-78133575	0	T	-0.38062	0.000461	0.109
ENSG00000129116.13	PALLD	ENST00000507735.1	chr4:169753078-169753345	0	T	0.3052	0.000462	0.109
ENSG00000101452.8	DHX35	ENST00000441485.1	chr20:37591131-37591423	108	T	0.46597	0.000475	0.109
ENSG00000159216.12	RUNX1	ENST00000358356.5	chr21:36262313-36262658	-1326	F	0.76298	0.000478	0.109
ENSG00000119866.15	BCL11A	ENST00000489516.2	chr2:60777403-60777748	301	T	0.59272	0.000479	0.109
ENSG00000143753.8	DEGS1	ENST00000391877.3	chr1:224370672-224371019	0	T	0.36296	0.000487	0.109
ENSG00000159069.9	FBXW5	ENST00000491246.1	chr9:139838718-139838938	134	F	0.44893	0.000489	0.109
ENSG00000171388.9	APLN	ENST00000429967.1	chrX:128739449-128739774	49140	F	0.97454	0.00049	0.109
ENSG00000204580.6	DDR1	ENST00000515219.1	chr6:30852623-30852964	295	F	0.58415	0.000492	0.109
ENSG00000124772.7	CPNE5	ENST00000244751.2	chr6:36807705-36807967	0	T	0.27347	0.0005	0.109
ENSG00000135316.12	SYNCRIP	ENST00000369622.3	chr6:86352549-86352896	107	F	-0.47385	0.000505	0.109
ENSG00000127528.4	KLF2	ENST00000248071.4	chr19:16435761-16435911	110	T	0.36612	0.000511	0.109
ENSG00000160679.8	C1orf77	ENST00000403433.1	chr1:153606762-153607107	206	F	0.53005	0.000525	0.109
ENSG00000196365.5	LONP1	ENST00000360614.2	chr19:5720501-5720749	-325	F	-0.56167	0.000532	0.109
ENSG00000063761.10	ADCK1	ENST00000393639.3	chr14:78266645-78266940	182	T	-0.49499	0.000536	0.109
ENSG00000204070.5	SYS1	ENST00000426004.1	chr20:43991610-43991956	0	T	-0.33277	0.000536	0.109
ENSG00000136156.7	ITM2B	ENST00000378549.5	chr13:48807509-48807830	170	T	0.49289	0.000542	0.109
ENSG00000117616.11	C1orf63	ENST00000243189.6	chr1:25574263-25574442	-278	T	0.51526	0.000544	0.109
ENSG00000132002.2	DNAJB1	ENST00000254322.1	chr19:14616345-14616504	12697	F	0.91604	0.000548	0.109
ENSG00000135747.7	ZNF670	ENST00000366503.2	chr1:247241984-247242333	0	T	0.32532	0.000553	0.109
ENSG00000150938.5	CRIM1	ENST00000280527.2	chr2:36584735-36584935	1666	F	0.76295	0.000555	0.109
ENSG00000110514.13	MADD	ENST00000534808.1	chr11:47291029-47291378	0	T	0.32226	0.000558	0.109
ENSG00000170027.4	YWHAG	ENST00000307630.3	chr7:75988535-75988883	-187	T	-0.49403	0.000585	0.109
ENSG00000189171.8	S100A13	ENST00000392623.1	chr1:153599896-153600235	-152	T	0.46307	0.000595	0.11
ENSG00000230082.1	AC018809.6	ENST00000431558.1	chr3:9988845-9989189	0	T	0.2944	0.000601	0.11
ENSG00000116237.9	ICMT	ENST00000489498.1	chr1:6295890-6296238	0	T	-0.29652	0.000604	0.11
ENSG00000160783.12	PMF1	ENST00000497069.1	chr1:156182845-156183137	28	T	-0.27987	0.000635	0.112
ENSG00000156011.11	PSD3	ENST00000440756.2	chr8:18871852-18872198	-656	F	0.63444	0.000641	0.112
ENSG00000053900.6	ANAPC4	ENST00000315368.3	chr4:25378611-25378959	0	T	-0.27308	0.000648	0.112
ENSG00000077150.12	NFKB2	ENST00000471698.1	chr10:104159052-104159221	3602	F	0.81649	0.000678	0.115
ENSG00000138134.7	STAMBPL1	ENST00000461650.1	chr10:90692346-90692682	52365	F	0.96354	0.000693	0.117
ENSG00000158769.11	F11R	ENST00000537746.1	chr1:160990498-160990796	90	T	0.34392	0.000694	0.117
ENSG00000153560.7	UBP1	ENST00000283629.3	chr3:33481528-33481700	170	F	0.35732	0.000707	0.117
ENSG00000230937.3	CTA-55I10.1	ENST00000458250.1	chr1:209775541-209775693	172892	F	0.99489	0.00072	0.118
ENSG00000197965.7	MPZL1	ENST00000487858.1	chr1:167690303-167690526	0	T	0.08359	0.000748	0.119
ENSG00000233611.2	AC079135.1	ENST00000483218.1	chr2:237076955-237077270	847	F	0.63792	0.000749	0.119
ENSG00000103415.6	HMOX2	ENST00000219700.5	chr16:4526225-4526571	0	T	0.22043	0.000751	0.119
ENSG00000002834.11	LASP1	ENST00000318008.5	chr17:37023742-37024082	-2174	T	-0.75486	0.000764	0.119
ENSG00000166557.7	TMED3	ENST00000299705.5	chr15:79603326-79603675	0	T	-0.21358	0.000771	0.119
ENSG00000197826.7	C4orf22	ENST00000508675.1	chr4:81257031-81257194	108	F	0.22803	0.000798	0.119
ENSG00000154080.7	CHST9	ENST00000284224.7	chr18:25185135-25185483	-419846	F	0.9975	0.000809	0.119
ENSG00000125733.10	TRIP10	ENST00000313285.6	chr19:6738477-6738825	-866	F	0.62844	0.000813	0.119
ENSG00000078804.8	TP53INP2	ENST00000414082.1	chr20:33293119-33293463	580	T	0.57023	0.000815	0.119
ENSG00000110047.11	EHD1	ENST00000541001.1	chr11:64646080-64646429	0	T	0.19007	0.000825	0.119
ENSG00000157193.10	LRP8	ENST00000306052.6	chr1:53793611-53793960	0	T	-0.18746	0.000831	0.119
ENSG00000103160.5	HSDL1	ENST00000434463.2	chr16:84178641-84178989	0	T	-0.18632	0.000832	0.119
ENSG00000074582.8	BCS1L	ENST00000430322.1	chr2:219523355-219523670	0	T	0.15173	0.000837	0.119
ENSG00000181873.8	C1orf69	ENST00000366711.3	chr1:228353177-228353523	0	T	0.18118	0.00084	0.119
ENSG00000105810.5	CDK6	ENST00000424848.2	chr7:92463143-92463490	2418	F	0.75408	0.000841	0.119
ENSG00000184886.2	PIGW	ENST00000429467.1	chr17:34890606-34890955	0	T	0.18284	0.000842	0.119
ENSG00000177542.6	SLC25A22	ENST00000530360.1	chr11:796193-796541	0	T	0.1782	0.000851	0.12
ENSG00000246323.2	RP11-325L7.1	ENST00000500267.2	chr5:137368325-137368577	0	T	0.06446	0.000893	0.12
ENSG00000168763.10	CNNM3	ENST00000305510.3	chr2:97481771-97482120	0	T	0.16164	0.000894	0.12
ENSG00000168763.10	CNNM3	ENST00000377060.3	chr2:97481771-97482120	0	T	0.16164	0.000894	0.12
ENSG00000168763.10	CNNM3	ENST00000424641.1	chr2:97481771-97482120	0	T	0.16164	0.000894	0.12
ENSG00000141456.8	AC091153.1	ENST00000436683.2	chr17:4607049-4607302	117	T	-0.26132	0.00091	0.12
ENSG00000101608.5	MYL12A	ENST00000217652.3	chr18:3247627-3247926	99	T	0.2668	0.000912	0.12
ENSG00000180694.9	TMEM64	ENST00000458549.2	chr8:91658524-91658842	-213	F	-0.3797	0.000918	0.12
ENSG00000139998.8	RAB15	ENST00000533601.1	chr14:65438884-65439189	0	T	0.10725	0.000923	0.12
ENSG00000131067.12	GGT7	ENST00000336431.5	chr20:33460566-33460893	0	T	0.12868	0.000924	0.12
ENSG00000238005.1	RP11-443B7.1	ENST00000418557.1	chr1:235099638-235099840	0	T	0.0188	0.000926	0.12
ENSG00000025772.6	TOMM34	ENST00000372810.4	chr20:43588916-43589264	0	T	0.14226	0.000941	0.121
ENSG00000218510.3	RP1-224A6.4	ENST00000416769.1	chr1:22351802-22352064	0	T	-0.05496	0.000958	0.121
ENSG00000158321.11	AUTS2	ENST00000476695.1	chr7:69029843-69030192	-259420	F	0.99516	0.000961	0.121
ENSG00000100991.5	TRPC4AP	ENST00000451813.1	chr20:33680499-33680848	0	T	0.11938	0.00101	0.122
ENSG00000100991.5	TRPC4AP	ENST00000541994.1	chr20:33680499-33680848	0	T	0.11901	0.00101	0.122
ENSG00000106009.11	BAAT1	ENST00000340611.4	chr7:2595310-2595657	0	T	0.11642	0.00101	0.122
ENSG00000140519.5	RHCG	ENST00000536247.1	chr15:90039493-90039800	0	T	-0.07871	0.00102	0.123
ENSG00000233008.1	RP11-475O6.1	ENST00000419733.1	chr1:84326541-84326846	0	T	0.06967	0.00104	0.124
ENSG00000100401.14	RANGAP1	ENST00000356244.3	chr22:41681406-41681754	501	F	0.49096	0.00104	0.124
ENSG00000198431.10	TXNRD1	ENST00000525566.1	chr12:104609363-104609707	0	T	0.09275	0.00107	0.125
ENSG00000198431.10	TXNRD1	ENST00000429002.2	chr12:104609363-104609707	0	T	0.0926	0.00107	0.125
ENSG00000169946.9	ZFPM2	ENST00000520492.1	chr8:106331561-106331903	0	T	0.09227	0.00107	0.125
ENSG00000196586.7	MYO6	ENST00000369981.3	chr6:76457061-76457396	-1513	T	0.65523	0.00108	0.126
ENSG00000196586.7	MYO6	ENST00000369985.3	chr6:76458729-76459077	0	T	-0.09319	0.00108	0.126
ENSG00000143373.12	ZNF687	ENST00000443959.1	chr1:151253764-151254113	0	T	0.08924	0.0011	0.126
ENSG00000162413.11	KLHL21	ENST00000377658.4	chr1:6661099-6661445	1484	F	0.64987	0.0011	0.126
ENSG00000132141.8	CCT6B	ENST00000436961.2	chr17:33288129-33288329	136	F	-0.18152	0.00111	0.127
ENSG00000229891.1	Z83851.1	ENST00000432473.1	chr22:42692441-42692775	72399	F	0.95583	0.00113	0.128
ENSG00000167962.7	ZNF598	ENST00000431526.1	chr16:2065439-2065785	-5676	F	0.80292	0.00116	0.128
ENSG00000241186.2	AC104304.1	ENST00000542931.1	chr3:46704568-46704917	88523	F	0.96232	0.00116	0.128
ENSG00000124570.11	SERPINB6	ENST00000380546.3	chr6:2988697-2989045	-16878	F	0.88609	0.00117	0.128
ENSG00000174567.7	GOLT1A	ENST00000308302.3	chr1:204317956-204318295	-134736	F	0.97612	0.00118	0.129
ENSG00000154102.5	C16orf74	ENST00000284245.3	chr16:85786675-85787024	-1986	T	0.67905	0.00118	0.129
ENSG00000168273.3	C3orf78	ENST00000491607.1	chr3:52567798-52568122	0	T	0.04636	0.0012	0.13
ENSG00000173218.9	VANGL1	ENST00000369510.3	chr1:116184649-116184978	37	T	0.09584	0.00123	0.131
ENSG00000230084.1	RP4-613B23.1	ENST00000445452.1	chr3:42695860-42696100	0	T	0.00796	0.00123	0.131
ENSG00000226174.1	RP11-521B24.1	ENST00000451127.1	chr14:105864655-105864992	0	T	-0.04655	0.00125	0.131
ENSG00000159713.5	TPPP3	ENST00000290942.4	chr16:67427295-67427644	0	T	-0.053	0.00125	0.131
ENSG00000163344.5	PMVK	ENST00000368467.3	chr1:154909977-154910229	-510	T	-0.42039	0.00129	0.133
ENSG00000134686.11	PHC2	ENST00000484692.1	chr1:33896528-33896876	0	T	0.04379	0.0013	0.133
ENSG00000140332.8	TLE3	ENST00000317509.7	chr15:70390143-70390488	0	T	0.04184	0.0013	0.133
ENSG00000157601.9	MX1	ENST00000490220.1	chr21:42792310-42792628	79	F	0.12636	0.0013	0.133
ENSG00000137288.4	C6orf125	ENST00000374214.3	chr6:33679363-33679704	0	T	-0.04047	0.0013	0.133
ENSG00000140691.10	ARMC5	ENST00000408912.2	chr16:31469395-31469741	0	T	0.04077	0.00131	0.133
ENSG00000115760.9	BIRC6	ENST00000421745.2	chr2:32581936-32582285	0	T	-0.04041	0.00132	0.133
ENSG00000135655.8	USP15	ENST00000312635.5	chr12:62653874-62654223	0	T	0.03989	0.00133	0.133
ENSG00000135655.8	USP15	ENST00000537297.1	chr12:62653874-62654223	0	T	0.03988	0.00133	0.133
ENSG00000135655.8	USP15	ENST00000280377.4	chr12:62653874-62654223	0	T	0.0394	0.00133	0.133
ENSG00000156381.3	ANKRD9	ENST00000286918.3	chr14:102976086-102976432	0	T	-0.03817	0.00133	0.133
ENSG00000086062.7	B4GALT1	ENST00000541701.1	chr9:33161626-33161885	5299	F	0.77968	0.00133	0.133
ENSG00000139263.6	LRIG3	ENST00000433272.1	chr12:59313078-59313421	0	T	0.03524	0.00134	0.133
ENSG00000170270.3	C14orf142	ENST00000306954.3	chr14:93673290-93673639	0	T	0.03751	0.00134	0.133
ENSG00000133107.10	TRPC4	ENST00000447043.1	chr13:38444412-38444750	0	T	0.03092	0.00135	0.133
ENSG00000118689.9	FOXO3	ENST00000540258.1	chr6:108910633-108910980	0	T	0.03517	0.00135	0.133
ENSG00000037757.8	MRI1	ENST00000319545.7	chr19:13874985-13875150	-187	T	-0.14752	0.00137	0.133
ENSG00000109756.4	RAPGEF2	ENST00000503328.1	chr4:160150369-160150714	0	T	0.03014	0.00138	0.133
ENSG00000146090.11	RASGEF1C	ENST00000361132.4	chr5:179636057-179636351	0	T	-0.012	0.00139	0.133
ENSG00000074416.8	MGLL	ENST00000476654.1	chr3:127510174-127510368	-70	T	0.0242	0.0014	0.133
ENSG00000074416.8	MGLL	ENST00000265052.5	chr3:127510174-127510368	31333	F	0.90834	0.0014	0.133
ENSG00000164916.7	FOXK1	ENST00000328914.4	chr7:4722225-4722533	285	F	0.29386	0.0014	0.133
ENSG00000139287.6	TPH2	ENST00000266669.4	chr12:72332524-72332872	0	T	0.02696	0.00142	0.133
ENSG00000092621.6	PHGDH	ENST00000535091.1	chr1:120254903-120255244	317	T	-0.31749	0.00143	0.133
ENSG00000172986.8	GXYLT2	ENST00000389617.4	chr3:72937374-72937631	150	T	0.14465	0.00143	0.133
ENSG00000124535.9	WRNIP1	ENST00000380773.4	chr6:2791371-2791717	25723	F	0.89668	0.00143	0.133
ENSG00000099385.5	BCL7C	ENST00000215115.2	chr16:30905306-30905655	0	T	-0.02578	0.00144	0.133
ENSG00000226602.1	RP11-216B9.8	ENST00000427246.1	chr9:131448382-131448590	-30	T	0.00461	0.00146	0.134
ENSG00000188004.5	C1orf204	ENST00000491974.1	chr1:159824525-159824874	0	T	0.02231	0.00147	0.134
ENSG00000143153.7	ATP1B1	ENST00000367815.3	chr1:169079008-169079353	3450	F	0.71829	0.00147	0.134
ENSG00000198561.8	CTNND1	ENST00000530068.1	chr11:57549018-57549365	0	T	0.02211	0.00147	0.134
ENSG00000143772.5	ITPKB	ENST00000366784.1	chr1:226926198-226926537	487	F	0.38919	0.00148	0.135
ENSG00000072609.10	CHFR	ENST00000542714.1	chr12:133481342-133481689	0	T	-0.02003	0.00149	0.135
ENSG00000072609.10	CHFR	ENST00000541817.1	chr12:133481342-133481689	0	T	-0.02	0.00149	0.135
ENSG00000168000.9	BSCL2	ENST00000533982.1	chr11:62726389-62726600	-251568	F	0.98688	0.0015	0.135
ENSG00000018625.8	ATP1A2	ENST00000368084.3	chr1:159906333-159906677	-178871	F	0.97636	0.00152	0.135
ENSG00000018625.8	ATP1A2	ENST00000538123.1	chr1:159906333-159906677	-178872	F	0.97635	0.00152	0.135
ENSG00000018625.8	ATP1A2	ENST00000478587.1	chr1:159906333-159906677	-178876	F	0.97639	0.00152	0.135
ENSG00000018625.8	ATP1A2	ENST00000361216.3	chr1:159906333-159906677	-178886	F	0.97628	0.00152	0.135
ENSG00000018625.8	ATP1A2	ENST00000392233.3	chr1:159906333-159906677	-178890	F	0.97635	0.00152	0.135
ENSG00000139405.7	C12orf52	ENST00000266813.6	chr12:113591076-113591403	-32152	F	0.90462	0.00153	0.135
ENSG00000137834.8	SMAD6	ENST00000288840.4	chr15:66999795-67000097	5125	F	0.75886	0.00154	0.136
ENSG00000188987.2	HIST1H4D	ENST00000340756.2	chr6:26189172-26189521	0	T	0.01669	0.00154	0.136
ENSG00000100299.11	ARSA	ENST00000395621.3	chr22:51066498-51066845	0	T	-0.01367	0.00158	0.139
ENSG00000162909.11	CAPN2	ENST00000540186.1	chr1:223919208-223919428	18994	F	0.87098	0.00159	0.139
ENSG00000167074.9	TEF	ENST00000406644.3	chr22:41763198-41763528	0	T	-0.00871	0.00161	0.14
ENSG00000164619.4	BMPER	ENST00000436222.1	chr7:33945006-33945262	0	T	-0.00104	0.00162	0.141
ENSG00000170927.9	PKHD1	ENST00000371117.3	chr6:51952373-51952706	0	T	-0.00774	0.00165	0.141
ENSG00000136003.10	ISCU	ENST00000539593.1	chr12:108957288-108957637	902	T	-0.4793	0.00166	0.141
ENSG00000184792.10	OSBP2	ENST00000446658.2	chr22:31090720-31091062	0	T	0.00694	0.00172	0.143
ENSG00000184792.10	OSBP2	ENST00000382310.3	chr22:31090720-31091062	0	T	0.00689	0.00172	0.143
ENSG00000110092.2	CCND1	ENST00000542897.1	chr11:69458053-69458399	2129	F	0.62109	0.00173	0.143
ENSG00000112715.16	VEGFA	ENST00000520265.1	chr6:43741067-43741414	-676	T	0.40101	0.00179	0.146
ENSG00000255484.1	RP11-65M17.1	ENST00000525984.1	chr11:112426459-112426775	0	T	-0.00249	0.00182	0.147
ENSG00000106066.8	CPVL	ENST00000265394.5	chr7:29142275-29142436	43717	F	0.90947	0.00185	0.149
ENSG00000137504.8	CREBZF	ENST00000398294.2	chr11:85375172-85375520	180	T	0.1277	0.00186	0.149
ENSG00000112787.7	FBRSL1	ENST00000542061.1	chr12:133083369-133083717	0	T	0.00397	0.00187	0.15
ENSG00000244187.2	TMEM141	ENST00000483187.1	chr9:139686132-139686479	308	F	0.21953	0.00189	0.151
ENSG00000138030.8	KHK	ENST00000429697.1	chr2:27319227-27319563	9565	F	0.79892	0.0019	0.151
ENSG00000162595.4	DIRAS3	ENST00000370981.1	chr1:68517245-68517593	0	T	-0.00342	0.00191	0.151
ENSG00000188738.8	FSIP2	ENST00000424728.1	chr2:186603596-186603938	0	T	-0.00295	0.00191	0.151
ENSG00000232427.2	PRR24	ENST00000422073.2	chr19:47742843-47743191	-34986	F	0.89476	0.00195	0.152
ENSG00000082701.9	GSK3B	ENST00000316626.5	chr3:119812688-119813035	-175	F	0.10593	0.00195	0.152
ENSG00000159199.7	ATP5G1	ENST00000513781.1	chr17:46955582-46955826	-14390	F	-0.8324	0.00197	0.153
ENSG00000125817.6	CENPB	ENST00000536335.1	chr20:3788063-3788411	-22313	F	0.86417	0.00201	0.154
ENSG00000070159.7	PTPN3	ENST00000374541.1	chr9:112203023-112203371	57215	F	0.91961	0.00201	0.154
ENSG00000083838.9	ZNF446	ENST00000335841.3	chr19:58987317-58987666	-129	T	0.05509	0.00204	0.155
ENSG00000172348.10	RCAN2	ENST00000371374.1	chr6:46459027-46459360	0	T	-0.00094	0.00207	0.157
ENSG00000124942.7	AHNAK	ENST00000533743.1	chr11:62323989-62324331	-270	T	0.15685	0.00208	0.158
ENSG00000130147.10	SH3BP4	ENST00000392011.2	chr2:235790332-235790679	-69938	F	0.9261	0.00212	0.16
ENSG00000159335.9	PTMS	ENST00000436860.1	chr12:6876051-6876350	340	F	0.18124	0.00214	0.16
ENSG00000187123.10	LYPD6	ENST00000409381.1	chr2:150186202-150186407	-92	T	0.003	0.00214	0.16
ENSG00000054523.11	KIF1B	ENST00000355249.4	chr1:10270330-10270679	-85	T	0.01554	0.00223	0.165
ENSG00000180917.11	FTSJD1	ENST00000338099.4	chr16:71323187-71323536	0	T	0.0002	0.00224	0.165
ENSG00000157703.10	SVOPL	ENST00000421622.1	chr7:138571256-138571604	-185159	F	0.96228	0.00224	0.165
ENSG00000197381.9	ADARB1	ENST00000462214.1	chr21:46572186-46572531	78418	F	0.92818	0.00225	0.165
ENSG00000184005.8	ST6GALNAC3	ENST00000328299.3	chr1:76620373-76620682	79969	T	0.92503	0.00243	0.175
ENSG00000184005.8	ST6GALNAC3	ENST00000394994.3	chr1:76620373-76620682	79984	F	0.92495	0.00243	0.175
ENSG00000256610.1	AL645608.2	ENST00000534924.1	chr1:856447-856770	-51	T	-0.00183	0.00244	0.175
ENSG00000197283.7	SYNGAP1	ENST00000449372.1	chr6:33712023-33712370	323991	F	0.97902	0.00244	0.175
ENSG00000164733.13	CTSB	ENST00000415599.2	chr8:11711476-11711780	-441	T	0.19506	0.00244	0.175
ENSG00000013523.3	ANGEL1	ENST00000414937.2	chr14:77277398-77277725	1479	T	-0.46734	0.00254	0.178
ENSG00000159788.13	RGS12	ENST00000538395.1	chr4:3389682-3390017	1621	T	0.48645	0.00254	0.178
ENSG00000198252.6	STYX	ENST00000354586.4	chr14:53197313-53197467	413	T	0.11766	0.00255	0.178
ENSG00000130640.8	TUBGCP2	ENST00000470829.1	chr10:135070982-135071331	51307	F	0.89803	0.00258	0.179
ENSG00000175048.11	ZDHHC14	ENST00000538483.1	chr6:157802983-157803197	395	T	0.12078	0.00259	0.179
ENSG00000169139.6	UBE2V2	ENST00000523432.1	chr8:48909872-48910072	-10903	F	-0.77603	0.00259	0.179
ENSG00000169139.6	UBE2V2	ENST00000521346.1	chr8:48909872-48910072	-10907	F	-0.77603	0.00259	0.179
ENSG00000158435.3	C2orf29	ENST00000289382.3	chr2:101869576-101869922	312	F	0.10771	0.0026	0.179
ENSG00000250722.1	SEPP1	ENST00000513303.1	chr5:42950693-42951042	-138698	F	-0.94686	0.00261	0.179
ENSG00000174574.9	AKIRIN1	ENST00000432648.3	chr1:39558054-39558357	101159	F	0.93193	0.00264	0.179
ENSG00000214934.3	CTD-2560E9.2	ENST00000399269.2	chr11:45167656-45167870	-324	T	0.06948	0.00264	0.179
ENSG00000238167.1	AC061992.2	ENST00000439041.1	chr17:76310314-76310661	-1149	T	0.39953	0.00268	0.18
ENSG00000214999.3	AC129492.6	ENST00000399413.3	chr17:7983223-7983559	423	T	-0.16031	0.00268	0.18
ENSG00000175756.8	AURKAIP1	ENST00000489799.1	chr1:1307443-1307777	2747	T	-0.56793	0.00278	0.184
ENSG00000251063.1	RP11-35J23.5	ENST00000506028.1	chr10:98135169-98135513	-60	T	0.00042	0.00286	0.185
ENSG00000142765.12	SYTL1	ENST00000475199.1	chr1:27714914-27715257	36951	F	0.87115	0.00287	0.185
ENSG00000152464.8	RPP38	ENST00000378203.1	chr10:15001869-15002216	-136963	F	-0.94152	0.00289	0.185
ENSG00000129245.6	FXR2	ENST00000250113.6	chr17:7517580-7517801	414	T	0.08554	0.00298	0.185
ENSG00000151353.10	TMEM18	ENST00000405941.3	chr2:676111-676455	249	T	-0.0292	0.00309	0.185
ENSG00000123836.10	PFKFB2	ENST00000367079.2	chr1:207197686-207198035	-28621	F	0.8431	0.00322	0.189
ENSG00000204219.5	TCEA3	ENST00000374601.3	chr1:23748263-23748606	2594	F	0.52086	0.00326	0.19
ENSG00000182782.6	GPR109A	ENST00000328880.5	chr12:122922127-122922463	265427	F	0.95978	0.00327	0.19
ENSG00000165417.5	GTF2A1	ENST00000434192.1	chr14:81688066-81688314	-491	T	-0.09473	0.00334	0.193
ENSG00000179833.3	SERTAD2	ENST00000313349.3	chr2:64872281-64872531	8516	F	0.71144	0.00334	0.193
ENSG00000165698.11	C9orf9	ENST00000350499.6	chr9:135753565-135753914	-371	F	0.05846	0.00339	0.195
ENSG00000155465.11	SLC7A7	ENST00000397532.3	chr14:22940561-22940874	344138	F	0.9673	0.00343	0.195
ENSG00000155465.11	SLC7A7	ENST00000397528.3	chr14:22940561-22940874	344198	F	0.9673	0.00343	0.195
ENSG00000173660.7	UQCRH	ENST00000311672.5	chr1:46767656-46767954	-1349	F	-0.35219	0.0035	0.197
ENSG00000122694.10	GLIPR2	ENST00000497814.1	chr9:36136285-36136455	-275	T	-0.00456	0.00352	0.198
ENSG00000136925.9	TSTD2	ENST00000375172.1	chr9:100361017-100361323	34260	F	0.84856	0.00355	0.198
ENSG00000080224.13	EPHA6	ENST00000470610.2	chr3:96532732-96533081	-344	T	-0.03689	0.00356	0.198
ENSG00000140262.10	TCF12	ENST00000343827.2	chr15:57873176-57873351	361521	F	0.9673	0.00358	0.199
ENSG00000059758.2	CDK17	ENST00000542666.1	chr12:96793003-96793232	620	T	0.12205	0.00361	0.2
ENSG00000104221.7	BRF2	ENST00000520601.1	chr8:37709020-37709267	-1664	F	-0.38387	0.00369	0.202
ENSG00000089159.9	PXN	ENST00000540221.1	chr12:120663783-120664121	181	T	0.00197	0.00378	0.204
ENSG00000127603.15	MACF1	ENST00000524432.1	chr1:39598669-39599017	27586	T	0.82312	0.00386	0.206
ENSG00000150625.12	GPM6A	ENST00000507540.1	chr4:176812952-176813301	-47	T	0	0.00386	0.206
ENSG00000018189.7	RUFY3	ENST00000417478.2	chr4:71571175-71571514	657	T	-0.13065	0.00392	0.207
ENSG00000137868.11	STRA6	ENST00000536129.1	chr15:74163429-74163771	331325	F	0.96054	0.00396	0.209
ENSG00000114867.14	EIF4G1	ENST00000319274.6	chr3:183959618-183959967	-73004	F	0.89047	0.004	0.21
ENSG00000163072.10	NOSTRIN	ENST00000317647.7	chr2:169988473-169988715	329545	F	0.95936	0.00403	0.21
ENSG00000117069.9	ST6GALNAC5	ENST00000438953.2	chr1:77333894-77334243	717	T	-0.13519	0.00413	0.213
ENSG00000121316.5	PLBD1	ENST00000540572.1	chr12:14707263-14707585	-83	T	0	0.00421	0.215
ENSG00000113645.7	WWC1	ENST00000265293.4	chr5:167722621-167722970	3965	F	0.54486	0.00422	0.215
ENSG00000162390.12	ACOT11	ENST00000498228.1	chr1:55013336-55013539	-354	T	-0.00516	0.00427	0.217
ENSG00000165272.8	AQP3	ENST00000463983.1	chr9:33415524-33415873	31707	F	0.82437	0.00431	0.218
ENSG00000134013.9	LOXL2	ENST00000524168.1	chr8:23161539-23161888	99701	F	0.90181	0.00439	0.22
ENSG00000169689.9	STRA13	ENST00000392359.3	chr17:79779648-79779996	200798	F	0.9373	0.00441	0.22
ENSG00000179588.2	ZFPM1	ENST00000319555.1	chr16:88571822-88572171	52097	T	0.86095	0.00443	0.22
ENSG00000197813.3	AC011450.1	ENST00000358234.3	chr19:49842596-49842945	614	T	0.07291	0.00446	0.221
ENSG00000178852.9	C17orf57	ENST00000435993.2	chr17:45356588-45356936	25325	F	0.79799	0.00451	0.222
ENSG00000104093.7	DMXL2	ENST00000251076.4	chr15:51914123-51914272	677	T	-0.05348	0.00459	0.224
ENSG00000103111.9	MON1B	ENST00000320859.6	chr16:77246430-77246595	21594	F	0.77692	0.00469	0.226
ENSG00000177374.6	HIC1	ENST00000399849.2	chr17:1929314-1929610	-28783	F	0.80648	0.0047	0.226
ENSG00000121858.6	TNFSF10	ENST00000241261.2	chr3:172313905-172314229	-72608	F	0.87766	0.00479	0.229
ENSG00000127399.10	LRRC61	ENST00000471872.1	chr7:149580503-149580816	-438912	F	0.96272	0.00479	0.229
ENSG00000089159.9	PXN	ENST00000538144.1	chr12:120662766-120662966	-586	T	0.02707	0.00482	0.229
ENSG00000144909.7	OSBPL11	ENST00000296220.5	chr3:125314229-125314577	-295	T	-0.00232	0.00482	0.229
ENSG00000100522.3	GNPNAT1	ENST00000216410.3	chr14:53521731-53521897	-263412	F	-0.94498	0.00486	0.23
ENSG00000007062.7	PROM1	ENST00000508167.1	chr4:16266446-16266790	-181091	F	0.92509	0.005	0.234
ENSG00000177732.6	SOX12	ENST00000544632.1	chr20:290576-290917	-15290	F	0.72789	0.00501	0.234
ENSG00000108651.3	UTP6	ENST00000261708.3	chr17:30438473-30438818	-209742	F	-0.93212	0.00503	0.234
ENSG00000135931.12	ARMC9	ENST00000359743.5	chr2:232055323-232055506	-7836	F	0.62292	0.00514	0.237
ENSG00000099817.6	POLR2E	ENST00000215587.6	chr19:1101747-1102091	-6356	F	-0.58749	0.00516	0.237
ENSG00000070814.11	TCOF1	ENST00000445265.2	chr5:149920521-149920860	183292	F	-0.92356	0.00519	0.238
ENSG00000100429.13	HDAC10	ENST00000483222.1	chr22:50690608-50690915	-937	F	0.09922	0.00546	0.245
ENSG00000071127.11	WDR1	ENST00000502702.1	chr4:10090943-10091287	27064	F	0.782	0.00549	0.245
ENSG00000084234.10	APLP2	ENST00000529483.1	chr11:130016258-130016590	36936	F	0.81076	0.00564	0.248
ENSG00000115306.10	SPTBN1	ENST00000333896.5	chr2:54787547-54787762	2016	T	-0.29743	0.00564	0.248
ENSG00000065357.12	DGKA	ENST00000331886.4	chr12:56349902-56350234	24956	F	0.7693	0.00567	0.249
ENSG00000147443.7	DOK2	ENST00000523932.1	chr8:21779535-21779879	-8348	F	0.61373	0.00574	0.251
ENSG00000147443.7	DOK2	ENST00000518197.1	chr8:21779535-21779879	-8361	F	0.61385	0.00574	0.251
ENSG00000130024.10	PHF10	ENST00000366780.4	chr6:170122775-170123113	914	T	0.08031	0.00576	0.251
ENSG00000185022.7	MAFF	ENST00000441709.1	chr22:38614582-38614930	16579	F	0.717	0.00578	0.251
ENSG00000204347.2	BTBD17	ENST00000375366.2	chr17:72364418-72364761	-6460	F	-0.56429	0.00585	0.253
ENSG00000141526.9	SLC16A3	ENST00000392341.1	chr17:80188745-80189088	2452	F	0.34684	0.00585	0.253
ENSG00000159216.12	RUNX1	ENST00000416754.1	chr21:36423612-36423961	-2045	F	0.27552	0.00625	0.263
ENSG00000110881.5	ACCN2	ENST00000228468.3	chr12:50450975-50451222	-265	T	0	0.00634	0.264
ENSG00000110881.5	ACCN2	ENST00000447966.1	chr12:50450975-50451222	-265	T	0	0.00634	0.264
[truncated: 354 more rows]

## Sheet: Suppl Table 6 Distance vs Expre
Supplementary Table 6. Distance and Expression-Based Target Gene Predictions (T-Gene, hg19) for De Novo cCREs. Only the most linked gene (lowest CnD p-value ) for each cCRE is displayed.
[truncated: 41 more rows]

[truncated: 5 more sheets:  Supp Table 7 Dist vs Expressio, Suppl Table 8 Input De Novo Gen,  Suppl Table 9 Input Single Cel,  Suppl Table 10 Single Cell   D,  Suppl Table 11 SIngle Cell DEG]
